# Supplementary material
Source: publisher figshare collection journal article supplement (https://gsajournals.figshare.com/articles/dataset/_/12808349)
Supplement: Supplementary file 1 [file 1]

## Sheet: S1
distribution	ploidy	loci	alleles	method	RMSE.PO	RMSE.FS	RMSE.HS	RMSE.GPGO	RMSE.UN	RMSE.GUGN	RMSE.UR	IC.PO	IC.FS	IC.HS	IC.GPGO	IC.UN	IC.GUGN	IC.UR	meancorrelation.farthing	meancorrelation.iac	CCC.farthing	CCC.iac	CCC.lwrci.farthing	CCC.uprci.farthing	CCC.lwrci.iac	CCC.uprci.iac
uniform	2n = 2x	5	2	MM	0.0213051	0.0247074	0.0217344	0.0745282	0.013753	0.00558096	0.0828708	0.07	0.04	0.05	0.04	0.06	0.1	0.1694	0.256584	0.307504	0.117157	0.165904	0.107282	0.127009	0.146366	0.185312
uniform	2n = 2x	5	2	ML	0.0692075	0.047454	0.137393	0.0794014	0.205352	0.210648	0.320195	0.35	0.19	0.01	0.02	0.05	0.25	0.4536	0.23425	0.270586	0.134728	0.161444	0.122059	0.147352	0.138973	0.183749
uniform	2n = 2x	5	2	RI	0.748443	0.565731	0.312317	0.110954	0.995594	0.128808	0.0191168	0.1	0	0	0	0	0	0.016	0.0145597	0.00392249	0.00128478	0.000438819	-0.00499645	0.00756591	-0.0132112	0.0140887
uniform	2n = 2x	5	2	LO	0.145411	0.259962	0.19421	0.370442	0.0761432	0.340059	0.080209	0.1	0.1	0	0.1	0.1	0.1	0.108	0.234433	0.257364	0.10686	0.141504	0.0752186	0.138287	0.0767883	0.205033
uniform	2n = 2x	5	2	WE	0.156677	0.286196	0.212105	0.378014	0.0546082	0.314829	0.07205	0	0.1	0	0.1	0	0.1	0.24	0.244807	0.253967	0.108677	0.140692	0.0780771	0.139072	0.0754228	0.20476
uniform	2n = 2x	5	2	VR	0.0133689	0.00442506	0.0666017	0.00589599	0.0298663	0.00294013	0.0945669	0.09	0.08	0.1	0.12	0.07	0.14	0.124	0.256837	0.297751	0.117484	0.156806	0.107551	0.127394	0.137652	0.175843
uniform	2n = 2x	5	2	PD	0.0133147	0.00555149	0.0648532	0.00533862	0.0284017	0.00309891	0.0931802	0.09	0.08	0.1	0.13	0.07	0.11	0.1225	0.257102	0.297541	0.11771	0.156532	0.107769	0.127627	0.137396	0.175551
uniform	2n = 2x	5	2	FA	NA	NA	NA	NA	NA	NA	NA	NA	NA	NA	NA	NA	NA	NA	NA	NA	NA	NA	NA	NA	NA	NA
uniform	2n = 4x	5	2	MM	0.325821	0.33622	0.130497	0.139829	0.101052	0.0877227	0.0394625	0.05	0.03	0.23	0.17	0.05	0.14	0.4624	0.105659	0.112279	0.0631258	0.0793238	0.0497513	0.0764777	0.0523258	0.106206
uniform	2n = 4x	5	2	ML	0.00224545	0.0364578	0.176566	0.105661	0.160549	0.225898	0.341472	0.1	0.04	0.1	0.13	0.05	0.16	0.4344	0.0978256	0.1039	0.0495352	0.0586428	0.0381789	0.0608787	0.036982	0.0802486
uniform	2n = 4x	5	2	RI	2.61735	3.66557	1.7472	1.07558	0.511047	3.29082	0.191421	0	0	0	0	0	0	0.014	0.0138421	0.0708016	0.00048509	0.00295358	-0.00200951	0.00297968	-0.0021241	0.0080311
uniform	2n = 4x	5	2	LO	0.233317	0.256765	0.0610761	0.0520493	0.0470081	0.167508	0.111906	0.1	0	0	0.1	0.1	0.1	0.088	0.142812	0.131054	0.0594172	0.0724882	0.0300199	0.0887118	0.00549703	0.138832
uniform	2n = 4x	5	2	WE	0.202517	0.261396	0.103531	0.0344357	0.014758	0.148445	0.109632	0	0	0	0	0	0	0.136	0.152219	0.131069	0.0633176	0.0707536	0.0339823	0.0925439	0.00536104	0.135544
uniform	2n = 4x	5	2	VR	0.0797252	0.101333	0.0448549	0.0582417	0.0954209	0.0796821	0.0930129	0.07	0.02	0.07	0.11	0.12	0.09	0.0881	0.24049	0.283855	0.107455	0.152973	0.097707	0.117182	0.133269	0.172557
uniform	2n = 4x	5	2	PD	0.408136	0.449269	0.228342	0.217089	0.109485	0.0588802	0.0272516	0.04	0.01	0	0	0.02	0.46	0.7184	0.104557	0.116643	0.0644032	0.0892829	0.0505599	0.0782218	0.0599528	0.118459
uniform	2n = 4x	5	2	FA	0.303914	0.355047	0.226968	0.235276	0.0986805	0.0316463	0.197143	0.01	0.04	0.13	0.07	0.14	0.2	0.1316	0.146273	0.164781	0.0912214	0.125118	0.0772929	0.105114	0.0963053	0.153722
uniform	2n = 6x	5	2	MM	0.462973	0.441866	0.193402	0.227358	0.105224	0.0536252	0.00890681	0	0	0.02	0	0.08	0.19	0.803	0.050441	0.0423958	0.0312704	0.029527	0.0173296	0.045199	0.00274424	0.0562674
uniform	2n = 6x	5	2	ML	0.0708897	0.131838	0.16772	0.0590258	0.182215	0.184601	0.328472	0.13	0.14	0.01	0.03	0.1	0.18	0.4416	0.0483662	0.0894599	0.0262689	0.0506259	0.0140646	0.0384654	0.0288953	0.0723086
uniform	2n = 6x	5	2	RI	1.27617	0.76032	0.756793	4.28278	0.860984	0.664564	0.0890352	0	0	0	0	0.3	0	0.012	0.0970727	0.069104	0.00248287	0.00206621	0.000670543	0.00429518	-0.00157455	0.0057069
uniform	2n = 6x	5	2	LO	0.165719	0.223526	0.00993774	0.0661214	0.0308055	0.0651317	0.0781595	0.1	0	0.2	0.1	0.2	0.1	0.092	0.131715	0.0770741	0.0519148	0.027941	0.0240544	0.0796947	-0.0161849	0.0719583
uniform	2n = 6x	5	2	WE	0.169372	0.244927	0.0347639	0.0548635	0.0672508	0.109182	0.0644061	0.3	0.1	0	0.2	0.2	0	0.136	0.140165	0.077659	0.0553129	0.0276099	0.0274661	0.0830739	-0.0156629	0.0707795
uniform	2n = 6x	5	2	VR	0.00891893	0.065892	0.00510297	0.0513708	0.00777358	0.0163858	0.107873	0.04	0.08	0.1	0.05	0.12	0.12	0.0919	0.261833	0.285864	0.111085	0.160367	0.101881	0.12027	0.139895	0.180701
uniform	2n = 6x	5	2	PD	0.471982	0.468704	0.231375	0.235363	0.0981736	0.0482829	0.0165039	0.01	0	0	0	0.01	0.51	0.9396	0.0333178	0.00546576	0.00964921	0.00137548	0.00313522	0.0161624	-0.00830121	0.0110519
uniform	2n = 6x	5	2	FA	0.367554	0.40155	0.230453	0.211235	0.0988917	0.0711908	0.199888	0.04	0.03	0.04	0.1	0.09	0.23	0.2094	0.143096	0.122589	0.09181	0.0964984	0.0774557	0.106126	0.0663806	0.12644
uniform	2n = 8x	5	2	MM	0.48195	0.493266	0.251416	0.225106	0.131414	0.0665481	0.0103459	0	0	0	0.03	0.01	0.15	0.7937	0.0591221	0.0284943	0.0261391	0.0102246	0.0161908	0.0360822	-0.00357505	0.0240204
uniform	2n = 8x	5	2	ML	0.145809	0.128839	0.00347873	0.044529	0.454291	0.115297	0.393099	0	0	0	0	0	0.2	0.412	0.0912177	0.0329961	0.0403612	0.0135139	0.00888348	0.071759	-0.0364553	0.0634156
uniform	2n = 8x	5	2	RI	0.23908	0.0423616	0.189525	0.43947	0.114569	0.189041	0.104324	0	0.2	0.1	0.1	0.2	0.1	0.056	0.123468	0.0818892	0.0304576	0.0272052	0.0130285	0.0478682	-0.0132048	0.0675266
uniform	2n = 8x	5	2	LO	0.275843	0.0581659	0.259	0.404676	0.0195044	0.235711	0.0968058	0	0	0	0.1	0	0.3	0.11	0.0636212	0.0989968	0.0223046	0.0583072	-0.00261437	0.0471958	-0.0133122	0.129331
uniform	2n = 8x	5	2	WE	0.290397	0.0333564	0.217007	0.384808	0.0230654	0.158748	0.00146369	0	0.1	0	0	0.2	0.2	0.099	0.0790563	0.0660996	0.0246879	0.0363311	0.00252427	0.0468274	-0.0306298	0.102967
uniform	2n = 8x	5	2	VR	0.0368052	0.0623899	0.0370045	0.04306	0.120527	0.0732678	0.0940911	0.14	0.16	0.15	0.08	0.11	0.08	0.0923	0.223029	0.277829	0.0970767	0.145007	0.0875449	0.106591	0.125862	0.164045
uniform	2n = 8x	5	2	PD	0.492526	0.490442	0.239162	0.243701	0.11824	0.0563373	0.00825354	0	0	0	0	0	0.29	0.9905	-0.0117322	0.0447851	-0.0012575	0.00475563	-0.00366765	0.00115267	0.000671452	0.00883965
uniform	2n = 8x	5	2	FA	0.400042	0.394046	0.222216	0.216192	0.0882099	0.055389	0.190863	0.05	0.05	0.06	0.04	0.16	0.13	0.2812	0.119416	0.145215	0.0768294	0.115274	0.0623986	0.091228	0.0850012	0.145334
uniform	2n = 4x*	5	2	MM	0.288371	0.336373	0.176817	0.148094	0.101243	0.0652486	0.0452115	0.04	0.01	0.17	0.17	0.03	0.16	0.4484	0.0868795	0.121901	0.0497802	0.0834622	0.0369305	0.0626134	0.0573219	0.109488
uniform	2n = 4x*	5	2	ML	0.0208791	0.0493297	0.111946	0.121055	0.13104	0.210197	0.341764	0.09	0.09	0.13	0.06	0.06	0.16	0.4262	0.0840098	0.146377	0.0469125	0.0893249	0.0343859	0.0594243	0.0659996	0.112553
uniform	2n = 4x*	5	2	RI	1.45322	1.78921	0.0405423	2.55885	1.16885	0.479997	0.491049	0.2	0	0.1	0	0	0.1	0.008	0.0133487	0.0444697	0.000434885	0.00155075	-0.00188417	0.00275393	-0.0027004	0.00580183
uniform	2n = 4x*	5	2	LO	0.309164	0.184796	0.0935401	0.00596572	0.286898	0.0691798	0.102154	0.1	0	0	0	0	0.1	0.087	0.193229	0.115054	0.0965062	0.0501713	0.0614007	0.131373	-0.00273296	0.102796
uniform	2n = 4x*	5	2	WE	0.336179	0.159346	0.0637829	0.0310096	0.338297	0.0197514	0.093494	0.1	0.1	0	0	0	0	0.113	0.216469	0.1217	0.105372	0.0525698	0.0713996	0.139101	0.000184146	0.104668
uniform	2n = 4x*	5	2	VR	0.0237787	0.0267665	0.0469312	0.0101784	0.0258315	0.0320762	0.0996161	0.01	0.05	0.1	0.1	0.08	0.07	0.0979	0.233875	0.316679	0.106951	0.175371	0.0969567	0.116923	0.155401	0.195197
uniform	2n = 4x*	5	2	PD	0.408016	0.418158	0.195117	0.218205	0.0778522	0.0390248	0.0333161	0.03	0.02	0.01	0.01	0.09	0.43	0.6948	0.133444	0.13982	0.0836883	0.108471	0.0696114	0.097732	0.0788173	0.137933
uniform	2n = 4x*	5	2	FA	0.35001	0.327275	0.219825	0.20385	0.119291	0.0498497	0.198037	0.02	0.05	0.03	0.09	0.13	0.2	0.119	0.136045	0.173434	0.0858157	0.133017	0.0717089	0.0998882	0.103934	0.161874
uniform	2n = 6x*	5	2	MM	0.462332	0.449133	0.218867	0.244181	0.108365	0.0778767	0.0117552	0	0	0.02	0.02	0.08	0.23	0.8258	0.046269	0.0613547	0.0279285	0.044917	0.0143538	0.0414928	0.0167731	0.0729897
uniform	2n = 6x*	5	2	ML	0.0455168	0.0984739	0.153063	0.11417	0.20003	0.24845	0.340947	0.15	0.07	0.07	0.03	0.04	0.12	0.4244	0.0898722	0.137529	0.0495023	0.0814958	0.0371504	0.0618392	0.058818	0.10409
uniform	2n = 6x*	5	2	RI	0.172099	3.12161	3.46395	NA	3.24146	NA	NA	0	0	0	0.1	0	0	0.016	NA	NA	NA	NA	NA	NA	NA	NA
uniform	2n = 6x*	5	2	LO	0.278913	0.0332968	0.0333453	0.128457	0.403485	0.206975	0.128992	0	0.1	0.1	0	0	0.1	0.09	0.0396991	0.170007	0.012827	0.073169	-0.0101592	0.0357998	0.0212629	0.124682
uniform	2n = 6x*	5	2	WE	0.264287	0.0726011	0.0236147	0.116018	0.359009	0.164686	0.09797	0.1	0.2	0.2	0	0	0	0.134	0.0464102	0.151781	0.0146337	0.0634067	-0.00779121	0.0370439	0.0129006	0.11359
uniform	2n = 6x*	5	2	VR	0.0924705	0.0178429	0.00728245	0.00908248	0.0269798	0.0195106	0.0928605	0.07	0.05	0.04	0.1	0.14	0.09	0.1062	0.236225	0.280033	0.104272	0.150367	0.0946391	0.113885	0.130714	0.169902
uniform	2n = 6x*	5	2	PD	0.481813	0.479995	0.233682	0.237605	0.113277	0.0511362	0.0166333	0	0.01	0	0	0	0.47	0.949	0.0186773	0.058213	0.00582405	0.0205595	-0.0011882	0.0128357	0.00697593	0.0341355
uniform	2n = 6x*	5	2	FA	0.368046	0.394098	0.247162	0.234005	0.11685	0.0586552	0.197098	0.04	0.06	0.07	0.07	0.13	0.16	0.2022	0.127664	0.138355	0.0827546	0.11059	0.0682324	0.0972417	0.0801164	0.140857
uniform	2n = 8x*	5	2	MM	0.497505	0.48658	0.23716	0.247122	0.109824	0.0586086	0.00977101	0	0	0.02	0.03	0.01	0.24	0.7808	0.00582124	0.0562031	0.00216876	0.0251149	-0.00620836	0.0105456	0.00792666	0.0422883
uniform	2n = 8x*	5	2	ML	0.0241996	0.110136	0.137854	0.127843	0.21796	0.235701	0.361129	0	0	0.1	0	0	0	0.458	0.0275086	0.172718	0.0120472	0.0826266	-0.0191284	0.0431994	0.024271	0.140421
uniform	2n = 8x*	5	2	RI	0.819152	0.308848	0.398134	0.0497261	0.155172	0.211411	0.100507	0.1	0.1	0	0.1	0	0	0.036	-0.0114494	0.102598	-0.00271751	0.0318127	-0.0196107	0.0141772	-0.00583363	0.0693689
uniform	2n = 8x*	5	2	LO	0.282027	0.346362	0.174373	0.139205	0.00341633	0.0972761	0.0579535	0.1	0.2	0.1	0.4	0	0.1	0.08	0.00420891	0.194896	0.00136434	0.108509	-0.0217083	0.0244356	0.0417186	0.174333
uniform	2n = 8x*	5	2	WE	0.348049	0.287411	0.191058	0.164747	0.029567	0.0897623	0.0301248	0	0.1	0	0	0.1	0	0.063	-0.00567263	0.159939	-0.00166345	0.0800375	-0.0225349	0.0192095	0.0197095	0.139785
uniform	2n = 8x*	5	2	VR	0.0205327	0.0253398	0.0314426	0.033012	0.00588007	0.0121914	0.0971844	0.07	0.14	0.14	0.04	0.15	0.09	0.0932	0.244388	0.277419	0.1076	0.151465	0.0980096	0.117171	0.131456	0.171351
uniform	2n = 8x*	5	2	PD	0.49596	0.482096	0.235914	0.244487	0.113178	0.0530408	0.00871768	0	0	0	0	0	0.48	0.9891	0.0174845	-0.0173507	0.00207862	-0.00173366	-0.000594762	0.00475196	-0.00557592	0.00210864
uniform	2n = 8x*	5	2	FA	0.450671	0.40158	0.208311	0.209623	0.142071	0.0494115	0.187422	0.01	0.01	0.13	0.06	0.12	0.14	0.2788	0.11147	0.11677	0.0712795	0.0912319	0.0569269	0.0856026	0.0613129	0.120987
uniform	2n = 2x	10	2	MM	0.0152806	0.0226272	0.0019556	0.0246026	0.0123308	0.00580879	0.0855494	0.2	0.23	0.13	0.11	0.1	0.09	0.1211	0.319347	0.37446	0.186895	0.257234	0.174541	0.199189	0.233408	0.280751
uniform	2n = 2x	10	2	ML	0.0420838	0.0257227	0.0979267	0.0994479	0.108531	0.184452	0.258097	0.6	0.27	0.06	0.04	0.06	0.25	0.4896	0.305858	0.380851	0.21812	0.267986	0.202984	0.233152	0.242731	0.292877
uniform	2n = 2x	10	2	RI	0.578511	1.55359	0.0264894	1.37154	0.631977	0.410853	0.215712	0	0	0.1	0	0	0	0.012	0.0353817	0.00195422	0.00196714	0.000131767	-0.00198856	0.00592277	-0.00809563	0.00835915
uniform	2n = 2x	10	2	LO	0.0285183	0.0013854	0.0145947	0.164732	0.0676377	0.0912857	0.0880565	0.1	0.1	0.1	0	0.2	0.1	0.162	0.376617	0.333444	0.234911	0.227903	0.19438	0.274641	0.150049	0.302949
uniform	2n = 2x	10	2	WE	0.0923721	0.0253797	0.0571348	0.215935	0.0488055	0.0974671	0.0489624	0.1	0.1	0.2	0	0	0.1	0.214	0.388646	0.341791	0.21318	0.233936	0.177413	0.248385	0.156031	0.308949
uniform	2n = 2x	10	2	VR	0.062536	0.0311865	0.0110888	0.074514	0.0669864	0.0447738	0.101251	0.13	0.16	0.11	0.16	0.14	0.15	0.1265	0.322586	0.407593	0.184497	0.278342	0.172324	0.196614	0.255139	0.301224
uniform	2n = 2x	10	2	PD	0.0619774	0.0309543	0.0105828	0.0745568	0.0659991	0.0448608	0.0997029	0.12	0.17	0.11	0.16	0.15	0.15	0.1255	0.323628	0.407675	0.185503	0.27839	0.173311	0.197639	0.255189	0.30127
uniform	2n = 2x	10	2	FA	NA	NA	NA	NA	NA	NA	NA	NA	NA	NA	NA	NA	NA	NA	NA	NA	NA	NA	NA	NA	NA	NA
uniform	2n = 4x	10	2	MM	0.22376	0.246455	0.0277425	0.110986	0.0828122	0.00268819	0.074924	0.05	0.06	0.21	0.18	0.12	0.11	0.2718	0.115641	0.166117	0.0626945	0.109326	0.0505771	0.0747934	0.0844062	0.134109
uniform	2n = 4x	10	2	ML	0.0796056	0.108426	0.113219	0.0630137	0.0951051	0.177452	0.276184	0.12	0.15	0.17	0.06	0.05	0.14	0.458	0.129243	0.190493	0.0864186	0.140012	0.0715119	0.101287	0.112231	0.167575
uniform	2n = 4x	10	2	RI	2.70136	0.906512	0.953935	0.264996	2.34509	1.10706	0.0669201	0	0.1	0	0	0	0	0.012	-0.0580645	0.0673583	-0.00284898	0.00489143	-0.00633825	0.00064035	-0.00395025	0.0137323
uniform	2n = 4x	10	2	LO	0.286303	0.178224	0.122623	0.0916089	0.00529868	0.0310622	0.107952	0.1	0	0.2	0	0	0.1	0.074	0.173245	0.16768	0.0828262	0.0995833	0.0492503	0.116215	0.0280876	0.170065
uniform	2n = 4x	10	2	WE	0.306465	0.16351	0.150561	0.120721	0.0223259	0.0391403	0.095098	0.2	0	0	0.1	0	0.1	0.086	0.19587	0.1768	0.0935276	0.0996765	0.0602443	0.126603	0.0318788	0.166561
uniform	2n = 4x	10	2	VR	0.000591529	0.0402606	0.0186543	0.00434417	0.0126142	0.0264237	0.0992034	0.08	0.07	0.12	0.16	0.18	0.13	0.1086	0.340245	0.385348	0.191899	0.265871	0.180031	0.203712	0.242111	0.289312
uniform	2n = 4x	10	2	PD	0.427789	0.428872	0.204579	0.209943	0.10279	0.0499508	0.0300356	0.01	0	0.07	0.06	0.09	0.35	0.7111	0.163312	0.227901	0.0887673	0.157359	0.076542	0.100966	0.131219	0.183281
uniform	2n = 4x	10	2	FA	0.341171	0.346241	0.176451	0.193278	0.119273	0.0546882	0.198132	0.03	0.04	0.11	0.1	0.13	0.24	0.2346	0.217889	0.257876	0.143559	0.217358	0.128921	0.158134	0.186159	0.24812
uniform	2n = 6x	10	2	MM	0.441085	0.425963	0.182534	0.184834	0.107697	0.0603834	0.0175552	0	0	0.02	0.04	0.08	0.21	0.7083	0.0623266	0.0965215	0.0406236	0.0760558	0.0259744	0.0552554	0.0458313	0.106141
uniform	2n = 6x	10	2	ML	0.0649821	0.152535	0.124632	0.0866564	0.172227	0.194719	0.281017	0.16	0.11	0.03	0.1	0.06	0.11	0.4604	0.0755587	0.140222	0.049974	0.0986985	0.0351404	0.0647856	0.0718372	0.125417
uniform	2n = 6x	10	2	RI	1.9301	NA	NA	NA	NA	NA	NA	0	0	0	0	0.1	0	0.018	NA	NA	NA	NA	NA	NA	NA	NA
uniform	2n = 6x	10	2	LO	0.110738	0.432271	0.0395047	0.150416	0.15182	0.00681993	0.0722818	0.2	0	0.2	0.3	0	0.1	0.12	0.0822668	0.181812	0.0302692	0.0824057	0.00414024	0.0563569	0.0278741	0.136448
uniform	2n = 6x	10	2	WE	0.114066	0.449261	0.0590765	0.137471	0.135345	0.0329112	0.0710068	0.2	0	0.1	0.3	0.1	0.1	0.104	0.0868221	0.183787	0.0317617	0.082575	0.00579492	0.0576858	0.0285335	0.136135
uniform	2n = 6x	10	2	VR	0.0375289	0.0789263	0.010514	0.0281714	0.0213738	0.0119946	0.0965823	0.08	0.06	0.19	0.16	0.16	0.16	0.1236	0.32837	0.400251	0.185818	0.276073	0.173864	0.197717	0.252547	0.299273
uniform	2n = 6x	10	2	PD	0.482666	0.477989	0.231086	0.234025	0.108136	0.0462128	0.0149365	0	0	0	0.01	0.02	0.52	0.9487	0.0697657	0.0811645	0.015225	0.0195031	0.0103113	0.0201379	0.0102588	0.028744
uniform	2n = 6x	10	2	FA	0.407153	0.372834	0.205562	0.218519	0.109616	0.0530283	0.197373	0.01	0.01	0.07	0.09	0.19	0.33	0.2952	0.173177	0.209393	0.107284	0.164854	0.0934017	0.121125	0.135093	0.194317
uniform	2n = 8x	10	2	MM	0.491597	0.488757	0.24853	0.253969	0.11655	0.0631087	0.0144539	0	0	0.03	0	0.03	0.16	0.7568	0.0209102	0.0811026	0.00854006	0.0428441	-0.000644499	0.0177232	0.0225284	0.0631244
uniform	2n = 8x	10	2	ML	0.179853	0.137756	0.0178824	0.019132	0.185291	0.288678	0.362416	0.2	0	0	0	0.1	0.1	0.418	0.118482	0.0848271	0.0566956	0.0496536	0.0226954	0.0905649	-0.021741	0.120544
uniform	2n = 8x	10	2	RI	0.438965	0.182728	0.477347	0.48526	0.358567	0.375716	0.079342	0	0	0	0	0.1	0	0.048	0.107993	0.102292	0.0293472	0.0388207	0.0101145	0.0485583	-0.00732552	0.0848018
uniform	2n = 8x	10	2	LO	0.382851	0.353118	0.277593	0.310035	0.035491	0.00098226	0.0896769	0	0.1	0.1	0.1	0.1	0.1	0.126	0.101536	0.0936496	0.0455199	0.0547624	0.013719	0.0772288	-0.0164126	0.125385
uniform	2n = 8x	10	2	WE	0.346732	0.33877	0.247807	0.359964	0.0695109	0.0530215	0.0741882	0	0.2	0.2	0.1	0	0.4	0.097	0.0965696	0.0800043	0.0419558	0.0430634	0.011135	0.072697	-0.0224718	0.10823
uniform	2n = 8x	10	2	VR	0.0645226	0.0183049	0.00580124	0.0256913	0.00611404	0.0175221	0.0944668	0.17	0.14	0.2	0.15	0.12	0.19	0.1188	0.33999	0.360365	0.188845	0.25441	0.177196	0.200441	0.229736	0.278757
uniform	2n = 8x	10	2	PD	0.490764	0.487701	0.23866	0.242639	0.116527	0.0553238	0.00958527	0	0	0	0	0	0.34	0.9924	0.0132555	0.0803089	0.00139734	0.00776529	-0.000973089	0.00376775	0.00404488	0.0114855
uniform	2n = 8x	10	2	FA	0.419055	0.374674	0.194577	0.19951	0.120574	0.068755	0.189915	0.03	0.05	0.11	0.06	0.11	0.17	0.3252	0.172346	0.159571	0.102342	0.11842	0.0890147	0.115632	0.0900746	0.146573
uniform	2n = 4x*	10	2	MM	0.193996	0.281293	0.136469	0.122338	0.0620564	0.0638384	0.0610743	0.07	0.03	0.15	0.07	0.1	0.21	0.2571	0.150273	0.174201	0.0809786	0.113395	0.0689891	0.0929447	0.0887736	0.137878
uniform	2n = 4x*	10	2	ML	0.0805962	0.110653	0.0362647	0.0388942	0.133018	0.113737	0.274764	0.17	0.15	0.17	0.17	0.05	0.16	0.4648	0.145051	0.169501	0.104735	0.129872	0.0886998	0.120717	0.10083	0.158692
uniform	2n = 4x*	10	2	RI	1.86415	0.118245	0.327134	0.491299	1.17545	2.93301	0.0692111	0	0.1	0.1	0	0	0.1	0.004	0.0829719	-0.0407281	0.00321423	-0.0028139	0.000465957	0.00596246	-0.0112373	0.00560987
uniform	2n = 4x*	10	2	LO	0.217114	0.222001	0.126722	0.0330471	0.0142745	0.11005	0.101158	0.1	0.2	0.1	0.1	0.2	0	0.088	0.162381	0.269565	0.072992	0.166315	0.0413149	0.104522	0.0936115	0.237254
uniform	2n = 4x*	10	2	WE	0.258164	0.247509	0.0791247	0.0747414	0.0481479	0.144569	0.0807449	0	0.1	0	0	0.3	0	0.088	0.178586	0.271162	0.0811435	0.164954	0.0492605	0.112861	0.0932916	0.234915
uniform	2n = 4x*	10	2	VR	0.0382838	0.0394674	0.0232713	0.00452538	0.0234068	0.0134224	0.0927023	0.1	0.12	0.14	0.13	0.12	0.2	0.1226	0.352383	0.415688	0.204611	0.28573	0.192493	0.216667	0.262515	0.308614
uniform	2n = 4x*	10	2	PD	0.438624	0.424445	0.216085	0.188725	0.100932	0.0483103	0.0309389	0.01	0	0.05	0.09	0.1	0.39	0.7267	0.164377	0.228547	0.092546	0.163137	0.0798919	0.10517	0.136154	0.189878
uniform	2n = 4x*	10	2	FA	0.38052	0.355831	0.19908	0.178017	0.111788	0.0559804	0.199291	0.02	0.05	0.09	0.04	0.22	0.23	0.2318	0.186652	0.260834	0.124302	0.213656	0.109455	0.139093	0.183257	0.243647
uniform	2n = 6x*	10	2	MM	0.431909	0.420312	0.169798	0.191565	0.0960272	0.020777	0.0160973	0.01	0.02	0.03	0.05	0.14	0.23	0.6969	0.0828388	0.101774	0.0543265	0.0766202	0.0395945	0.0690349	0.0477308	0.105382
uniform	2n = 6x*	10	2	ML	0.0746602	0.143896	0.102755	0.0644423	0.137487	0.189992	0.283118	0.15	0.13	0.09	0.11	0.06	0.15	0.4436	0.117183	0.157246	0.0817108	0.113555	0.0661475	0.0972342	0.0860791	0.140858
uniform	2n = 6x*	10	2	RI	0.384975	0.847005	0.762853	0.337984	1.90203	0.487087	0.839066	0.1	0	0	0	0.1	0	0.016	-0.0197661	0.0158878	-0.00107843	0.000710963	-0.00496169	0.00280486	-0.00474873	0.00617061
uniform	2n = 6x*	10	2	LO	0.247764	0.107706	0.0896303	0.144878	0.0446046	0.0252166	0.100636	0	0.2	0.1	0.3	0.1	0.1	0.12	0.0690805	0.146528	0.0325427	0.0958005	-0.000940882	0.0659534	0.0167316	0.173679
uniform	2n = 6x*	10	2	WE	0.293292	0.144258	0.0333246	0.165784	0.0680799	0.0263624	0.0870353	0	0	0	0.3	0	0.1	0.142	0.0816238	0.127575	0.0379012	0.0818643	0.00494178	0.0707783	0.00404364	0.158699
uniform	2n = 6x*	10	2	VR	0.0151414	0.0228434	0.0136971	0.0275097	0.0151383	0.0183244	0.0957851	0.12	0.14	0.09	0.16	0.12	0.13	0.1282	0.335469	0.373448	0.188942	0.254899	0.177097	0.200732	0.231189	0.278307
uniform	2n = 6x*	10	2	PD	0.478479	0.471919	0.231913	0.235177	0.118781	0.0535341	0.0160511	0	0	0	0.01	0	0.48	0.9585	0.0581777	0.0723303	0.0147248	0.0168496	0.00902836	0.0204203	0.00788831	0.0258081
uniform	2n = 6x*	10	2	FA	0.373934	0.339269	0.208379	0.18927	0.139413	0.0620003	0.19614	0.01	0.03	0.06	0.05	0.17	0.25	0.2986	0.150546	0.174591	0.093862	0.132071	0.0798768	0.10781	0.10325	0.16067
uniform	2n = 8x*	10	2	MM	0.48786	0.484091	0.241876	0.255197	0.121281	0.0746542	0.0150935	0	0	0.02	0.02	0.01	0.21	0.7799	0.0135763	0.0288763	0.00696506	0.0159477	-0.00457121	0.0184995	-0.00529131	0.0371724
uniform	2n = 8x*	10	2	ML	0.118742	0.276486	0.105474	0.192421	0.226466	0.262078	0.365819	0.2	0	0.1	0	0	0	0.406	0.00699656	0.0709167	0.00356812	0.0370968	-0.0327253	0.0398522	-0.0267422	0.100634
uniform	2n = 8x*	10	2	RI	0.597551	0.707713	0.181579	0.257776	0.167214	0.0870583	0.106691	0.1	0.1	0.1	0	0	0	0.034	-0.00236896	0.105706	-0.000592923	0.026337	-0.0184086	0.0172231	-0.00391008	0.056536
uniform	2n = 8x*	10	2	LO	0.382096	0.459168	0.238924	0.147861	0.0196526	0.0645023	0.106806	0.1	0	0.1	0	0.1	0.4	0.114	-0.0347405	0.0812061	-0.0155672	0.052224	-0.0474212	0.0163184	-0.0261083	0.129919
uniform	2n = 8x*	10	2	WE	0.413276	0.413144	0.194709	0.149056	0.00672034	0.0474299	0.0638989	0	0.1	0.1	0	0.2	0.1	0.11	-0.00802774	0.0915677	-0.00353198	0.0554862	-0.0348382	0.0277812	-0.018249	0.128621
uniform	2n = 8x*	10	2	VR	0.00506855	0.0631022	0.0384746	0.00889994	0.0255844	0.00278948	0.0895333	0.13	0.16	0.16	0.14	0.09	0.19	0.1304	0.342265	0.380883	0.190204	0.254056	0.178503	0.201851	0.230979	0.276848
uniform	2n = 8x*	10	2	PD	0.493871	0.480589	0.232247	0.243174	0.110907	0.0515467	0.00917523	0	0	0	0	0	0.43	0.9922	0.00278195	0.0189171	0.00023482	0.00259703	-0.00166313	0.00213276	-0.00268217	0.00787608
uniform	2n = 8x*	10	2	FA	0.404997	0.418423	0.210878	0.224152	0.0988685	0.0695574	0.190244	0.01	0.02	0.06	0.07	0.12	0.22	0.3398	0.159566	0.197503	0.0945316	0.153751	0.0812284	0.107801	0.124237	0.182992
uniform	2n = 2x	15	2	MM	0.0157207	0.0266042	0.0249368	0.0513587	0.0394683	0.0138621	0.0917332	0.31	0.14	0.2	0.11	0.14	0.14	0.1446	0.404396	0.489881	0.269363	0.380094	0.255968	0.282655	0.355703	0.403967
uniform	2n = 2x	15	2	ML	0.0525565	0.00471948	0.0253016	0.0959793	0.0533186	0.104195	0.22062	0.71	0.15	0.2	0.09	0.16	0.25	0.4996	0.403114	0.513692	0.327928	0.414414	0.3119	0.34377	0.388708	0.439476
uniform	2n = 2x	15	2	RI	1.86837	0.145974	1.44593	0.65385	0.0479979	0.941201	0.687351	0	0.1	0	0	0	0	0.012	0.012018	0.0873889	0.000809076	0.0079573	-0.00398317	0.00560128	-0.0031219	0.0190345
uniform	2n = 2x	15	2	LO	0.0526681	0.152024	0.0937355	0.0126433	0.0637242	0.0231662	0.101317	0.2	0	0.1	0	0.4	0.3	0.17	0.414342	0.520359	0.256265	0.437463	0.216329	0.295345	0.355249	0.512961
uniform	2n = 2x	15	2	WE	0.0344122	0.162357	0.114297	0.0277026	0.0536092	0.0162478	0.0602823	0.1	0	0.2	0	0.2	0	0.158	0.423793	0.511196	0.264375	0.421758	0.225135	0.302758	0.340214	0.497006
uniform	2n = 2x	15	2	VR	0.03072	0.017429	0.0256168	0.000496902	0.00639106	0.0339354	0.102121	0.22	0.09	0.17	0.11	0.15	0.13	0.1434	0.41594	0.46847	0.268209	0.367098	0.255154	0.281166	0.342071	0.391604
uniform	2n = 2x	15	2	PD	0.0303441	0.0179235	0.0257471	0.000438729	0.00724985	0.0346398	0.100687	0.22	0.09	0.15	0.12	0.16	0.13	0.1416	0.416547	0.468304	0.268884	0.366863	0.255823	0.281846	0.341838	0.391368
uniform	2n = 2x	15	2	FA	NA	NA	NA	NA	NA	NA	NA	NA	NA	NA	NA	NA	NA	NA	NA	NA	NA	NA	NA	NA	NA	NA
uniform	2n = 4x	15	2	MM	0.186814	0.260303	0.0237842	0.0252238	0.0458247	0.0157892	0.0759094	0.03	0.12	0.12	0.12	0.11	0.13	0.1855	0.147609	0.189439	0.0767458	0.124296	0.0651765	0.0882945	0.0996104	0.148828
uniform	2n = 4x	15	2	ML	0.114066	0.135621	0.0973052	0.0656051	0.0806325	0.156394	0.25253	0.17	0.17	0.09	0.11	0.07	0.2	0.4698	0.154672	0.198914	0.11756	0.157913	0.100729	0.134323	0.128035	0.187504
uniform	2n = 4x	15	2	RI	0.744109	1.51995	2.31794	2.87699	0.480723	2.54172	0.108445	0	0	0	0	0	0	0.016	0.0324934	0.111952	0.00170986	0.00589819	-0.00203433	0.00545399	-0.000499902	0.0122958
uniform	2n = 4x	15	2	LO	0.163501	0.232761	0.133464	0.0931377	0.135063	0.0935822	0.0935995	0	0	0	0.1	0	0.2	0.122	0.10692	0.213183	0.0515252	0.156461	0.0173316	0.0855984	0.0690314	0.241506
uniform	2n = 4x	15	2	WE	0.185044	0.250063	0.127726	0.146137	0.136704	0.0637669	0.0778305	0.1	0	0.1	0	0	0.1	0.114	0.118744	0.219497	0.0583428	0.158175	0.0235463	0.0929981	0.072435	0.241594
uniform	2n = 4x	15	2	VR	0.0299372	0.0169259	0.021892	0.0044082	0.0132608	0.031679	0.0987217	0.17	0.13	0.22	0.11	0.17	0.12	0.141	0.394027	0.464737	0.259915	0.350788	0.246477	0.273254	0.32649	0.374623
uniform	2n = 4x	15	2	PD	0.417324	0.414336	0.21296	0.218218	0.106009	0.0501803	0.031868	0	0	0.04	0.04	0.11	0.37	0.7057	0.191427	0.236392	0.0902641	0.145261	0.0796357	0.100872	0.121951	0.168411
uniform	2n = 4x	15	2	FA	0.311078	0.30051	0.192524	0.194748	0.115909	0.0461603	0.1961	0.04	0.07	0.13	0.09	0.14	0.26	0.2778	0.248073	0.274598	0.162647	0.228954	0.148103	0.177121	0.198147	0.259309
uniform	2n = 6x	15	2	MM	0.423212	0.406232	0.134278	0.167903	0.0876938	0.0458631	0.0292022	0.01	0	0.11	0.03	0.08	0.13	0.598	0.0893034	0.0941647	0.0578241	0.074864	0.0432947	0.0723292	0.0443712	0.105217
uniform	2n = 6x	15	2	ML	0.0699547	0.163194	0.121775	0.0479974	0.106566	0.0990207	0.249706	0.11	0.14	0.07	0.13	0.12	0.2	0.4644	0.129808	0.17908	0.0962511	0.138932	0.0797488	0.112701	0.109584	0.168038
uniform	2n = 6x	15	2	RI	NA	NA	NA	NA	NA	NA	NA	0	0	0	0.1	0	0	0.01	NA	NA	NA	NA	NA	NA	NA	NA
uniform	2n = 6x	15	2	LO	0.157	0.40105	0.123803	0.232991	0.0503323	0.153394	0.07573	0	0.1	0.1	0.1	0.1	0.2	0.112	0.103323	0.118063	0.0451629	0.0646826	0.0141517	0.0760873	-0.00180966	0.130605
uniform	2n = 6x	15	2	WE	0.179439	0.414316	0.137816	0.257829	0.0431861	0.16294	0.0616067	0	0.1	0.1	0.1	0.1	0	0.104	0.114861	0.114043	0.0510365	0.0617329	0.0195532	0.0824187	-0.00398393	0.126919
uniform	2n = 6x	15	2	VR	0.0292426	0.0177013	0.016199	0.0106331	0.013499	0.0500975	0.100238	0.14	0.06	0.17	0.18	0.13	0.15	0.1378	0.394368	0.453098	0.250797	0.344134	0.237774	0.263731	0.319423	0.368378
uniform	2n = 6x	15	2	PD	0.48451	0.476364	0.235335	0.234928	0.111354	0.0498364	0.0145224	0	0	0	0	0	0.51	0.9457	0.024204	0.129814	0.00392195	0.0242284	0.000277823	0.00756596	0.0170422	0.031412
uniform	2n = 6x	15	2	FA	0.408286	0.380763	0.211356	0.184472	0.126639	0.0611574	0.199993	0.02	0	0.02	0.11	0.19	0.27	0.3558	0.188374	0.287402	0.110813	0.209458	0.0976164	0.123971	0.182224	0.236371
uniform	2n = 8x	15	2	MM	0.491704	0.474568	0.245255	0.252374	0.120658	0.0690781	0.0131059	0.01	0	0	0	0.03	0.18	0.7209	0.0553605	0.0554871	0.0310496	0.036144	0.0184342	0.0436551	0.0110948	0.0611478
uniform	2n = 8x	15	2	ML	0.0703125	0.136712	0.0190507	0.169868	0.145226	0.263096	0.363954	0	0	0.1	0	0	0.1	0.402	0.0842938	0.00863333	0.0464262	0.00467609	0.0072698	0.0854404	-0.0613384	0.0706499
uniform	2n = 8x	15	2	RI	0.246409	0.285941	0.248692	0.763286	0.156446	0.205698	0.0303485	0.1	0	0	0	0.1	0.1	0.058	0.126163	0.158622	0.0336838	0.0680746	0.0148298	0.0525137	0.0160684	0.119713
uniform	2n = 8x	15	2	LO	0.338451	0.302486	0.296072	0.380173	0.0171961	0.0233779	0.113272	0	0	0	0	0	0	0.092	0.0887057	0.125311	0.035639	0.0908364	0.00711963	0.0641005	0.00261276	0.177657
uniform	2n = 8x	15	2	WE	0.307016	0.386999	0.312077	0.4051	0.0681449	0.083959	0.0895191	0.1	0.2	0	0	0.1	0.1	0.086	0.101894	0.133427	0.0375911	0.0947006	0.0114328	0.0636981	0.00830134	0.179696
uniform	2n = 8x	15	2	VR	0.0115552	0.0379465	0.0614117	0.00732471	0.051066	0.02634	0.0941134	0.15	0.09	0.14	0.18	0.21	0.14	0.1412	0.389059	0.469397	0.244008	0.357212	0.23112	0.256811	0.332791	0.381155
uniform	2n = 8x	15	2	PD	0.490785	0.486972	0.238725	0.243206	0.117703	0.0557109	0.00899938	0	0	0	0	0	0.3	0.9881	0.0586271	0.0615801	0.00468991	0.00403969	0.00288923	0.00649055	0.00151613	0.00656321
uniform	2n = 8x	15	2	FA	0.404349	0.413836	0.195576	0.216191	0.106196	0.0469619	0.19013	0.01	0.01	0.08	0.05	0.15	0.23	0.3704	0.20085	0.249026	0.108836	0.177517	0.0966551	0.120985	0.150615	0.204156
uniform	2n = 4x*	15	2	MM	0.190988	0.181221	0.0920775	0.0899549	0.105245	0.132343	0.0712096	0.09	0.1	0.07	0.11	0.21	0.12	0.1522	0.183744	0.179421	0.09843	0.118684	0.0865844	0.110248	0.0937212	0.143498
uniform	2n = 4x*	15	2	ML	0.0973262	0.115235	0.018299	0.0502689	0.0817994	0.091241	0.2524	0.13	0.16	0.1	0.11	0.06	0.16	0.4674	0.200887	0.203726	0.159839	0.169921	0.142453	0.177126	0.138651	0.200852
uniform	2n = 4x*	15	2	RI	1.18486	0.776166	0.657869	0.152229	1.18545	0.612068	0.213525	0	0	0	0	0.1	0.1	0.016	-0.0462005	0.0588644	-0.00247553	0.00358139	-0.00628602	0.00133503	-0.0038321	0.0109945
uniform	2n = 4x*	15	2	LO	0.165414	0.0587123	0.0840889	0.0671236	0.291851	0.221132	0.0924462	0.3	0.3	0.1	0.1	0	0	0.092	0.19673	0.214947	0.0996626	0.125448	0.0641313	0.134941	0.0557731	0.193907
uniform	2n = 4x*	15	2	WE	0.169022	0.098425	0.0414988	0.0865688	0.324645	0.269764	0.0638948	0.1	0.3	0.1	0.1	0.1	0.1	0.106	0.223531	0.218809	0.117924	0.125485	0.0812936	0.154236	0.0570439	0.192752
uniform	2n = 4x*	15	2	VR	0.00924901	0.0206204	0.0407921	0.0327762	0.0446556	0.0372795	0.0939072	0.14	0.12	0.18	0.17	0.19	0.17	0.154	0.40023	0.448819	0.257657	0.349043	0.244548	0.270671	0.323729	0.373857
uniform	2n = 4x*	15	2	PD	0.42056	0.41278	0.204673	0.21495	0.108336	0.0562036	0.0333695	0.01	0	0.03	0.02	0.13	0.34	0.6835	0.211383	0.23742	0.106114	0.150702	0.0948132	0.117387	0.126642	0.174586
uniform	2n = 4x*	15	2	FA	0.321363	0.341522	0.213397	0.185329	0.143572	0.0670521	0.193355	0.06	0.03	0.08	0.18	0.09	0.25	0.2804	0.234863	0.240185	0.153311	0.196261	0.138802	0.167754	0.165682	0.226462
uniform	2n = 6x*	15	2	MM	0.415185	0.410197	0.178781	0.192985	0.0866077	0.0620949	0.0268439	0	0.03	0.1	0.04	0.07	0.18	0.6409	0.078651	0.0954772	0.0522498	0.0754372	0.0373302	0.0671461	0.0451284	0.105607
uniform	2n = 6x*	15	2	ML	0.0561692	0.150693	0.116401	0.0493681	0.159276	0.171073	0.26168	0.11	0.12	0.03	0.07	0.12	0.17	0.45	0.13785	0.232387	0.106598	0.184481	0.0894249	0.123707	0.154898	0.213732
uniform	2n = 6x*	15	2	RI	2.15091	0.180647	NA	2.09268	NA	NA	NA	0	0	0	0	0	0	0.008	NA	NA	NA	NA	NA	NA	NA	NA
uniform	2n = 6x*	15	2	LO	0.238498	0.127136	0.108945	0.324677	0.0739188	0.0122199	0.0900409	0.1	0.1	0.2	0.1	0.4	0.2	0.128	0.0959187	0.258973	0.049909	0.1636	0.0129683	0.0867137	0.0891902	0.236194
uniform	2n = 6x*	15	2	WE	0.253338	0.167103	0.0891303	0.346304	0.0395931	0.0288924	0.0881211	0.1	0	0.2	0	0.1	0.4	0.118	0.108889	0.262959	0.0576714	0.166356	0.0201259	0.0950545	0.0918949	0.238967
uniform	2n = 6x*	15	2	VR	0.0110471	0.00531392	0.0160127	0.0248075	0.00159858	0.029347	0.0893948	0.17	0.19	0.17	0.17	0.2	0.15	0.1476	0.393423	0.472641	0.247205	0.355894	0.234369	0.259954	0.331813	0.379511
uniform	2n = 6x*	15	2	PD	0.478852	0.469213	0.226349	0.238231	0.109542	0.052317	0.0151021	0	0	0	0	0.04	0.45	0.9488	0.0455869	0.1107	0.00919938	0.0257485	0.00465906	0.0137393	0.0167996	0.0346934
uniform	2n = 6x*	15	2	FA	0.39121	0.352067	0.210635	0.23214	0.10896	0.0618827	0.190254	0.03	0.06	0.06	0.04	0.08	0.33	0.3628	0.189212	0.265261	0.108216	0.200617	0.0953746	0.121021	0.172292	0.228611
uniform	2n = 8x*	15	2	MM	0.489497	0.487702	0.241878	0.243823	0.109224	0.0713935	0.0131605	0	0	0	0.06	0.03	0.22	0.7351	0.0157314	0.07796	0.00828265	0.0520563	-0.00355678	0.0201198	0.0263886	0.0776553
uniform	2n = 8x*	15	2	ML	0.162058	0.212876	0.0638814	0.0896871	0.332568	0.277601	0.343363	0	0.1	0	0	0	0	0.416	0.097049	0.149996	0.0514047	0.090201	0.0137471	0.0889167	0.0170129	0.162428
uniform	2n = 8x*	15	2	RI	0.466454	0.481789	0.191929	0.149115	0.329176	0.296196	0.0897503	0	0.1	0.1	0	0.1	0	0.056	0.0230049	0.11877	0.0079646	0.0527794	-0.0166748	0.0325944	-0.00114396	0.106397
uniform	2n = 8x*	15	2	LO	0.453721	0.415759	0.247004	0.166769	0.214063	0.160025	0.109211	0	0	0.1	0	0.1	0.2	0.132	0.00871909	0.172346	0.00394907	0.100121	-0.0282858	0.0361757	0.0301154	0.169148
uniform	2n = 8x*	15	2	WE	0.452428	0.390622	0.203942	0.136534	0.219118	0.125984	0.080187	0	0	0.3	0.2	0.2	0.1	0.109	0.0146674	0.181317	0.0065347	0.103797	-0.0251744	0.0382306	0.0349548	0.171659
uniform	2n = 8x*	15	2	VR	0.00136596	0.0206951	0.00994967	0.0381868	0.0223082	0.0362572	0.0966738	0.11	0.13	0.16	0.11	0.13	0.12	0.137	0.407279	0.457102	0.258541	0.353318	0.245702	0.27129	0.328269	0.37787
uniform	2n = 8x*	15	2	PD	0.491017	0.481205	0.233476	0.242971	0.111357	0.0506332	0.00910723	0	0	0	0	0	0.47	0.9885	-0.00464649	0.0435101	-0.000353473	0.00408768	-0.00206401	0.00135706	0.000474352	0.0077009
uniform	2n = 8x*	15	2	FA	0.433126	0.410282	0.212527	0.215574	0.10764	0.0546172	0.189285	0.01	0	0.05	0.06	0.23	0.27	0.3692	0.19887	0.219297	0.108603	0.153907	0.0963303	0.120842	0.127264	0.180327
uniform	2n = 2x	20	2	MM	0.0166211	0.0212419	0.00110994	0.0268876	0.0191616	0.0053654	0.0824891	0.23	0.21	0.17	0.12	0.21	0.17	0.148	0.461376	0.536769	0.329671	0.445296	0.315899	0.343303	0.420833	0.469113
uniform	2n = 2x	20	2	ML	0.0297588	0.042098	0.0496878	0.0262713	0.0475189	0.0727687	0.196276	0.74	0.28	0.16	0.15	0.24	0.39	0.5274	0.460298	0.575436	0.400334	0.494058	0.384254	0.416172	0.469091	0.518236
uniform	2n = 2x	20	2	RI	0.225756	0.392792	0.303196	1.18731	0.388989	0.608081	0.371458	0	0	0.1	0	0.1	0.1	0.016	0.0484238	0.0653012	0.00279415	0.00478255	-0.00131048	0.00689869	-0.00414783	0.0137122
uniform	2n = 2x	20	2	LO	0.0246351	0.0874772	0.010247	0.0538256	0.0394594	0.0660992	0.0891743	0.2	0.3	0.1	0.1	0	0	0.136	0.518552	0.463785	0.360922	0.387369	0.319243	0.401208	0.301007	0.467428
uniform	2n = 2x	20	2	WE	0.00999186	0.00405418	0.0574518	0.00158091	0.00170397	0.00415642	0.0679916	0.1	0	0.2	0.3	0.1	0.1	0.156	0.534431	0.446019	0.373711	0.369444	0.334038	0.412063	0.282099	0.450715
uniform	2n = 2x	20	2	VR	0.0135415	0.0213831	0.000869464	0.0195955	0.019413	0.0135397	0.0966966	0.22	0.17	0.19	0.12	0.22	0.18	0.15	0.461664	0.53217	0.319542	0.43807	0.30602	0.332934	0.413615	0.461893
uniform	2n = 2x	20	2	PD	0.0130713	0.0226173	0.00169337	0.0208945	0.0192034	0.0133852	0.0951927	0.23	0.17	0.19	0.12	0.21	0.17	0.1494	0.462512	0.531806	0.320759	0.437579	0.307229	0.33416	0.413124	0.461404
uniform	2n = 2x	20	2	FA	NA	NA	NA	NA	NA	NA	NA	NA	NA	NA	NA	NA	NA	NA	NA	NA	NA	NA	NA	NA	NA	NA
uniform	2n = 4x	20	2	MM	0.186338	0.245614	0.0163247	0.0489151	0.0646805	0.0154624	0.0839677	0.1	0.04	0.14	0.06	0.11	0.15	0.111	0.157895	0.202885	0.0862759	0.136362	0.0741407	0.0983856	0.111158	0.16139
uniform	2n = 4x	20	2	ML	0.119199	0.150216	0.0798818	0.0397516	0.0663699	0.157584	0.243948	0.08	0.15	0.09	0.13	0.05	0.18	0.476	0.176063	0.204426	0.139158	0.166695	0.121762	0.156468	0.136087	0.196986
uniform	2n = 4x	20	2	RI	0.326182	0.791292	0.818484	0.00792421	2.89089	1.18422	0.0297405	0	0	0	0	0	0	0.022	-0.0925714	-0.0147125	-0.00546163	-0.00106846	-0.00964406	-0.001279	-0.00992881	0.00779206
uniform	2n = 4x	20	2	LO	0.174399	0.167654	0.120601	0.108765	0.143421	0.0660534	0.0983267	0	0	0	0.1	0.1	0.1	0.104	0.152686	0.25519	0.0776799	0.163463	0.0417804	0.113379	0.0879769	0.237083
uniform	2n = 4x	20	2	WE	0.203138	0.181335	0.102369	0.142892	0.120062	0.0373064	0.0805461	0.2	0.1	0	0.2	0.2	0	0.09	0.169134	0.252661	0.0865164	0.158101	0.0506045	0.122205	0.0841837	0.230288
uniform	2n = 4x	20	2	VR	0.00174896	0.00423763	0.00335356	0.0101361	0.0426441	0.0218979	0.0948535	0.19	0.25	0.22	0.23	0.15	0.18	0.1632	0.426046	0.520836	0.294323	0.432995	0.280402	0.30812	0.40805	0.457294
uniform	2n = 4x	20	2	PD	0.431214	0.414756	0.210285	0.21908	0.100576	0.0522797	0.0320404	0	0	0.01	0.01	0.16	0.42	0.6529	0.203826	0.257622	0.0818637	0.136703	0.072785	0.0909289	0.116541	0.156752
uniform	2n = 4x	20	2	FA	0.356195	0.299462	0.196755	0.210125	0.0997476	0.0665063	0.196515	0.03	0.03	0.08	0.06	0.14	0.26	0.3202	0.264717	0.317304	0.162138	0.254297	0.148506	0.175708	0.224965	0.283169
uniform	2n = 6x	20	2	MM	0.398661	0.456119	0.152328	0.15309	0.0746197	0.0494482	0.029551	0.01	0	0.06	0.07	0.06	0.13	0.5292	0.0691726	0.115525	0.0452047	0.0955649	0.0305277	0.0598622	0.0639277	0.12701
uniform	2n = 6x	20	2	ML	0.081385	0.172835	0.110385	0.0439672	0.131966	0.137933	0.237046	0.16	0.07	0.09	0.03	0.14	0.2	0.4734	0.123065	0.18975	0.096368	0.153206	0.0789333	0.113744	0.122776	0.183349
uniform	2n = 6x	20	2	RI	NA	1.31282	1.45858	0.854181	NA	2.55747	NA	0	0	0.1	0	0	0	0.018	NA	NA	NA	NA	NA	NA	NA	NA
uniform	2n = 6x	20	2	LO	0.195162	0.22774	0.00733209	0.00238185	0.0706863	0.00150166	0.0698302	0.2	0	0.3	0	0.2	0.1	0.144	0.0724516	0.206158	0.0340626	0.119553	0.00064618	0.067403	0.0501958	0.187762
uniform	2n = 6x	20	2	WE	0.181136	0.20875	0.0142203	0.0266896	0.105296	0.00998952	0.0526605	0	0	0.2	0	0.2	0	0.144	0.0877246	0.204981	0.0418899	0.114759	0.00799175	0.0756918	0.0477844	0.180706
uniform	2n = 6x	20	2	VR	0.0228096	0.0220093	0.0070186	0.0152108	0.0249378	0.00240672	0.0996808	0.2	0.15	0.22	0.21	0.16	0.23	0.1596	0.426743	0.540744	0.288524	0.43957	0.2749	0.302033	0.415648	0.462883
uniform	2n = 6x	20	2	PD	0.479924	0.477415	0.237189	0.233753	0.111254	0.0508378	0.0148139	0	0	0	0	0.01	0.49	0.9299	0.0904598	0.0825112	0.014575	0.0141013	0.0109435	0.0182061	0.00752615	0.0206753
uniform	2n = 6x	20	2	FA	0.374544	0.363744	0.225576	0.201417	0.103213	0.0790215	0.198131	0	0.01	0.07	0.02	0.24	0.25	0.4058	0.229836	0.268587	0.122205	0.192271	0.110257	0.134118	0.165389	0.218867
uniform	2n = 8x	20	2	MM	0.479414	0.48176	0.23666	0.234945	0.120628	0.0632784	0.0123597	0	0	0.02	0.03	0.06	0.15	0.6955	0.0329174	0.0940244	0.018929	0.0597343	0.00599667	0.031855	0.035318	0.0840793
uniform	2n = 8x	20	2	ML	0.0158286	0.0439135	0.00446251	0.0211389	0.0476567	0.238272	0.343819	0.4	0.2	0	0	0	0.1	0.418	0.104087	0.0645091	0.0561799	0.0392149	0.0178327	0.0943621	-0.0349464	0.112947
uniform	2n = 8x	20	2	RI	0.0460836	0.268289	0.280428	0.366923	0.138683	0.0899139	0.0592122	0.1	0	0.3	0.1	0	0.1	0.042	0.109837	0.138103	0.0376914	0.0568633	0.0134095	0.0619288	0.00700921	0.106435
uniform	2n = 8x	20	2	LO	0.238135	0.236847	0.287923	0.346326	0.0783208	0.0286025	0.105534	0.3	0	0.2	0.1	0	0.2	0.104	0.0775078	0.106301	0.0356266	0.0648288	0.00296213	0.0682152	-0.00927976	0.138229
uniform	2n = 8x	20	2	WE	0.218614	0.288833	0.278294	0.415715	0.0554942	0.0947093	0.0575215	0.2	0.1	0.1	0.1	0	0.3	0.088	0.0859138	0.116584	0.0375671	0.0699449	0.00651241	0.0685494	-0.00287308	0.142025
uniform	2n = 8x	20	2	VR	0.00687519	0.0334724	0.0145726	0.0371945	0.0255604	0.0104462	0.0925841	0.22	0.21	0.13	0.24	0.19	0.21	0.1706	0.419355	0.510552	0.278977	0.411527	0.265513	0.292332	0.386937	0.435533
uniform	2n = 8x	20	2	PD	0.489807	0.488089	0.23828	0.242531	0.116831	0.0554753	0.00925903	0	0	0	0	0	0.32	0.9846	-0.0100703	0.00735552	-0.00069362	0.000396485	-0.0022424	0.000855163	-0.00167625	0.00246922
uniform	2n = 8x	20	2	FA	0.397894	0.396509	0.209173	0.235761	0.113803	0.0598695	0.189735	0.01	0.01	0.06	0.04	0.26	0.29	0.415	0.204724	0.250711	0.10339	0.171532	0.09202	0.114733	0.14568	0.197149
uniform	2n = 4x*	20	2	MM	0.153716	0.132176	0.0201409	0.0359825	0.024237	0.0198851	0.0827069	0.04	0.07	0.08	0.11	0.06	0.13	0.1197	0.184072	0.211253	0.10117	0.139872	0.0890217	0.113289	0.115092	0.164479
uniform	2n = 4x*	20	2	ML	0.106314	0.0959342	0.0350699	0.0497913	0.102533	0.114593	0.242564	0.17	0.17	0.09	0.1	0.07	0.21	0.4678	0.198201	0.231129	0.165043	0.197684	0.146866	0.183108	0.165932	0.229026
uniform	2n = 4x*	20	2	RI	0.76343	0.869951	0.808358	0.942933	2.35184	0.792036	0.306048	0	0	0	0	0	0.1	0.01	0.0823459	-0.0250297	0.00415784	-0.00168495	0.000574485	0.0077411	-0.00989635	0.00652668
uniform	2n = 4x*	20	2	LO	0.159115	0.173664	0.110063	0.00442747	0.1548	0.118346	0.099775	0.1	0.2	0	0.2	0.1	0.1	0.104	0.182165	0.272188	0.10458	0.161848	0.0641551	0.144663	0.0921085	0.230008
uniform	2n = 4x*	20	2	WE	0.167635	0.192263	0.0952855	0.0148027	0.169076	0.134478	0.0827821	0.2	0.1	0	0.1	0	0	0.108	0.211086	0.280809	0.129399	0.165843	0.0866645	0.171658	0.0966983	0.233395
uniform	2n = 4x*	20	2	VR	0.0125395	0.0390347	0.0199835	0.0319816	0.000803625	0.00872978	0.090353	0.12	0.16	0.2	0.21	0.23	0.14	0.1624	0.42916	0.535523	0.299257	0.436296	0.285302	0.313086	0.412188	0.459794
uniform	2n = 4x*	20	2	PD	0.421378	0.392576	0.198078	0.189362	0.100251	0.0429602	0.0305015	0	0	0.07	0.05	0.18	0.35	0.6605	0.230365	0.319002	0.101934	0.194461	0.0919444	0.111902	0.171696	0.217018
uniform	2n = 4x*	20	2	FA	0.364074	0.307631	0.197937	0.170769	0.106173	0.0412169	0.195604	0.02	0.04	0.1	0.11	0.21	0.29	0.3224	0.266111	0.316927	0.163797	0.254609	0.150104	0.177426	0.225215	0.28354
uniform	2n = 6x*	20	2	MM	0.3867	0.401257	0.144017	0.181068	0.0452961	0.0421709	0.027503	0.01	0.01	0.07	0.04	0.14	0.23	0.5902	0.0842856	0.0925492	0.0557241	0.0732419	0.040881	0.0705427	0.0428833	0.103465
uniform	2n = 6x*	20	2	ML	0.104365	0.14896	0.0755292	0.0421373	0.124617	0.129652	0.236264	0.03	0.15	0.09	0.09	0.08	0.19	0.4802	0.186626	0.208617	0.151024	0.177986	0.133281	0.16867	0.146081	0.209521
uniform	2n = 6x*	20	2	RI	NA	1.12785	NA	0.985624	0.25972	NA	NA	0	0	0	0	0	0	0.01	NA	NA	NA	NA	NA	NA	NA	NA
uniform	2n = 6x*	20	2	LO	0.267971	0.171767	0.0103545	0.205578	0.158283	0.0823794	0.0971502	0.1	0.1	0.1	0.1	0	0.1	0.16	0.119909	0.15766	0.0603651	0.112081	0.0247421	0.0958349	0.0262628	0.196259
uniform	2n = 6x*	20	2	WE	0.27012	0.201366	0.0432109	0.215693	0.164474	0.0965357	0.0901971	0.2	0	0.2	0.2	0.1	0.1	0.144	0.131823	0.151346	0.0666074	0.107118	0.0309385	0.102107	0.021545	0.191133
uniform	2n = 6x*	20	2	VR	0.0284906	0.0264639	0.00667604	0.0133817	0.0586522	0.0600395	0.0979929	0.13	0.21	0.16	0.13	0.14	0.22	0.1666	0.417184	0.527102	0.280977	0.424233	0.267307	0.294534	0.400099	0.447779
uniform	2n = 6x*	20	2	PD	0.47849	0.469714	0.228217	0.234813	0.110051	0.0504543	0.0153708	0	0	0	0	0.06	0.5	0.9332	0.0773942	0.113653	0.0128124	0.0220503	0.00908344	0.0165409	0.0145841	0.0295142
uniform	2n = 6x*	20	2	FA	0.412304	0.360588	0.202946	0.223487	0.100567	0.0374921	0.194492	0.01	0.02	0.05	0.06	0.19	0.3	0.4016	0.208659	0.2681	0.110927	0.190179	0.0989732	0.122849	0.163517	0.216564
uniform	2n = 8x*	20	2	MM	0.489795	0.482992	0.237165	0.250745	0.112752	0.0564123	0.0152682	0	0	0.03	0.01	0.03	0.27	0.683	0.033337	0.100344	0.0189011	0.0651208	0.00615023	0.0316459	0.0401844	0.089976
uniform	2n = 8x*	20	2	ML	0.0600226	0.0576137	0.187346	0.00151173	0.299983	0.0890719	0.34879	0.2	0.1	0	0.1	0.1	0.1	0.4	0.0443194	0.204547	0.0239465	0.120961	-0.0145129	0.0623351	0.0492803	0.191402
uniform	2n = 8x*	20	2	RI	0.511276	0.412995	0.127172	0.325419	0.0958851	0.132929	0.0502463	0.1	0	0	0.1	0.1	0	0.05	-0.012907	0.196981	-0.00383683	0.0833564	-0.0249925	0.0173222	0.0327337	0.133552
uniform	2n = 8x*	20	2	LO	0.382944	0.311646	0.147239	0.24521	0.155498	0.158883	0.110018	0	0	0.1	0	0.1	0	0.116	-0.00376437	0.202	-0.00159828	0.133873	-0.0318129	0.0286193	0.0544565	0.211606
uniform	2n = 8x*	20	2	WE	0.427051	0.334951	0.155813	0.25377	0.133493	0.145323	0.127944	0.2	0.1	0	0	0.2	0	0.11	-0.011392	0.211074	-0.00474365	0.132725	-0.0343722	0.0248932	0.0576099	0.206347
uniform	2n = 8x*	20	2	VR	0.0160249	0.0482938	0.0181443	0.0143066	0.0365584	0.0631789	0.0938843	0.21	0.14	0.18	0.13	0.23	0.15	0.175	0.425759	0.516537	0.282686	0.416088	0.269221	0.29604	0.391681	0.439911
uniform	2n = 8x*	20	2	PD	0.493084	0.478648	0.233062	0.242035	0.110535	0.0508221	0.00942546	0	0	0	0	0	0.5	0.9875	0.0266538	0.0776602	0.00216892	0.00670707	0.000338801	0.00399902	0.00338402	0.01003
uniform	2n = 8x*	20	2	FA	0.420516	0.419021	0.216015	0.222872	0.114775	0.0552163	0.189536	0	0	0.06	0.06	0.12	0.26	0.4134	0.209329	0.24234	0.100622	0.162387	0.0897864	0.111434	0.137002	0.187559
uniform	2n = 2x	50	2	MM	0.00118078	0.0192142	0.00967381	0.00680765	0.0097607	0.0161736	0.0864089	0.35	0.38	0.32	0.34	0.29	0.28	0.2412	0.641488	0.716451	0.520491	0.675143	0.507497	0.533249	0.655926	0.693486
uniform	2n = 2x	50	2	ML	0.0246224	0.00497476	0.0460375	0.030096	0.0251182	0.053833	0.154503	0.79	0.49	0.3	0.3	0.21	0.38	0.573	0.674502	0.768041	0.643481	0.74316	0.630911	0.655713	0.726301	0.759125
uniform	2n = 2x	50	2	RI	0.602865	0.0351404	1.34117	0.694303	0.753258	0.691791	0.143583	0	0	0	0	0	0	0.02	0.121417	-0.0448097	0.0133586	-0.00652011	0.00558374	0.0211319	-0.0242547	0.0112186
uniform	2n = 2x	50	2	LO	0.129077	0.0111639	0.00157501	0.0562911	0.00438712	0.00976387	0.0972612	0.1	0.1	0.2	0.4	0.2	0.3	0.256	0.625953	0.77028	0.493604	0.710624	0.450673	0.534257	0.655677	0.758083
uniform	2n = 2x	50	2	WE	0.0833293	0.0416909	0.0383465	0.00785161	0.0337185	0.0417865	0.0622105	0.1	0.2	0.3	0.5	0.5	0.2	0.266	0.642759	0.756952	0.55767	0.685934	0.517068	0.595768	0.627622	0.736593
uniform	2n = 2x	50	2	VR	0.00412918	0.00593972	0.00953394	0.0204606	0.00181452	0.00182539	0.100528	0.29	0.39	0.31	0.19	0.31	0.26	0.2404	0.632121	0.689154	0.493125	0.64732	0.479999	0.506031	0.626921	0.666833
uniform	2n = 2x	50	2	PD	0.00381937	0.00727817	0.010052	0.0203852	0.00163161	0.00232431	0.0991504	0.27	0.39	0.3	0.19	0.3	0.26	0.2454	0.633728	0.688664	0.495762	0.646744	0.482653	0.508649	0.626323	0.666279
uniform	2n = 2x	50	2	FA	NA	NA	NA	NA	NA	NA	NA	NA	NA	NA	NA	NA	NA	NA	NA	NA	NA	NA	NA	NA	NA	NA
uniform	2n = 4x	50	2	MM	0.152772	0.191055	0.031648	0.0521014	0.0567419	0.00424457	0.0959622	0.03	0.08	0.02	0.07	0.05	0.06	0.0631	0.200124	0.237468	0.117307	0.172384	0.104398	0.130176	0.145474	0.199039
uniform	2n = 4x	50	2	ML	0.118246	0.16	0.0780541	0.00228727	0.0463123	0.0990894	0.225557	0.08	0.17	0.04	0.03	0.02	0.16	0.4618	0.214885	0.237467	0.187196	0.212269	0.168314	0.20594	0.179239	0.24482
uniform	2n = 4x	50	2	RI	0.802211	1.96566	0.270705	0.714934	0.471642	0.252341	0.0767859	0	0	0	0	0	0	0.018	-0.076022	0.0133425	-0.00724234	0.00146482	-0.0140043	-0.000479751	-0.0119297	0.0148589
uniform	2n = 4x	50	2	LO	0.184014	0.31847	0.0271532	0.19887	0.0429202	0.0382821	0.101408	0.1	0	0.1	0.1	0	0	0.046	0.262099	0.213476	0.151949	0.16652	0.111844	0.191559	0.073528	0.25664
uniform	2n = 4x	50	2	WE	0.189943	0.340776	0.0174771	0.210624	0.0402123	0.0468157	0.0841704	0.1	0	0.1	0.2	0	0	0.052	0.277446	0.214398	0.16664	0.164055	0.125635	0.207077	0.0728219	0.252565
uniform	2n = 4x	50	2	VR	0.00727843	0.0108653	0.00622631	0.00149159	0.00507054	0.0175096	0.0946112	0.27	0.28	0.26	0.22	0.27	0.24	0.2494	0.60839	0.714347	0.463891	0.663146	0.450577	0.476998	0.64391	0.681545
uniform	2n = 4x	50	2	PD	0.427172	0.423933	0.213034	0.212398	0.0966626	0.0494703	0.0304244	0	0	0	0	0.11	0.47	0.7551	0.34523	0.401054	0.107653	0.160517	0.100527	0.114769	0.14548	0.175479
uniform	2n = 4x	50	2	FA	0.351225	0.314185	0.200574	0.189353	0.102889	0.0519164	0.196022	0	0.03	0.04	0.05	0.27	0.37	0.4658	0.420009	0.476866	0.214481	0.319544	0.203165	0.225738	0.295986	0.342714
uniform	2n = 6x	50	2	MM	0.362042	0.392704	0.0776787	0.138363	0.0537439	0.0349468	0.0394969	0.02	0.03	0.1	0.03	0.19	0.2	0.4451	0.102516	0.164166	0.066147	0.134464	0.0516842	0.080582	0.103383	0.165283
uniform	2n = 6x	50	2	ML	0.0940346	0.183733	0.120129	0.00158886	0.104235	0.113911	0.203816	0.18	0.07	0.05	0.11	0.16	0.25	0.5098	0.192104	0.288268	0.16803	0.262403	0.14894	0.186994	0.229603	0.294608
uniform	2n = 6x	50	2	RI	NA	NA	NA	NA	NA	NA	NA	0	NA	0	NA	NA	0.1	NA	NA	NA	NA	NA	NA	NA	NA	NA
uniform	2n = 6x	50	2	LO	0.211024	0.386076	0.106202	0.0786589	0.00394977	0.160605	0.0808743	0.2	0.1	0.3	0.2	0.2	0.3	0.188	0.0978196	0.16904	0.0462914	0.09768	0.0127094	0.0797691	0.0279678	0.166447
uniform	2n = 6x	50	2	WE	0.238498	0.387907	0.11797	0.112703	0.0070114	0.164114	0.0596376	0	0	0.3	0.2	0	0.3	0.198	0.112743	0.165869	0.0549707	0.0937286	0.020443	0.0893674	0.0255057	0.161082
uniform	2n = 6x	50	2	VR	0.00244587	0.0284654	0.010802	0.0122211	0.00413331	0.0134814	0.091725	0.2	0.26	0.22	0.22	0.24	0.21	0.2572	0.595065	0.691991	0.448928	0.650859	0.435478	0.462178	0.63047	0.67035
uniform	2n = 6x	50	2	PD	0.480955	0.479147	0.233433	0.234236	0.110174	0.0502015	0.0144274	0	0	0	0	0.01	0.47	0.9452	0.108569	0.181214	0.0110095	0.0195359	0.00872128	0.0132977	0.015379	0.0236922
uniform	2n = 6x	50	2	FA	0.401161	0.388736	0.212505	0.221958	0.10418	0.0610023	0.194301	0.02	0	0.02	0	0.15	0.38	0.5678	0.349167	0.407466	0.143492	0.22491	0.134188	0.15277	0.204443	0.245181
uniform	2n = 8x	50	2	MM	0.473597	0.450836	0.245743	0.2479	0.11751	0.0661284	0.0210626	0	0	0.01	0.01	0.08	0.21	0.6194	0.069475	0.119369	0.0427017	0.084927	0.0288815	0.0565055	0.0576352	0.112092
uniform	2n = 8x	50	2	ML	0.0046002	0.181165	0.0110938	0.00812125	0.242076	0.232182	0.340024	0.1	0.1	0	0	0	0.1	0.412	0.112805	0.135692	0.0643398	0.0853069	0.0238499	0.104619	0.0087467	0.160873
uniform	2n = 8x	50	2	RI	0.148617	0.492219	0.20163	0.313106	0.145172	0.0407412	0.0996014	0	0.1	0	0.1	0.2	0	0.078	0.0921043	0.0920764	0.0310952	0.0454388	0.00715949	0.0549954	-0.0146606	0.105211
uniform	2n = 8x	50	2	LO	0.224327	0.369487	0.227972	0.31481	0.0533404	0.00748109	0.111725	0.2	0	0.1	0	0.1	0.2	0.088	0.0968621	0.0685738	0.0448001	0.0471493	0.0119749	0.0775288	-0.0366381	0.130278
uniform	2n = 8x	50	2	WE	0.180557	0.370632	0.217617	0.296923	0.0900065	0.018257	0.0799564	0.1	0.1	0	0	0	0.3	0.066	0.10488	0.0786832	0.0469011	0.0525406	0.0151856	0.0785223	-0.0288146	0.133204
uniform	2n = 8x	50	2	VR	0.0258914	0.00123136	0.0180963	0.00755443	0.0188991	0.0150748	0.0963694	0.26	0.27	0.29	0.23	0.25	0.26	0.2632	0.59647	0.660419	0.445043	0.620125	0.431631	0.458259	0.598344	0.64099
uniform	2n = 8x	50	2	PD	0.4898	0.488827	0.237755	0.242085	0.117198	0.0555928	0.00925741	0	0	0	0	0	0.31	0.9923	-0.0134046	0.0346893	-0.000472207	0.00152741	-0.00126435	0.000319935	-0.000165942	0.00322076
uniform	2n = 8x	50	2	FA	0.401339	0.414413	0.219846	0.215844	0.111306	0.0547603	0.190952	0	0	0.01	0.02	0.16	0.33	0.5916	0.325707	0.371664	0.117607	0.19586	0.10939	0.125808	0.176122	0.21544
uniform	2n = 4x*	50	2	MM	0.169856	0.155053	0.0492956	0.0955754	0.0333854	0.0707455	0.0899471	0.1	0.08	0.06	0.08	0.07	0.04	0.0591	0.218187	0.2567	0.128964	0.18818	0.115978	0.141906	0.16116	0.21492
uniform	2n = 4x*	50	2	ML	0.127948	0.135733	0.00410362	0.0169061	0.0471191	0.0718528	0.222998	0.12	0.21	0.08	0.07	0.04	0.19	0.4602	0.235178	0.282272	0.215923	0.262913	0.196245	0.235428	0.229303	0.295897
uniform	2n = 4x*	50	2	RI	0.203234	0.533996	1.06406	0.359586	0.589042	0.936626	0.16686	0	0	0	0	0.1	0.1	0.014	-0.140991	0.0130413	-0.0143355	0.00162141	-0.0215404	-0.00712901	-0.0135474	0.0167895
uniform	2n = 4x*	50	2	LO	0.115158	0.0107136	0.199398	0.122134	0.104939	0.157929	0.0912896	0	0	0.1	0.1	0	0.1	0.064	0.202953	0.363194	0.120425	0.265231	0.0786935	0.161735	0.182588	0.344152
uniform	2n = 4x*	50	2	WE	0.127267	0.0242819	0.176642	0.129211	0.128247	0.176205	0.0877311	0	0.2	0.1	0.1	0	0.1	0.054	0.224444	0.358287	0.140942	0.254581	0.0971662	0.184173	0.173779	0.331978
uniform	2n = 4x*	50	2	VR	0.0106228	0.00688976	0.00858382	0.0142596	0.0184821	0.00222136	0.0958956	0.3	0.19	0.28	0.37	0.25	0.24	0.2652	0.612046	0.702123	0.467209	0.657457	0.453903	0.480307	0.637701	0.676348
uniform	2n = 4x*	50	2	PD	0.418388	0.399702	0.205124	0.200995	0.100075	0.0516374	0.0334284	0	0	0	0	0.14	0.46	0.7391	0.35162	0.452944	0.116563	0.201298	0.108998	0.124113	0.184894	0.217591
uniform	2n = 4x*	50	2	FA	0.347181	0.321217	0.193119	0.185982	0.1099	0.0645359	0.197141	0.02	0	0.02	0.04	0.21	0.34	0.4718	0.404851	0.487992	0.201552	0.339156	0.19047	0.212582	0.315114	0.362764
uniform	2n = 6x*	50	2	MM	0.35919	0.36634	0.107161	0.16767	0.065892	0.0191895	0.0405806	0	0.02	0.1	0.06	0.19	0.3	0.4897	0.103852	0.135512	0.070011	0.108155	0.054896	0.085094	0.0776756	0.138432
uniform	2n = 6x*	50	2	ML	0.108484	0.178242	0.0523395	0.0094483	0.0793021	0.0969821	0.207413	0.1	0.1	0.17	0.14	0.14	0.18	0.4862	0.230182	0.321906	0.211428	0.303715	0.191701	0.230985	0.270487	0.33622
uniform	2n = 6x*	50	2	RI	NA	NA	NA	NA	NA	NA	NA	0	0	0	0	0.1	0	NA	NA	NA	NA	NA	NA	NA	NA	NA
uniform	2n = 6x*	50	2	LO	0.247071	0.10148	0.0450881	0.209291	0.0440246	0.14748	0.103196	0.2	0	0.2	0.3	0.1	0.1	0.248	0.0822721	0.253743	0.0454804	0.180112	0.00620176	0.084619	0.0959013	0.261763
uniform	2n = 6x*	50	2	WE	0.268011	0.128287	0.0799376	0.228281	0.069878	0.123576	0.0872692	0.2	0.1	0.3	0.2	0.1	0.2	0.258	0.0952357	0.244328	0.0538654	0.169901	0.0137414	0.0938162	0.0870471	0.25042
uniform	2n = 6x*	50	2	VR	0.00489605	0.00394933	0.0236162	0.00726254	0.0259482	0.00899508	0.0922538	0.23	0.27	0.28	0.26	0.28	0.29	0.2706	0.594918	0.689784	0.456517	0.648629	0.443067	0.469762	0.628227	0.668139
uniform	2n = 6x*	50	2	PD	0.477481	0.476892	0.23016	0.23894	0.108783	0.0518604	0.0146748	0	0	0	0	0.03	0.52	0.9491	0.149132	0.196852	0.0175076	0.0241103	0.0148505	0.0201644	0.0193878	0.0288318
uniform	2n = 6x*	50	2	FA	0.393695	0.374188	0.205255	0.210244	0.0990895	0.0539675	0.192477	0	0.01	0.03	0.01	0.23	0.36	0.5898	0.340558	0.383267	0.137923	0.21521	0.128746	0.147076	0.194339	0.235886
uniform	2n = 8x*	50	2	MM	0.483732	0.472116	0.241523	0.243269	0.107168	0.0702895	0.0244772	0	0	0.01	0.03	0.06	0.31	0.6255	0.0424614	0.0767418	0.0262042	0.0550195	0.0123262	0.040072	0.027466	0.0824893
uniform	2n = 8x*	50	2	ML	0.159028	0.126146	0.0890266	0.105833	0.231538	0.0965583	0.343325	0.2	0.1	0	0	0	0	0.4	0.0422937	0.145256	0.0254706	0.0875132	-0.0173921	0.0682399	0.014097	0.159991
uniform	2n = 8x*	50	2	RI	0.41567	0.35405	0.246502	0.205943	0.0819531	0.208368	0.104975	0.1	0.1	0	0	0	0	0.064	0.0205156	0.163514	0.00770008	0.0844245	-0.0190121	0.0344012	0.0222015	0.145996
uniform	2n = 8x*	50	2	LO	0.376255	0.391492	0.226333	0.162279	0.0673696	0.143973	0.112972	0	0.1	0.2	0.2	0.3	0	0.102	-0.0062758	0.184054	-0.00278536	0.131247	-0.034367	0.0288018	0.0454748	0.215098
uniform	2n = 8x*	50	2	WE	0.449827	0.389333	0.241914	0.226735	0.0381198	0.164099	0.0918947	0.1	0	0.1	0.1	0.2	0	0.098	0.00838687	0.19835	0.00373342	0.13833	-0.0279484	0.0354078	0.0546717	0.220061
uniform	2n = 8x*	50	2	VR	0.00290435	0.0178576	0.00066898	0.00464695	0.00350472	0.00207504	0.0915165	0.3	0.28	0.29	0.26	0.32	0.23	0.252	0.611173	0.710832	0.467153	0.656397	0.453944	0.480157	0.637119	0.674854
uniform	2n = 8x*	50	2	PD	0.492589	0.480081	0.233532	0.243166	0.111793	0.0521019	0.00928898	0	0	0	0	0	0.39	0.9933	0.0390336	0.0688646	0.00193156	0.0032704	0.000818351	0.00304476	0.0014433	0.00509748
uniform	2n = 8x*	50	2	FA	0.404296	0.402461	0.21342	0.208932	0.118273	0.0605172	0.189555	0	0	0	0.03	0.16	0.33	0.5982	0.320941	0.395381	0.117943	0.201935	0.109589	0.126279	0.182839	0.220878
uniform	2n = 2x	100	2	MM	0.0026551	0.00292317	0.00140963	0.00786221	0.00319082	0.00315344	0.0902691	0.61	0.53	0.37	0.44	0.44	0.35	0.3392	0.771822	0.829051	0.659986	0.804883	0.649294	0.670417	0.791897	0.817141
uniform	2n = 2x	100	2	ML	0.0190593	0.00726418	0.012482	0.0055072	0.0179603	0.0225008	0.137842	0.83	0.53	0.38	0.42	0.39	0.48	0.6152	0.796468	0.865924	0.742608	0.858491	0.733074	0.75185	0.848281	0.868062
uniform	2n = 2x	100	2	RI	0.483245	0.215289	0.321273	0.319941	0.0381004	0.300292	0.395282	0	0	0	0	0	0	0.018	0.00620781	0.214978	0.000820329	0.0458497	-0.00858656	0.0102271	0.020436	0.0712042
uniform	2n = 2x	100	2	LO	0.0132549	0.0293249	0.0162323	0.00294711	0.00521389	0.00884417	0.0980657	0.5	0.5	0.4	0.5	0.4	0.3	0.356	0.727982	0.83135	0.571167	0.805296	0.532571	0.607392	0.76183	0.841544
uniform	2n = 2x	100	2	WE	0.019794	0.0526231	0.0426897	0.0293894	0.0235619	0.0192193	0.0600143	0.5	0.5	0.3	0.4	0.3	0.3	0.3	0.752617	0.82827	0.685782	0.77999	0.652434	0.71648	0.733148	0.819467
uniform	2n = 2x	100	2	VR	0.0160229	0.0127958	0.00411692	0.00154234	0.00757042	0.00733749	0.098141	0.4	0.36	0.31	0.39	0.37	0.47	0.3414	0.734823	0.824634	0.582723	0.800002	0.570918	0.594288	0.786873	0.812408
uniform	2n = 2x	100	2	PD	0.0162765	0.0132207	0.00449333	0.00103189	0.00751211	0.00698424	0.0966898	0.39	0.36	0.3	0.37	0.38	0.47	0.3412	0.73627	0.824596	0.585579	0.799766	0.573804	0.597113	0.78663	0.812178
uniform	2n = 2x	100	2	FA	NA	NA	NA	NA	NA	NA	NA	NA	NA	NA	NA	NA	NA	NA	NA	NA	NA	NA	NA	NA	NA	NA
uniform	2n = 4x	100	2	MM	0.173067	0.21146	0.00607897	0.0658185	0.061199	0.0426486	0.0919568	0.16	0.13	0	0.04	0.02	0.05	0.0274	0.206918	0.267306	0.125551	0.202123	0.112198	0.138858	0.17441	0.229515
uniform	2n = 4x	100	2	ML	0.138385	0.181825	0.040439	0.0139718	0.0356879	0.0956329	0.218954	0.08	0.18	0.01	0.04	0.02	0.15	0.45	0.204298	0.2589	0.186067	0.239723	0.166285	0.2057	0.205896	0.272978
uniform	2n = 4x	100	2	RI	0.19057	0.136395	0.0870871	0.0276962	0.874789	0.747724	0.26958	0.2	0	0	0	0.1	0.1	0.044	-0.0478353	-0.0117584	-0.00492216	-0.00198332	-0.0122449	0.00240111	-0.0225601	0.0185951
uniform	2n = 4x	100	2	LO	0.155041	0.295347	0.0240833	0.11474	0.0603663	0.079073	0.0988862	0.2	0	0	0.1	0.1	0	0.02	0.198964	0.216827	0.11398	0.166525	0.0737417	0.153849	0.0750259	0.255243
uniform	2n = 4x	100	2	WE	0.164671	0.316917	0.0195228	0.136633	0.052103	0.0995996	0.0796419	0	0.1	0	0.1	0	0	0.028	0.224936	0.211465	0.13538	0.159538	0.0935313	0.176751	0.0695211	0.246979
uniform	2n = 4x	100	2	VR	0.0145883	0.0127032	0.0108116	0.00375758	0.00554892	0.00664708	0.0955566	0.36	0.34	0.29	0.42	0.45	0.34	0.3398	0.731165	0.802918	0.581646	0.787234	0.569829	0.593223	0.772889	0.800774
uniform	2n = 4x	100	2	PD	0.433105	0.426788	0.213136	0.211692	0.0999637	0.0478994	0.0317629	0	0	0	0	0.09	0.54	0.8386	0.450332	0.52493	0.107846	0.162817	0.10228	0.113405	0.151253	0.174336
uniform	2n = 4x	100	2	FA	0.371662	0.327038	0.193244	0.192464	0.0958827	0.0580979	0.197328	0	0	0.01	0.02	0.19	0.46	0.6046	0.525762	0.589605	0.225784	0.339998	0.21623	0.235294	0.320346	0.359358
uniform	2n = 6x	100	2	MM	0.376097	0.387856	0.0889836	0.114614	0.0783155	0.0168642	0.040922	0.02	0.03	0.03	0.05	0.14	0.24	0.4861	0.109561	0.173642	0.0718669	0.141089	0.0571714	0.0865312	0.110285	0.171622
uniform	2n = 6x	100	2	ML	0.0980731	0.19263	0.108421	0.00935488	0.0769959	0.110746	0.188789	0.12	0.07	0.17	0.2	0.16	0.22	0.5304	0.225043	0.322114	0.204638	0.307385	0.185057	0.224056	0.273891	0.340135
uniform	2n = 6x	100	2	RI	NA	NA	NA	NA	NA	NA	NA	NA	NA	NA	0	NA	0	NA	NA	NA	NA	NA	NA	NA	NA	NA
uniform	2n = 6x	100	2	LO	0.101764	0.321905	0.0745098	0.0551128	0.0854639	0.0356134	0.0785177	0	0	0.4	0.2	0.4	0.4	0.286	0.114757	0.139566	0.0535484	0.0754797	0.0204858	0.0864939	0.00998444	0.14033
uniform	2n = 6x	100	2	WE	0.141648	0.350598	0.103406	0.0928047	0.0636549	0.0552305	0.0509953	0.1	0	0.4	0.4	0.6	0.3	0.242	0.132488	0.135023	0.0637171	0.0714635	0.0297427	0.0975444	0.00734943	0.134992
uniform	2n = 6x	100	2	VR	0.0100103	0.0140107	0.0238908	0.00844484	0.00393515	0.00428495	0.0967247	0.28	0.32	0.41	0.49	0.39	0.39	0.3372	0.727752	0.789338	0.57483	0.767394	0.562949	0.586473	0.752072	0.781887
uniform	2n = 6x	100	2	PD	0.484473	0.478175	0.23447	0.234831	0.109963	0.0498563	0.014798	0	0	0	0	0	0.48	0.9384	0.14024	0.195687	0.0101266	0.0149247	0.0084932	0.01176	0.0119816	0.0178676
uniform	2n = 6x	100	2	FA	0.405244	0.388157	0.212797	0.213542	0.115372	0.0629442	0.195566	0	0	0.02	0.01	0.09	0.33	0.7186	0.458599	0.525939	0.147388	0.233938	0.140017	0.154742	0.217599	0.250146
uniform	2n = 8x	100	2	MM	0.469515	0.440144	0.243964	0.235012	0.111714	0.0621973	0.0292704	0.02	0	0.02	0.03	0.1	0.22	0.6094	0.0752771	0.10041	0.0476701	0.0740793	0.0334352	0.0618857	0.0457596	0.10228
uniform	2n = 8x	100	2	ML	0.0296363	0.0972031	0.00511317	0.0817533	0.149178	0.260907	0.340089	0.3	0.1	0	0.1	0.1	0.1	0.41	0.0715966	0.139405	0.0397004	0.0886938	0.000252233	0.0790252	0.0112322	0.165097
uniform	2n = 8x	100	2	RI	0.0136679	0.475391	0.241816	0.535473	0.111735	0.2835	0.15069	0.3	0	0	0	0	0.1	0.028	0.121326	0.117401	0.0389208	0.0483149	0.016241	0.0615606	-0.00175649	0.0981446
uniform	2n = 8x	100	2	LO	0.236093	0.368687	0.215696	0.294774	0.0368589	0.0153962	0.117548	0.1	0.1	0.2	0.1	0.3	0.1	0.058	0.0807744	0.110155	0.0370797	0.0748043	0.00446468	0.069616	-0.00776198	0.156358
uniform	2n = 8x	100	2	WE	0.205192	0.409701	0.225187	0.299882	0.0355661	0.0501163	0.125509	0.1	0.2	0.1	0.2	0.1	0.2	0.056	0.0952973	0.121366	0.0427964	0.0820013	0.0109353	0.0745708	-0.00015699	0.16306
uniform	2n = 8x	100	2	VR	0.0120698	0.0181718	0.0136951	0.00754617	0.0107243	0.0137298	0.0968611	0.35	0.35	0.39	0.42	0.38	0.34	0.3378	0.716956	0.80031	0.563128	0.784704	0.551031	0.574988	0.77018	0.798414
uniform	2n = 8x	100	2	PD	0.489833	0.489313	0.238344	0.242639	0.117126	0.0552408	0.00914245	0	0	0	0	0	0.35	0.9966	0.0144393	0.0614191	0.000411487	0.00172183	-0.000229337	0.00105231	0.000643386	0.00280028
uniform	2n = 8x	100	2	FA	0.410487	0.399471	0.213767	0.216772	0.114609	0.0648826	0.190868	0	0	0	0	0.03	0.35	0.7328	0.447137	0.518971	0.127547	0.207306	0.12096	0.134122	0.192448	0.22207
uniform	2n = 4x*	100	2	MM	0.135281	0.166331	0.0364038	0.0655983	0.0341889	0.0500056	0.0906627	0.03	0.13	0	0.06	0.01	0.03	0.0274	0.233609	0.265637	0.14452	0.201833	0.130992	0.157995	0.173944	0.229398
uniform	2n = 4x*	100	2	ML	0.109586	0.140258	0.00545242	0.020343	0.0470847	0.0622462	0.217301	0.09	0.21	0.03	0.03	0	0.17	0.4524	0.240645	0.272138	0.22555	0.258709	0.205528	0.245384	0.224298	0.292476
uniform	2n = 4x*	100	2	RI	0.210372	0.55771	0.779969	0.17084	0.135607	0.689043	0.366312	0.1	0	0.1	0.1	0.1	0	0.026	-0.0186871	0.116303	-0.00227935	0.0187904	-0.0109608	0.00640245	-0.000791619	0.038358
uniform	2n = 4x*	100	2	LO	0.159279	0.0307465	0.067093	0.0759108	0.101816	0.0695313	0.096129	0.1	0	0	0	0	0	0.02	0.205126	0.326658	0.118737	0.242665	0.0781652	0.158915	0.157401	0.324339
uniform	2n = 4x*	100	2	WE	0.179055	0.0595511	0.0383786	0.0946117	0.123171	0.089811	0.0731448	0.1	0.1	0	0	0	0	0.012	0.240397	0.333371	0.147493	0.243124	0.105043	0.189406	0.159268	0.323497
uniform	2n = 4x*	100	2	VR	0.000535945	0.000108738	0.00533178	0.00291484	0.0178405	0.0242452	0.097003	0.44	0.3	0.28	0.42	0.39	0.39	0.352	0.733675	0.81344	0.587973	0.793891	0.576192	0.599509	0.780168	0.80685
uniform	2n = 4x*	100	2	PD	0.418415	0.403343	0.205308	0.209647	0.103345	0.0488538	0.0329923	0	0	0	0	0.07	0.52	0.8282	0.480584	0.568793	0.123081	0.192681	0.117135	0.129018	0.180262	0.205038
uniform	2n = 4x*	100	2	FA	0.342177	0.309187	0.199092	0.196376	0.10747	0.055353	0.195981	0	0	0.03	0.02	0.12	0.46	0.6198	0.52236	0.599162	0.219525	0.33984	0.210145	0.228864	0.320542	0.358857
uniform	2n = 6x*	100	2	MM	0.36967	0.367799	0.104994	0.17191	0.0498219	0.0239167	0.0453882	0.01	0.03	0.06	0.01	0.21	0.36	0.5376	0.105206	0.139456	0.0705674	0.113706	0.0555245	0.0855783	0.0825931	0.144598
uniform	2n = 6x*	100	2	ML	0.112969	0.156609	0.0674407	0.00821344	0.093531	0.0853609	0.189451	0.07	0.08	0.19	0.16	0.28	0.36	0.5134	0.271055	0.353067	0.253808	0.345524	0.234069	0.273338	0.312006	0.378184
uniform	2n = 6x*	100	2	RI	NA	NA	NA	NA	NA	NA	NA	0	NA	0	0	0	0	NA	NA	NA	NA	NA	NA	NA	NA	NA
uniform	2n = 6x*	100	2	LO	0.302966	0.0347146	0.0202179	0.186363	0.0356403	0.106552	0.107129	0	0.1	0.4	0.2	0.3	0.3	0.3	0.11881	0.201955	0.0633084	0.152573	0.0255579	0.100879	0.0620068	0.240648
uniform	2n = 6x*	100	2	WE	0.316679	0.0631975	0.00422583	0.201439	0.0598101	0.0810187	0.0854723	0	0	0.5	0.2	0.3	0.4	0.306	0.135137	0.199463	0.0739396	0.147528	0.0352895	0.112369	0.0587399	0.234
uniform	2n = 6x*	100	2	VR	0.0096466	0.0107418	0.0217676	0.0116765	0.00803372	0.0116312	0.096562	0.28	0.37	0.4	0.37	0.33	0.36	0.344	0.729094	0.805743	0.581589	0.779085	0.569785	0.593153	0.76476	0.79264
uniform	2n = 6x*	100	2	PD	0.482529	0.476507	0.231026	0.236744	0.112426	0.0522906	0.0156245	0	0	0	0	0.01	0.48	0.9378	0.186663	0.305566	0.0158426	0.0292076	0.0139142	0.017771	0.0255089	0.0329056
uniform	2n = 6x*	100	2	FA	0.401289	0.387387	0.219766	0.212842	0.1104	0.0564906	0.195311	0	0	0.01	0.03	0.06	0.4	0.7232	0.451364	0.554162	0.146088	0.254368	0.138666	0.153493	0.237716	0.27087
uniform	2n = 8x*	100	2	MM	0.467106	0.467217	0.235467	0.242953	0.112442	0.0714842	0.0301852	0	0	0.01	0.02	0.1	0.24	0.5949	0.0498407	0.0909391	0.0310135	0.0659034	0.017021	0.0449939	0.0380675	0.093637
uniform	2n = 8x*	100	2	ML	0.143401	0.0938944	0.0688351	0.0942701	0.184553	0.0966553	0.329156	0	0.2	0	0	0	0	0.418	0.0665955	0.199135	0.0393165	0.126059	-0.00268784	0.0811823	0.0492416	0.201394
uniform	2n = 8x*	100	2	RI	0.448792	0.343408	0.33268	0.152994	0.0719048	0.34598	0.095201	0.1	0	0	0.2	0	0.1	0.044	0.0524327	0.179494	0.0210006	0.0961362	-0.00747755	0.0494447	0.0317051	0.159772
uniform	2n = 8x*	100	2	LO	0.379917	0.372487	0.220377	0.143517	0.0867325	0.153662	0.10469	0	0.1	0.2	0.1	0.3	0.1	0.07	0.00483182	0.195767	0.00225827	0.144983	-0.0310035	0.035515	0.0559842	0.231696
uniform	2n = 8x*	100	2	WE	0.396694	0.374728	0.233087	0.151657	0.0848287	0.146925	0.0956509	0	0	0.2	0	0.1	0.1	0.086	0.0128783	0.200676	0.00613049	0.146496	-0.0277489	0.0399958	0.058917	0.231837
uniform	2n = 8x*	100	2	VR	0.0200972	0.0163257	0.0263329	0.00273966	0.00948248	0.00244345	0.0954734	0.41	0.44	0.44	0.43	0.4	0.36	0.3668	0.726721	0.803293	0.567002	0.781931	0.555113	0.578658	0.76754	0.795534
uniform	2n = 8x*	100	2	PD	0.492201	0.479567	0.232912	0.242447	0.111102	0.0510714	0.00947691	0	0	0	0	0	0.47	0.9958	0.0229737	0.0801752	0.000755539	0.00245355	1.59384e-05	0.00149514	0.00127595	0.00363115
uniform	2n = 8x*	100	2	FA	0.406504	0.403676	0.214975	0.221314	0.112236	0.0582353	0.190218	0	0	0	0	0.1	0.39	0.7394	0.428835	0.516507	0.120873	0.210514	0.114371	0.127364	0.195377	0.225551
uniform	2n = 2x	500	2	MM	0.00751159	0.0048154	0.00947632	0.00758293	0.00907452	0.00298667	0.0890672	0.93	0.77	0.75	0.76	0.75	0.71	0.6284	0.921964	0.951367	0.786309	0.943278	0.779401	0.793025	0.938959	0.9473
uniform	2n = 2x	500	2	ML	0.00616896	0.0119348	1.75581e-05	0.000793377	0.0011385	0.00937352	0.115562	1	0.79	0.77	0.82	0.8	0.76	0.7814	0.909562	0.959697	0.787204	0.959314	0.780072	0.794131	0.956135	0.962266
uniform	2n = 2x	500	2	RI	0.0199844	0.0286159	0.12724	0.254087	0.3902	0.517027	0.304385	0	0.1	0	0	0	0.2	0.062	0.106322	0.0741223	0.0235591	0.0301093	0.00778806	0.0393184	-0.0193319	0.0794036
uniform	2n = 2x	500	2	LO	0.0300975	0.0215624	0.0270169	0.0101356	0.0302743	0.0360164	0.092991	0.5	0.4	0.7	0.5	0.6	0.6	0.666	0.904285	0.948361	0.697226	0.939634	0.669693	0.722845	0.924003	0.952129
uniform	2n = 2x	500	2	WE	0.0155968	0.0191333	0.0160776	0.0361272	0.0169936	0.0118199	0.0603332	0.8	0.8	0.5	0.4	0.7	0.5	0.486	0.938246	0.951512	0.910538	0.920083	0.898997	0.920815	0.900779	0.935759
uniform	2n = 2x	500	2	VR	0.00784615	0.00339845	0.00289042	0.00205324	0.00267384	0.00192931	0.0967391	0.79	0.72	0.81	0.77	0.79	0.78	0.6316	0.905769	0.949963	0.714665	0.944456	0.706403	0.722733	0.940241	0.948382
uniform	2n = 2x	500	2	PD	0.00820533	0.00359458	0.0029267	0.00247079	0.0025375	0.00162948	0.0953264	0.79	0.73	0.82	0.76	0.8	0.77	0.6308	0.907521	0.949916	0.718715	0.944388	0.710531	0.726704	0.940168	0.948318
uniform	2n = 2x	500	2	FA	NA	NA	NA	NA	NA	NA	NA	NA	NA	NA	NA	NA	NA	NA	NA	NA	NA	NA	NA	NA	NA	NA
uniform	2n = 4x	500	2	MM	0.152023	0.199042	0.0188156	0.0461866	0.0486889	0.00599951	0.0927598	0.02	0.22	0	0	0	0	0	0.226943	0.287878	0.143625	0.225011	0.129763	0.15743	0.196645	0.253001
uniform	2n = 4x	500	2	ML	0.125121	0.183214	0.0362434	0.0122326	0.0295523	0.093435	0.216831	0	0.18	0	0	0	0.15	0.4426	0.220248	0.265268	0.207517	0.24809	0.187206	0.22765	0.214032	0.281545
uniform	2n = 4x	500	2	RI	0.359911	0.34793	0.0841737	0.43608	0.141044	0.140028	0.227198	0	0.2	0.1	0.1	0.1	0	0.048	0.0259615	0.0157502	0.00555306	0.00515064	-0.00967266	0.0207762	-0.0347347	0.0450196
uniform	2n = 4x	500	2	LO	0.189571	0.277123	0.0339515	0.117443	0.0617564	0.0413538	0.0905612	0	0.1	0	0	0	0	0	0.241919	0.248026	0.149666	0.197708	0.106592	0.19218	0.103711	0.288204
uniform	2n = 4x	500	2	WE	0.207573	0.305513	0.0162952	0.149378	0.0460796	0.0709638	0.0782337	0	0.3	0	0.1	0	0	0	0.267285	0.249715	0.175689	0.194587	0.130639	0.220015	0.102677	0.283202
uniform	2n = 4x	500	2	VR	0.000726534	0.00131222	0.00230711	0.00405691	0.00454048	0.00248676	0.096684	0.75	0.74	0.73	0.73	0.76	0.72	0.6292	0.907533	0.948846	0.705995	0.945306	0.697665	0.714133	0.941127	0.949196
uniform	2n = 4x	500	2	PD	0.42997	0.424124	0.213184	0.212326	0.103817	0.0469917	0.031842	0	0	0	0	0	0.54	0.8998	0.724256	0.804492	0.112775	0.170269	0.10895	0.116596	0.162582	0.177935
uniform	2n = 4x	500	2	FA	0.352658	0.321794	0.196224	0.192288	0.104439	0.056056	0.197948	0	0	0	0	0.02	0.4	0.8712	0.790801	0.852644	0.2412	0.369735	0.234297	0.248079	0.356236	0.383079
uniform	2n = 6x	500	2	MM	0.370045	0.38452	0.0741104	0.126636	0.0689206	0.0368858	0.0420837	0	0	0	0	0.13	0.34	0.6507	0.125607	0.175747	0.083948	0.145005	0.0689922	0.0988662	0.113739	0.175985
uniform	2n = 6x	500	2	ML	0.0979282	0.190938	0.108955	0.000546566	0.0861138	0.0870943	0.167744	0	0.04	0.37	0.14	0.35	0.4	0.6024	0.250949	0.37501	0.22948	0.367788	0.209986	0.248791	0.334823	0.399853
uniform	2n = 6x	500	2	RI	NA	NA	NA	NA	NA	NA	NA	NA	NA	NA	NA	NA	NA	NA	NA	NA	NA	NA	NA	NA	NA	NA
uniform	2n = 6x	500	2	LO	0.170655	0.358524	0.0659635	0.0728492	0.0703042	0.0554575	0.0763075	0	0	0.7	0.3	0.7	0.4	0.488	0.113914	0.157084	0.0544901	0.0897973	0.0205887	0.0882663	0.0207378	0.158004
uniform	2n = 6x	500	2	WE	0.194647	0.374102	0.0760257	0.110089	0.0681933	0.0708156	0.0574316	0	0	0.6	0.1	0.7	0.6	0.54	0.129854	0.153311	0.0643524	0.0853535	0.0293256	0.0992214	0.0180695	0.151868
uniform	2n = 6x	500	2	VR	0.00820846	0.00247196	0.00618105	0.00414809	0.00814244	2.80212e-05	0.0961326	0.68	0.67	0.82	0.73	0.72	0.75	0.6406	0.903413	0.948222	0.702224	0.940817	0.693784	0.710472	0.936317	0.945007
uniform	2n = 6x	500	2	PD	0.482153	0.477038	0.234078	0.235003	0.110302	0.0491108	0.0146968	0	0	0	0	0	0.54	0.9227	0.32722	0.489193	0.0126319	0.0191489	0.0117358	0.013528	0.017612	0.0206857
uniform	2n = 6x	500	2	FA	0.387738	0.380735	0.208516	0.211201	0.110386	0.056608	0.195822	0	0	0	0	0.01	0.39	0.893	0.742643	0.812962	0.158385	0.252984	0.153269	0.163492	0.241926	0.263978
uniform	2n = 8x	500	2	MM	0.464331	0.45123	0.247159	0.242243	0.113848	0.0536269	0.0326105	0.02	0	0	0	0.14	0.26	0.5968	0.0771515	0.107323	0.0480317	0.0776136	0.0340353	0.0620093	0.0498591	0.105248
uniform	2n = 8x	500	2	ML	0.0519677	0.150367	0.00954692	0.127186	0.105899	0.312056	0.345798	0.1	0	0	0	0	0.1	0.42	0.108663	0.142155	0.0635553	0.0915326	0.02202	0.104872	0.0131788	0.168769
uniform	2n = 8x	500	2	RI	0.025939	0.468457	0.195529	0.429783	0.037645	0.00506084	0.0872695	0.1	0	0.2	0.2	0	0	0.032	0.137866	0.121501	0.0577565	0.0659574	0.0282248	0.0871875	-8.42757e-05	0.131426
uniform	2n = 8x	500	2	LO	0.225891	0.368193	0.222843	0.310789	0.00296689	0.00673494	0.113383	0.1	0	0.1	0.1	0.2	0.1	0.014	0.0929905	0.104413	0.0434911	0.0721152	0.0102892	0.0765971	-0.0118996	0.155119
uniform	2n = 8x	500	2	WE	0.220831	0.387473	0.227807	0.318314	0.00868687	0.0115716	0.103159	0.3	0	0	0	0.1	0	0.01	0.103151	0.113346	0.0485495	0.0791656	0.0151852	0.0818059	-0.00579029	0.162987
uniform	2n = 8x	500	2	VR	0.00371116	0.00619342	0.00785195	0.000538145	0.00671374	9.66557e-05	0.096235	0.69	0.65	0.64	0.65	0.77	0.73	0.6462	0.906171	0.950873	0.703197	0.946321	0.694811	0.711391	0.942208	0.950149
uniform	2n = 8x	500	2	PD	0.490887	0.488742	0.238275	0.242646	0.117077	0.0553971	0.009132	0	0	0	0	0	0.34	1	0.0403386	0.149912	0.000564417	0.00201928	0.000249639	0.000879196	0.00150003	0.00253853
uniform	2n = 8x	500	2	FA	0.404563	0.398112	0.216008	0.216889	0.113467	0.0572465	0.191568	0	0	0	0	0	0.32	0.8968	0.716404	0.799646	0.127275	0.221742	0.122944	0.1316	0.211664	0.231774
uniform	2n = 4x*	500	2	MM	0.149766	0.177526	0.0475342	0.0654153	0.0295702	0.0646566	0.0911723	0.08	0.21	0	0	0	0	0	0.243767	0.280015	0.155164	0.218866	0.141269	0.168999	0.190365	0.246998
uniform	2n = 4x*	500	2	ML	0.11819	0.162899	0.0265838	0.0304591	0.0392761	0.0594587	0.21615	0.04	0.26	0	0	0	0.13	0.446	0.247777	0.277435	0.238617	0.266586	0.218141	0.258882	0.231924	0.300572
uniform	2n = 4x*	500	2	RI	0.0535312	0.0919474	1.00435	0.415851	0.668181	0.451731	0.303924	0	0	0	0	0	0	0.058	0.00338709	0.127433	0.000620406	0.0481072	-0.0124185	0.0136591	0.0023993	0.0936145
uniform	2n = 4x*	500	2	LO	0.172678	0.0781178	0.108485	0.0937664	0.100569	0.0945937	0.101642	0.2	0.3	0	0	0	0	0	0.234543	0.353984	0.144615	0.27058	0.101564	0.187126	0.183795	0.353179
uniform	2n = 4x*	500	2	WE	0.197977	0.10721	0.0780447	0.124971	0.128797	0.128728	0.0818339	0.1	0.4	0	0	0	0	0	0.273822	0.359583	0.18372	0.268286	0.137748	0.228901	0.18329	0.349302
uniform	2n = 4x*	500	2	VR	0.00874265	0.00256711	0.000921432	0.00621219	0.00800675	0.0150169	0.0944346	0.73	0.68	0.71	0.74	0.68	0.63	0.6428	0.904867	0.948197	0.709813	0.942564	0.701487	0.717945	0.938178	0.946648
uniform	2n = 4x*	500	2	PD	0.421498	0.40077	0.205144	0.204455	0.0964774	0.0438737	0.0328903	0	0	0	0	0.04	0.57	0.8996	0.744066	0.827661	0.132269	0.194241	0.127934	0.136598	0.18588	0.202574
uniform	2n = 4x*	500	2	FA	0.348947	0.311576	0.197559	0.188779	0.0994123	0.0531674	0.196043	0	0	0	0	0.08	0.5	0.8718	0.789133	0.849567	0.239114	0.361956	0.232248	0.245956	0.348556	0.375209
uniform	2n = 6x*	500	2	MM	0.36642	0.367937	0.11359	0.166719	0.0513804	0.0261007	0.0436491	0	0.03	0	0	0.19	0.46	0.6814	0.120117	0.155008	0.0807097	0.125089	0.0656501	0.0957325	0.0943433	0.155596
uniform	2n = 6x*	500	2	ML	0.116913	0.16168	0.0580306	0.0106054	0.0828015	0.0799635	0.168538	0	0.09	0.47	0.17	0.35	0.36	0.5706	0.318395	0.428212	0.292926	0.426695	0.273902	0.311721	0.394875	0.457492
uniform	2n = 6x*	500	2	RI	NA	NA	NA	NA	NA	NA	NA	NA	NA	NA	NA	NA	NA	NA	NA	NA	NA	NA	NA	NA	NA	NA
uniform	2n = 6x*	500	2	LO	0.264177	0.0898726	0.0128715	0.23343	0.054987	0.0610551	0.104381	0.1	0	0.6	0.3	0.3	0.3	0.526	0.102569	0.218698	0.0544461	0.171319	0.0167866	0.0919513	0.0777332	0.261912
uniform	2n = 6x*	500	2	WE	0.287907	0.112418	0.0154219	0.250495	0.0792902	0.0434164	0.0880654	0.1	0	0.5	0.1	0.4	0.4	0.53	0.117429	0.206933	0.0643502	0.15789	0.0255649	0.102942	0.0663718	0.246774
uniform	2n = 6x*	500	2	VR	0.0079527	0.00673371	0.000876249	0.00887631	0.00816366	0.00867402	0.0935238	0.67	0.6	0.74	0.69	0.82	0.77	0.6494	0.905685	0.948571	0.716851	0.944023	0.708624	0.724883	0.939772	0.947982
uniform	2n = 6x*	500	2	PD	0.481394	0.476843	0.230713	0.236714	0.1142	0.0523221	0.0153061	0	0	0	0	0	0.53	0.9207	0.349457	0.51397	0.0154621	0.0233256	0.0144306	0.0164936	0.0215448	0.0251063
uniform	2n = 6x*	500	2	FA	0.395764	0.383163	0.20896	0.215125	0.114408	0.0569215	0.194512	0	0	0	0	0.01	0.39	0.893	0.738891	0.806566	0.15349	0.255149	0.148495	0.158478	0.243975	0.266256
uniform	2n = 8x*	500	2	MM	0.465789	0.461721	0.235297	0.23983	0.104398	0.0703743	0.0283937	0	0	0	0	0.06	0.27	0.5961	0.0626368	0.117502	0.038303	0.083902	0.0245517	0.0520397	0.0565092	0.111169
uniform	2n = 8x*	500	2	ML	0.045253	0.0797747	0.0398702	0.119173	0.226833	0.09417	0.333692	0.1	0.2	0	0	0	0	0.422	0.0511508	0.174704	0.0304217	0.111748	-0.0119056	0.0726402	0.0340561	0.188097
uniform	2n = 8x*	500	2	RI	0.405785	0.359339	0.267182	0.139298	0.0904551	0.240282	0.109212	0.2	0	0.2	0.1	0.1	0	0.034	0.0164769	0.174522	0.00709109	0.0948425	-0.0235386	0.0377075	0.029325	0.159549
uniform	2n = 8x*	500	2	LO	0.36756	0.35675	0.213261	0.140987	0.107972	0.154398	0.106838	0	0	0.2	0.1	0.3	0.1	0.018	-0.00909816	0.193033	-0.00430958	0.136383	-0.0380112	0.0294018	0.0514203	0.219386
uniform	2n = 8x*	500	2	WE	0.389309	0.373449	0.222109	0.151681	0.0923348	0.15898	0.099612	0	0.1	0	0.1	0.2	0.1	0.01	-0.00171778	0.192633	-0.000823873	0.134339	-0.0349529	0.0333071	0.050538	0.216262
uniform	2n = 8x*	500	2	VR	0.0050226	0.0066863	0.00285129	0.0010147	0.00346201	0.00121228	0.0944994	0.71	0.67	0.75	0.78	0.72	0.68	0.6682	0.913438	0.946079	0.723035	0.942112	0.715012	0.730867	0.937698	0.946222
uniform	2n = 8x*	500	2	PD	0.492544	0.479658	0.233315	0.2429	0.111309	0.0519538	0.00953357	0	0	0	0	0	0.42	1	0.054569	0.175544	0.000846689	0.00258107	0.00049748	0.0011959	0.00201373	0.00314842
uniform	2n = 8x*	500	2	FA	0.407165	0.397969	0.212645	0.220308	0.109603	0.0599806	0.190207	0	0	0	0	0.01	0.3	0.8982	0.730297	0.80175	0.129211	0.221862	0.124896	0.13352	0.21179	0.231888
uniform	2n = 2x	1000	2	MM	0.00556626	7.59122e-05	0.00311836	0.0023798	0.0126676	0.0096523	0.0881544	0.99	0.96	0.92	0.95	0.85	0.84	0.745	0.951504	0.975228	0.812245	0.966817	0.806322	0.818004	0.964286	0.96917
uniform	2n = 2x	1000	2	ML	0.00499559	0.00374978	0.0032323	0.00428387	0.0051336	0.000457547	0.110622	1	0.92	0.92	0.95	0.91	0.89	0.846	0.929404	0.976274	0.792728	0.974743	0.786032	0.799238	0.972758	0.976585
uniform	2n = 2x	1000	2	RI	0.214266	0.259719	0.321056	0.430664	0.376613	0.403681	0.254955	0.1	0.2	0	0.2	0.1	0.1	0.074	0.15101	0.173804	0.0321032	0.079376	0.0168965	0.0472951	0.0243985	0.133875
uniform	2n = 2x	1000	2	LO	0.00100081	0.0328834	0.0246313	0.00236207	0.00364734	0.0196503	0.0973475	0.9	0.7	0.9	0.9	1	0.8	0.748	0.939094	0.975855	0.738395	0.970153	0.714441	0.76062	0.962332	0.97637
uniform	2n = 2x	1000	2	WE	0.0351965	0.00748221	0.0168024	0.0385328	0.0357857	0.0244803	0.0645107	0.6	1	0.8	0.6	0.7	0.8	0.606	0.965984	0.978491	0.938581	0.946251	0.931113	0.945262	0.933847	0.956381
uniform	2n = 2x	1000	2	VR	0.00854199	0.00641751	0.00818987	0.00515059	0.00496876	0.00297516	0.0967879	0.95	0.85	0.88	0.89	0.87	0.85	0.7488	0.936115	0.972875	0.7324	0.969261	0.724884	0.739741	0.966873	0.97148
uniform	2n = 2x	1000	2	PD	0.00887085	0.00667237	0.00832161	0.00532024	0.0050253	0.00319641	0.0954067	0.95	0.85	0.88	0.89	0.87	0.85	0.7474	0.937868	0.972845	0.736481	0.969188	0.729052	0.743737	0.966793	0.971412
uniform	2n = 2x	1000	2	FA	NA	NA	NA	NA	NA	NA	NA	NA	NA	NA	NA	NA	NA	NA	NA	NA	NA	NA	NA	NA	NA	NA
uniform	2n = 4x	1000	2	MM	0.156858	0.204699	0.0238722	0.044061	0.0520943	0.0063765	0.0929959	0.01	0.27	0	0	0	0	0	0.23154	0.282714	0.147417	0.221381	0.133491	0.161286	0.192886	0.249502
uniform	2n = 4x	1000	2	ML	0.126487	0.191873	0.0381505	0.0115038	0.0282059	0.0920698	0.21666	0	0.19	0	0	0	0.15	0.4426	0.220595	0.26596	0.208852	0.250653	0.188451	0.229074	0.216372	0.284316
uniform	2n = 4x	1000	2	RI	0.108876	0.0965031	0.510942	0.189963	0.324138	0.370821	0.196646	0.2	0.1	0.1	0.1	0	0.1	0.06	0.0274983	0.131917	0.00721033	0.0625593	-0.0114534	0.025869	0.0051596	0.119548
uniform	2n = 4x	1000	2	LO	0.182029	0.290537	0.0405003	0.108805	0.0406395	0.0524375	0.0941666	0	0.2	0	0	0	0	0	0.257849	0.268022	0.160655	0.217145	0.117418	0.203284	0.122183	0.308167
uniform	2n = 4x	1000	2	WE	0.195505	0.316566	0.0294726	0.133105	0.0245892	0.0793113	0.0760046	0	0.2	0	0	0	0	0	0.285854	0.27001	0.190222	0.213694	0.144908	0.234739	0.120888	0.302797
uniform	2n = 4x	1000	2	VR	0.000685569	0.00113915	0.00552824	0.00122335	0.00743591	0.00123587	0.096224	0.9	0.9	0.87	0.89	0.84	0.87	0.765	0.938594	0.97312	0.73032	0.969186	0.722822	0.737646	0.966786	0.971414
uniform	2n = 4x	1000	2	PD	0.428646	0.422514	0.211257	0.212056	0.103656	0.0468966	0.0320707	0	0	0	0	0	0.54	0.9	0.787762	0.881227	0.110906	0.168636	0.107388	0.114421	0.161733	0.175523
uniform	2n = 4x	1000	2	FA	0.352731	0.314936	0.194783	0.191203	0.104239	0.0551773	0.197872	0	0	0	0	0.02	0.44	0.8986	0.859734	0.906355	0.242604	0.365611	0.236178	0.249009	0.353238	0.377856
uniform	2n = 6x	1000	2	MM	0.369638	0.380601	0.0784862	0.122297	0.0721588	0.0364787	0.0420969	0	0	0	0	0.1	0.34	0.6909	0.123438	0.178121	0.0821724	0.147038	0.0672704	0.0970377	0.115769	0.178015
uniform	2n = 6x	1000	2	ML	0.0945732	0.187569	0.107373	0.00607005	0.0803417	0.0938252	0.164514	0	0.05	0.41	0.12	0.36	0.35	0.624	0.260246	0.380063	0.237418	0.373398	0.21804	0.256609	0.340517	0.405368
uniform	2n = 6x	1000	2	RI	NA	NA	NA	NA	NA	NA	NA	NA	NA	NA	NA	NA	NA	NA	NA	NA	NA	NA	NA	NA	NA	NA
uniform	2n = 6x	1000	2	LO	0.15901	0.367706	0.0763443	0.0807276	0.0562709	0.0848657	0.0770501	0	0	0.9	0.3	0.7	0.6	0.508	0.113016	0.161024	0.0529853	0.0932691	0.0197548	0.086099	0.0233256	0.162304
uniform	2n = 6x	1000	2	WE	0.182948	0.380303	0.0851897	0.109352	0.0555182	0.0903052	0.0577647	0	0	0.9	0.1	0.7	0.6	0.614	0.128115	0.157048	0.0620201	0.0886679	0.0277922	0.0961027	0.0204657	0.156049
uniform	2n = 6x	1000	2	VR	0.00218133	0.00228038	0.00105186	0.001638	0.000678744	0.000403028	0.0952446	0.87	0.79	0.86	0.89	0.86	0.88	0.761	0.941087	0.972996	0.729169	0.968999	0.7217	0.736468	0.966593	0.971234
uniform	2n = 6x	1000	2	PD	0.481586	0.476358	0.233901	0.234625	0.110262	0.0497229	0.014864	0	0	0	0	0	0.49	0.9134	0.368366	0.603298	0.0112545	0.018396	0.0105393	0.0119696	0.0171856	0.0196062
uniform	2n = 6x	1000	2	FA	0.394495	0.377088	0.209983	0.208293	0.109684	0.0564693	0.196099	0	0	0	0	0.01	0.37	0.9	0.826634	0.884852	0.157716	0.252422	0.153057	0.162369	0.242383	0.262406
uniform	2n = 8x	1000	2	MM	0.470055	0.451812	0.246478	0.243314	0.112865	0.0573671	0.0266708	0.02	0	0	0	0.18	0.24	0.5836	0.0831735	0.101763	0.051628	0.0734996	0.0376737	0.0655622	0.0457722	0.101114
uniform	2n = 8x	1000	2	ML	0.0536742	0.159849	0.0143667	0.12541	0.0902005	0.273045	0.347555	0.1	0.1	0	0	0	0.1	0.42	0.0883855	0.114153	0.0502933	0.0728947	0.00983789	0.0905844	-0.0049305	0.149842
uniform	2n = 8x	1000	2	RI	0.0905642	0.434981	0.271475	0.437143	0.00689534	0.087259	0.0978727	0	0.2	0.3	0.1	0	0.3	0.01	0.135466	0.148568	0.0574766	0.0813561	0.0275571	0.0872932	0.0148689	0.147127
uniform	2n = 8x	1000	2	LO	0.243974	0.375607	0.222867	0.318516	0.00295753	0.00139762	0.115763	0.2	0.1	0.1	0.1	0.2	0.1	0.01	0.0987938	0.114436	0.0461855	0.0796192	0.0130127	0.0792568	-0.00494737	0.163055
uniform	2n = 8x	1000	2	WE	0.225936	0.395575	0.21979	0.325408	0.00451355	0.0188568	0.109271	0.3	0.2	0.1	0.1	0.2	0	0	0.110402	0.127108	0.0520006	0.0883722	0.018639	0.0852464	0.00387894	0.171613
uniform	2n = 8x	1000	2	VR	0.00124827	0.00313586	0.00469599	0.00163616	0.00601615	0.00807093	0.0962943	0.84	0.89	0.89	0.89	0.89	0.89	0.7622	0.937242	0.973119	0.726501	0.96928	0.718929	0.733901	0.966887	0.971503
uniform	2n = 8x	1000	2	PD	0.490679	0.488749	0.238406	0.242723	0.117173	0.0554761	0.00907603	0	0	0	0	0	0.32	1	0.0192398	0.218272	0.00019904	0.00205331	-3.36024e-05	0.000431682	0.00168966	0.00241696
uniform	2n = 8x	1000	2	FA	0.409662	0.396789	0.214067	0.21643	0.112847	0.0598785	0.191638	0	0	0	0	0	0.31	0.8998	0.808674	0.875431	0.12917	0.221622	0.125195	0.133142	0.212481	0.230724
uniform	2n = 4x*	1000	2	MM	0.151733	0.172248	0.0467263	0.069877	0.035152	0.0592647	0.0915035	0.03	0.19	0	0	0	0	0	0.242243	0.27942	0.153976	0.220261	0.140091	0.167801	0.191523	0.248622
uniform	2n = 4x*	1000	2	ML	0.122023	0.1602	0.0260868	0.0371372	0.0350173	0.057763	0.216114	0.05	0.21	0	0	0	0.13	0.446	0.241398	0.276209	0.233133	0.266288	0.21254	0.25352	0.231503	0.300394
uniform	2n = 4x*	1000	2	RI	0.0475224	0.0430379	0.320656	0.024709	0.153929	0.236725	0.220964	0	0.1	0	0.3	0	0.2	0.058	-0.0532346	0.026904	-0.0121006	0.00912631	-0.0282712	0.0040764	-0.0322452	0.0504666
uniform	2n = 4x*	1000	2	LO	0.165896	0.0630542	0.102153	0.10495	0.099425	0.0813072	0.102656	0.1	0.1	0	0	0	0	0	0.221653	0.362578	0.136417	0.287781	0.0932981	0.179025	0.198447	0.372374
uniform	2n = 4x*	1000	2	WE	0.184883	0.0834726	0.0766239	0.125442	0.122928	0.106316	0.08337	0.1	0.1	0	0	0	0	0	0.263046	0.370422	0.176051	0.286685	0.129952	0.22139	0.199269	0.369574
uniform	2n = 4x*	1000	2	VR	0.00168688	0.000768936	0.00127094	0.00146375	0.00123077	0.00262423	0.094632	0.85	0.89	0.82	0.85	0.86	0.88	0.7706	0.940332	0.97278	0.739196	0.968322	0.731852	0.746368	0.96587	0.970601
uniform	2n = 4x*	1000	2	PD	0.422737	0.402846	0.202917	0.205996	0.0979871	0.0457004	0.0326511	0	0	0	0	0.06	0.54	0.9	0.816459	0.898974	0.13434	0.201215	0.130268	0.138407	0.193376	0.209027
uniform	2n = 4x*	1000	2	FA	0.352536	0.31434	0.191016	0.190984	0.101925	0.0562527	0.196019	0	0	0	0	0.05	0.4	0.8982	0.860196	0.912588	0.243805	0.37178	0.237361	0.250228	0.359375	0.384053
uniform	2n = 6x*	1000	2	MM	0.361383	0.3616	0.109177	0.166084	0.0572635	0.0245352	0.0444285	0	0	0	0	0.14	0.42	0.7242	0.120856	0.156943	0.0814756	0.125887	0.0663673	0.0965466	0.0953275	0.156209
uniform	2n = 6x*	1000	2	ML	0.118281	0.162318	0.0508232	0.0126854	0.0768212	0.0713618	0.165109	0	0.1	0.53	0.16	0.44	0.45	0.6004	0.322289	0.443809	0.294539	0.442484	0.275647	0.313203	0.411158	0.472767
uniform	2n = 6x*	1000	2	RI	NA	NA	NA	NA	NA	NA	NA	NA	NA	NA	NA	NA	NA	NA	NA	NA	NA	NA	NA	NA	NA	NA
uniform	2n = 6x*	1000	2	LO	0.242525	0.0780002	0.0198594	0.202413	0.0342497	0.0841137	0.101007	0.2	0	0.6	0.5	0.5	0.6	0.58	0.11053	0.20101	0.0603563	0.153711	0.0216366	0.0988953	0.0620053	0.242842
uniform	2n = 6x*	1000	2	WE	0.270471	0.108434	0.0164192	0.221425	0.0661202	0.0611777	0.0836521	0	0	0.8	0.2	0.7	0.7	0.612	0.127763	0.191278	0.0721719	0.143084	0.0322392	0.111875	0.0531355	0.230729
uniform	2n = 6x*	1000	2	VR	0.000178344	0.00156022	0.00329482	0.00170307	8.43133e-05	0.00188079	0.0945181	0.79	0.87	0.83	0.82	0.85	0.84	0.7714	0.937985	0.97135	0.735174	0.968057	0.727733	0.742443	0.965573	0.970363
uniform	2n = 6x*	1000	2	PD	0.482119	0.476381	0.230683	0.236179	0.112976	0.0525432	0.0153256	0	0	0	0	0	0.49	0.9139	0.432991	0.641693	0.015165	0.0238961	0.0143333	0.0159967	0.0224186	0.0253736
uniform	2n = 6x*	1000	2	FA	0.398423	0.382895	0.213347	0.216008	0.113356	0.0623242	0.194157	0	0	0	0	0	0.27	0.8998	0.814731	0.882047	0.153681	0.248805	0.14907	0.158285	0.238869	0.25869
uniform	2n = 8x*	1000	2	MM	0.466586	0.463934	0.238858	0.242831	0.103013	0.0658638	0.0290181	0	0	0	0	0.08	0.28	0.5837	0.0588365	0.121032	0.0358529	0.0865311	0.0221495	0.049543	0.0591101	0.113822
uniform	2n = 8x*	1000	2	ML	0.087677	0.00565898	0.0529743	0.0833503	0.204634	0.096648	0.350654	0	0.2	0	0	0	0	0.42	0.0305059	0.133979	0.0180667	0.0865714	-0.0240869	0.0601562	0.00788864	0.164189
uniform	2n = 8x*	1000	2	RI	0.491135	0.376531	0.314602	0.134804	0.0385371	0.235805	0.112817	0.1	0	0.1	0	0.1	0	0.008	0.0450021	0.171546	0.0187255	0.0973758	-0.0108702	0.0482883	0.0290572	0.164789
uniform	2n = 8x*	1000	2	LO	0.390536	0.34518	0.220248	0.148342	0.126362	0.146305	0.110197	0	0	0.2	0	0.3	0.1	0.008	-0.00484948	0.186576	-0.0022973	0.132163	-0.0360053	0.0314159	0.0469035	0.215511
uniform	2n = 8x*	1000	2	WE	0.417892	0.373751	0.240266	0.160794	0.0938692	0.163893	0.105462	0.1	0	0	0	0.2	0	0	0.00216555	0.190136	0.00103938	0.131894	-0.0331163	0.0351926	0.0484983	0.213464
uniform	2n = 8x*	1000	2	VR	0.00215126	0.00940752	0.00150267	0.000485609	0.00603996	0.00691948	0.0940066	0.85	0.86	0.9	0.86	0.88	0.87	0.7696	0.942296	0.970904	0.740265	0.967425	0.732972	0.747387	0.964896	0.969775
uniform	2n = 8x*	1000	2	PD	0.492844	0.479889	0.23325	0.242678	0.11112	0.051848	0.00941625	0	0	0	0	0	0.43	1	0.107416	0.302735	0.00135085	0.00328232	0.00106705	0.00163466	0.00286112	0.00370351
uniform	2n = 8x*	1000	2	FA	0.412789	0.401183	0.212828	0.217717	0.109718	0.058832	0.190159	0	0	0	0	0	0.32	0.9	0.81146	0.876073	0.130838	0.21687	0.126832	0.13484	0.207867	0.225837
uniform	2n = 2x	5	3	MM	0.0110448	0.00736962	0.0773765	0.0443728	0.0147886	0.0125039	0.084359	0.18	0.07	0.16	0.11	0.03	0.08	0.0914	0.305221	0.352393	0.166538	0.227828	0.154927	0.178102	0.205052	0.250358
uniform	2n = 2x	5	3	ML	0.0455346	0.0221876	0.0351475	0.107712	0.100325	0.144325	0.245295	0.63	0.2	0.06	0.05	0.05	0.28	0.5024	0.326805	0.383732	0.235853	0.270658	0.220707	0.250885	0.245395	0.295553
uniform	2n = 2x	5	3	RI	0.117589	0.00389748	0.0958616	0.0343279	0.00281864	0.000362492	0.0812843	0.2	0.2	0.1	0	0.2	0	0.088	0.39675	0.300013	0.221394	0.194199	0.18554	0.25666	0.119271	0.266927
uniform	2n = 2x	5	3	LO	0.116017	0.065551	0.0314584	0.0847738	0.119225	0.110873	0.0851215	0	0	0.1	0.1	0.2	0.2	0.094	0.43867	0.38437	0.248347	0.271873	0.212826	0.283213	0.193594	0.346713
uniform	2n = 2x	5	3	WE	0.0623467	0.00799936	0.0155746	0.0202373	0.0500785	0.0308599	0.0578347	0.2	0.1	0	0.3	0.1	0.3	0.17	0.443881	0.379935	0.226117	0.259414	0.19405	0.257702	0.182649	0.333035
uniform	2n = 2x	5	3	VR	NA	NA	NA	NA	NA	NA	NA	NA	NA	NA	NA	NA	NA	NA	NA	NA	NA	NA	NA	NA	NA	NA
uniform	2n = 2x	5	3	PD	NA	NA	NA	NA	NA	NA	NA	NA	NA	NA	NA	NA	NA	NA	NA	NA	NA	NA	NA	NA	NA	NA
uniform	2n = 2x	5	3	FA	NA	NA	NA	NA	NA	NA	NA	NA	NA	NA	NA	NA	NA	NA	NA	NA	NA	NA	NA	NA	NA	NA
uniform	2n = 4x	5	3	MM	0.0970568	0.175139	0.0424407	0.0822373	0.0204469	0.0317653	0.0800188	0.13	0.07	0.08	0.08	0.12	0.08	0.091	0.126755	0.177677	0.0600946	0.107459	0.0495159	0.0706598	0.0846273	0.130179
uniform	2n = 4x	5	3	ML	0.0488159	0.0923319	0.0898002	0.0535605	0.158894	0.154175	0.258773	0.28	0.21	0.2	0.12	0.05	0.21	0.4668	0.133382	0.191439	0.0948936	0.147121	0.0790571	0.110682	0.11812	0.175872
uniform	2n = 4x	5	3	RI	0.254942	0.271347	0.233221	0.0909964	0.130214	0.00782704	0.0686111	0	0	0.1	0	0	0.1	0.084	0.0865686	0.147572	0.034784	0.0786856	0.00626006	0.0632514	0.0142839	0.142437
uniform	2n = 4x	5	3	LO	0.267222	0.281636	0.130843	0.101177	0.0514711	0.064003	0.0906255	0	0.3	0	0.2	0.2	0.1	0.094	0.122568	0.258681	0.0569734	0.181091	0.0240196	0.0898036	0.0988272	0.260896
uniform	2n = 4x	5	3	WE	0.329987	0.336202	0.175683	0.123707	0.0221968	0.0305694	0.0857521	0.1	0.2	0.1	0.2	0.2	0.2	0.086	0.148244	0.256614	0.0713528	0.176904	0.0373861	0.105155	0.0958527	0.255625
uniform	2n = 4x	5	3	VR	NA	NA	NA	NA	NA	NA	NA	NA	NA	NA	NA	NA	NA	NA	NA	NA	NA	NA	NA	NA	NA	NA
uniform	2n = 4x	5	3	PD	NA	NA	NA	NA	NA	NA	NA	NA	NA	NA	NA	NA	NA	NA	NA	NA	NA	NA	NA	NA	NA	NA
uniform	2n = 4x	5	3	FA	NA	NA	NA	NA	NA	NA	NA	NA	NA	NA	NA	NA	NA	NA	NA	NA	NA	NA	NA	NA	NA	NA
uniform	2n = 6x	5	3	MM	0.206788	0.272577	0.0488705	0.109302	0.000359627	0.0346545	0.064813	0.07	0.06	0.1	0.17	0.17	0.08	0.1842	0.101699	0.154288	0.0514988	0.0986631	0.0401624	0.062822	0.0743748	0.122834
uniform	2n = 6x	5	3	ML	0.093886	0.121247	0.105022	0.0557758	0.116209	0.181268	0.26617	0.32	0.17	0.08	0.08	0.08	0.18	0.4532	0.121007	0.197279	0.0857667	0.15001	0.0699603	0.10153	0.121351	0.178418
uniform	2n = 6x	5	3	RI	0.0614915	0.371367	0.177714	0.196472	0.398943	0.337684	0.102666	0	0	0.1	0	0	0.1	0.04	0.0731688	0.12757	0.0164982	0.0316679	0.000481358	0.0325065	0.00162023	0.0616585
uniform	2n = 6x	5	3	LO	0.137569	0.100231	0.0715103	0.198705	0.128047	0.0649686	0.118514	0.1	0.1	0.3	0	0.1	0.1	0.096	0.178587	0.240776	0.100265	0.128485	0.0608722	0.139345	0.0650564	0.190879
uniform	2n = 6x	5	3	WE	0.168095	0.122228	0.0386843	0.256372	0.149642	0.0162322	0.102064	0	0	0.1	0.1	0	0	0.102	0.188564	0.251068	0.104777	0.132356	0.0659508	0.143286	0.0696934	0.193978
uniform	2n = 6x	5	3	VR	NA	NA	NA	NA	NA	NA	NA	NA	NA	NA	NA	NA	NA	NA	NA	NA	NA	NA	NA	NA	NA	NA
uniform	2n = 6x	5	3	PD	NA	NA	NA	NA	NA	NA	NA	NA	NA	NA	NA	NA	NA	NA	NA	NA	NA	NA	NA	NA	NA	NA
uniform	2n = 6x	5	3	FA	NA	NA	NA	NA	NA	NA	NA	NA	NA	NA	NA	NA	NA	NA	NA	NA	NA	NA	NA	NA	NA	NA
uniform	2n = 8x	5	3	MM	0.431646	0.407519	0.217805	0.164265	0.127889	0.0709196	0.0440224	0.01	0.01	0.09	0.08	0.12	0.11	0.4482	0.0573935	0.0985899	0.0354233	0.0752654	0.0215589	0.0492741	0.0460342	0.104368
uniform	2n = 8x	5	3	ML	0.00330282	0.26053	0.0413222	0.11778	0.0632298	0.175834	0.304443	0	0	0	0.1	0.3	0.2	0.46	0.0684158	0.0910553	0.0405889	0.0563374	-0.00160111	0.0826347	-0.0191106	0.131147
uniform	2n = 8x	5	3	RI	0.17703	0.360494	0.289898	0.0542322	0.124982	0.224603	0.0960145	0.1	0	0.2	0.1	0.2	0	0.052	0.0314013	0.126749	0.0114041	0.062813	-0.014442	0.037235	0.00273293	0.122441
uniform	2n = 8x	5	3	LO	0.242295	0.477322	0.205822	0.00443534	0.162622	0.191189	0.0820383	0	0.1	0.1	0.2	0.2	0.1	0.088	0.072931	0.121505	0.0327749	0.081482	0.000829093	0.0646538	3.26241e-05	0.161857
uniform	2n = 8x	5	3	WE	0.338028	0.378359	0.163861	0.0787906	0.10024	0.10743	0.0537913	0.2	0.1	0.1	0.1	0.2	0.1	0.092	0.0727008	0.110837	0.0310928	0.0668446	0.000700706	0.0614275	-0.00654519	0.139518
uniform	2n = 8x	5	3	VR	NA	NA	NA	NA	NA	NA	NA	NA	NA	NA	NA	NA	NA	NA	NA	NA	NA	NA	NA	NA	NA	NA
uniform	2n = 8x	5	3	PD	NA	NA	NA	NA	NA	NA	NA	NA	NA	NA	NA	NA	NA	NA	NA	NA	NA	NA	NA	NA	NA	NA
uniform	2n = 8x	5	3	FA	NA	NA	NA	NA	NA	NA	NA	NA	NA	NA	NA	NA	NA	NA	NA	NA	NA	NA	NA	NA	NA	NA
uniform	2n = 4x*	5	3	MM	0.120206	0.218836	0.0124474	0.101217	0.028963	0.0351746	0.106939	0.06	0.1	0.09	0.09	0.13	0.07	0.0871	0.16011	0.227428	0.080284	0.137922	0.0691527	0.0913954	0.115311	0.16039
uniform	2n = 4x*	5	3	ML	0.0741525	0.137222	0.0841148	0.0235095	0.14357	0.172434	0.274132	0.2	0.22	0.2	0.17	0.08	0.16	0.4458	0.152219	0.24615	0.112014	0.192231	0.0956986	0.12827	0.1632	0.220929
uniform	2n = 4x*	5	3	RI	0.0324079	0.109988	0.0339591	0.00665572	0.0544907	0.302632	0.0752457	0	0.1	0.1	0.1	0	0.2	0.054	0.10586	0.240871	0.0485025	0.128862	0.0160582	0.0808447	0.0651576	0.191521
uniform	2n = 4x*	5	3	LO	0.0550826	0.165406	0.157824	0.0696599	0.0912767	0.210286	0.117382	0.1	0.2	0.2	0.1	0.3	0	0.098	0.164708	0.280632	0.0857207	0.171492	0.0490262	0.122184	0.0998665	0.24135
uniform	2n = 4x*	5	3	WE	0.0702798	0.19599	0.180075	0.0758348	0.0637285	0.19176	0.0928101	0.1	0.1	0.1	0.1	0.1	0.1	0.076	0.182545	0.286065	0.0953475	0.172129	0.0587782	0.131661	0.101638	0.240899
uniform	2n = 4x*	5	3	VR	NA	NA	NA	NA	NA	NA	NA	NA	NA	NA	NA	NA	NA	NA	NA	NA	NA	NA	NA	NA	NA	NA
uniform	2n = 4x*	5	3	PD	NA	NA	NA	NA	NA	NA	NA	NA	NA	NA	NA	NA	NA	NA	NA	NA	NA	NA	NA	NA	NA	NA
uniform	2n = 4x*	5	3	FA	NA	NA	NA	NA	NA	NA	NA	NA	NA	NA	NA	NA	NA	NA	NA	NA	NA	NA	NA	NA	NA	NA
uniform	2n = 6x*	5	3	MM	0.242705	0.295934	0.0655499	0.073355	0.0536784	0.0331663	0.0687709	0.04	0.07	0.15	0.13	0.13	0.13	0.1904	0.108802	0.130803	0.0553472	0.081858	0.043968	0.066712	0.0579883	0.105634
uniform	2n = 6x*	5	3	ML	0.0375181	0.175063	0.0796908	0.0758226	0.102739	0.12651	0.266909	0.2	0.19	0.08	0.04	0.1	0.21	0.4444	0.116866	0.142608	0.086121	0.114797	0.0696847	0.102511	0.0841717	0.145207
uniform	2n = 6x*	5	3	RI	0.758144	0.0494925	0.0966854	0.114601	0.249744	0.16734	0.12306	0	0	0	0.1	0	0.1	0.046	0.0616706	0.00316216	0.0138057	0.000876157	-0.00210509	0.0297094	-0.0329211	0.0346714
uniform	2n = 6x*	5	3	LO	0.0836804	0.229913	0.0459486	0.250572	0.190378	1.30473e-05	0.0860466	0	0.1	0.1	0.2	0.2	0.1	0.108	0.0811784	0.182999	0.0409837	0.110311	0.00512214	0.0767399	0.037902	0.181568
uniform	2n = 6x*	5	3	WE	0.093276	0.237013	0.0196605	0.196721	0.184461	0.0501854	0.0700304	0	0.1	0.2	0.2	0.1	0.1	0.096	0.0975649	0.180676	0.0494177	0.106783	0.0134905	0.0852176	0.0356211	0.176868
uniform	2n = 6x*	5	3	VR	NA	NA	NA	NA	NA	NA	NA	NA	NA	NA	NA	NA	NA	NA	NA	NA	NA	NA	NA	NA	NA	NA
uniform	2n = 6x*	5	3	PD	NA	NA	NA	NA	NA	NA	NA	NA	NA	NA	NA	NA	NA	NA	NA	NA	NA	NA	NA	NA	NA	NA
uniform	2n = 6x*	5	3	FA	NA	NA	NA	NA	NA	NA	NA	NA	NA	NA	NA	NA	NA	NA	NA	NA	NA	NA	NA	NA	NA	NA
uniform	2n = 8x*	5	3	MM	0.413254	0.445113	0.169215	0.23378	0.0910039	0.0344278	0.0415143	0	0.01	0.15	0.06	0.04	0.11	0.4386	0.0577053	0.06365	0.0350205	0.0480686	0.0213891	0.0486389	0.0190679	0.0769885
uniform	2n = 8x*	5	3	ML	0.0316536	0.381051	0.0235346	0.078138	0.0282606	0.258642	0.342795	0.1	0	0	0	0.1	0.1	0.402	0.0171426	0.204551	0.00898156	0.127408	-0.028309	0.0462471	0.051986	0.201385
uniform	2n = 8x*	5	3	RI	0.0854305	0.659731	0.184067	0.162632	0.403974	0.201989	0.0722245	0	0	0	0.1	0	0.1	0.066	0.0768613	0.156806	0.0308075	0.0785746	0.0023436	0.0592215	0.0181058	0.138471
uniform	2n = 8x*	5	3	LO	0.0812766	0.609432	0.24856	0.132121	0.216753	0.0266025	0.085516	0	0	0.1	0	0.1	0.1	0.142	0.0223708	0.17472	0.011672	0.115998	-0.0254611	0.048773	0.0359578	0.19456
uniform	2n = 8x*	5	3	WE	0.0544655	0.702584	0.29747	0.145438	0.246762	0.0435345	0.071746	0	0	0.2	0.1	0	0.3	0.108	0.0205706	0.145452	0.0103251	0.091014	-0.0253959	0.0460197	0.0152999	0.16569
uniform	2n = 8x*	5	3	VR	NA	NA	NA	NA	NA	NA	NA	NA	NA	NA	NA	NA	NA	NA	NA	NA	NA	NA	NA	NA	NA	NA
uniform	2n = 8x*	5	3	PD	NA	NA	NA	NA	NA	NA	NA	NA	NA	NA	NA	NA	NA	NA	NA	NA	NA	NA	NA	NA	NA	NA
uniform	2n = 8x*	5	3	FA	NA	NA	NA	NA	NA	NA	NA	NA	NA	NA	NA	NA	NA	NA	NA	NA	NA	NA	NA	NA	NA	NA
uniform	2n = 2x	10	3	MM	0.00108293	0.039656	0.000215666	0.0034295	0.0109956	0.00496803	0.0849074	0.26	0.2	0.12	0.17	0.1	0.1	0.1222	0.4505	0.470398	0.297047	0.376217	0.284101	0.309886	0.350765	0.401113
uniform	2n = 2x	10	3	ML	0.0264685	0.0366446	0.0491011	0.0393512	0.0639705	0.072168	0.195168	0.79	0.23	0.11	0.21	0.16	0.27	0.5296	0.477393	0.53374	0.405295	0.454373	0.389768	0.42059	0.428321	0.479671
uniform	2n = 2x	10	3	RI	0.00495474	0.00292356	0.0373514	0.0462076	0.0754549	0.104314	0.0819983	0.4	0.1	0	0.1	0	0.1	0.14	0.423118	0.44224	0.284516	0.367437	0.241802	0.32613	0.279952	0.44887
uniform	2n = 2x	10	3	LO	0.0286712	0.0317918	0.0287708	0.0121708	0.0681899	0.136136	0.0958118	0.2	0.2	0.2	0.1	0	0.2	0.16	0.474536	0.432399	0.334648	0.367985	0.291184	0.376733	0.277585	0.451926
uniform	2n = 2x	10	3	WE	0.0127082	0.0677889	0.0759109	0.024991	0.0358042	0.107968	0.0615038	0.5	0.2	0.1	0.1	0.1	0.3	0.132	0.492117	0.43405	0.34036	0.371272	0.299446	0.380025	0.280873	0.455141
uniform	2n = 2x	10	3	VR	NA	NA	NA	NA	NA	NA	NA	NA	NA	NA	NA	NA	NA	NA	NA	NA	NA	NA	NA	NA	NA	NA
uniform	2n = 2x	10	3	PD	NA	NA	NA	NA	NA	NA	NA	NA	NA	NA	NA	NA	NA	NA	NA	NA	NA	NA	NA	NA	NA	NA
uniform	2n = 2x	10	3	FA	NA	NA	NA	NA	NA	NA	NA	NA	NA	NA	NA	NA	NA	NA	NA	NA	NA	NA	NA	NA	NA	NA
uniform	2n = 4x	10	3	MM	0.12283	0.225891	0.0192767	0.0417156	0.00144324	0.0212861	0.0901313	0.07	0.11	0.15	0.12	0.16	0.09	0.1049	0.226169	0.222908	0.131758	0.163546	0.118987	0.144486	0.136237	0.190608
uniform	2n = 4x	10	3	ML	0.0980649	0.162502	0.0545657	0.00968728	0.0725173	0.127258	0.22444	0.14	0.16	0.18	0.2	0.16	0.17	0.4826	0.220521	0.229394	0.186392	0.201022	0.168098	0.204557	0.168506	0.233101
uniform	2n = 4x	10	3	RI	0.255292	0.0648549	0.0918309	0.142002	0.0416483	0.140374	0.0905228	0.2	0.3	0	0	0.1	0	0.106	0.242783	0.14776	0.13249	0.101273	0.0947491	0.16985	0.0183904	0.182773
uniform	2n = 4x	10	3	LO	0.195458	0.213353	0.162015	0.0860485	0.0222371	0.113955	0.107779	0.2	0.1	0.1	0.2	0.2	0.2	0.126	0.236955	0.212412	0.142838	0.154905	0.100957	0.184214	0.0678753	0.239595
uniform	2n = 4x	10	3	WE	0.218789	0.235528	0.180596	0.106888	0.0195368	0.0746724	0.0874754	0.1	0	0.1	0.1	0.2	0.2	0.134	0.248579	0.215707	0.155187	0.15691	0.112215	0.19758	0.070155	0.24131
uniform	2n = 4x	10	3	VR	NA	NA	NA	NA	NA	NA	NA	NA	NA	NA	NA	NA	NA	NA	NA	NA	NA	NA	NA	NA	NA	NA
uniform	2n = 4x	10	3	PD	NA	NA	NA	NA	NA	NA	NA	NA	NA	NA	NA	NA	NA	NA	NA	NA	NA	NA	NA	NA	NA	NA
uniform	2n = 4x	10	3	FA	NA	NA	NA	NA	NA	NA	NA	NA	NA	NA	NA	NA	NA	NA	NA	NA	NA	NA	NA	NA	NA	NA
uniform	2n = 6x	10	3	MM	0.207375	0.256957	0.00112079	0.110611	0.00924648	0.00069885	0.0920667	0.09	0.06	0.14	0.1	0.1	0.12	0.1155	0.13617	0.143985	0.0701355	0.0936053	0.0586468	0.0816057	0.0688939	0.118202
uniform	2n = 6x	10	3	ML	0.101539	0.153619	0.100158	0.0224025	0.100465	0.118667	0.233331	0.24	0.17	0.11	0.05	0.1	0.21	0.4602	0.172111	0.208601	0.145568	0.182322	0.126973	0.164062	0.149668	0.214578
uniform	2n = 6x	10	3	RI	0.0154322	0.154055	0.352877	0.404659	0.154576	0.24001	0.199536	0	0.2	0	0.1	0	0.1	0.062	0.00468991	-0.00123467	0.000793528	-0.000338762	-0.011251	0.0128378	-0.0338057	0.0331289
uniform	2n = 6x	10	3	LO	0.0912305	0.272427	0.0234972	0.00397222	0.0486005	0.0335503	0.116929	0.1	0	0.2	0	0.2	0.2	0.134	0.179152	0.241377	0.10057	0.150038	0.0610368	0.139788	0.0762985	0.222145
uniform	2n = 6x	10	3	WE	0.121272	0.26864	0.0105474	0.0311436	0.0648528	0.0469327	0.115911	0	0.1	0.1	0.2	0.1	0.2	0.118	0.198237	0.244384	0.117245	0.146562	0.075838	0.158248	0.0752133	0.216417
uniform	2n = 6x	10	3	VR	NA	NA	NA	NA	NA	NA	NA	NA	NA	NA	NA	NA	NA	NA	NA	NA	NA	NA	NA	NA	NA	NA
uniform	2n = 6x	10	3	PD	NA	NA	NA	NA	NA	NA	NA	NA	NA	NA	NA	NA	NA	NA	NA	NA	NA	NA	NA	NA	NA	NA
uniform	2n = 6x	10	3	FA	NA	NA	NA	NA	NA	NA	NA	NA	NA	NA	NA	NA	NA	NA	NA	NA	NA	NA	NA	NA	NA	NA
uniform	2n = 8x	10	3	MM	0.4052	0.434066	0.139082	0.168226	0.0689924	0.0290716	0.066925	0.01	0	0.16	0.06	0.15	0.12	0.3044	0.0553225	0.0858156	0.0325604	0.0615711	0.0193407	0.0457688	0.0340716	0.0889775
uniform	2n = 8x	10	3	ML	0.0164978	0.220808	0.0681613	0.0239343	0.126934	0.189816	0.2809	0.2	0.4	0	0	0.3	0	0.478	0.0540226	0.170524	0.0356926	0.112005	-0.0113109	0.0825387	0.0322611	0.190333
uniform	2n = 8x	10	3	RI	0.212941	0.314363	0.0342151	0.162134	0.0580895	0.107623	0.0808841	0.1	0.1	0.1	0	0.2	0.2	0.09	0.0650152	0.107226	0.0296337	0.0577661	-0.00276971	0.061975	-0.00766705	0.122707
uniform	2n = 8x	10	3	LO	0.229059	0.354943	0.130109	0.180654	0.0503139	0.03751	0.0685943	0.1	0	0.2	0.1	0	0.1	0.138	0.0833091	0.151017	0.0463044	0.104443	0.00679673	0.0856677	0.0207779	0.186655
uniform	2n = 8x	10	3	WE	0.242272	0.363741	0.126956	0.220144	0.0541932	0.015112	0.0319908	0.2	0.1	0.2	0	0	0	0.114	0.091042	0.154045	0.0484462	0.102294	0.0106644	0.0860898	0.021941	0.181333
uniform	2n = 8x	10	3	VR	NA	NA	NA	NA	NA	NA	NA	NA	NA	NA	NA	NA	NA	NA	NA	NA	NA	NA	NA	NA	NA	NA
uniform	2n = 8x	10	3	PD	NA	NA	NA	NA	NA	NA	NA	NA	NA	NA	NA	NA	NA	NA	NA	NA	NA	NA	NA	NA	NA	NA
uniform	2n = 8x	10	3	FA	NA	NA	NA	NA	NA	NA	NA	NA	NA	NA	NA	NA	NA	NA	NA	NA	NA	NA	NA	NA	NA	NA
uniform	2n = 4x*	10	3	MM	0.100709	0.192244	0.00318719	0.042963	0.0401741	0.053962	0.0853055	0.15	0.1	0.1	0.14	0.09	0.16	0.1074	0.206179	0.264632	0.121856	0.192908	0.108833	0.134837	0.166119	0.219414
uniform	2n = 4x*	10	3	ML	0.0568874	0.151623	0.050891	0.0193718	0.127353	0.14181	0.219627	0.24	0.14	0.15	0.24	0.11	0.12	0.4882	0.213286	0.266864	0.185426	0.240093	0.16658	0.204136	0.207268	0.272378
uniform	2n = 4x*	10	3	RI	0.0800982	0.126051	0.115169	0.199847	0.0675264	0.156035	0.0975439	0.1	0.1	0.1	0	0	0.1	0.096	0.200628	0.271626	0.118752	0.205359	0.0774566	0.15964	0.117007	0.290486
uniform	2n = 4x*	10	3	LO	0.139174	0.0624311	0.0710168	0.137592	0.136357	0.221937	0.102233	0.3	0.3	0.2	0.2	0	0.2	0.148	0.253135	0.293832	0.160002	0.232343	0.116351	0.203036	0.140765	0.319978
uniform	2n = 4x*	10	3	WE	0.13959	0.0800551	0.0793894	0.152518	0.141753	0.212823	0.093018	0.2	0.1	0.1	0.1	0	0.3	0.126	0.280318	0.303372	0.181388	0.235759	0.137507	0.224559	0.145618	0.322018
uniform	2n = 4x*	10	3	VR	NA	NA	NA	NA	NA	NA	NA	NA	NA	NA	NA	NA	NA	NA	NA	NA	NA	NA	NA	NA	NA	NA
uniform	2n = 4x*	10	3	PD	NA	NA	NA	NA	NA	NA	NA	NA	NA	NA	NA	NA	NA	NA	NA	NA	NA	NA	NA	NA	NA	NA
uniform	2n = 4x*	10	3	FA	NA	NA	NA	NA	NA	NA	NA	NA	NA	NA	NA	NA	NA	NA	NA	NA	NA	NA	NA	NA	NA	NA
uniform	2n = 6x*	10	3	MM	0.167756	0.258932	0.0292404	0.0605177	0.0547569	0.0563864	0.0844903	0.1	0.12	0.09	0.12	0.1	0.09	0.1141	0.149514	0.188481	0.0789054	0.120451	0.0671618	0.0906272	0.0963627	0.144399
uniform	2n = 6x*	10	3	ML	0.0947726	0.155679	0.0491149	0.0105163	0.0815168	0.0942242	0.232762	0.2	0.22	0.07	0.13	0.13	0.18	0.462	0.165244	0.213445	0.141425	0.190703	0.122579	0.16017	0.157427	0.223547
uniform	2n = 6x*	10	3	RI	0.0492568	0.380797	0.0644357	0.00683804	0.200836	0.0185693	0.147119	0.1	0.2	0	0.2	0	0.1	0.052	-0.0194801	0.0693108	-0.00489782	0.0222789	-0.0227911	0.0129986	-0.0168541	0.0613438
uniform	2n = 6x*	10	3	LO	0.0934231	0.331612	0.00950479	0.163203	0.037471	0.0178131	0.0907109	0.3	0	0	0.2	0.1	0	0.134	0.11479	0.264228	0.0626771	0.192291	0.023986	0.101181	0.106713	0.27504
uniform	2n = 6x*	10	3	WE	0.127323	0.353628	0.0268731	0.122551	0.072435	0.0239028	0.0718702	0.2	0.2	0.1	0.1	0.1	0.1	0.134	0.139971	0.281962	0.078788	0.20377	0.0390818	0.118246	0.119192	0.285412
uniform	2n = 6x*	10	3	VR	NA	NA	NA	NA	NA	NA	NA	NA	NA	NA	NA	NA	NA	NA	NA	NA	NA	NA	NA	NA	NA	NA
uniform	2n = 6x*	10	3	PD	NA	NA	NA	NA	NA	NA	NA	NA	NA	NA	NA	NA	NA	NA	NA	NA	NA	NA	NA	NA	NA	NA
uniform	2n = 6x*	10	3	FA	NA	NA	NA	NA	NA	NA	NA	NA	NA	NA	NA	NA	NA	NA	NA	NA	NA	NA	NA	NA	NA	NA
uniform	2n = 8x*	10	3	MM	0.384486	0.424136	0.141913	0.183904	0.139377	0.00802718	0.061876	0.03	0	0.12	0.08	0.08	0.16	0.2774	0.0631272	0.0649353	0.0356242	0.046433	0.0229551	0.0482818	0.0189827	0.0738133
uniform	2n = 8x*	10	3	ML	0.0587125	0.135667	0.0570692	0.0202939	0.0219004	0.247225	0.290813	0.2	0.1	0	0.2	0.1	0	0.456	0.0135746	0.1622	0.00902722	0.116896	-0.0382944	0.0563084	0.0295232	0.202497
uniform	2n = 8x*	10	3	RI	0.201647	0.386192	0.366029	0.17523	0.250131	0.020084	0.0826242	0	0.1	0.1	0.1	0.2	0.1	0.074	0.0073913	0.119077	0.00347954	0.0631762	-0.030024	0.0369753	-0.00123924	0.12707
uniform	2n = 8x*	10	3	LO	0.151039	0.467498	0.351109	0.107728	0.211026	0.0460257	0.0756782	0	0.1	0	0.2	0.1	0	0.164	0.021769	0.141452	0.0116532	0.0899301	-0.0264458	0.0497183	0.0128346	0.165963
uniform	2n = 8x*	10	3	WE	0.103559	0.460554	0.357654	0.13138	0.160376	0.025544	0.073081	0	0.1	0.1	0.3	0.2	0.1	0.136	0.0393237	0.109479	0.0213342	0.0636553	-0.0172721	0.059877	-0.00716927	0.133844
uniform	2n = 8x*	10	3	VR	NA	NA	NA	NA	NA	NA	NA	NA	NA	NA	NA	NA	NA	NA	NA	NA	NA	NA	NA	NA	NA	NA
uniform	2n = 8x*	10	3	PD	NA	NA	NA	NA	NA	NA	NA	NA	NA	NA	NA	NA	NA	NA	NA	NA	NA	NA	NA	NA	NA	NA
uniform	2n = 8x*	10	3	FA	NA	NA	NA	NA	NA	NA	NA	NA	NA	NA	NA	NA	NA	NA	NA	NA	NA	NA	NA	NA	NA	NA
uniform	2n = 2x	15	3	MM	0.000283155	0.0193449	0.00992593	0.0142408	0.0160628	0.0291573	0.08758	0.29	0.15	0.16	0.16	0.24	0.15	0.1766	0.508551	0.574851	0.375862	0.493309	0.362077	0.389482	0.469339	0.516552
uniform	2n = 2x	15	3	ML	0.0364241	0.0368983	0.0536253	0.0458033	0.0626788	0.110489	0.173601	0.66	0.17	0.17	0.25	0.19	0.27	0.5444	0.549206	0.650597	0.508887	0.600918	0.493744	0.523722	0.578179	0.622725
uniform	2n = 2x	15	3	RI	0.0095942	0.0665542	0.117622	0.0810429	0.0655058	0.0832421	0.0731279	0.4	0.1	0.1	0.1	0	0.2	0.144	0.533187	0.549299	0.404128	0.455463	0.360566	0.445932	0.376285	0.528037
uniform	2n = 2x	15	3	LO	0.0305816	0.0383329	0.0829733	0.092868	0.0425766	0.0748905	0.0842992	0.4	0.3	0.1	0.1	0.1	0	0.18	0.55797	0.578072	0.417419	0.512308	0.374307	0.45873	0.432434	0.584205
uniform	2n = 2x	15	3	WE	0.0134033	0.0786461	0.121066	0.0520291	0.090265	0.119433	0.0622991	0.4	0.1	0.1	0.4	0.3	0	0.172	0.569025	0.576302	0.442447	0.500563	0.40071	0.482351	0.420499	0.572892
uniform	2n = 2x	15	3	VR	NA	NA	NA	NA	NA	NA	NA	NA	NA	NA	NA	NA	NA	NA	NA	NA	NA	NA	NA	NA	NA	NA
uniform	2n = 2x	15	3	PD	NA	NA	NA	NA	NA	NA	NA	NA	NA	NA	NA	NA	NA	NA	NA	NA	NA	NA	NA	NA	NA	NA
uniform	2n = 2x	15	3	FA	NA	NA	NA	NA	NA	NA	NA	NA	NA	NA	NA	NA	NA	NA	NA	NA	NA	NA	NA	NA	NA	NA
uniform	2n = 4x	15	3	MM	0.0981794	0.204489	0.0070842	0.0835563	0.00781677	0.0263376	0.0905237	0.12	0.1	0.18	0.1	0.1	0.11	0.1224	0.219642	0.24549	0.138325	0.191798	0.124503	0.152093	0.162968	0.220301
uniform	2n = 4x	15	3	ML	0.0739751	0.172918	0.0282024	0.0140946	0.0649168	0.0863913	0.205488	0.14	0.15	0.24	0.16	0.1	0.22	0.5156	0.219786	0.259186	0.195722	0.236074	0.176492	0.214804	0.202781	0.268823
uniform	2n = 4x	15	3	RI	0.241112	0.250371	0.284575	0.105155	0.14912	0.046207	0.103857	0.1	0.1	0	0	0.2	0	0.144	0.252877	0.230418	0.152706	0.171104	0.111048	0.193828	0.0830299	0.256526
uniform	2n = 4x	15	3	LO	0.232418	0.198641	0.167871	0.0674633	0.052335	0.0332637	0.10668	0.1	0.1	0	0	0.1	0.1	0.152	0.267393	0.242132	0.169886	0.199526	0.125982	0.213126	0.102307	0.292969
uniform	2n = 4x	15	3	WE	0.272466	0.217804	0.205371	0.0988572	0.0159717	0.00555453	0.0890531	0.1	0	0	0	0	0.1	0.166	0.289757	0.256834	0.193184	0.209411	0.147752	0.237803	0.113687	0.301283
uniform	2n = 4x	15	3	VR	NA	NA	NA	NA	NA	NA	NA	NA	NA	NA	NA	NA	NA	NA	NA	NA	NA	NA	NA	NA	NA	NA
uniform	2n = 4x	15	3	PD	NA	NA	NA	NA	NA	NA	NA	NA	NA	NA	NA	NA	NA	NA	NA	NA	NA	NA	NA	NA	NA	NA
uniform	2n = 4x	15	3	FA	NA	NA	NA	NA	NA	NA	NA	NA	NA	NA	NA	NA	NA	NA	NA	NA	NA	NA	NA	NA	NA	NA
uniform	2n = 6x	15	3	MM	0.171437	0.165678	0.0109069	0.102116	0.0100263	0.0440406	0.0981622	0.13	0.19	0.13	0.13	0.1	0.1	0.1043	0.172093	0.184645	0.0912146	0.124741	0.0794551	0.102949	0.0992804	0.150038
uniform	2n = 6x	15	3	ML	0.114882	0.125968	0.0603836	0.0104563	0.101093	0.13447	0.218568	0.16	0.18	0.1	0.05	0.1	0.24	0.4628	0.190674	0.217578	0.167407	0.195684	0.148234	0.186453	0.162238	0.22868
uniform	2n = 6x	15	3	RI	0.0240757	0.0690778	0.0526298	0.217117	0.143274	0.743349	0.112542	0.1	0.2	0.1	0.2	0.1	0.2	0.062	0.0740634	0.0173615	0.0204287	0.00699688	0.000836154	0.0400056	-0.0421483	0.0561083
uniform	2n = 6x	15	3	LO	0.147232	0.000161712	0.000703055	0.18827	0.0227411	0.0114764	0.106745	0.2	0.3	0.1	0.2	0.3	0	0.172	0.204854	0.172936	0.13085	0.117894	0.0860608	0.175111	0.0357299	0.198476
uniform	2n = 6x	15	3	WE	0.168547	0.00570889	0.00983748	0.212971	0.00742228	0.00722882	0.088829	0.1	0.1	0.1	0	0.2	0	0.172	0.22941	0.17606	0.153401	0.117897	0.106996	0.19914	0.0370881	0.197174
uniform	2n = 6x	15	3	VR	NA	NA	NA	NA	NA	NA	NA	NA	NA	NA	NA	NA	NA	NA	NA	NA	NA	NA	NA	NA	NA	NA
uniform	2n = 6x	15	3	PD	NA	NA	NA	NA	NA	NA	NA	NA	NA	NA	NA	NA	NA	NA	NA	NA	NA	NA	NA	NA	NA	NA
uniform	2n = 6x	15	3	FA	NA	NA	NA	NA	NA	NA	NA	NA	NA	NA	NA	NA	NA	NA	NA	NA	NA	NA	NA	NA	NA	NA
uniform	2n = 8x	15	3	MM	0.369345	0.41783	0.187835	0.154501	0.0892112	0.0390431	0.0772732	0.04	0.03	0.11	0.12	0.09	0.15	0.2461	0.0791108	0.121596	0.0420806	0.0866883	0.0301503	0.0539989	0.0594846	0.113763
uniform	2n = 8x	15	3	ML	0.0187513	0.241836	0.0025894	0.026909	0.17541	0.105021	0.260253	0.1	0	0.1	0	0.1	0.1	0.466	0.0766792	0.218411	0.0521398	0.145737	0.00381571	0.100221	0.0651401	0.224445
uniform	2n = 8x	15	3	RI	0.143623	0.430551	0.173678	0.112549	0.0193241	0.117544	0.0710315	0	0.2	0.1	0.1	0	0	0.09	0.107943	0.101588	0.0488129	0.0621111	0.0167444	0.0807811	-0.0122142	0.135754
uniform	2n = 8x	15	3	LO	0.204296	0.404383	0.178717	0.16182	0.0180064	0.0578613	0.0811957	0.3	0.1	0.1	0	0.2	0.1	0.128	0.0794188	0.166063	0.0435571	0.121938	0.00456048	0.0824214	0.0332637	0.208708
uniform	2n = 8x	15	3	WE	0.17766	0.40707	0.166761	0.169042	0.0038304	0.077543	0.0704597	0.1	0	0	0.2	0	0.1	0.136	0.0847648	0.160871	0.0458266	0.113331	0.00740968	0.0841084	0.0283638	0.196673
uniform	2n = 8x	15	3	VR	NA	NA	NA	NA	NA	NA	NA	NA	NA	NA	NA	NA	NA	NA	NA	NA	NA	NA	NA	NA	NA	NA
uniform	2n = 8x	15	3	PD	NA	NA	NA	NA	NA	NA	NA	NA	NA	NA	NA	NA	NA	NA	NA	NA	NA	NA	NA	NA	NA	NA
uniform	2n = 8x	15	3	FA	NA	NA	NA	NA	NA	NA	NA	NA	NA	NA	NA	NA	NA	NA	NA	NA	NA	NA	NA	NA	NA	NA
uniform	2n = 4x*	15	3	MM	0.105081	0.178139	0.000928071	0.0520841	0.0124586	0.0365701	0.0875028	0.13	0.13	0.15	0.12	0.07	0.17	0.1178	0.220724	0.289428	0.139088	0.222259	0.12523	0.152891	0.19433	0.249827
uniform	2n = 4x*	15	3	ML	0.078342	0.141294	0.0430063	0.00243954	0.0878756	0.117035	0.205966	0.18	0.18	0.18	0.21	0.07	0.21	0.51	0.216317	0.279181	0.197889	0.26253	0.178126	0.217492	0.228609	0.295815
uniform	2n = 4x*	15	3	RI	0.178131	0.11669	0.226159	0.260052	0.0174088	0.0543637	0.0845875	0.1	0.1	0.1	0	0.1	0.1	0.1	0.261755	0.360433	0.159153	0.252974	0.117125	0.200612	0.173701	0.32899
uniform	2n = 4x*	15	3	LO	0.117013	0.154584	0.125131	0.232645	0.0164667	0.0709879	0.0998707	0.2	0.2	0.2	0	0.5	0	0.118	0.264268	0.377771	0.162616	0.290457	0.119774	0.204853	0.204617	0.371863
uniform	2n = 4x*	15	3	WE	0.142472	0.169204	0.148615	0.243307	0.0378404	0.0644124	0.0830697	0.1	0.1	0.4	0	0.4	0	0.128	0.281602	0.381935	0.185057	0.28326	0.139904	0.229443	0.199912	0.362538
uniform	2n = 4x*	15	3	VR	NA	NA	NA	NA	NA	NA	NA	NA	NA	NA	NA	NA	NA	NA	NA	NA	NA	NA	NA	NA	NA	NA
uniform	2n = 4x*	15	3	PD	NA	NA	NA	NA	NA	NA	NA	NA	NA	NA	NA	NA	NA	NA	NA	NA	NA	NA	NA	NA	NA	NA
uniform	2n = 4x*	15	3	FA	NA	NA	NA	NA	NA	NA	NA	NA	NA	NA	NA	NA	NA	NA	NA	NA	NA	NA	NA	NA	NA	NA
uniform	2n = 6x*	15	3	MM	0.138414	0.240658	0.00826811	0.0505715	0.0567495	0.0725772	0.0889318	0.1	0.12	0.12	0.14	0.11	0.08	0.1042	0.142416	0.193686	0.0793658	0.134606	0.0669489	0.0917581	0.10847	0.160557
uniform	2n = 6x*	15	3	ML	0.0911573	0.167622	0.0718454	0.0169891	0.0674013	0.0742311	0.215601	0.21	0.13	0.12	0.13	0.12	0.18	0.4734	0.179094	0.229486	0.162488	0.212638	0.142621	0.182225	0.178392	0.246369
uniform	2n = 6x*	15	3	RI	0.221362	0.149695	0.00110217	0.236802	0.0735261	0.128076	0.0855978	0.1	0	0.1	0	0.1	0	0.054	0.0570691	0.04324	0.0134582	0.00788906	-0.00330698	0.0302158	-0.0143529	0.0301232
uniform	2n = 6x*	15	3	LO	0.128498	0.28151	0.0596689	0.0611243	0.0481741	0.00888903	0.0851427	0.1	0.1	0.1	0.2	0	0	0.124	0.124222	0.227684	0.0687365	0.168236	0.0295462	0.107716	0.0803802	0.253498
uniform	2n = 6x*	15	3	WE	0.147472	0.300989	0.0861294	0.0338961	0.0351887	0.0123509	0.0722391	0.1	0.1	0	0.3	0	0	0.148	0.140579	0.228445	0.080763	0.161332	0.040183	0.121077	0.0770163	0.243357
uniform	2n = 6x*	15	3	VR	NA	NA	NA	NA	NA	NA	NA	NA	NA	NA	NA	NA	NA	NA	NA	NA	NA	NA	NA	NA	NA	NA
uniform	2n = 6x*	15	3	PD	NA	NA	NA	NA	NA	NA	NA	NA	NA	NA	NA	NA	NA	NA	NA	NA	NA	NA	NA	NA	NA	NA
uniform	2n = 6x*	15	3	FA	NA	NA	NA	NA	NA	NA	NA	NA	NA	NA	NA	NA	NA	NA	NA	NA	NA	NA	NA	NA	NA	NA
uniform	2n = 8x*	15	3	MM	0.400955	0.427711	0.12725	0.189008	0.117155	0.0553436	0.0650622	0.04	0.03	0.12	0.12	0.11	0.17	0.2394	0.0759394	0.0875518	0.0435387	0.0638553	0.0306768	0.0563861	0.0359026	0.0917082
uniform	2n = 8x*	15	3	ML	0.00536481	0.157274	0.0694255	0.0845921	0.0482694	0.323856	0.292749	0.1	0	0	0.1	0	0	0.434	0.104878	0.10004	0.0765917	0.0731282	0.0248065	0.127967	-0.0159463	0.161051
uniform	2n = 8x*	15	3	RI	0.0835108	0.320114	0.287481	0.188784	0.221922	0.152459	0.0912415	0	0.1	0	0.2	0	0.2	0.068	0.056567	0.0898879	0.0278943	0.0515925	-0.00717779	0.0628979	-0.0182636	0.120947
uniform	2n = 8x*	15	3	LO	0.130283	0.374594	0.269951	0.196976	0.202135	0.0470358	0.0724893	0.2	0	0	0.2	0	0.3	0.182	0.0498843	0.109232	0.0283458	0.0724327	-0.0120825	0.0686816	-0.00819816	0.152128
uniform	2n = 8x*	15	3	WE	0.180491	0.384395	0.302596	0.260492	0.231999	0.0038642	0.086882	0	0	0	0	0	0.2	0.18	0.0697532	0.133573	0.0387913	0.0825824	-0.000761703	0.0782231	0.0075287	0.156711
uniform	2n = 8x*	15	3	VR	NA	NA	NA	NA	NA	NA	NA	NA	NA	NA	NA	NA	NA	NA	NA	NA	NA	NA	NA	NA	NA	NA
uniform	2n = 8x*	15	3	PD	NA	NA	NA	NA	NA	NA	NA	NA	NA	NA	NA	NA	NA	NA	NA	NA	NA	NA	NA	NA	NA	NA
uniform	2n = 8x*	15	3	FA	NA	NA	NA	NA	NA	NA	NA	NA	NA	NA	NA	NA	NA	NA	NA	NA	NA	NA	NA	NA	NA	NA
uniform	2n = 2x	20	3	MM	0.00433803	0.00258032	0.00171599	5.37985e-05	0.00962807	0.0170508	0.0927735	0.35	0.22	0.24	0.23	0.18	0.35	0.2022	0.582058	0.648709	0.44829	0.580795	0.434915	0.461469	0.558886	0.601893
uniform	2n = 2x	20	3	ML	0.0274277	0.0251075	0.0118796	0.0171837	0.0490344	0.0500944	0.164084	0.77	0.22	0.29	0.2	0.2	0.39	0.5524	0.630461	0.729872	0.599961	0.696018	0.586448	0.61314	0.676995	0.714111
uniform	2n = 2x	20	3	RI	0.0276179	0.0309918	0.0433822	0.00439586	0.108848	0.0268776	0.0749948	0.2	0.2	0.2	0.4	0.2	0.5	0.184	0.562123	0.661797	0.459337	0.585822	0.414733	0.501739	0.5156	0.648227
uniform	2n = 2x	20	3	LO	0.00290109	0.0280959	0.0386232	0.0504416	0.103925	0.0214043	0.0925625	0.1	0.4	0.2	0.2	0.1	0.3	0.174	0.604316	0.687444	0.491267	0.60957	0.448382	0.531896	0.543271	0.668313
uniform	2n = 2x	20	3	WE	0.0120406	0.0527335	0.0487539	0.0219134	0.120822	0.051888	0.059671	0.2	0.4	0.3	0.3	0.1	0.4	0.158	0.595341	0.668726	0.463287	0.570271	0.422559	0.502147	0.501309	0.632033
uniform	2n = 2x	20	3	VR	NA	NA	NA	NA	NA	NA	NA	NA	NA	NA	NA	NA	NA	NA	NA	NA	NA	NA	NA	NA	NA	NA
uniform	2n = 2x	20	3	PD	NA	NA	NA	NA	NA	NA	NA	NA	NA	NA	NA	NA	NA	NA	NA	NA	NA	NA	NA	NA	NA	NA
uniform	2n = 2x	20	3	FA	NA	NA	NA	NA	NA	NA	NA	NA	NA	NA	NA	NA	NA	NA	NA	NA	NA	NA	NA	NA	NA	NA
uniform	2n = 4x	20	3	MM	0.136363	0.209653	0.0293712	0.0677042	0.0190823	0.0267753	0.0900251	0.08	0.13	0.08	0.15	0.11	0.14	0.1254	0.244279	0.279642	0.159537	0.226691	0.145278	0.17373	0.197204	0.255769
uniform	2n = 4x	20	3	ML	0.106174	0.180172	0.0178575	0.0191886	0.0667956	0.0957485	0.197363	0.09	0.15	0.23	0.12	0.1	0.23	0.5262	0.24423	0.270447	0.224489	0.256403	0.204871	0.243928	0.22208	0.290092
uniform	2n = 4x	20	3	RI	0.263116	0.189395	0.00409121	0.13666	0.104398	0.0139871	0.0932174	0.1	0	0.2	0	0	0.1	0.136	0.280472	0.171018	0.181826	0.130432	0.137386	0.225536	0.0385066	0.220168
uniform	2n = 4x	20	3	LO	0.254438	0.128561	0.0402318	0.0865693	0.0719431	0.00811415	0.0992785	0.3	0.1	0.4	0.1	0.1	0	0.15	0.319623	0.186124	0.211426	0.155654	0.166261	0.255706	0.0551617	0.253024
uniform	2n = 4x	20	3	WE	0.277564	0.147327	0.0581704	0.0975395	0.0536133	0.0142881	0.08422	0.4	0.1	0.1	0.1	0.1	0	0.12	0.348343	0.199176	0.248572	0.162782	0.201062	0.294915	0.0647097	0.25774
uniform	2n = 4x	20	3	VR	NA	NA	NA	NA	NA	NA	NA	NA	NA	NA	NA	NA	NA	NA	NA	NA	NA	NA	NA	NA	NA	NA
uniform	2n = 4x	20	3	PD	NA	NA	NA	NA	NA	NA	NA	NA	NA	NA	NA	NA	NA	NA	NA	NA	NA	NA	NA	NA	NA	NA
uniform	2n = 4x	20	3	FA	NA	NA	NA	NA	NA	NA	NA	NA	NA	NA	NA	NA	NA	NA	NA	NA	NA	NA	NA	NA	NA	NA
uniform	2n = 6x	20	3	MM	0.146464	0.174352	0.0292705	0.0575585	0.00660889	0.0418936	0.0901179	0.21	0.13	0.11	0.09	0.07	0.11	0.098	0.167409	0.164112	0.0935482	0.116153	0.0811338	0.105934	0.0893618	0.142777
uniform	2n = 6x	20	3	ML	0.11061	0.137272	0.0808554	0.0168646	0.0944979	0.121308	0.211006	0.26	0.15	0.08	0.13	0.11	0.28	0.4652	0.196577	0.234113	0.178878	0.219278	0.15907	0.198541	0.184761	0.253254
uniform	2n = 6x	20	3	RI	0.117584	0.278924	0.0237305	0.258473	0.107032	0.19219	0.169768	0.2	0.1	0.3	0	0	0.1	0.076	0.0345549	0.0989498	0.00433717	0.0406725	-0.00459303	0.0132667	-0.0092697	0.0904124
uniform	2n = 6x	20	3	LO	0.197802	0.135414	0.0461241	0.182788	0.0163959	0.000660023	0.107339	0.2	0.1	0.2	0.3	0	0.2	0.126	0.225065	0.176222	0.134328	0.120025	0.0926092	0.175576	0.0380012	0.200442
uniform	2n = 6x	20	3	WE	0.219164	0.113141	0.0384299	0.19296	0.00145046	0.00309502	0.0922251	0.2	0.1	0.2	0.3	0	0.3	0.136	0.243782	0.171693	0.151967	0.115233	0.108755	0.194606	0.034276	0.194688
uniform	2n = 6x	20	3	VR	NA	NA	NA	NA	NA	NA	NA	NA	NA	NA	NA	NA	NA	NA	NA	NA	NA	NA	NA	NA	NA	NA
uniform	2n = 6x	20	3	PD	NA	NA	NA	NA	NA	NA	NA	NA	NA	NA	NA	NA	NA	NA	NA	NA	NA	NA	NA	NA	NA	NA
uniform	2n = 6x	20	3	FA	NA	NA	NA	NA	NA	NA	NA	NA	NA	NA	NA	NA	NA	NA	NA	NA	NA	NA	NA	NA	NA	NA
uniform	2n = 8x	20	3	MM	0.366213	0.419621	0.161288	0.194002	0.138149	0.038361	0.0764065	0.03	0.03	0.1	0.08	0.14	0.19	0.245	0.0805736	0.0990244	0.0472316	0.0703045	0.0340857	0.0603612	0.0431327	0.0973724
uniform	2n = 8x	20	3	ML	0.124947	0.230561	0.157618	0.00343898	0.152058	0.235508	0.2702	0.1	0.4	0.1	0	0.1	0	0.474	0.0953579	0.0485312	0.0673504	0.0365175	0.0172242	0.117139	-0.0552315	0.127655
uniform	2n = 8x	20	3	RI	0.312426	0.402281	0.0331717	0.14527	0.0425321	0.0239597	0.108941	0.3	0	0.3	0.1	0.1	0.1	0.104	0.085536	0.0524476	0.0410783	0.0308547	0.00695708	0.0751041	-0.0408537	0.102247
uniform	2n = 8x	20	3	LO	0.291445	0.42781	0.029473	0.211206	0.0358152	0.0307104	0.0857812	0.1	0	0.2	0.2	0.3	0.4	0.212	0.0822147	0.0793394	0.0463545	0.0568777	0.00626327	0.0862969	-0.030466	0.143359
uniform	2n = 8x	20	3	WE	0.317164	0.406011	0.0530335	0.217392	0.0425511	0.0435078	0.0835502	0.1	0	0.1	0.1	0.3	0	0.174	0.105365	0.0959511	0.0597276	0.067252	0.0194739	0.0997881	-0.0180214	0.151554
uniform	2n = 8x	20	3	VR	NA	NA	NA	NA	NA	NA	NA	NA	NA	NA	NA	NA	NA	NA	NA	NA	NA	NA	NA	NA	NA	NA
uniform	2n = 8x	20	3	PD	NA	NA	NA	NA	NA	NA	NA	NA	NA	NA	NA	NA	NA	NA	NA	NA	NA	NA	NA	NA	NA	NA
uniform	2n = 8x	20	3	FA	NA	NA	NA	NA	NA	NA	NA	NA	NA	NA	NA	NA	NA	NA	NA	NA	NA	NA	NA	NA	NA	NA
uniform	2n = 4x*	20	3	MM	0.0917124	0.215182	0.00669951	0.0776308	0.00751706	0.00128499	0.0956872	0.15	0.1	0.15	0.1	0.12	0.13	0.1302	0.258005	0.303269	0.168578	0.243916	0.154331	0.182754	0.214905	0.272497
uniform	2n = 4x*	20	3	ML	0.0693054	0.174337	0.0383417	0.0146651	0.0630539	0.096127	0.198598	0.13	0.17	0.2	0.15	0.14	0.18	0.5166	0.255634	0.313519	0.238618	0.301762	0.218811	0.258228	0.267794	0.334981
uniform	2n = 4x*	20	3	RI	0.000354176	0.187499	0.0217272	0.24403	0.0167413	0.00405892	0.0741153	0.2	0.1	0.2	0	0.2	0.2	0.12	0.27902	0.470271	0.180175	0.335466	0.135727	0.223899	0.25867	0.408049
uniform	2n = 4x*	20	3	LO	0.0255927	0.193865	0.00148014	0.247685	0.0738251	0.0371666	0.0923863	0.3	0.2	0.1	0.2	0.1	0.1	0.124	0.3081	0.454039	0.195356	0.345522	0.151593	0.238355	0.264041	0.422105
uniform	2n = 4x*	20	3	WE	0.00274126	0.216528	0.0310805	0.285817	0.0543476	0.00789046	0.0780428	0.2	0	0.2	0.1	0.2	0.1	0.126	0.341706	0.462501	0.240097	0.336666	0.193023	0.286069	0.257708	0.411157
uniform	2n = 4x*	20	3	VR	NA	NA	NA	NA	NA	NA	NA	NA	NA	NA	NA	NA	NA	NA	NA	NA	NA	NA	NA	NA	NA	NA
uniform	2n = 4x*	20	3	PD	NA	NA	NA	NA	NA	NA	NA	NA	NA	NA	NA	NA	NA	NA	NA	NA	NA	NA	NA	NA	NA	NA
uniform	2n = 4x*	20	3	FA	NA	NA	NA	NA	NA	NA	NA	NA	NA	NA	NA	NA	NA	NA	NA	NA	NA	NA	NA	NA	NA	NA
uniform	2n = 6x*	20	3	MM	0.129158	0.243232	0.00621599	0.0519352	0.075327	0.0765143	0.0865157	0.17	0.13	0.14	0.15	0.09	0.12	0.1079	0.148046	0.208294	0.0863963	0.148143	0.0734049	0.0993583	0.121475	0.174598
uniform	2n = 6x*	20	3	ML	0.0949669	0.203322	0.0399259	0.00105732	0.0506157	0.0578908	0.204523	0.2	0.11	0.14	0.14	0.06	0.22	0.4816	0.194499	0.257725	0.180272	0.248132	0.160092	0.200302	0.213108	0.282519
uniform	2n = 6x*	20	3	RI	0.224866	0.236211	0.034657	0.147392	0.0187225	0.0382659	0.106106	0.1	0	0.2	0	0	0	0.082	-0.0102847	0.0336819	-0.00338591	0.0136113	-0.0268157	0.0200476	-0.0356616	0.0628183
uniform	2n = 6x*	20	3	LO	0.10967	0.350328	0.0298218	0.0673633	0.019999	0.0933083	0.0812761	0.2	0.3	0	0.2	0	0.4	0.17	0.198531	0.246581	0.117182	0.177886	0.0757515	0.158209	0.092588	0.260592
uniform	2n = 6x*	20	3	WE	0.102486	0.363941	0.0395593	0.078585	0.0123744	0.0968946	0.0666194	0.2	0.2	0	0.2	0.1	0.5	0.186	0.220911	0.253563	0.138266	0.177822	0.0947049	0.181299	0.0947956	0.258392
uniform	2n = 6x*	20	3	VR	NA	NA	NA	NA	NA	NA	NA	NA	NA	NA	NA	NA	NA	NA	NA	NA	NA	NA	NA	NA	NA	NA
uniform	2n = 6x*	20	3	PD	NA	NA	NA	NA	NA	NA	NA	NA	NA	NA	NA	NA	NA	NA	NA	NA	NA	NA	NA	NA	NA	NA
uniform	2n = 6x*	20	3	FA	NA	NA	NA	NA	NA	NA	NA	NA	NA	NA	NA	NA	NA	NA	NA	NA	NA	NA	NA	NA	NA	NA
uniform	2n = 8x*	20	3	MM	0.416871	0.396347	0.125922	0.179901	0.117651	0.0218081	0.0757662	0.05	0.03	0.13	0.12	0.19	0.19	0.2251	0.0798907	0.0828962	0.0460649	0.05972	0.0331335	0.0589809	0.0321002	0.0872486
uniform	2n = 8x*	20	3	ML	0.0649487	0.180763	0.057368	0.125826	0.0809588	0.207539	0.284339	0.2	0	0.1	0	0.1	0.2	0.458	0.0330668	0.190203	0.0243266	0.142704	-0.0280279	0.076548	0.0520473	0.231027
uniform	2n = 8x*	20	3	RI	0.0853299	0.458219	0.29838	0.0326279	0.363655	0.0256401	0.0849509	0.2	0	0	0.1	0	0.3	0.098	0.0148026	0.174747	0.00786629	0.119382	-0.0299539	0.045664	0.0370673	0.200087
uniform	2n = 8x*	20	3	LO	0.122385	0.42701	0.297903	0.0731494	0.227075	0.034496	0.0717875	0.1	0.1	0.1	0.3	0.1	0.2	0.152	0.0106427	0.159226	0.00615439	0.117985	-0.0349976	0.0472856	0.0284113	0.205679
uniform	2n = 8x*	20	3	WE	0.0931039	0.459052	0.3068	0.0400781	0.235435	0.0299268	0.0406475	0	0.1	0.1	0.2	0.2	0.2	0.14	0.018965	0.156055	0.0107389	0.108997	-0.0295615	0.0510045	0.0243012	0.192139
uniform	2n = 8x*	20	3	VR	NA	NA	NA	NA	NA	NA	NA	NA	NA	NA	NA	NA	NA	NA	NA	NA	NA	NA	NA	NA	NA	NA
uniform	2n = 8x*	20	3	PD	NA	NA	NA	NA	NA	NA	NA	NA	NA	NA	NA	NA	NA	NA	NA	NA	NA	NA	NA	NA	NA	NA
uniform	2n = 8x*	20	3	FA	NA	NA	NA	NA	NA	NA	NA	NA	NA	NA	NA	NA	NA	NA	NA	NA	NA	NA	NA	NA	NA	NA
uniform	2n = 2x	50	3	MM	0.0109375	0.00140949	9.00249e-05	0.015675	0.00219113	0.0141529	0.0926174	0.6	0.43	0.38	0.36	0.24	0.43	0.316	0.725465	0.797983	0.585324	0.773839	0.573508	0.596897	0.75897	0.7879
uniform	2n = 2x	50	3	ML	0.0152412	0.00523795	0.00934281	0.00653734	0.019499	0.0101158	0.137662	0.89	0.46	0.45	0.38	0.33	0.58	0.6218	0.777604	0.857268	0.723495	0.850434	0.713388	0.7333	0.839649	0.860548
uniform	2n = 2x	50	3	RI	0.0400072	0.0446607	0.0341134	0.0221746	0.0307832	0.00548669	0.0867264	0.2	0.6	0.5	0.6	0.4	0.3	0.306	0.706013	0.815639	0.584662	0.78767	0.545044	0.621674	0.74135	0.82652
uniform	2n = 2x	50	3	LO	0.0459694	0.00204518	0.0106132	0.0100431	0.00450462	0.0316193	0.097196	0.3	0.4	0.5	0.7	0.5	0.6	0.344	0.721744	0.839277	0.579048	0.812376	0.540121	0.615502	0.771253	0.846746
uniform	2n = 2x	50	3	WE	0.0150822	0.0433138	0.0522929	0.0241124	0.0474524	0.0145967	0.0640534	0.2	0.3	0.4	0.4	0.6	0.2	0.3	0.740121	0.847437	0.681872	0.809542	0.647929	0.713113	0.76848	0.843964
uniform	2n = 2x	50	3	VR	NA	NA	NA	NA	NA	NA	NA	NA	NA	NA	NA	NA	NA	NA	NA	NA	NA	NA	NA	NA	NA	NA
uniform	2n = 2x	50	3	PD	NA	NA	NA	NA	NA	NA	NA	NA	NA	NA	NA	NA	NA	NA	NA	NA	NA	NA	NA	NA	NA	NA
uniform	2n = 2x	50	3	FA	NA	NA	NA	NA	NA	NA	NA	NA	NA	NA	NA	NA	NA	NA	NA	NA	NA	NA	NA	NA	NA	NA
uniform	2n = 4x	50	3	MM	0.124589	0.197326	0.0172018	0.0719065	0.0295204	0.0131582	0.0906161	0.04	0.12	0.13	0.07	0.15	0.11	0.1106	0.286209	0.310549	0.198406	0.266912	0.183435	0.213284	0.236156	0.297133
uniform	2n = 4x	50	3	ML	0.109466	0.177314	0.00469443	0.042972	0.0638916	0.0648242	0.179495	0.04	0.09	0.21	0.08	0.15	0.24	0.5794	0.261196	0.304344	0.245437	0.299078	0.225536	0.265133	0.26433	0.333052
uniform	2n = 4x	50	3	RI	0.219238	0.234952	0.0417881	0.0713705	0.16938	0.091273	0.0935904	0	0.1	0.1	0.1	0.1	0.1	0.108	0.32957	0.199489	0.232277	0.157917	0.184785	0.278686	0.0627361	0.250251
uniform	2n = 4x	50	3	LO	0.1741	0.233874	0.0441409	0.0769646	0.172017	0.120047	0.102795	0.1	0.1	0.2	0	0	0.2	0.1	0.313819	0.208452	0.215113	0.178563	0.168337	0.260923	0.0760251	0.277364
uniform	2n = 4x	50	3	WE	0.220842	0.266373	0.0869169	0.105775	0.132928	0.0988895	0.0883842	0	0.1	0.2	0	0.1	0.1	0.098	0.346886	0.21228	0.255707	0.178463	0.206777	0.303362	0.0778268	0.275499
uniform	2n = 4x	50	3	VR	NA	NA	NA	NA	NA	NA	NA	NA	NA	NA	NA	NA	NA	NA	NA	NA	NA	NA	NA	NA	NA	NA
uniform	2n = 4x	50	3	PD	NA	NA	NA	NA	NA	NA	NA	NA	NA	NA	NA	NA	NA	NA	NA	NA	NA	NA	NA	NA	NA	NA
uniform	2n = 4x	50	3	FA	NA	NA	NA	NA	NA	NA	NA	NA	NA	NA	NA	NA	NA	NA	NA	NA	NA	NA	NA	NA	NA	NA
uniform	2n = 6x	50	3	MM	0.147479	0.190221	0.0197977	0.074936	0.00650557	0.0254274	0.0934531	0.1	0.12	0.11	0.11	0.14	0.09	0.0964	0.21252	0.230517	0.128646	0.175552	0.115307	0.141939	0.147222	0.203594
uniform	2n = 6x	50	3	ML	0.123713	0.16038	0.048669	0.0252692	0.048399	0.0950705	0.196078	0.17	0.15	0.17	0.12	0.14	0.21	0.4718	0.235036	0.279378	0.222165	0.272457	0.201928	0.242213	0.237414	0.306792
uniform	2n = 6x	50	3	RI	0.210727	0.0777835	0.054972	0.121278	0.0775181	0.126118	0.143394	0	0.3	0	0.2	0	0	0.078	0.0852264	-0.0123724	0.0253107	-0.00567489	0.00423115	0.0463677	-0.0615619	0.0502476
uniform	2n = 6x	50	3	LO	0.119264	0.0785611	0.0434027	0.158332	0.0662971	0.00628171	0.113109	0	0.1	0	0.1	0.3	0.1	0.152	0.26216	0.162253	0.168128	0.120842	0.123537	0.212042	0.0307394	0.208996
uniform	2n = 6x	50	3	WE	0.145221	0.090485	0.0574611	0.177794	0.094259	0.0151854	0.105683	0.1	0	0	0.1	0.2	0.1	0.13	0.288837	0.157435	0.195129	0.113589	0.148747	0.240654	0.0261593	0.199293
uniform	2n = 6x	50	3	VR	NA	NA	NA	NA	NA	NA	NA	NA	NA	NA	NA	NA	NA	NA	NA	NA	NA	NA	NA	NA	NA	NA
uniform	2n = 6x	50	3	PD	NA	NA	NA	NA	NA	NA	NA	NA	NA	NA	NA	NA	NA	NA	NA	NA	NA	NA	NA	NA	NA	NA
uniform	2n = 6x	50	3	FA	NA	NA	NA	NA	NA	NA	NA	NA	NA	NA	NA	NA	NA	NA	NA	NA	NA	NA	NA	NA	NA	NA
uniform	2n = 8x	50	3	MM	0.337287	0.380965	0.16693	0.158259	0.121577	0.062908	0.0879104	0.05	0.05	0.09	0.08	0.17	0.17	0.2604	0.0831719	0.152885	0.0515786	0.119326	0.0376714	0.0654658	0.0897148	0.148727
uniform	2n = 8x	50	3	ML	0.0264103	0.127053	0.052823	0.00457865	0.135788	0.324377	0.260522	0.1	0.3	0	0.2	0	0.1	0.478	0.0628562	0.21616	0.0454328	0.165044	-0.00597267	0.0965987	0.0732738	0.254043
uniform	2n = 8x	50	3	RI	0.182618	0.319022	0.0548336	0.155193	0.0583899	0.133787	0.0915176	0	0.1	0	0.1	0.1	0.1	0.118	0.0914317	0.123788	0.0498132	0.083687	0.0111249	0.0883526	0.00162287	0.164631
uniform	2n = 8x	50	3	LO	0.238953	0.333236	0.0899045	0.155283	0.0598853	0.0423343	0.0848265	0.1	0	0.1	0.1	0.3	0.4	0.206	0.0814098	0.167983	0.0476058	0.130178	0.00601939	0.0890278	0.0364179	0.221667
uniform	2n = 8x	50	3	WE	0.239844	0.32589	0.0943086	0.179424	0.0572947	0.0216745	0.0710555	0.1	0.2	0.2	0.1	0.5	0.2	0.198	0.0906918	0.151358	0.0536472	0.118046	0.0116093	0.0954957	0.0237159	0.210292
uniform	2n = 8x	50	3	VR	NA	NA	NA	NA	NA	NA	NA	NA	NA	NA	NA	NA	NA	NA	NA	NA	NA	NA	NA	NA	NA	NA
uniform	2n = 8x	50	3	PD	NA	NA	NA	NA	NA	NA	NA	NA	NA	NA	NA	NA	NA	NA	NA	NA	NA	NA	NA	NA	NA	NA
uniform	2n = 8x	50	3	FA	NA	NA	NA	NA	NA	NA	NA	NA	NA	NA	NA	NA	NA	NA	NA	NA	NA	NA	NA	NA	NA	NA
uniform	2n = 4x*	50	3	MM	0.0970688	0.172787	0.027407	0.0810865	0.00197734	0.00363837	0.0956771	0.02	0.12	0.11	0.05	0.08	0.12	0.11	0.295482	0.358518	0.202031	0.303738	0.187238	0.216731	0.274058	0.332841
uniform	2n = 4x*	50	3	ML	0.0874042	0.157816	0.000398709	0.0515837	0.0318173	0.0647122	0.183983	0.07	0.14	0.14	0.08	0.12	0.22	0.5742	0.26065	0.340369	0.246374	0.337915	0.226331	0.266208	0.303701	0.371258
uniform	2n = 4x*	50	3	RI	0.0526342	0.148662	0.0860408	0.246211	0.0379163	0.0905161	0.0907303	0.2	0.1	0.2	0	0.1	0.1	0.112	0.382518	0.449412	0.272983	0.374274	0.225774	0.318913	0.285328	0.456827
uniform	2n = 4x*	50	3	LO	0.0230755	0.179764	0.0888777	0.174888	0.0384822	0.0798515	0.100156	0.2	0	0.1	0	0.2	0	0.112	0.371465	0.438146	0.243769	0.372789	0.199276	0.287259	0.281758	0.457168
uniform	2n = 4x*	50	3	WE	0.0104986	0.209476	0.119913	0.207587	0.00857503	0.0508189	0.0862618	0.1	0	0.1	0	0.1	0	0.09	0.402044	0.458301	0.291138	0.382893	0.243892	0.337005	0.294132	0.465105
uniform	2n = 4x*	50	3	VR	NA	NA	NA	NA	NA	NA	NA	NA	NA	NA	NA	NA	NA	NA	NA	NA	NA	NA	NA	NA	NA	NA
uniform	2n = 4x*	50	3	PD	NA	NA	NA	NA	NA	NA	NA	NA	NA	NA	NA	NA	NA	NA	NA	NA	NA	NA	NA	NA	NA	NA
uniform	2n = 4x*	50	3	FA	NA	NA	NA	NA	NA	NA	NA	NA	NA	NA	NA	NA	NA	NA	NA	NA	NA	NA	NA	NA	NA	NA
uniform	2n = 6x*	50	3	MM	0.112096	0.238709	0.00846349	0.0556573	0.0311846	0.0626559	0.0915392	0.18	0.1	0.15	0.16	0.09	0.15	0.1058	0.198272	0.230479	0.126525	0.178054	0.11243	0.140569	0.149295	0.206512
uniform	2n = 6x*	50	3	ML	0.0957286	0.201754	0.0456489	0.0161843	0.0353541	0.0482545	0.191418	0.24	0.14	0.16	0.15	0.11	0.25	0.4846	0.249928	0.266438	0.239773	0.263241	0.219372	0.259965	0.227546	0.29823
uniform	2n = 6x*	50	3	RI	0.0904462	0.349219	0.0481876	0.0315999	0.255139	0.0567924	0.111151	0.1	0	0.1	0	0.1	0	0.08	0.0444431	0.132177	0.0123004	0.0608148	-0.00739289	0.0319842	0.00513671	0.116117
uniform	2n = 6x*	50	3	LO	0.0654544	0.274957	0.0324404	0.133489	0.0330498	0.0505222	0.0950895	0.4	0.3	0.1	0.1	0	0.1	0.116	0.24859	0.319133	0.162562	0.257662	0.117038	0.207405	0.164612	0.346168
uniform	2n = 6x*	50	3	WE	0.0717303	0.299412	0.0592518	0.121143	0.0136167	0.0760252	0.0783722	0.3	0.3	0.2	0	0	0.1	0.122	0.272945	0.328236	0.189755	0.258671	0.141983	0.236646	0.167659	0.34531
uniform	2n = 6x*	50	3	VR	NA	NA	NA	NA	NA	NA	NA	NA	NA	NA	NA	NA	NA	NA	NA	NA	NA	NA	NA	NA	NA	NA
uniform	2n = 6x*	50	3	PD	NA	NA	NA	NA	NA	NA	NA	NA	NA	NA	NA	NA	NA	NA	NA	NA	NA	NA	NA	NA	NA	NA
uniform	2n = 6x*	50	3	FA	NA	NA	NA	NA	NA	NA	NA	NA	NA	NA	NA	NA	NA	NA	NA	NA	NA	NA	NA	NA	NA	NA
uniform	2n = 8x*	50	3	MM	0.419293	0.385449	0.114234	0.194794	0.152727	0.0109883	0.0785087	0.03	0.07	0.09	0.1	0.14	0.2	0.2459	0.100633	0.0918664	0.0631667	0.071318	0.0491106	0.0771978	0.0415785	0.100931
uniform	2n = 8x*	50	3	ML	0.020416	0.134907	0.0575674	0.02105	0.00890838	0.275903	0.263424	0.2	0.2	0	0	0.2	0.2	0.458	0.0701398	0.152109	0.0520458	0.12082	-0.00071105	0.104514	0.0245088	0.21491
uniform	2n = 8x*	50	3	RI	0.0988625	0.357316	0.149701	0.112307	0.249025	0.042494	0.0783416	0	0	0.2	0.2	0.2	0.3	0.15	0.0137341	0.188214	0.00744502	0.123518	-0.031134	0.0460019	0.0443489	0.201145
uniform	2n = 8x*	50	3	LO	0.145103	0.407152	0.211958	0.16515	0.177997	0.0602738	0.0713223	0.1	0.1	0	0	0.1	0.5	0.276	0.0300361	0.141922	0.0179758	0.103445	-0.0246195	0.0605059	0.0149686	0.190313
uniform	2n = 8x*	50	3	WE	0.166191	0.428295	0.222586	0.176564	0.199567	0.0483764	0.0469531	0.2	0.1	0.1	0	0.2	0.3	0.226	0.0425693	0.143517	0.0258209	0.101	-0.0173463	0.0688921	0.0154919	0.185041
uniform	2n = 8x*	50	3	VR	NA	NA	NA	NA	NA	NA	NA	NA	NA	NA	NA	NA	NA	NA	NA	NA	NA	NA	NA	NA	NA	NA
uniform	2n = 8x*	50	3	PD	NA	NA	NA	NA	NA	NA	NA	NA	NA	NA	NA	NA	NA	NA	NA	NA	NA	NA	NA	NA	NA	NA
uniform	2n = 8x*	50	3	FA	NA	NA	NA	NA	NA	NA	NA	NA	NA	NA	NA	NA	NA	NA	NA	NA	NA	NA	NA	NA	NA	NA
uniform	2n = 2x	100	3	MM	0.00143232	0.00613443	0.00164168	0.00571901	0.00251879	0.00165043	0.0926075	0.77	0.48	0.5	0.51	0.54	0.45	0.4452	0.82353	0.881705	0.673334	0.866833	0.663418	0.683015	0.85733	0.875745
uniform	2n = 2x	100	3	ML	0.0122531	0.0113134	0.00605243	0.00357812	0.0128739	0.0170397	0.125119	0.97	0.6	0.52	0.58	0.57	0.6	0.691	0.851797	0.924638	0.765473	0.923788	0.757076	0.773616	0.917981	0.929198
uniform	2n = 2x	100	3	RI	0.00671308	0.0304959	0.0597977	0.014379	0.0371209	0.0345209	0.0819786	0.5	0.5	0.4	0.3	0.5	0.2	0.416	0.845244	0.878444	0.743929	0.869509	0.715601	0.769815	0.837692	0.895444
uniform	2n = 2x	100	3	LO	0.0295152	0.0225126	0.0226409	0.00542791	0.0111933	0.0162256	0.0916766	0.6	0.8	0.5	0.4	0.7	0.5	0.468	0.853099	0.905128	0.692576	0.899374	0.66228	0.720612	0.874276	0.919677
uniform	2n = 2x	100	3	WE	0.0120905	0.0215027	0.0647704	0.0472584	0.0553309	0.060588	0.0616723	0.6	0.7	0.4	0.3	0.5	0.2	0.44	0.879684	0.903747	0.844635	0.878297	0.826106	0.86134	0.849074	0.902161
uniform	2n = 2x	100	3	VR	NA	NA	NA	NA	NA	NA	NA	NA	NA	NA	NA	NA	NA	NA	NA	NA	NA	NA	NA	NA	NA	NA
uniform	2n = 2x	100	3	PD	NA	NA	NA	NA	NA	NA	NA	NA	NA	NA	NA	NA	NA	NA	NA	NA	NA	NA	NA	NA	NA	NA
uniform	2n = 2x	100	3	FA	NA	NA	NA	NA	NA	NA	NA	NA	NA	NA	NA	NA	NA	NA	NA	NA	NA	NA	NA	NA	NA	NA
uniform	2n = 4x	100	3	MM	0.127265	0.210809	0.0249899	0.0664321	0.0139334	0.0102598	0.0886312	0.03	0.12	0.09	0.01	0.11	0.08	0.0784	0.290671	0.345875	0.205169	0.298401	0.189941	0.220299	0.268076	0.328135
uniform	2n = 4x	100	3	ML	0.112252	0.191598	0.0138077	0.0464101	0.0363942	0.0587953	0.175694	0.02	0.12	0.14	0.05	0.12	0.25	0.6046	0.242943	0.317041	0.228156	0.313499	0.208078	0.248041	0.278851	0.347331
uniform	2n = 4x	100	3	RI	0.152921	0.239491	0.081562	0.0113343	0.118686	0.0863853	0.0904722	0	0	0.2	0.2	0.2	0	0.068	0.349252	0.269842	0.259445	0.229888	0.210024	0.307544	0.129945	0.325207
uniform	2n = 4x	100	3	LO	0.167382	0.234734	0.0889055	0.0350447	0.106731	0.0688595	0.102459	0	0	0.2	0.1	0	0	0.07	0.334104	0.284449	0.235017	0.250889	0.187231	0.281693	0.148147	0.348273
uniform	2n = 4x	100	3	WE	0.199931	0.256503	0.113611	0.0494676	0.0749245	0.0551794	0.0849524	0.1	0	0.2	0.1	0	0	0.034	0.372005	0.289783	0.289713	0.250309	0.238906	0.338938	0.149634	0.345847
uniform	2n = 4x	100	3	VR	NA	NA	NA	NA	NA	NA	NA	NA	NA	NA	NA	NA	NA	NA	NA	NA	NA	NA	NA	NA	NA	NA
uniform	2n = 4x	100	3	PD	NA	NA	NA	NA	NA	NA	NA	NA	NA	NA	NA	NA	NA	NA	NA	NA	NA	NA	NA	NA	NA	NA
uniform	2n = 4x	100	3	FA	NA	NA	NA	NA	NA	NA	NA	NA	NA	NA	NA	NA	NA	NA	NA	NA	NA	NA	NA	NA	NA	NA
uniform	2n = 6x	100	3	MM	0.149999	0.178179	0.0304096	0.0711292	0.00363682	0.0190039	0.0957942	0.14	0.11	0.18	0.08	0.13	0.05	0.0866	0.214493	0.252633	0.13302	0.198476	0.119346	0.146643	0.169484	0.227124
uniform	2n = 6x	100	3	ML	0.119466	0.161688	0.0544314	0.0208729	0.0483555	0.087255	0.191042	0.17	0.1	0.17	0.13	0.11	0.19	0.4646	0.236598	0.285627	0.226506	0.281351	0.206025	0.246789	0.246126	0.315833
uniform	2n = 6x	100	3	RI	0.00763874	0.0337397	0.145993	0.0215749	0.11781	0.105106	0.165962	0	0.2	0.1	0.1	0.2	0	0.096	0.124725	0.154688	0.047501	0.0859106	0.0204263	0.0745062	0.0188981	0.152155
uniform	2n = 6x	100	3	LO	0.0898431	0.0676758	0.0268063	0.148613	0.0255654	0.0371598	0.116043	0.3	0.4	0.1	0.1	0	0	0.094	0.231268	0.216439	0.14725	0.159145	0.102746	0.191165	0.0711605	0.244673
uniform	2n = 6x	100	3	WE	0.111679	0.0863876	0.0422256	0.174002	0.0457522	0.0608996	0.105113	0.2	0.4	0	0.2	0	0	0.064	0.253107	0.217579	0.173061	0.15865	0.125849	0.219492	0.0713741	0.243514
uniform	2n = 6x	100	3	VR	NA	NA	NA	NA	NA	NA	NA	NA	NA	NA	NA	NA	NA	NA	NA	NA	NA	NA	NA	NA	NA	NA
uniform	2n = 6x	100	3	PD	NA	NA	NA	NA	NA	NA	NA	NA	NA	NA	NA	NA	NA	NA	NA	NA	NA	NA	NA	NA	NA	NA
uniform	2n = 6x	100	3	FA	NA	NA	NA	NA	NA	NA	NA	NA	NA	NA	NA	NA	NA	NA	NA	NA	NA	NA	NA	NA	NA	NA
uniform	2n = 8x	100	3	MM	0.348278	0.387259	0.163782	0.154858	0.0858533	0.0288795	0.0844558	0.1	0.02	0.05	0.08	0.24	0.26	0.3014	0.087313	0.158467	0.0559044	0.124054	0.0415475	0.0702383	0.0943792	0.153508
uniform	2n = 8x	100	3	ML	0.0919713	0.194768	0.047354	0.0104885	0.153933	0.210109	0.246864	0.1	0.2	0.2	0	0	0	0.492	0.132678	0.188011	0.100395	0.141324	0.0469275	0.15329	0.0504285	0.229898
uniform	2n = 8x	100	3	RI	0.208261	0.29333	0.0403832	0.138635	0.040994	0.0139115	0.0874902	0	0.1	0.1	0.3	0.1	0.3	0.172	0.106628	0.180839	0.060124	0.120831	0.0200933	0.0999623	0.040355	0.199749
uniform	2n = 8x	100	3	LO	0.250987	0.343789	0.0634995	0.117453	0.0411042	0.00364282	0.0859973	0.1	0	0	0.1	0.2	0.2	0.266	0.0963146	0.210005	0.0579514	0.15933	0.0151771	0.100514	0.0683055	0.247723
uniform	2n = 8x	100	3	WE	0.263404	0.360741	0.0803945	0.142166	0.0554622	0.0230104	0.0820217	0.1	0	0.2	0.3	0.1	0.1	0.268	0.110002	0.200245	0.0681525	0.151627	0.0241658	0.111876	0.0607413	0.240019
uniform	2n = 8x	100	3	VR	NA	NA	NA	NA	NA	NA	NA	NA	NA	NA	NA	NA	NA	NA	NA	NA	NA	NA	NA	NA	NA	NA
uniform	2n = 8x	100	3	PD	NA	NA	NA	NA	NA	NA	NA	NA	NA	NA	NA	NA	NA	NA	NA	NA	NA	NA	NA	NA	NA	NA
uniform	2n = 8x	100	3	FA	NA	NA	NA	NA	NA	NA	NA	NA	NA	NA	NA	NA	NA	NA	NA	NA	NA	NA	NA	NA	NA	NA
uniform	2n = 4x*	100	3	MM	0.107327	0.183745	0.0134299	0.0636144	0.00512105	0.00953729	0.0924013	0.05	0.15	0.04	0.04	0.06	0.08	0.0758	0.307328	0.379682	0.212624	0.330057	0.197688	0.227461	0.300079	0.359384
uniform	2n = 4x*	100	3	ML	0.0927458	0.169134	0.00911555	0.0398762	0.0261311	0.0645971	0.177962	0.03	0.15	0.13	0.07	0.09	0.24	0.5962	0.255521	0.353041	0.240101	0.351763	0.220093	0.259907	0.317766	0.384857
uniform	2n = 4x*	100	3	RI	0.0126105	0.178591	0.0726077	0.131957	0.0084295	0.124208	0.0941041	0	0.1	0.1	0.3	0.1	0.1	0.08	0.347352	0.348757	0.24645	0.292846	0.198407	0.293311	0.197219	0.382954
uniform	2n = 4x*	100	3	LO	0.0124294	0.16457	0.0749396	0.149183	0.00408233	0.0848947	0.101765	0	0.1	0	0.1	0	0.1	0.062	0.333049	0.385919	0.22158	0.336787	0.175807	0.266396	0.240152	0.426813
uniform	2n = 4x*	100	3	WE	0.00612231	0.170006	0.0834097	0.166644	0.00434646	0.0775572	0.0873691	0	0.1	0.1	0.1	0	0.1	0.03	0.372018	0.393097	0.27901	0.331182	0.22925	0.327317	0.237335	0.418905
uniform	2n = 4x*	100	3	VR	NA	NA	NA	NA	NA	NA	NA	NA	NA	NA	NA	NA	NA	NA	NA	NA	NA	NA	NA	NA	NA	NA
uniform	2n = 4x*	100	3	PD	NA	NA	NA	NA	NA	NA	NA	NA	NA	NA	NA	NA	NA	NA	NA	NA	NA	NA	NA	NA	NA	NA
uniform	2n = 4x*	100	3	FA	NA	NA	NA	NA	NA	NA	NA	NA	NA	NA	NA	NA	NA	NA	NA	NA	NA	NA	NA	NA	NA	NA
uniform	2n = 6x*	100	3	MM	0.130758	0.234106	0.00634494	0.0676887	0.0210306	0.057161	0.0921694	0.13	0.11	0.19	0.1	0.11	0.14	0.0936	0.206808	0.247973	0.133783	0.196274	0.119506	0.148004	0.166985	0.225218
uniform	2n = 6x*	100	3	ML	0.114552	0.210788	0.0304414	0.0354028	0.0359337	0.0393656	0.189127	0.16	0.07	0.16	0.21	0.16	0.24	0.4892	0.243443	0.283526	0.234449	0.282453	0.21389	0.2548	0.246834	0.317309
uniform	2n = 6x*	100	3	RI	0.0296061	0.273129	0.0656861	0.292009	0.188359	0.11428	0.12564	0	0.1	0	0	0.1	0.1	0.096	0.130203	0.11404	0.0559816	0.0687132	0.0254767	0.0863824	-0.00439654	0.141092
uniform	2n = 6x*	100	3	LO	0.0784467	0.339546	0.00679587	0.0881737	0.0455257	0.0569839	0.0916693	0.4	0.2	0.2	0.5	0.2	0.1	0.098	0.186953	0.289604	0.116633	0.235349	0.0727351	0.16008	0.140759	0.325682
uniform	2n = 6x*	100	3	WE	0.0871713	0.371125	0.0236152	0.0773776	0.0262689	0.0783121	0.0766619	0.3	0.1	0.1	0.5	0.3	0	0.08	0.211181	0.302355	0.138933	0.240507	0.0930082	0.184267	0.14798	0.32886
uniform	2n = 6x*	100	3	VR	NA	NA	NA	NA	NA	NA	NA	NA	NA	NA	NA	NA	NA	NA	NA	NA	NA	NA	NA	NA	NA	NA
uniform	2n = 6x*	100	3	PD	NA	NA	NA	NA	NA	NA	NA	NA	NA	NA	NA	NA	NA	NA	NA	NA	NA	NA	NA	NA	NA	NA
uniform	2n = 6x*	100	3	FA	NA	NA	NA	NA	NA	NA	NA	NA	NA	NA	NA	NA	NA	NA	NA	NA	NA	NA	NA	NA	NA	NA
uniform	2n = 8x*	100	3	MM	0.383541	0.399523	0.128422	0.175558	0.126752	0.00689993	0.0815521	0.09	0.05	0.04	0.11	0.16	0.29	0.2767	0.104538	0.117288	0.0670124	0.0923308	0.0526598	0.0813374	0.0622589	0.122235
uniform	2n = 8x*	100	3	ML	0.0463973	0.170073	0.0483657	0.0255397	0.0849944	0.233852	0.267447	0	0.1	0.1	0.4	0.1	0	0.446	0.0823579	0.219463	0.0623731	0.17073	0.00856978	0.115816	0.0772051	0.261277
uniform	2n = 8x*	100	3	RI	0.0855368	0.4375	0.197805	0.139756	0.175795	0.0431495	0.0770942	0	0.1	0.1	0.2	0.2	0	0.168	0.0538398	0.191612	0.0298711	0.137054	-0.00960182	0.069251	0.0510207	0.221067
uniform	2n = 8x*	100	3	LO	0.125381	0.411288	0.246348	0.150037	0.160531	0.0458803	0.0724466	0.1	0.1	0	0.4	0.4	0.2	0.278	0.0410455	0.18589	0.0242128	0.140304	-0.0177702	0.0661105	0.0494202	0.228883
uniform	2n = 8x*	100	3	WE	0.141702	0.432747	0.270565	0.162362	0.166109	0.0442983	0.0522738	0.1	0.1	0	0.4	0.3	0.2	0.268	0.0473999	0.190124	0.0286473	0.139902	-0.0143624	0.0715512	0.0512309	0.226385
uniform	2n = 8x*	100	3	VR	NA	NA	NA	NA	NA	NA	NA	NA	NA	NA	NA	NA	NA	NA	NA	NA	NA	NA	NA	NA	NA	NA
uniform	2n = 8x*	100	3	PD	NA	NA	NA	NA	NA	NA	NA	NA	NA	NA	NA	NA	NA	NA	NA	NA	NA	NA	NA	NA	NA	NA
uniform	2n = 8x*	100	3	FA	NA	NA	NA	NA	NA	NA	NA	NA	NA	NA	NA	NA	NA	NA	NA	NA	NA	NA	NA	NA	NA	NA
uniform	2n = 2x	500	3	MM	0.00198499	0.00908173	0.0016082	0.00374672	0.00174918	0.00368397	0.0926727	0.98	0.92	0.86	0.91	0.83	0.92	0.7476	0.941282	0.963972	0.769521	0.955598	0.762654	0.776214	0.952202	0.958758
uniform	2n = 2x	500	3	ML	0.00526149	0.00536542	0.00222096	0.00247522	0.000199707	0.000218031	0.110693	1	0.98	0.94	0.94	0.87	0.95	0.8476	0.928897	0.976427	0.792184	0.974428	0.78547	0.798712	0.97242	0.976291
uniform	2n = 2x	500	3	RI	0.00903426	0.0193256	0.0262222	0.0180719	0.0332806	0.0150956	0.0868554	0.9	1	0.7	0.8	0.9	0.8	0.716	0.948684	0.973862	0.802647	0.96087	0.782554	0.821069	0.950962	0.968808
uniform	2n = 2x	500	3	LO	0.0018377	0.00407432	0.0187007	0.00309198	0.0144706	0.00071517	0.0984092	1	0.9	1	0.9	0.9	1	0.776	0.939606	0.97661	0.727089	0.971735	0.702673	0.749794	0.9644	0.977575
uniform	2n = 2x	500	3	WE	0.0288433	0.0234047	0.0469866	0.0396852	0.043041	0.0351978	0.067354	0.9	0.9	0.4	0.7	0.5	0.7	0.64	0.964834	0.978087	0.936043	0.953298	0.927905	0.943289	0.942213	0.962298
uniform	2n = 2x	500	3	VR	NA	NA	NA	NA	NA	NA	NA	NA	NA	NA	NA	NA	NA	NA	NA	NA	NA	NA	NA	NA	NA	NA
uniform	2n = 2x	500	3	PD	NA	NA	NA	NA	NA	NA	NA	NA	NA	NA	NA	NA	NA	NA	NA	NA	NA	NA	NA	NA	NA	NA
uniform	2n = 2x	500	3	FA	NA	NA	NA	NA	NA	NA	NA	NA	NA	NA	NA	NA	NA	NA	NA	NA	NA	NA	NA	NA	NA	NA
uniform	2n = 4x	500	3	MM	0.120286	0.202208	0.0183159	0.0673875	0.00942096	0.00480178	0.0892295	0	0.14	0	0	0	0	0.0046	0.317888	0.362988	0.22625	0.321771	0.211005	0.241385	0.291033	0.351846
uniform	2n = 4x	500	3	ML	0.110412	0.190222	0.0054574	0.0591215	0.0221732	0.0504008	0.173669	0	0.12	0	0	0	0.19	0.6108	0.245718	0.313048	0.231208	0.311097	0.211102	0.251119	0.276207	0.345169
uniform	2n = 4x	500	3	RI	0.205067	0.240791	0.113015	0.0955916	0.0785147	0.0357891	0.0928635	0	0.1	0	0	0	0	0.002	0.367088	0.28922	0.279223	0.255653	0.22883	0.328124	0.152887	0.352949
uniform	2n = 4x	500	3	LO	0.175685	0.226687	0.0902402	0.0910202	0.105259	0.0464567	0.103079	0	0	0	0	0	0	0.004	0.334284	0.305944	0.235566	0.277933	0.187586	0.282424	0.173339	0.376327
uniform	2n = 4x	500	3	WE	0.205504	0.249492	0.113914	0.109664	0.0784583	0.0308308	0.0854864	0	0.1	0	0	0	0	0	0.372477	0.31015	0.291874	0.27597	0.240567	0.341555	0.173391	0.372625
uniform	2n = 4x	500	3	VR	NA	NA	NA	NA	NA	NA	NA	NA	NA	NA	NA	NA	NA	NA	NA	NA	NA	NA	NA	NA	NA	NA
uniform	2n = 4x	500	3	PD	NA	NA	NA	NA	NA	NA	NA	NA	NA	NA	NA	NA	NA	NA	NA	NA	NA	NA	NA	NA	NA	NA
uniform	2n = 4x	500	3	FA	NA	NA	NA	NA	NA	NA	NA	NA	NA	NA	NA	NA	NA	NA	NA	NA	NA	NA	NA	NA	NA	NA
uniform	2n = 6x	500	3	MM	0.138535	0.184222	0.0278183	0.0722632	0.0062382	0.0211675	0.0947187	0.19	0.05	0.23	0.12	0.1	0.08	0.0214	0.224933	0.265918	0.142663	0.213533	0.128706	0.156564	0.184072	0.242611
uniform	2n = 6x	500	3	ML	0.123966	0.166196	0.0499915	0.0286919	0.0397371	0.0787505	0.188667	0.18	0.06	0.28	0.13	0.1	0.21	0.4574	0.244384	0.301452	0.235836	0.298189	0.215265	0.256198	0.263158	0.332434
uniform	2n = 6x	500	3	RI	0.0697627	0.113693	0.0345573	0.0800631	0.0286529	0.0860326	0.1389	0.2	0.1	0.1	0.1	0.1	0	0.162	0.151363	0.200321	0.071589	0.142274	0.0379659	0.10505	0.0573674	0.225137
uniform	2n = 6x	500	3	LO	0.126003	0.0815707	0.0184295	0.143979	0.0123118	0.0385945	0.117694	0.4	0	0	0	0	0	0.048	0.265271	0.224329	0.173049	0.16834	0.127687	0.21769	0.0787806	0.255204
uniform	2n = 6x	500	3	WE	0.149074	0.0965322	0.0365663	0.168433	0.0346537	0.0623192	0.107411	0.5	0.1	0	0.1	0	0	0.014	0.294878	0.225956	0.207899	0.165438	0.159712	0.255099	0.0779185	0.250427
uniform	2n = 6x	500	3	VR	NA	NA	NA	NA	NA	NA	NA	NA	NA	NA	NA	NA	NA	NA	NA	NA	NA	NA	NA	NA	NA	NA
uniform	2n = 6x	500	3	PD	NA	NA	NA	NA	NA	NA	NA	NA	NA	NA	NA	NA	NA	NA	NA	NA	NA	NA	NA	NA	NA	NA
uniform	2n = 6x	500	3	FA	NA	NA	NA	NA	NA	NA	NA	NA	NA	NA	NA	NA	NA	NA	NA	NA	NA	NA	NA	NA	NA	NA
uniform	2n = 8x	500	3	MM	0.349538	0.39555	0.158023	0.141541	0.0934134	0.0302645	0.0845749	0.08	0.07	0.05	0.06	0.12	0.35	0.3398	0.103892	0.161295	0.0676381	0.128874	0.0530588	0.0821885	0.0986108	0.158899
uniform	2n = 8x	500	3	ML	0.0679835	0.114278	0.0406005	0.082311	0.152686	0.244539	0.248496	0.4	0.4	0.1	0.1	0	0	0.502	0.149769	0.215538	0.112302	0.165142	0.0594157	0.16456	0.0728444	0.254635
uniform	2n = 8x	500	3	RI	0.20465	0.301303	0.0687928	0.0952749	0.0306007	0.0275256	0.0895963	0.2	0.1	0.2	0	0.2	0	0.308	0.10328	0.178773	0.0587697	0.122343	0.0183607	0.098987	0.0398964	0.203135
uniform	2n = 8x	500	3	LO	0.238744	0.344318	0.0855921	0.125678	0.0534357	0.0158682	0.0840211	0.2	0	0.3	0.2	0.1	0.2	0.38	0.100648	0.20437	0.0601187	0.157163	0.017652	0.102369	0.0647344	0.246918
uniform	2n = 8x	500	3	WE	0.23999	0.347474	0.0843811	0.129984	0.0555176	0.0107267	0.0786367	0.3	0	0.4	0.4	0.1	0.1	0.388	0.112751	0.201658	0.0702981	0.153482	0.0260232	0.114298	0.0620809	0.24233
uniform	2n = 8x	500	3	VR	NA	NA	NA	NA	NA	NA	NA	NA	NA	NA	NA	NA	NA	NA	NA	NA	NA	NA	NA	NA	NA	NA
uniform	2n = 8x	500	3	PD	NA	NA	NA	NA	NA	NA	NA	NA	NA	NA	NA	NA	NA	NA	NA	NA	NA	NA	NA	NA	NA	NA
uniform	2n = 8x	500	3	FA	NA	NA	NA	NA	NA	NA	NA	NA	NA	NA	NA	NA	NA	NA	NA	NA	NA	NA	NA	NA	NA	NA
uniform	2n = 4x*	500	3	MM	0.0988959	0.187727	0.00861879	0.0656583	0.00265649	0.0108108	0.0934268	0	0.17	0	0	0.01	0.01	0.0056	0.329561	0.404173	0.231742	0.355891	0.216666	0.246708	0.326049	0.385024
uniform	2n = 4x*	500	3	ML	0.092803	0.180586	0.00393924	0.0526573	0.0210332	0.0532873	0.176186	0	0.19	0	0	0.01	0.13	0.6002	0.251731	0.361465	0.236204	0.360562	0.216173	0.256037	0.326751	0.393451
uniform	2n = 4x*	500	3	RI	0.0195877	0.189669	0.0964755	0.140696	0.00821022	0.0272859	0.088414	0	0.2	0.1	0	0	0	0.006	0.41549	0.449353	0.307458	0.389949	0.258921	0.354445	0.297463	0.475185
uniform	2n = 4x*	500	3	LO	0.00532315	0.189287	0.0949328	0.124397	0.00280366	0.0433444	0.0992603	0	0.2	0	0	0	0	0.006	0.371211	0.441466	0.249792	0.38935	0.20405	0.294446	0.295378	0.475861
uniform	2n = 4x*	500	3	WE	0.0201367	0.206168	0.116959	0.149782	0.016201	0.024414	0.0828653	0	0.2	0	0	0	0	0	0.413154	0.453782	0.315675	0.388355	0.266227	0.363465	0.296894	0.472756
uniform	2n = 4x*	500	3	VR	NA	NA	NA	NA	NA	NA	NA	NA	NA	NA	NA	NA	NA	NA	NA	NA	NA	NA	NA	NA	NA	NA
uniform	2n = 4x*	500	3	PD	NA	NA	NA	NA	NA	NA	NA	NA	NA	NA	NA	NA	NA	NA	NA	NA	NA	NA	NA	NA	NA	NA
uniform	2n = 4x*	500	3	FA	NA	NA	NA	NA	NA	NA	NA	NA	NA	NA	NA	NA	NA	NA	NA	NA	NA	NA	NA	NA	NA	NA
uniform	2n = 6x*	500	3	MM	0.129847	0.227334	0.006984	0.0679698	0.0358592	0.0645131	0.0937982	0.17	0.06	0.09	0.19	0.05	0	0.0282	0.224291	0.263218	0.148699	0.212264	0.134112	0.163221	0.182595	0.241547
uniform	2n = 6x*	500	3	ML	0.121336	0.204963	0.0291201	0.0327936	0.0165343	0.0356421	0.186477	0.12	0.01	0.17	0.22	0.08	0.18	0.4748	0.254942	0.293248	0.245674	0.292932	0.225198	0.265933	0.257434	0.327641
uniform	2n = 6x*	500	3	RI	0.0394867	0.340009	0.121016	0.138654	0.0485428	0.0150965	0.137629	0.2	0.1	0.1	0.2	0.1	0.1	0.116	0.0809344	0.197783	0.0384207	0.153589	0.00464393	0.0721098	0.0606959	0.243844
uniform	2n = 6x*	500	3	LO	0.10981	0.321604	0.0150057	0.0853268	0.0187166	0.0553665	0.0911677	0.5	0.1	0	0.3	0	0.1	0.038	0.190561	0.305916	0.122147	0.254417	0.0770416	0.166754	0.158092	0.345945
uniform	2n = 6x*	500	3	WE	0.120309	0.343246	0.0375517	0.0691144	0.00458079	0.0752157	0.0766479	0.5	0.1	0	0.4	0	0	0.006	0.218737	0.316092	0.149794	0.255601	0.102058	0.196842	0.161807	0.344818
uniform	2n = 6x*	500	3	VR	NA	NA	NA	NA	NA	NA	NA	NA	NA	NA	NA	NA	NA	NA	NA	NA	NA	NA	NA	NA	NA	NA
uniform	2n = 6x*	500	3	PD	NA	NA	NA	NA	NA	NA	NA	NA	NA	NA	NA	NA	NA	NA	NA	NA	NA	NA	NA	NA	NA	NA
uniform	2n = 6x*	500	3	FA	NA	NA	NA	NA	NA	NA	NA	NA	NA	NA	NA	NA	NA	NA	NA	NA	NA	NA	NA	NA	NA	NA
uniform	2n = 8x*	500	3	MM	0.404463	0.390162	0.128216	0.185384	0.138879	0.000669712	0.0813319	0.05	0.05	0.04	0.1	0.14	0.35	0.3036	0.111791	0.122333	0.0727673	0.0982905	0.058201	0.0873026	0.0676205	0.128775
uniform	2n = 8x*	500	3	ML	0.05566	0.11841	0.00359725	0.0553515	0.0335119	0.217792	0.257981	0.5	0.1	0	0.2	0.2	0	0.446	0.122292	0.167026	0.0947658	0.128725	0.0399277	0.149035	0.0352805	0.219938
uniform	2n = 8x*	500	3	RI	0.118683	0.371169	0.268118	0.0912606	0.191894	0.0641684	0.077331	0	0	0	0	0.1	0.1	0.318	0.0721085	0.171302	0.0429366	0.119733	0.000600078	0.0851195	0.0352902	0.202479
uniform	2n = 8x*	500	3	LO	0.159343	0.402525	0.242689	0.128899	0.162548	0.0415485	0.0745914	0	0	0	0.5	0	0.2	0.388	0.0479599	0.164498	0.0288963	0.123668	-0.0139798	0.0716664	0.0327378	0.212567
uniform	2n = 8x*	500	3	WE	0.177823	0.404225	0.258902	0.140464	0.177732	0.0332803	0.0621323	0.1	0.1	0	0.4	0	0.1	0.402	0.0591261	0.172294	0.0365527	0.125229	-0.0074283	0.0803926	0.0372721	0.21126
uniform	2n = 8x*	500	3	VR	NA	NA	NA	NA	NA	NA	NA	NA	NA	NA	NA	NA	NA	NA	NA	NA	NA	NA	NA	NA	NA	NA
uniform	2n = 8x*	500	3	PD	NA	NA	NA	NA	NA	NA	NA	NA	NA	NA	NA	NA	NA	NA	NA	NA	NA	NA	NA	NA	NA	NA
uniform	2n = 8x*	500	3	FA	NA	NA	NA	NA	NA	NA	NA	NA	NA	NA	NA	NA	NA	NA	NA	NA	NA	NA	NA	NA	NA	NA
uniform	2n = 2x	1000	3	MM	0.00225204	0.002145	0.00215103	0.00359369	0.00395289	0.00428499	0.0919863	1	0.96	0.98	0.98	0.98	0.97	0.8306	0.957731	0.97697	0.778118	0.967841	0.771695	0.784383	0.965389	0.970121
uniform	2n = 2x	1000	3	ML	0.00363378	0.00225669	6.71194e-05	0.00252725	0.000405495	0.000165065	0.107684	1	1	0.97	0.98	0.99	0.98	0.8848	0.938333	0.984745	0.791947	0.981446	0.785395	0.798321	0.979994	0.982794
uniform	2n = 2x	1000	3	RI	0.0135259	0.00339959	0.010978	0.0173371	0.0192456	0.0173688	0.0865837	1	1	0.9	0.9	0.8	0.7	0.818	0.969165	0.983015	0.837817	0.970026	0.821275	0.852952	0.96246	0.976085
uniform	2n = 2x	1000	3	LO	0.00897132	0.00505895	0.000467491	0.00282679	0.00159213	3.0243e-05	0.0994453	1	0.8	0.9	1	0.9	0.9	0.838	0.958311	0.986508	0.746123	0.982632	0.72367	0.766997	0.978031	0.986277
uniform	2n = 2x	1000	3	WE	0.027735	0.0272082	0.0337914	0.0359483	0.0331664	0.0368576	0.0671935	1	0.8	0.7	0.8	0.7	0.5	0.684	0.980704	0.986255	0.957849	0.953534	0.952667	0.962475	0.943204	0.962022
uniform	2n = 2x	1000	3	VR	NA	NA	NA	NA	NA	NA	NA	NA	NA	NA	NA	NA	NA	NA	NA	NA	NA	NA	NA	NA	NA	NA
uniform	2n = 2x	1000	3	PD	NA	NA	NA	NA	NA	NA	NA	NA	NA	NA	NA	NA	NA	NA	NA	NA	NA	NA	NA	NA	NA	NA
uniform	2n = 2x	1000	3	FA	NA	NA	NA	NA	NA	NA	NA	NA	NA	NA	NA	NA	NA	NA	NA	NA	NA	NA	NA	NA	NA	NA
uniform	2n = 4x	1000	3	MM	0.11914	0.199721	0.019757	0.0620525	0.0102418	0.0059035	0.0889013	0	0.11	0	0	0	0	0.001	0.31458	0.367367	0.223673	0.326858	0.208423	0.238814	0.296106	0.356933
uniform	2n = 4x	1000	3	ML	0.111727	0.191465	0.0069467	0.0566446	0.0238182	0.0486647	0.173159	0	0.1	0.01	0	0	0.19	0.6108	0.241064	0.315465	0.226825	0.313737	0.206676	0.246782	0.278878	0.347771
uniform	2n = 4x	1000	3	RI	0.188302	0.250753	0.0993388	0.081864	0.092551	0.0375995	0.0918864	0	0	0	0	0	0	0	0.366437	0.324766	0.28147	0.290916	0.230745	0.330669	0.188537	0.38704
uniform	2n = 4x	1000	3	LO	0.160087	0.219803	0.08431	0.073992	0.118608	0.052041	0.101188	0	0	0.1	0	0	0	0	0.331362	0.318409	0.233939	0.290643	0.185912	0.280852	0.186189	0.388601
uniform	2n = 4x	1000	3	WE	0.190162	0.244964	0.109959	0.0919043	0.0871742	0.0327709	0.0851703	0	0	0	0	0	0	0	0.368396	0.323538	0.288229	0.289138	0.236983	0.337875	0.186747	0.385316
uniform	2n = 4x	1000	3	VR	NA	NA	NA	NA	NA	NA	NA	NA	NA	NA	NA	NA	NA	NA	NA	NA	NA	NA	NA	NA	NA	NA
uniform	2n = 4x	1000	3	PD	NA	NA	NA	NA	NA	NA	NA	NA	NA	NA	NA	NA	NA	NA	NA	NA	NA	NA	NA	NA	NA	NA
uniform	2n = 4x	1000	3	FA	NA	NA	NA	NA	NA	NA	NA	NA	NA	NA	NA	NA	NA	NA	NA	NA	NA	NA	NA	NA	NA	NA
uniform	2n = 6x	1000	3	MM	0.134426	0.183792	0.0255275	0.0703565	0.00367867	0.0191621	0.0956146	0.18	0.11	0.19	0.11	0.05	0.04	0.008	0.223702	0.268329	0.141987	0.216352	0.128014	0.155903	0.1868	0.245514
uniform	2n = 6x	1000	3	ML	0.122627	0.167316	0.0484873	0.0300356	0.0385185	0.074798	0.189282	0.17	0.06	0.25	0.1	0.1	0.19	0.457	0.238964	0.300433	0.230925	0.297642	0.210276	0.251368	0.262544	0.331953
uniform	2n = 6x	1000	3	RI	0.0842973	0.074443	0.0749038	0.150298	0.0548832	0.0105106	0.147158	0	0.1	0.1	0	0	0.1	0.114	0.157919	0.217905	0.0747162	0.164057	0.0411095	0.108154	0.0743965	0.251085
uniform	2n = 6x	1000	3	LO	0.124367	0.0704369	0.0106656	0.140795	0.00707461	0.0257603	0.114745	0.3	0.1	0	0	0	0	0.014	0.259863	0.226744	0.167388	0.168046	0.12257	0.211524	0.0796102	0.253857
uniform	2n = 6x	1000	3	WE	0.14946	0.0853976	0.0289137	0.166149	0.0307638	0.0497101	0.105551	0.5	0.1	0	0.1	0	0	0	0.289096	0.228603	0.200598	0.165644	0.153102	0.247169	0.0790617	0.249746
uniform	2n = 6x	1000	3	VR	NA	NA	NA	NA	NA	NA	NA	NA	NA	NA	NA	NA	NA	NA	NA	NA	NA	NA	NA	NA	NA	NA
uniform	2n = 6x	1000	3	PD	NA	NA	NA	NA	NA	NA	NA	NA	NA	NA	NA	NA	NA	NA	NA	NA	NA	NA	NA	NA	NA	NA
uniform	2n = 6x	1000	3	FA	NA	NA	NA	NA	NA	NA	NA	NA	NA	NA	NA	NA	NA	NA	NA	NA	NA	NA	NA	NA	NA	NA
uniform	2n = 8x	1000	3	MM	0.348228	0.391633	0.166751	0.147423	0.104814	0.0332838	0.0857431	0.07	0.13	0.02	0.03	0.09	0.34	0.3334	0.102457	0.173523	0.0666467	0.138331	0.0520788	0.0811864	0.108215	0.168194
uniform	2n = 8x	1000	3	ML	0.0663384	0.133409	0.0789155	0.0809252	0.0994997	0.258548	0.247643	0.4	0.4	0	0.1	0	0	0.518	0.148397	0.267871	0.112015	0.205982	0.0587607	0.164633	0.11441	0.294084
uniform	2n = 8x	1000	3	RI	0.204953	0.315492	0.0576796	0.111564	0.0472088	0.0522681	0.0886269	0	0.1	0.2	0.2	0	0.3	0.36	0.107853	0.178322	0.0614431	0.122078	0.0210012	0.101684	0.0395535	0.202949
uniform	2n = 8x	1000	3	LO	0.246746	0.354931	0.0809107	0.125915	0.0528403	0.0294563	0.0846204	0.3	0	0.2	0.2	0.1	0.2	0.382	0.104818	0.195048	0.0626228	0.149367	0.0201614	0.104859	0.0571728	0.239035
uniform	2n = 8x	1000	3	WE	0.248586	0.3489	0.0819497	0.132961	0.0449555	0.0321353	0.0798077	0.3	0	0.4	0.4	0	0.3	0.424	0.117109	0.191553	0.0733706	0.144041	0.0289056	0.117546	0.0534997	0.232234
uniform	2n = 8x	1000	3	VR	NA	NA	NA	NA	NA	NA	NA	NA	NA	NA	NA	NA	NA	NA	NA	NA	NA	NA	NA	NA	NA	NA
uniform	2n = 8x	1000	3	PD	NA	NA	NA	NA	NA	NA	NA	NA	NA	NA	NA	NA	NA	NA	NA	NA	NA	NA	NA	NA	NA	NA
uniform	2n = 8x	1000	3	FA	NA	NA	NA	NA	NA	NA	NA	NA	NA	NA	NA	NA	NA	NA	NA	NA	NA	NA	NA	NA	NA	NA
uniform	2n = 4x*	1000	3	MM	0.0999762	0.187219	0.00904924	0.0669462	0.00217943	0.00947819	0.0933184	0.01	0.16	0	0	0	0	0.0006	0.332162	0.40043	0.233213	0.351956	0.218169	0.248146	0.322069	0.381143
uniform	2n = 4x*	1000	3	ML	0.0926132	0.179457	0.00294514	0.0559439	0.0181868	0.0513747	0.175856	0.01	0.15	0	0	0	0.13	0.6002	0.249926	0.353879	0.234483	0.35302	0.214437	0.25433	0.319005	0.386127
uniform	2n = 4x*	1000	3	RI	0.0136988	0.189852	0.0767315	0.154796	0.00909868	0.0408731	0.0885544	0	0.2	0	0	0	0	0.002	0.415808	0.455821	0.310774	0.396363	0.261789	0.358162	0.303739	0.481566
uniform	2n = 4x*	1000	3	LO	0.000997756	0.184109	0.0777699	0.145072	0.0216762	0.0637703	0.0986771	0	0.2	0	0	0	0	0	0.374632	0.437646	0.25371	0.389012	0.207749	0.298553	0.294162	0.476273
uniform	2n = 4x*	1000	3	WE	0.0199581	0.201817	0.097165	0.164729	0.00677419	0.0501677	0.0819876	0	0.2	0	0	0	0	0	0.413615	0.454738	0.318352	0.39136	0.268624	0.366387	0.299488	0.476041
uniform	2n = 4x*	1000	3	VR	NA	NA	NA	NA	NA	NA	NA	NA	NA	NA	NA	NA	NA	NA	NA	NA	NA	NA	NA	NA	NA	NA
uniform	2n = 4x*	1000	3	PD	NA	NA	NA	NA	NA	NA	NA	NA	NA	NA	NA	NA	NA	NA	NA	NA	NA	NA	NA	NA	NA	NA
uniform	2n = 4x*	1000	3	FA	NA	NA	NA	NA	NA	NA	NA	NA	NA	NA	NA	NA	NA	NA	NA	NA	NA	NA	NA	NA	NA	NA
uniform	2n = 6x*	1000	3	MM	0.13251	0.226489	0.00846187	0.0653172	0.0331971	0.0605523	0.0923033	0.18	0.03	0.11	0.17	0.05	0.02	0.0084	0.220286	0.2635	0.145952	0.21255	0.131362	0.16048	0.182864	0.241848
uniform	2n = 6x*	1000	3	ML	0.120975	0.206264	0.0322313	0.0308713	0.0193307	0.0370561	0.186566	0.11	0.02	0.24	0.22	0.13	0.22	0.4736	0.248725	0.294636	0.239762	0.294361	0.219219	0.260092	0.258888	0.329041
uniform	2n = 6x*	1000	3	RI	0.160392	0.238429	0.035305	0.0514746	0.00193321	0.0388588	0.131711	0.2	0	0	0.2	0.2	0.1	0.126	0.107988	0.298914	0.0549477	0.245131	0.018771	0.0909807	0.150557	0.335259
uniform	2n = 6x*	1000	3	LO	0.11198	0.316681	9.93967e-05	0.0849469	0.0245949	0.0559736	0.0930768	0.5	0.3	0.1	0.1	0	0	0.022	0.196465	0.316072	0.126965	0.262987	0.0815586	0.171845	0.167116	0.35393
uniform	2n = 6x*	1000	3	WE	0.11999	0.338949	0.0227414	0.0706275	0.0102999	0.0765786	0.0794574	0.5	0.2	0	0.2	0	0	0	0.224637	0.323844	0.154935	0.261801	0.106966	0.202185	0.168374	0.350566
uniform	2n = 6x*	1000	3	VR	NA	NA	NA	NA	NA	NA	NA	NA	NA	NA	NA	NA	NA	NA	NA	NA	NA	NA	NA	NA	NA	NA
uniform	2n = 6x*	1000	3	PD	NA	NA	NA	NA	NA	NA	NA	NA	NA	NA	NA	NA	NA	NA	NA	NA	NA	NA	NA	NA	NA	NA
uniform	2n = 6x*	1000	3	FA	NA	NA	NA	NA	NA	NA	NA	NA	NA	NA	NA	NA	NA	NA	NA	NA	NA	NA	NA	NA	NA	NA
uniform	2n = 8x*	1000	3	MM	0.408064	0.380182	0.122791	0.190028	0.137573	0.0188909	0.0805083	0.05	0.09	0.03	0.07	0.16	0.31	0.3134	0.114529	0.129368	0.0747037	0.102736	0.060113	0.0892624	0.072454	0.132828
uniform	2n = 8x*	1000	3	ML	0.0584302	0.128984	0.0151223	0.0338115	0.0404911	0.25019	0.260928	0.4	0.2	0	0.3	0.1	0	0.436	0.134732	0.213473	0.101782	0.162689	0.0483788	0.154606	0.070826	0.251815
uniform	2n = 8x*	1000	3	RI	0.141449	0.3779	0.227182	0.108044	0.205668	0.0472804	0.0758997	0	0	0	0.2	0.3	0.1	0.374	0.0593061	0.186205	0.0348968	0.132786	-0.00696124	0.0766327	0.0468394	0.21678
uniform	2n = 8x*	1000	3	LO	0.157945	0.406376	0.239955	0.124583	0.170754	0.0404056	0.073018	0.1	0.1	0	0.5	0.2	0.4	0.414	0.0489659	0.172105	0.0293909	0.130472	-0.0133231	0.0719978	0.0388779	0.219892
uniform	2n = 8x*	1000	3	WE	0.182661	0.42015	0.264934	0.144079	0.19289	0.0234912	0.0573854	0.2	0.1	0	0.4	0	0.3	0.432	0.0616364	0.178426	0.0379418	0.130634	-0.00584957	0.0815879	0.0420928	0.217139
uniform	2n = 8x*	1000	3	VR	NA	NA	NA	NA	NA	NA	NA	NA	NA	NA	NA	NA	NA	NA	NA	NA	NA	NA	NA	NA	NA	NA
uniform	2n = 8x*	1000	3	PD	NA	NA	NA	NA	NA	NA	NA	NA	NA	NA	NA	NA	NA	NA	NA	NA	NA	NA	NA	NA	NA	NA
uniform	2n = 8x*	1000	3	FA	NA	NA	NA	NA	NA	NA	NA	NA	NA	NA	NA	NA	NA	NA	NA	NA	NA	NA	NA	NA	NA	NA
uniform	2n = 2x	5	4	MM	0.00837938	0.0193544	0.00328558	0.0262061	0.00143241	0.00969001	0.088649	0.19	0.1	0.17	0.15	0.11	0.14	0.1126	0.367749	0.445652	0.224638	0.328265	0.211949	0.237252	0.304014	0.352091
uniform	2n = 2x	5	4	ML	0.0490317	0.0434356	0.0793015	0.0598816	0.106111	0.107412	0.214417	0.55	0.2	0.13	0.12	0.13	0.32	0.5188	0.397393	0.500246	0.320969	0.408206	0.305005	0.336752	0.382143	0.433621
uniform	2n = 2x	5	4	RI	0.0391007	0.0434268	0.0209143	0.0644753	0.00847999	0.052726	0.103052	0.2	0.3	0	0.2	0.2	0.2	0.12	0.384496	0.417336	0.259084	0.297553	0.21561	0.301533	0.219875	0.371482
uniform	2n = 2x	5	4	LO	0.122314	0.0138694	0.0671958	0.0556745	0.020193	0.00604399	0.115424	0.1	0	0	0	0	0.2	0.126	0.366997	0.436312	0.234192	0.341002	0.192319	0.275213	0.257546	0.419408
uniform	2n = 2x	5	4	WE	0.0849715	0.0450426	0.0584003	0.00886779	0.00767157	0.0159421	0.0683848	0.1	0.3	0.3	0.2	0	0.2	0.154	0.391793	0.435943	0.232477	0.327588	0.194248	0.27	0.246247	0.404346
uniform	2n = 2x	5	4	VR	NA	NA	NA	NA	NA	NA	NA	NA	NA	NA	NA	NA	NA	NA	NA	NA	NA	NA	NA	NA	NA	NA
uniform	2n = 2x	5	4	PD	NA	NA	NA	NA	NA	NA	NA	NA	NA	NA	NA	NA	NA	NA	NA	NA	NA	NA	NA	NA	NA	NA
uniform	2n = 2x	5	4	FA	NA	NA	NA	NA	NA	NA	NA	NA	NA	NA	NA	NA	NA	NA	NA	NA	NA	NA	NA	NA	NA	NA
uniform	2n = 4x	5	4	MM	0.138189	0.17195	0.038006	0.0418045	0.0080269	0.0171566	0.101722	0.17	0.13	0.19	0.08	0.11	0.1	0.101	0.182671	0.218409	0.101444	0.15201	0.0891609	0.113697	0.126051	0.177761
uniform	2n = 4x	5	4	ML	0.0893443	0.118329	0.0860252	0.046366	0.0901097	0.131319	0.236582	0.3	0.2	0.24	0.23	0.13	0.19	0.4736	0.19186	0.237226	0.156389	0.198306	0.138545	0.174131	0.167258	0.22896
uniform	2n = 4x	5	4	RI	0.210821	0.129365	0.138918	0.0707699	0.0329874	0.0899158	0.140623	0.3	0.2	0.1	0	0	0.2	0.09	0.0784091	0.0694028	0.0238201	0.0348306	0.00222997	0.045388	-0.0262769	0.0956789
uniform	2n = 4x	5	4	LO	0.0808142	0.167441	0.121063	0.0781593	0.0758062	0.136519	0.0870882	0.2	0.1	0.2	0.1	0.3	0	0.126	0.213214	0.242358	0.126946	0.202577	0.0852089	0.168238	0.103587	0.297593
uniform	2n = 4x	5	4	WE	0.0747326	0.173714	0.130206	0.0643829	0.0727007	0.113555	0.0841397	0.2	0.2	0.2	0	0.1	0.3	0.138	0.221879	0.236455	0.138573	0.191292	0.0951139	0.181505	0.0950603	0.283982
uniform	2n = 4x	5	4	VR	NA	NA	NA	NA	NA	NA	NA	NA	NA	NA	NA	NA	NA	NA	NA	NA	NA	NA	NA	NA	NA	NA
uniform	2n = 4x	5	4	PD	NA	NA	NA	NA	NA	NA	NA	NA	NA	NA	NA	NA	NA	NA	NA	NA	NA	NA	NA	NA	NA	NA
uniform	2n = 4x	5	4	FA	NA	NA	NA	NA	NA	NA	NA	NA	NA	NA	NA	NA	NA	NA	NA	NA	NA	NA	NA	NA	NA	NA
uniform	2n = 6x	5	4	MM	0.199763	0.234953	0.0135204	0.117199	0.0620421	0.0686111	0.0984353	0.16	0.06	0.16	0.08	0.12	0.11	0.0935	0.134156	0.169078	0.0669422	0.108258	0.0558082	0.0780595	0.0840406	0.132347
uniform	2n = 6x	5	4	ML	0.156897	0.167942	0.0535605	0.0103251	0.0657622	0.0938581	0.238604	0.15	0.13	0.07	0.11	0.12	0.16	0.4588	0.138022	0.177729	0.113476	0.150179	0.0952386	0.131638	0.118292	0.181757
uniform	2n = 6x	5	4	RI	0.0888078	0.30388	0.0189002	0.243045	0.134544	0.0901271	0.0886015	0.1	0.2	0	0	0.2	0	0.104	0.21172	0.123804	0.106096	0.083171	0.0710319	0.140897	0.0017301	0.163516
uniform	2n = 6x	5	4	LO	0.0701893	0.31725	0.0343006	0.203299	0.0774391	0.128874	0.0917002	0.2	0.1	0.2	0	0.3	0.1	0.138	0.221205	0.0973841	0.12536	0.0756596	0.0856362	0.164686	-0.0188178	0.168798
uniform	2n = 6x	5	4	WE	0.0805002	0.315264	0.041547	0.199008	0.0938804	0.130713	0.0838437	0.2	0.2	0.1	0	0.1	0.1	0.094	0.229534	0.117384	0.133924	0.0906426	0.0932556	0.174146	-0.00309475	0.182801
uniform	2n = 6x	5	4	VR	NA	NA	NA	NA	NA	NA	NA	NA	NA	NA	NA	NA	NA	NA	NA	NA	NA	NA	NA	NA	NA	NA
uniform	2n = 6x	5	4	PD	NA	NA	NA	NA	NA	NA	NA	NA	NA	NA	NA	NA	NA	NA	NA	NA	NA	NA	NA	NA	NA	NA
uniform	2n = 6x	5	4	FA	NA	NA	NA	NA	NA	NA	NA	NA	NA	NA	NA	NA	NA	NA	NA	NA	NA	NA	NA	NA	NA	NA
uniform	2n = 8x	5	4	MM	0.336425	0.408786	0.166282	0.189368	0.0106634	0.0659158	0.103499	0.07	0.05	0.07	0.14	0.1	0.14	0.1378	0.0530156	0.100721	0.0265069	0.0613605	0.0152794	0.0377277	0.0380565	0.0845978
uniform	2n = 8x	5	4	ML	0.171158	0.158742	0.00729038	0.083442	0.283796	0.0220346	0.280247	0.1	0	0.1	0	0	0.1	0.426	0.0459823	0.192914	0.031069	0.140724	-0.0170089	0.0790037	0.0526405	0.226635
uniform	2n = 8x	5	4	RI	0.284777	0.287262	0.133478	0.316422	0.275514	0.330225	0.110761	0.2	0.1	0	0.1	0.1	0.1	0.092	0.0904057	0.178154	0.0437195	0.107852	0.00939392	0.0779422	0.0349168	0.179645
uniform	2n = 8x	5	4	LO	0.337373	0.27458	0.181139	0.285095	0.223001	0.275891	0.0929729	0	0.1	0.1	0.1	0.3	0.1	0.134	0.0473739	0.246038	0.0280874	0.184121	-0.0141033	0.0701784	0.0953283	0.270006
uniform	2n = 8x	5	4	WE	0.339478	0.270014	0.191209	0.285428	0.221162	0.275958	0.0568687	0.1	0.2	0.1	0	0.2	0	0.126	0.0479231	0.210072	0.0280935	0.147288	-0.0136057	0.0696952	0.0630188	0.229471
uniform	2n = 8x	5	4	VR	NA	NA	NA	NA	NA	NA	NA	NA	NA	NA	NA	NA	NA	NA	NA	NA	NA	NA	NA	NA	NA	NA
uniform	2n = 8x	5	4	PD	NA	NA	NA	NA	NA	NA	NA	NA	NA	NA	NA	NA	NA	NA	NA	NA	NA	NA	NA	NA	NA	NA
uniform	2n = 8x	5	4	FA	NA	NA	NA	NA	NA	NA	NA	NA	NA	NA	NA	NA	NA	NA	NA	NA	NA	NA	NA	NA	NA	NA
uniform	2n = 4x*	5	4	MM	0.183234	0.209944	0.0467959	0.0667985	0.0111127	0.0420371	0.10881	0.14	0.13	0.14	0.17	0.13	0.11	0.1058	0.180501	0.239152	0.103187	0.167331	0.0905339	0.115807	0.141379	0.193053
uniform	2n = 4x*	5	4	ML	0.136903	0.13886	0.0946455	0.0116877	0.103863	0.102183	0.238411	0.27	0.19	0.24	0.21	0.1	0.18	0.465	0.189867	0.23856	0.158374	0.205428	0.140114	0.176527	0.173549	0.236877
uniform	2n = 4x*	5	4	RI	0.0876566	0.193486	0.056432	0.0569729	0.320127	0.0982876	0.0814964	0.2	0.1	0	0.1	0	0.2	0.116	0.0639063	0.193814	0.016532	0.0908855	-0.0018585	0.0349113	0.0347376	0.146461
uniform	2n = 4x*	5	4	LO	0.208803	0.258609	0.0250226	0.136679	0.0961376	0.172922	0.0839879	0	0.1	0	0	0.3	0.1	0.138	0.155754	0.253797	0.0928523	0.178861	0.0507195	0.134655	0.0953373	0.259884
uniform	2n = 4x*	5	4	WE	0.227668	0.28393	0.056921	0.158404	0.108103	0.187748	0.0722366	0	0.1	0.4	0	0.2	0.3	0.14	0.183077	0.254393	0.113505	0.169672	0.0699808	0.156599	0.0900759	0.247114
uniform	2n = 4x*	5	4	VR	NA	NA	NA	NA	NA	NA	NA	NA	NA	NA	NA	NA	NA	NA	NA	NA	NA	NA	NA	NA	NA	NA
uniform	2n = 4x*	5	4	PD	NA	NA	NA	NA	NA	NA	NA	NA	NA	NA	NA	NA	NA	NA	NA	NA	NA	NA	NA	NA	NA	NA
uniform	2n = 4x*	5	4	FA	NA	NA	NA	NA	NA	NA	NA	NA	NA	NA	NA	NA	NA	NA	NA	NA	NA	NA	NA	NA	NA	NA
uniform	2n = 6x*	5	4	MM	0.20712	0.279486	0.0055656	0.116823	0.0705279	0.0337086	0.104526	0.16	0.13	0.1	0.11	0.14	0.16	0.093	0.147675	0.154347	0.0761547	0.0989842	0.0646732	0.0876161	0.0746488	0.123202
uniform	2n = 6x*	5	4	ML	0.133651	0.177346	0.0754279	0.0183272	0.0619272	0.122451	0.240251	0.22	0.12	0.09	0.1	0.13	0.22	0.4582	0.150829	0.171561	0.126279	0.149948	0.107766	0.144705	0.116955	0.182611
uniform	2n = 6x*	5	4	RI	0.155301	0.212946	0.00445499	0.0501593	0.0153912	0.0937218	0.0917207	0.3	0	0.3	0.1	0	0.1	0.118	0.131372	0.0141845	0.0662117	0.00920439	0.030529	0.101726	-0.0698584	0.0881523
uniform	2n = 6x*	5	4	LO	0.181199	0.215479	0.0368215	0.00971593	0.122102	0.0670946	0.095978	0	0.2	0	0.3	0.3	0.1	0.102	0.180081	0.102164	0.0945741	0.0697381	0.0575808	0.131308	-0.013287	0.151808
uniform	2n = 6x*	5	4	WE	0.186369	0.202054	0.0316326	0.00261623	0.120591	0.0727443	0.0827792	0.1	0.3	0.1	0.3	0.1	0	0.09	0.200992	0.105238	0.110925	0.0696138	0.0723627	0.149155	-0.0108595	0.149191
uniform	2n = 6x*	5	4	VR	NA	NA	NA	NA	NA	NA	NA	NA	NA	NA	NA	NA	NA	NA	NA	NA	NA	NA	NA	NA	NA	NA
uniform	2n = 6x*	5	4	PD	NA	NA	NA	NA	NA	NA	NA	NA	NA	NA	NA	NA	NA	NA	NA	NA	NA	NA	NA	NA	NA	NA
uniform	2n = 6x*	5	4	FA	NA	NA	NA	NA	NA	NA	NA	NA	NA	NA	NA	NA	NA	NA	NA	NA	NA	NA	NA	NA	NA	NA
uniform	2n = 8x*	5	4	MM	0.261668	0.358169	0.240689	0.212711	0.0467225	0.0451937	0.107119	0.11	0.05	0.19	0.15	0.08	0.16	0.147	0.0834762	0.0679852	0.043046	0.0421463	0.0314908	0.0545897	0.0183604	0.0658845
uniform	2n = 8x*	5	4	ML	0.125848	0.114904	0.0219039	0.0272094	0.109827	0.23491	0.259441	0	0.2	0.1	0.5	0.2	0	0.48	0.0966747	0.148017	0.0705386	0.113926	0.0187682	0.121932	0.0205685	0.205315
uniform	2n = 8x*	5	4	RI	0.214113	0.206013	0.203287	0.0796446	0.0566139	0.0863102	0.0749038	0	0	0.2	0.1	0.1	0	0.082	0.078947	0.182282	0.0386244	0.10588	0.00385901	0.0732966	0.0359672	0.174761
uniform	2n = 8x*	5	4	LO	0.196126	0.28114	0.146313	0.0625946	0.0446788	0.141637	0.0683952	0.1	0.2	0.1	0.1	0.2	0.1	0.14	0.0732848	0.235652	0.0424993	0.172595	0.00125951	0.0835948	0.0852719	0.257288
uniform	2n = 8x*	5	4	WE	0.142042	0.335028	0.147616	0.0773949	0.0678291	0.0959028	0.0367091	0.1	0	0	0	0	0	0.138	0.0655938	0.201712	0.038078	0.143726	-0.00318888	0.0792155	0.0583754	0.22699
uniform	2n = 8x*	5	4	VR	NA	NA	NA	NA	NA	NA	NA	NA	NA	NA	NA	NA	NA	NA	NA	NA	NA	NA	NA	NA	NA	NA
uniform	2n = 8x*	5	4	PD	NA	NA	NA	NA	NA	NA	NA	NA	NA	NA	NA	NA	NA	NA	NA	NA	NA	NA	NA	NA	NA	NA
uniform	2n = 8x*	5	4	FA	NA	NA	NA	NA	NA	NA	NA	NA	NA	NA	NA	NA	NA	NA	NA	NA	NA	NA	NA	NA	NA	NA
uniform	2n = 2x	10	4	MM	0.00302278	0.0235976	0.0101063	0.0172583	0.000357198	0.0210401	0.0908712	0.38	0.15	0.26	0.22	0.16	0.2	0.1764	0.506535	0.590426	0.367185	0.516353	0.353487	0.380726	0.492576	0.539359
uniform	2n = 2x	10	4	ML	0.0381117	0.00478183	0.0311361	0.00689577	0.054817	0.0574869	0.17465	0.75	0.2	0.24	0.24	0.18	0.35	0.54	0.540665	0.671325	0.501413	0.62416	0.486077	0.516439	0.602301	0.645084
uniform	2n = 2x	10	4	RI	0.00261939	0.0369199	0.00323108	0.0944631	0.0306404	0.0230972	0.0855505	0.2	0.3	0	0.3	0.1	0.1	0.188	0.53473	0.659492	0.392988	0.555547	0.349565	0.434726	0.487651	0.616764
uniform	2n = 2x	10	4	LO	0.027268	0.0156092	0.0031399	0.084159	0.0135789	0.0319724	0.0937065	0.2	0.1	0.2	0.3	0.1	0.4	0.196	0.528088	0.661061	0.374611	0.573192	0.331855	0.415831	0.504155	0.634949
uniform	2n = 2x	10	4	WE	0.0328387	0.041034	0.0191661	0.0884705	0.0344405	0.0515748	0.0645295	0.3	0.1	0.2	0.5	0	0.3	0.246	0.533431	0.666532	0.400576	0.565534	0.358037	0.441455	0.497033	0.627029
uniform	2n = 2x	10	4	VR	NA	NA	NA	NA	NA	NA	NA	NA	NA	NA	NA	NA	NA	NA	NA	NA	NA	NA	NA	NA	NA	NA
uniform	2n = 2x	10	4	PD	NA	NA	NA	NA	NA	NA	NA	NA	NA	NA	NA	NA	NA	NA	NA	NA	NA	NA	NA	NA	NA	NA
uniform	2n = 2x	10	4	FA	NA	NA	NA	NA	NA	NA	NA	NA	NA	NA	NA	NA	NA	NA	NA	NA	NA	NA	NA	NA	NA	NA
uniform	2n = 4x	10	4	MM	0.152215	0.21243	0.0112209	0.034384	0.0408903	0.00801158	0.0981262	0.09	0.06	0.13	0.14	0.17	0.16	0.1404	0.23317	0.28898	0.149798	0.230172	0.135738	0.163797	0.201272	0.258671
uniform	2n = 4x	10	4	ML	0.122679	0.179351	0.0539416	0.0321384	0.0380937	0.0834725	0.198323	0.17	0.14	0.14	0.18	0.14	0.32	0.5108	0.2283	0.308716	0.206699	0.290878	0.187227	0.226008	0.257427	0.323633
uniform	2n = 4x	10	4	RI	0.0996624	0.062732	0.0112896	0.21523	0.13229	0.137	0.0967937	0.1	0.1	0	0.1	0	0	0.092	0.0341393	0.11005	0.0146488	0.0569977	-0.0158893	0.0451596	-0.00587355	0.11942
uniform	2n = 4x	10	4	LO	0.0773055	0.199169	0.0421774	0.0512217	0.164064	0.0905988	0.0874346	0.2	0.2	0.2	0.3	0.1	0.2	0.154	0.146267	0.302833	0.0919866	0.245615	0.0474533	0.136155	0.151377	0.335428
uniform	2n = 4x	10	4	WE	0.109829	0.235487	0.0217233	0.00583265	0.138187	0.0518559	0.0723517	0.2	0.2	0.1	0.2	0.3	0.1	0.146	0.181869	0.300344	0.122178	0.234393	0.0749787	0.16883	0.143172	0.321665
uniform	2n = 4x	10	4	VR	NA	NA	NA	NA	NA	NA	NA	NA	NA	NA	NA	NA	NA	NA	NA	NA	NA	NA	NA	NA	NA	NA
uniform	2n = 4x	10	4	PD	NA	NA	NA	NA	NA	NA	NA	NA	NA	NA	NA	NA	NA	NA	NA	NA	NA	NA	NA	NA	NA	NA
uniform	2n = 4x	10	4	FA	NA	NA	NA	NA	NA	NA	NA	NA	NA	NA	NA	NA	NA	NA	NA	NA	NA	NA	NA	NA	NA	NA
uniform	2n = 6x	10	4	MM	0.203258	0.227199	0.0765934	0.0636654	0.0655609	0.0594776	0.0957124	0.17	0.13	0.16	0.16	0.14	0.12	0.1154	0.194584	0.241262	0.113179	0.175764	0.100322	0.125998	0.148711	0.202555
uniform	2n = 6x	10	4	ML	0.165524	0.179942	0.00882031	0.0176837	0.0486675	0.0733703	0.209651	0.22	0.19	0.06	0.13	0.15	0.16	0.4784	0.214284	0.255456	0.194212	0.244473	0.174609	0.213661	0.209612	0.278713
uniform	2n = 6x	10	4	RI	0.137032	0.275376	0.150624	0.231679	0.129672	0.148339	0.0913887	0.1	0	0	0.2	0.1	0.1	0.132	0.252097	0.273896	0.148067	0.200067	0.107352	0.188287	0.114156	0.283008
uniform	2n = 6x	10	4	LO	0.157866	0.275567	0.11106	0.216281	0.0988753	0.202845	0.0881324	0.2	0.1	0.1	0.1	0.2	0.2	0.12	0.252568	0.277532	0.151359	0.21143	0.109822	0.192368	0.121739	0.297696
uniform	2n = 6x	10	4	WE	0.149971	0.293594	0.115044	0.226209	0.0943119	0.216106	0.080616	0.2	0.1	0.1	0.1	0.1	0.1	0.13	0.266427	0.281109	0.166374	0.206702	0.123548	0.208582	0.119914	0.290355
uniform	2n = 6x	10	4	VR	NA	NA	NA	NA	NA	NA	NA	NA	NA	NA	NA	NA	NA	NA	NA	NA	NA	NA	NA	NA	NA	NA
uniform	2n = 6x	10	4	PD	NA	NA	NA	NA	NA	NA	NA	NA	NA	NA	NA	NA	NA	NA	NA	NA	NA	NA	NA	NA	NA	NA
uniform	2n = 6x	10	4	FA	NA	NA	NA	NA	NA	NA	NA	NA	NA	NA	NA	NA	NA	NA	NA	NA	NA	NA	NA	NA	NA	NA
uniform	2n = 8x	10	4	MM	0.331399	0.343243	0.100881	0.132518	0.0615811	0.0587223	0.121108	0.11	0.1	0.17	0.1	0.11	0.16	0.1088	0.0814904	0.121543	0.0447878	0.0847854	0.032469	0.057093	0.0581944	0.111256
uniform	2n = 8x	10	4	ML	0.128386	0.206903	0.116514	0.0150354	0.163676	0.000930059	0.242898	0.1	0	0.1	0	0.3	0.1	0.462	0.118255	0.0696337	0.0904555	0.0590627	0.036315	0.144067	-0.0443357	0.161209
uniform	2n = 8x	10	4	RI	0.227354	0.334965	0.163519	0.197679	0.224917	0.253226	0.107114	0	0.1	0.1	0.1	0.2	0.2	0.12	0.148934	0.0351634	0.0828622	0.0255757	0.0435745	0.121894	-0.0630757	0.113827
uniform	2n = 8x	10	4	LO	0.252053	0.33865	0.153806	0.226295	0.220818	0.214085	0.0935251	0	0.1	0.1	0.2	0.4	0.1	0.17	0.117947	0.105502	0.0738228	0.0865127	0.0294144	0.11794	-0.0134063	0.184721
uniform	2n = 8x	10	4	WE	0.265288	0.373711	0.164737	0.222267	0.202887	0.214753	0.0858519	0	0.1	0	0.2	0.3	0	0.174	0.111117	0.0991332	0.0641242	0.0826482	0.023138	0.104895	-0.0188313	0.182442
uniform	2n = 8x	10	4	VR	NA	NA	NA	NA	NA	NA	NA	NA	NA	NA	NA	NA	NA	NA	NA	NA	NA	NA	NA	NA	NA	NA
uniform	2n = 8x	10	4	PD	NA	NA	NA	NA	NA	NA	NA	NA	NA	NA	NA	NA	NA	NA	NA	NA	NA	NA	NA	NA	NA	NA
uniform	2n = 8x	10	4	FA	NA	NA	NA	NA	NA	NA	NA	NA	NA	NA	NA	NA	NA	NA	NA	NA	NA	NA	NA	NA	NA	NA
uniform	2n = 4x*	10	4	MM	0.176434	0.188803	0.0161725	0.0944363	0.0258692	0.00612062	0.103428	0.09	0.09	0.18	0.16	0.15	0.16	0.1372	0.239849	0.255246	0.153564	0.208356	0.139529	0.167538	0.178353	0.237972
uniform	2n = 4x*	10	4	ML	0.129008	0.163002	0.0390672	0.036463	0.0445056	0.0836228	0.203476	0.17	0.22	0.22	0.24	0.15	0.29	0.4976	0.247793	0.281258	0.230518	0.267855	0.210705	0.250142	0.233567	0.301478
uniform	2n = 4x*	10	4	RI	0.232378	0.195263	0.0213108	0.0652809	0.130801	0.0303594	0.136361	0.1	0.1	0.2	0.1	0.1	0.2	0.098	0.186991	0.18041	0.0796575	0.101442	0.0496396	0.109532	0.033925	0.168037
uniform	2n = 4x*	10	4	LO	0.156752	0.180899	0.00297835	0.0666222	0.030668	0.0493473	0.090564	0	0.2	0.2	0	0.1	0.2	0.16	0.333941	0.302743	0.215549	0.246814	0.171161	0.259064	0.151597	0.337493
uniform	2n = 4x*	10	4	WE	0.149758	0.192806	0.00259504	0.0673034	0.0198415	0.0308452	0.0678066	0.3	0.1	0.2	0.1	0.1	0.2	0.16	0.351798	0.294454	0.256798	0.237135	0.20826	0.304075	0.142822	0.327179
uniform	2n = 4x*	10	4	VR	NA	NA	NA	NA	NA	NA	NA	NA	NA	NA	NA	NA	NA	NA	NA	NA	NA	NA	NA	NA	NA	NA
uniform	2n = 4x*	10	4	PD	NA	NA	NA	NA	NA	NA	NA	NA	NA	NA	NA	NA	NA	NA	NA	NA	NA	NA	NA	NA	NA	NA
uniform	2n = 4x*	10	4	FA	NA	NA	NA	NA	NA	NA	NA	NA	NA	NA	NA	NA	NA	NA	NA	NA	NA	NA	NA	NA	NA	NA
uniform	2n = 6x*	10	4	MM	0.170726	0.235343	0.0213777	0.0995996	0.0291109	0.0139543	0.099718	0.17	0.15	0.18	0.13	0.11	0.12	0.1106	0.185758	0.171084	0.111152	0.125643	0.0978963	0.124369	0.0978566	0.153234
uniform	2n = 6x*	10	4	ML	0.146635	0.199901	0.0302025	0.0324066	0.0447529	0.108312	0.211211	0.18	0.2	0.1	0.08	0.19	0.2	0.4816	0.216109	0.19491	0.200184	0.187741	0.180179	0.220024	0.151785	0.2232
uniform	2n = 6x*	10	4	RI	0.165399	0.353666	0.0321582	0.000258498	0.103991	0.104522	0.0890351	0.1	0	0	0.2	0	0.2	0.096	0.1539	-0.02187	0.0887983	-0.0153468	0.0480185	0.129283	-0.100627	0.0701576
uniform	2n = 6x*	10	4	LO	0.241838	0.311109	0.0529026	0.0321973	0.0941907	0.0712056	0.0845443	0	0	0.1	0.1	0.1	0.2	0.144	0.144002	-0.00893456	0.0859979	-0.00658949	0.0437451	0.127944	-0.0962842	0.0832114
uniform	2n = 6x*	10	4	WE	0.260404	0.341058	0.0156454	0.0765857	0.110258	0.0293167	0.0712753	0	0	0.1	0	0	0.3	0.122	0.174321	-0.0140761	0.110283	-0.0102187	0.06585	0.15428	-0.0984801	0.0782023
uniform	2n = 6x*	10	4	VR	NA	NA	NA	NA	NA	NA	NA	NA	NA	NA	NA	NA	NA	NA	NA	NA	NA	NA	NA	NA	NA	NA
uniform	2n = 6x*	10	4	PD	NA	NA	NA	NA	NA	NA	NA	NA	NA	NA	NA	NA	NA	NA	NA	NA	NA	NA	NA	NA	NA	NA
uniform	2n = 6x*	10	4	FA	NA	NA	NA	NA	NA	NA	NA	NA	NA	NA	NA	NA	NA	NA	NA	NA	NA	NA	NA	NA	NA	NA
uniform	2n = 8x*	10	4	MM	0.32767	0.312254	0.117426	0.139121	0.081454	0.00765091	0.121769	0.05	0.12	0.12	0.12	0.09	0.11	0.1026	0.0878693	0.108901	0.0493767	0.0742591	0.0367883	0.0619494	0.0482084	0.100209
uniform	2n = 8x*	10	4	ML	0.250158	0.31309	0.0287171	0.085418	0.00855479	0.149642	0.238736	0.3	0	0.2	0	0.1	0.1	0.482	0.117311	0.198965	0.0995488	0.167778	0.0395455	0.158837	0.0665528	0.265585
uniform	2n = 8x*	10	4	RI	0.410306	0.409891	0.0808031	0.263251	0.0897654	0.0521418	0.0712224	0	0	0.2	0	0.1	0.2	0.1	0.0910183	0.210151	0.0491345	0.14357	0.0108012	0.0873236	0.0617871	0.223438
uniform	2n = 8x*	10	4	LO	0.366291	0.354409	0.053125	0.251351	0.0175833	0.0659017	0.0667425	0	0.1	0.1	0.1	0	0.3	0.15	0.0901708	0.237895	0.0533272	0.181388	0.0112994	0.0951669	0.0905825	0.269203
uniform	2n = 8x*	10	4	WE	0.344878	0.397057	0.0902381	0.259892	0.0133947	0.0916678	0.0645071	0	0	0.2	0	0	0.4	0.13	0.0896431	0.210611	0.0541723	0.153775	0.0112729	0.0968726	0.0660965	0.239097
uniform	2n = 8x*	10	4	VR	NA	NA	NA	NA	NA	NA	NA	NA	NA	NA	NA	NA	NA	NA	NA	NA	NA	NA	NA	NA	NA	NA
uniform	2n = 8x*	10	4	PD	NA	NA	NA	NA	NA	NA	NA	NA	NA	NA	NA	NA	NA	NA	NA	NA	NA	NA	NA	NA	NA	NA
uniform	2n = 8x*	10	4	FA	NA	NA	NA	NA	NA	NA	NA	NA	NA	NA	NA	NA	NA	NA	NA	NA	NA	NA	NA	NA	NA	NA
uniform	2n = 2x	15	4	MM	0.016845	0.0180479	0.00967497	0.0147027	0.0128238	0.0158176	0.091023	0.38	0.25	0.22	0.26	0.26	0.27	0.222	0.576463	0.664541	0.446691	0.609002	0.433071	0.460106	0.587584	0.629568
uniform	2n = 2x	15	4	ML	0.0232219	0.00631775	0.0133929	0.014579	0.0445793	0.0362974	0.157507	0.81	0.25	0.2	0.32	0.25	0.39	0.5716	0.630423	0.731874	0.599636	0.699221	0.586074	0.612863	0.680269	0.717239
uniform	2n = 2x	15	4	RI	0.0226676	0.0436866	0.0212522	0.0469915	0.0743617	0.0530095	0.082372	0.1	0.3	0.4	0.2	0.2	0	0.226	0.626712	0.691157	0.501343	0.627275	0.459579	0.540895	0.558873	0.687198
uniform	2n = 2x	15	4	LO	0.0596814	0.019449	0.0222497	0.0423413	0.0608071	0.0334437	0.0980352	0.1	0.1	0.4	0	0.2	0	0.246	0.607869	0.709949	0.466984	0.656159	0.424703	0.507233	0.590362	0.713292
uniform	2n = 2x	15	4	WE	0.0556851	0.0607667	0.0253706	0.051962	0.0381292	0.00514144	0.0537639	0.2	0.1	0.3	0.1	0.3	0.1	0.212	0.643118	0.695911	0.527482	0.624239	0.488106	0.564715	0.55614	0.684011
uniform	2n = 2x	15	4	VR	NA	NA	NA	NA	NA	NA	NA	NA	NA	NA	NA	NA	NA	NA	NA	NA	NA	NA	NA	NA	NA	NA
uniform	2n = 2x	15	4	PD	NA	NA	NA	NA	NA	NA	NA	NA	NA	NA	NA	NA	NA	NA	NA	NA	NA	NA	NA	NA	NA	NA
uniform	2n = 2x	15	4	FA	NA	NA	NA	NA	NA	NA	NA	NA	NA	NA	NA	NA	NA	NA	NA	NA	NA	NA	NA	NA	NA	NA
uniform	2n = 4x	15	4	MM	0.14962	0.194708	0.013552	0.035248	0.0545088	0.00156077	0.100818	0.14	0.12	0.11	0.16	0.19	0.18	0.1516	0.286426	0.301515	0.189306	0.256219	0.175001	0.203531	0.225713	0.286224
uniform	2n = 4x	15	4	ML	0.111257	0.167903	0.014167	0.00780311	0.00995352	0.0584265	0.186335	0.21	0.15	0.18	0.22	0.16	0.33	0.5324	0.283319	0.317838	0.264206	0.306302	0.244692	0.283507	0.272393	0.33945
uniform	2n = 4x	15	4	RI	0.0833808	0.110939	0.0411415	0.0479366	0.195707	0.043425	0.120981	0	0	0	0.5	0.3	0.4	0.104	0.106973	0.138525	0.0448594	0.0849742	0.015102	0.0745374	0.0107724	0.158245
uniform	2n = 4x	15	4	LO	0.183315	0.137551	0.0169541	0.123495	0.0614318	0.0551361	0.101228	0	0	0.2	0	0	0.1	0.164	0.281393	0.187568	0.187594	0.156777	0.14154	0.232837	0.0563647	0.25405
uniform	2n = 4x	15	4	WE	0.202662	0.151681	0.00484592	0.157321	0.0686167	0.0768002	0.0943586	0	0	0.2	0	0	0	0.18	0.309474	0.181173	0.220067	0.148306	0.171949	0.267138	0.0497019	0.244046
uniform	2n = 4x	15	4	VR	NA	NA	NA	NA	NA	NA	NA	NA	NA	NA	NA	NA	NA	NA	NA	NA	NA	NA	NA	NA	NA	NA
uniform	2n = 4x	15	4	PD	NA	NA	NA	NA	NA	NA	NA	NA	NA	NA	NA	NA	NA	NA	NA	NA	NA	NA	NA	NA	NA	NA
uniform	2n = 4x	15	4	FA	NA	NA	NA	NA	NA	NA	NA	NA	NA	NA	NA	NA	NA	NA	NA	NA	NA	NA	NA	NA	NA	NA
uniform	2n = 6x	15	4	MM	0.205839	0.248723	0.0405524	0.0889132	0.0228067	0.0278519	0.0952385	0.12	0.13	0.16	0.17	0.12	0.14	0.1328	0.199327	0.262427	0.121514	0.202545	0.108038	0.134945	0.174164	0.23059
uniform	2n = 6x	15	4	ML	0.187482	0.197457	0.0090834	0.049208	0.0515605	0.070637	0.196829	0.15	0.19	0.12	0.17	0.2	0.16	0.4936	0.217027	0.275653	0.202843	0.266548	0.18267	0.222846	0.231708	0.300704
uniform	2n = 6x	15	4	RI	0.0319119	0.400363	0.0421622	0.173313	0.101793	0.0557457	0.0873358	0.2	0	0.1	0.1	0.1	0.2	0.114	0.243094	0.24825	0.154638	0.193935	0.110465	0.198202	0.101546	0.283006
uniform	2n = 6x	15	4	LO	0.0980532	0.340152	0.0277199	0.142791	0.0476685	0.0953876	0.0922446	0.2	0.1	0.1	0.2	0.2	0.1	0.124	0.252855	0.224102	0.16131	0.186193	0.117019	0.204961	0.0870592	0.281676
uniform	2n = 6x	15	4	WE	0.108805	0.346854	0.0450509	0.160533	0.0381249	0.111921	0.0796065	0.4	0.1	0.1	0.1	0.2	0.1	0.132	0.276426	0.225084	0.185227	0.179453	0.139387	0.230275	0.0840075	0.271635
uniform	2n = 6x	15	4	VR	NA	NA	NA	NA	NA	NA	NA	NA	NA	NA	NA	NA	NA	NA	NA	NA	NA	NA	NA	NA	NA	NA
uniform	2n = 6x	15	4	PD	NA	NA	NA	NA	NA	NA	NA	NA	NA	NA	NA	NA	NA	NA	NA	NA	NA	NA	NA	NA	NA	NA
uniform	2n = 6x	15	4	FA	NA	NA	NA	NA	NA	NA	NA	NA	NA	NA	NA	NA	NA	NA	NA	NA	NA	NA	NA	NA	NA	NA
uniform	2n = 8x	15	4	MM	0.313772	0.339183	0.15902	0.159078	0.0264146	0.0399984	0.12034	0.12	0.12	0.1	0.12	0.1	0.11	0.1033	0.0851761	0.123723	0.0494278	0.087783	0.0364238	0.062415	0.0607367	0.114701
uniform	2n = 8x	15	4	ML	0.17706	0.161537	0.036014	0.0617249	0.209795	0.031106	0.231714	0.1	0.1	0.1	0	0.2	0.2	0.47	0.121226	0.0806686	0.101662	0.0724955	0.0423962	0.160215	-0.0370255	0.180296
uniform	2n = 8x	15	4	RI	0.287569	0.25353	0.166852	0.211733	0.207685	0.143231	0.0930147	0	0	0.1	0.2	0.1	0.1	0.116	0.0770813	0.136179	0.043292	0.0972947	0.00335425	0.0830918	0.010588	0.182549
uniform	2n = 8x	15	4	LO	0.318184	0.291678	0.179252	0.24579	0.179294	0.170675	0.0858139	0.1	0.2	0	0.2	0.1	0	0.164	0.105494	0.113643	0.0648113	0.0899474	0.0211541	0.108222	-0.00634197	0.184584
uniform	2n = 8x	15	4	WE	0.312502	0.309779	0.158084	0.237383	0.153886	0.193357	0.0802819	0	0.1	0	0.2	0	0.1	0.13	0.107912	0.111575	0.0630454	0.0834289	0.0215238	0.10435	-0.00760523	0.173092
uniform	2n = 8x	15	4	VR	NA	NA	NA	NA	NA	NA	NA	NA	NA	NA	NA	NA	NA	NA	NA	NA	NA	NA	NA	NA	NA	NA
uniform	2n = 8x	15	4	PD	NA	NA	NA	NA	NA	NA	NA	NA	NA	NA	NA	NA	NA	NA	NA	NA	NA	NA	NA	NA	NA	NA
uniform	2n = 8x	15	4	FA	NA	NA	NA	NA	NA	NA	NA	NA	NA	NA	NA	NA	NA	NA	NA	NA	NA	NA	NA	NA	NA	NA
uniform	2n = 4x*	15	4	MM	0.165263	0.23192	0.00641182	0.0562493	0.0413729	0.0205566	0.102727	0.15	0.11	0.11	0.12	0.2	0.2	0.1532	0.259044	0.33761	0.170341	0.283164	0.155968	0.184641	0.253469	0.312325
uniform	2n = 4x*	15	4	ML	0.133072	0.186217	0.0320756	0.0228162	0.0163165	0.0783269	0.188646	0.19	0.07	0.13	0.14	0.19	0.27	0.5254	0.265377	0.356109	0.249884	0.349318	0.229991	0.269569	0.315815	0.381951
uniform	2n = 4x*	15	4	RI	0.025219	0.0413476	0.0439671	0.13792	0.181703	0.0301082	0.126433	0.2	0.1	0	0.1	0.2	0.2	0.09	0.124478	0.0627319	0.0515435	0.0413121	0.0221269	0.080871	-0.0389431	0.121038
uniform	2n = 4x*	15	4	LO	0.0989879	0.169352	0.0468364	0.0707204	0.0551799	0.0562723	0.0896458	0.1	0.1	0.3	0	0.1	0.3	0.154	0.290883	0.302885	0.189941	0.256993	0.144569	0.234515	0.15855	0.350378
uniform	2n = 4x*	15	4	WE	0.113308	0.183117	0.0525198	0.056124	0.041654	0.0424701	0.0751377	0.2	0.1	0.2	0.1	0.1	0	0.184	0.319033	0.312717	0.232724	0.258042	0.18338	0.280899	0.162325	0.348948
uniform	2n = 4x*	15	4	VR	NA	NA	NA	NA	NA	NA	NA	NA	NA	NA	NA	NA	NA	NA	NA	NA	NA	NA	NA	NA	NA	NA
uniform	2n = 4x*	15	4	PD	NA	NA	NA	NA	NA	NA	NA	NA	NA	NA	NA	NA	NA	NA	NA	NA	NA	NA	NA	NA	NA	NA
uniform	2n = 4x*	15	4	FA	NA	NA	NA	NA	NA	NA	NA	NA	NA	NA	NA	NA	NA	NA	NA	NA	NA	NA	NA	NA	NA	NA
uniform	2n = 6x*	15	4	MM	0.178649	0.234714	0.00675271	0.0787864	0.0591482	0.0233673	0.0961511	0.19	0.14	0.22	0.13	0.16	0.12	0.1218	0.182486	0.222883	0.110638	0.174589	0.0971747	0.124061	0.145362	0.203511
uniform	2n = 6x*	15	4	ML	0.146243	0.189604	0.0347597	0.0276865	0.0381971	0.0855848	0.199275	0.3	0.16	0.16	0.14	0.12	0.16	0.4842	0.208172	0.250017	0.197276	0.245999	0.176748	0.217633	0.210142	0.281194
uniform	2n = 6x*	15	4	RI	0.236628	0.254799	0.0357502	0.0315941	0.0605537	0.0479301	0.0818456	0.2	0	0	0.1	0.1	0.1	0.14	0.190422	0.112547	0.119362	0.0894888	0.0753002	0.162959	-0.00719047	0.184511
uniform	2n = 6x*	15	4	LO	0.243757	0.264773	0.0636583	0.0122568	0.0729265	0.0307641	0.0823122	0.1	0	0.2	0.2	0.1	0.1	0.188	0.173541	0.144516	0.110667	0.11616	0.065649	0.155236	0.0187903	0.211348
uniform	2n = 6x*	15	4	WE	0.264711	0.273194	0.0365233	0.0512283	0.0875846	0.06344	0.0574029	0.1	0	0.2	0.2	0.1	0.2	0.184	0.203453	0.144694	0.137909	0.116153	0.0904551	0.184739	0.0189032	0.211225
uniform	2n = 6x*	15	4	VR	NA	NA	NA	NA	NA	NA	NA	NA	NA	NA	NA	NA	NA	NA	NA	NA	NA	NA	NA	NA	NA	NA
uniform	2n = 6x*	15	4	PD	NA	NA	NA	NA	NA	NA	NA	NA	NA	NA	NA	NA	NA	NA	NA	NA	NA	NA	NA	NA	NA	NA
uniform	2n = 6x*	15	4	FA	NA	NA	NA	NA	NA	NA	NA	NA	NA	NA	NA	NA	NA	NA	NA	NA	NA	NA	NA	NA	NA	NA
uniform	2n = 8x*	15	4	MM	0.330995	0.344974	0.160808	0.144901	0.0673216	0.0447905	0.123881	0.1	0.06	0.14	0.14	0.06	0.13	0.1021	0.121698	0.137528	0.0723757	0.0981428	0.0591003	0.0856254	0.071002	0.125138
uniform	2n = 8x*	15	4	ML	0.289715	0.251105	0.0432948	0.138629	0.0485088	0.148863	0.227926	0.1	0.1	0	0.2	0	0.1	0.488	0.154123	0.166581	0.127762	0.15239	0.0694973	0.185158	0.0420283	0.259079
uniform	2n = 8x*	15	4	RI	0.364461	0.328975	0.141417	0.222235	0.093042	0.019318	0.0755042	0	0	0.1	0.1	0	0	0.116	0.132237	0.235264	0.0761959	0.163	0.0353946	0.116744	0.0805789	0.243207
uniform	2n = 8x*	15	4	LO	0.285369	0.265682	0.135233	0.213078	0.0326787	0.0122572	0.0676713	0	0.1	0	0.1	0.1	0.1	0.164	0.139215	0.210155	0.0873174	0.158632	0.0428584	0.131431	0.0681206	0.246553
uniform	2n = 8x*	15	4	WE	0.278601	0.272409	0.141875	0.247527	0.0241129	0.0449087	0.0369689	0	0.2	0.1	0.1	0.2	0	0.118	0.138099	0.179765	0.0888145	0.130784	0.0432871	0.133974	0.0429184	0.216641
uniform	2n = 8x*	15	4	VR	NA	NA	NA	NA	NA	NA	NA	NA	NA	NA	NA	NA	NA	NA	NA	NA	NA	NA	NA	NA	NA	NA
uniform	2n = 8x*	15	4	PD	NA	NA	NA	NA	NA	NA	NA	NA	NA	NA	NA	NA	NA	NA	NA	NA	NA	NA	NA	NA	NA	NA
uniform	2n = 8x*	15	4	FA	NA	NA	NA	NA	NA	NA	NA	NA	NA	NA	NA	NA	NA	NA	NA	NA	NA	NA	NA	NA	NA	NA
uniform	2n = 2x	20	4	MM	0.00888507	0.0131091	0.00318604	0.0129012	0.00802043	0.0119969	0.0910458	0.5	0.31	0.29	0.22	0.3	0.23	0.2626	0.646321	0.725148	0.522897	0.686734	0.509953	0.535603	0.667971	0.704625
uniform	2n = 2x	20	4	ML	0.0245338	0.0176541	0.0167718	0.00789976	0.0262838	0.0258944	0.149245	0.77	0.33	0.27	0.34	0.3	0.44	0.588	0.698262	0.787304	0.668067	0.766497	0.656157	0.679644	0.750853	0.781282
uniform	2n = 2x	20	4	RI	0.00667737	0.036942	0.0402822	0.0244716	0.0392279	0.0572393	0.0893049	0.2	0.4	0.2	0.1	0.5	0.4	0.248	0.675048	0.78752	0.565631	0.726696	0.52544	0.603303	0.673018	0.772758
uniform	2n = 2x	20	4	LO	0.0258131	0.00299624	0.00106029	0.00122499	0.0594654	0.0866703	0.0966789	0.5	0.3	0.4	0.3	0.3	0.1	0.288	0.649239	0.790126	0.507851	0.739693	0.465892	0.547531	0.687421	0.784342
uniform	2n = 2x	20	4	WE	0.0237292	0.0519683	0.0507637	0.0418508	0.0119119	0.0455832	0.0665395	0.2	0.3	0.1	0.3	0.5	0.3	0.278	0.679123	0.788528	0.593425	0.714612	0.55509	0.629245	0.660266	0.761513
uniform	2n = 2x	20	4	VR	NA	NA	NA	NA	NA	NA	NA	NA	NA	NA	NA	NA	NA	NA	NA	NA	NA	NA	NA	NA	NA	NA
uniform	2n = 2x	20	4	PD	NA	NA	NA	NA	NA	NA	NA	NA	NA	NA	NA	NA	NA	NA	NA	NA	NA	NA	NA	NA	NA	NA
uniform	2n = 2x	20	4	FA	NA	NA	NA	NA	NA	NA	NA	NA	NA	NA	NA	NA	NA	NA	NA	NA	NA	NA	NA	NA	NA	NA
uniform	2n = 4x	20	4	MM	0.125911	0.172531	0.0104043	0.0271593	0.0363234	0.0100087	0.100044	0.09	0.08	0.13	0.15	0.27	0.11	0.1694	0.290541	0.345127	0.201853	0.302044	0.186867	0.216746	0.271404	0.332072
uniform	2n = 4x	20	4	ML	0.0966589	0.165189	0.0292691	0.0117231	0.0141262	0.0637272	0.180202	0.15	0.12	0.22	0.15	0.21	0.31	0.5584	0.278478	0.34256	0.260783	0.335414	0.241124	0.280228	0.301629	0.368359
uniform	2n = 4x	20	4	RI	0.0529057	0.152518	0.000996995	0.0554385	0.0590386	0.0617737	0.127363	0	0	0.2	0.2	0.1	0.1	0.104	0.184984	0.217378	0.0918065	0.143436	0.0567394	0.126647	0.0646516	0.220444
uniform	2n = 4x	20	4	LO	0.133035	0.105381	0.0165207	0.0665107	0.00338108	0.00511477	0.0966189	0	0.1	0.1	0.2	0.2	0.2	0.17	0.288054	0.329818	0.189447	0.274115	0.143804	0.234286	0.17801	0.365041
uniform	2n = 4x	20	4	WE	0.160828	0.125365	0.0309041	0.103814	0.028546	0.0295601	0.0841948	0.1	0.1	0.1	0.2	0.2	0.2	0.164	0.314354	0.329705	0.2287	0.268922	0.179392	0.276861	0.174353	0.358575
uniform	2n = 4x	20	4	VR	NA	NA	NA	NA	NA	NA	NA	NA	NA	NA	NA	NA	NA	NA	NA	NA	NA	NA	NA	NA	NA	NA
uniform	2n = 4x	20	4	PD	NA	NA	NA	NA	NA	NA	NA	NA	NA	NA	NA	NA	NA	NA	NA	NA	NA	NA	NA	NA	NA	NA
uniform	2n = 4x	20	4	FA	NA	NA	NA	NA	NA	NA	NA	NA	NA	NA	NA	NA	NA	NA	NA	NA	NA	NA	NA	NA	NA	NA
uniform	2n = 6x	20	4	MM	0.198488	0.241385	0.0223322	0.0802331	0.0321678	0.00313078	0.0977809	0.21	0.15	0.18	0.2	0.19	0.19	0.1274	0.213568	0.250578	0.134251	0.202225	0.120387	0.148062	0.172448	0.231632
uniform	2n = 6x	20	4	ML	0.174727	0.208392	0.00757595	0.0526016	0.0384747	0.0713894	0.190675	0.2	0.17	0.17	0.18	0.13	0.23	0.5052	0.236796	0.281724	0.224682	0.276967	0.204379	0.244791	0.241727	0.311477
uniform	2n = 6x	20	4	RI	0.150158	0.389776	0.0555406	0.299652	0.00822274	0.120483	0.0837555	0.2	0.1	0.2	0.1	0.3	0.1	0.134	0.238534	0.189142	0.152177	0.153183	0.107643	0.196101	0.0558497	0.247632
uniform	2n = 6x	20	4	LO	0.172458	0.39578	0.0380933	0.284888	0.0420322	0.120654	0.0911692	0.1	0.1	0.3	0.2	0.3	0.1	0.14	0.241264	0.170439	0.155595	0.141971	0.11054	0.200012	0.0414543	0.239642
uniform	2n = 6x	20	4	WE	0.199382	0.41327	0.0585788	0.307911	0.064764	0.139484	0.0712535	0.3	0	0.4	0.1	0.1	0.2	0.144	0.27378	0.175098	0.192327	0.143206	0.144122	0.239622	0.0444899	0.239152
uniform	2n = 6x	20	4	VR	NA	NA	NA	NA	NA	NA	NA	NA	NA	NA	NA	NA	NA	NA	NA	NA	NA	NA	NA	NA	NA	NA
uniform	2n = 6x	20	4	PD	NA	NA	NA	NA	NA	NA	NA	NA	NA	NA	NA	NA	NA	NA	NA	NA	NA	NA	NA	NA	NA	NA
uniform	2n = 6x	20	4	FA	NA	NA	NA	NA	NA	NA	NA	NA	NA	NA	NA	NA	NA	NA	NA	NA	NA	NA	NA	NA	NA	NA
uniform	2n = 8x	20	4	MM	0.309886	0.360048	0.118708	0.127559	0.0227471	0.0282095	0.118725	0.08	0.04	0.16	0.1	0.14	0.1	0.105	0.0917519	0.135876	0.0554241	0.100203	0.0418949	0.0689329	0.0721499	0.128097
uniform	2n = 8x	20	4	ML	0.1842	0.145132	0.00455841	0.0785975	0.211683	0.0319189	0.221783	0.2	0.2	0.2	0.1	0	0.1	0.498	0.0850889	0.199967	0.0725486	0.170378	0.0120244	0.132543	0.0679222	0.269278
uniform	2n = 8x	20	4	RI	0.259307	0.216884	0.0947585	0.226541	0.197319	0.174947	0.0875456	0	0	0	0	0.1	0.2	0.136	0.0581701	0.201975	0.03403	0.15609	-0.00759583	0.075538	0.0632734	0.246229
uniform	2n = 8x	20	4	LO	0.282109	0.222507	0.130603	0.255221	0.227824	0.142612	0.0941556	0.1	0.1	0.1	0.1	0.2	0.3	0.188	0.085341	0.221299	0.0526898	0.184454	0.00876814	0.0964086	0.0844611	0.280769
uniform	2n = 8x	20	4	WE	0.308887	0.261735	0.164313	0.278863	0.194303	0.172998	0.096512	0.1	0.1	0.1	0.1	0.1	0.1	0.194	0.082043	0.217468	0.0520278	0.179768	0.00693364	0.0969108	0.0805964	0.275416
uniform	2n = 8x	20	4	VR	NA	NA	NA	NA	NA	NA	NA	NA	NA	NA	NA	NA	NA	NA	NA	NA	NA	NA	NA	NA	NA	NA
uniform	2n = 8x	20	4	PD	NA	NA	NA	NA	NA	NA	NA	NA	NA	NA	NA	NA	NA	NA	NA	NA	NA	NA	NA	NA	NA	NA
uniform	2n = 8x	20	4	FA	NA	NA	NA	NA	NA	NA	NA	NA	NA	NA	NA	NA	NA	NA	NA	NA	NA	NA	NA	NA	NA	NA
uniform	2n = 4x*	20	4	MM	0.169344	0.192821	0.00206208	0.0577008	0.0280724	0.0211483	0.0995993	0.11	0.09	0.24	0.14	0.12	0.18	0.1628	0.298635	0.361263	0.206268	0.3119	0.19135	0.221091	0.2818	0.341386
uniform	2n = 4x*	20	4	ML	0.135562	0.170154	0.041392	0.0214453	0.0176811	0.0479658	0.181941	0.17	0.11	0.37	0.23	0.1	0.31	0.555	0.296455	0.373215	0.280435	0.370607	0.260756	0.29988	0.337231	0.403052
uniform	2n = 4x*	20	4	RI	0.137341	0.24383	0.0192181	0.0951698	0.0594685	0.0611464	0.132292	0.1	0	0.2	0.1	0	0	0.124	0.147158	0.159619	0.0715677	0.0930298	0.0370754	0.10589	0.022781	0.162364
uniform	2n = 4x*	20	4	LO	0.143472	0.112482	0.0402627	0.0133332	0.0373227	0.0297551	0.0973743	0	0.2	0.3	0	0.1	0.2	0.186	0.314011	0.355354	0.213796	0.305387	0.166883	0.259744	0.20743	0.39728
uniform	2n = 4x*	20	4	WE	0.169101	0.139929	0.0149796	0.0295171	0.00217713	0.0554556	0.0806503	0	0.1	0.3	0	0	0.1	0.162	0.337762	0.371105	0.260444	0.306945	0.208972	0.310477	0.212455	0.395747
uniform	2n = 4x*	20	4	VR	NA	NA	NA	NA	NA	NA	NA	NA	NA	NA	NA	NA	NA	NA	NA	NA	NA	NA	NA	NA	NA	NA
uniform	2n = 4x*	20	4	PD	NA	NA	NA	NA	NA	NA	NA	NA	NA	NA	NA	NA	NA	NA	NA	NA	NA	NA	NA	NA	NA	NA
uniform	2n = 4x*	20	4	FA	NA	NA	NA	NA	NA	NA	NA	NA	NA	NA	NA	NA	NA	NA	NA	NA	NA	NA	NA	NA	NA	NA
uniform	2n = 6x*	20	4	MM	0.181188	0.233372	0.0188512	0.108695	0.0186083	0.00182458	0.101162	0.24	0.09	0.12	0.15	0.16	0.17	0.1358	0.198504	0.236071	0.125014	0.195491	0.111063	0.138916	0.164797	0.225806
uniform	2n = 6x*	20	4	ML	0.161585	0.199021	0.0231388	0.0661166	0.0446518	0.068904	0.192112	0.27	0.12	0.16	0.12	0.17	0.29	0.4942	0.221008	0.260257	0.210245	0.258717	0.189733	0.230573	0.222714	0.294015
uniform	2n = 6x*	20	4	RI	0.175588	0.261868	0.036118	0.0849928	0.0644536	0.0977256	0.0952228	0.4	0.2	0	0	0.1	0.4	0.16	0.224306	0.124473	0.142452	0.0989541	0.098018	0.186319	0.00240317	0.193677
uniform	2n = 6x*	20	4	LO	0.165095	0.270616	0.0608533	0.0627575	0.1094	0.0750125	0.0861535	0.1	0.1	0.1	0	0	0.5	0.18	0.217714	0.159414	0.13814	0.13091	0.0936977	0.182034	0.0316186	0.227643
uniform	2n = 6x*	20	4	WE	0.180193	0.287362	0.0346032	0.0944429	0.125667	0.107867	0.0689706	0	0.1	0.2	0.2	0	0.4	0.194	0.242289	0.168639	0.164384	0.135962	0.117456	0.21058	0.0385318	0.230832
uniform	2n = 6x*	20	4	VR	NA	NA	NA	NA	NA	NA	NA	NA	NA	NA	NA	NA	NA	NA	NA	NA	NA	NA	NA	NA	NA	NA
uniform	2n = 6x*	20	4	PD	NA	NA	NA	NA	NA	NA	NA	NA	NA	NA	NA	NA	NA	NA	NA	NA	NA	NA	NA	NA	NA	NA
uniform	2n = 6x*	20	4	FA	NA	NA	NA	NA	NA	NA	NA	NA	NA	NA	NA	NA	NA	NA	NA	NA	NA	NA	NA	NA	NA	NA
uniform	2n = 8x*	20	4	MM	0.316099	0.332375	0.119829	0.121959	0.102656	0.0175069	0.129651	0.09	0.11	0.11	0.05	0.04	0.08	0.1021	0.117728	0.144011	0.0731358	0.11005	0.0592648	0.0869786	0.0810235	0.13889
uniform	2n = 8x*	20	4	ML	0.308463	0.292215	0.0739308	0.0842214	0.0219898	0.13162	0.219584	0.1	0.3	0	0.3	0	0.2	0.498	0.0953878	0.106009	0.0786462	0.100745	0.0201753	0.136581	-0.0148403	0.213674
uniform	2n = 8x*	20	4	RI	0.355189	0.390404	0.0904224	0.128561	0.121096	0.00991409	0.0784484	0	0	0.1	0	0	0.2	0.118	0.0900769	0.137124	0.0487075	0.0920961	0.010293	0.0869785	0.0105024	0.172472
uniform	2n = 8x*	20	4	LO	0.343953	0.374245	0.167498	0.161891	0.102755	0.00862031	0.0797697	0	0.1	0	0.1	0.1	0.3	0.174	0.11644	0.170057	0.0714565	0.123876	0.0278874	0.114755	0.0355635	0.210268
uniform	2n = 8x*	20	4	WE	0.370256	0.379297	0.181862	0.189291	0.120191	0.0271524	0.0775885	0	0.1	0.1	0.2	0.1	0.4	0.156	0.112776	0.155189	0.069019	0.114335	0.0255834	0.112195	0.0249336	0.201922
uniform	2n = 8x*	20	4	VR	NA	NA	NA	NA	NA	NA	NA	NA	NA	NA	NA	NA	NA	NA	NA	NA	NA	NA	NA	NA	NA	NA
uniform	2n = 8x*	20	4	PD	NA	NA	NA	NA	NA	NA	NA	NA	NA	NA	NA	NA	NA	NA	NA	NA	NA	NA	NA	NA	NA	NA
uniform	2n = 8x*	20	4	FA	NA	NA	NA	NA	NA	NA	NA	NA	NA	NA	NA	NA	NA	NA	NA	NA	NA	NA	NA	NA	NA	NA
uniform	2n = 2x	50	4	MM	0.00492128	0.0193366	0.00170395	0.00119424	0.000913289	0.0183241	0.0908236	0.71	0.47	0.39	0.5	0.34	0.44	0.391	0.77626	0.84817	0.636201	0.831646	0.625306	0.646848	0.819988	0.842614
uniform	2n = 2x	50	4	ML	0.0131899	0.00919085	0.00617134	0.00818548	0.0115281	0.00844683	0.129047	0.91	0.53	0.4	0.51	0.33	0.57	0.6642	0.812318	0.896773	0.747085	0.893956	0.73783	0.756059	0.886057	0.901336
uniform	2n = 2x	50	4	RI	0.032507	0.0359725	0.0121384	0.0160207	0.0344085	0.0022211	0.087169	0.7	0.7	0.2	0.4	0.6	0.7	0.392	0.801037	0.85671	0.701911	0.841004	0.670085	0.73116	0.803227	0.872044
uniform	2n = 2x	50	4	LO	0.0071616	0.0167027	0.0185347	0.00979151	0.0326012	0.00191273	0.0970644	0.6	0.6	0.4	0.5	0.6	0.7	0.392	0.784641	0.85828	0.644638	0.850524	0.609932	0.676875	0.814234	0.880192
uniform	2n = 2x	50	4	WE	0.0434172	0.0525698	0.0159782	0.0297306	0.00702236	0.0448029	0.0703605	0.2	0.6	0.5	0.4	0.8	0.4	0.338	0.789116	0.856377	0.729564	0.833105	0.70061	0.756119	0.794138	0.865251
uniform	2n = 2x	50	4	VR	NA	NA	NA	NA	NA	NA	NA	NA	NA	NA	NA	NA	NA	NA	NA	NA	NA	NA	NA	NA	NA	NA
uniform	2n = 2x	50	4	PD	NA	NA	NA	NA	NA	NA	NA	NA	NA	NA	NA	NA	NA	NA	NA	NA	NA	NA	NA	NA	NA	NA
uniform	2n = 2x	50	4	FA	NA	NA	NA	NA	NA	NA	NA	NA	NA	NA	NA	NA	NA	NA	NA	NA	NA	NA	NA	NA	NA	NA
uniform	2n = 4x	50	4	MM	0.125454	0.195791	0.0116357	0.0340889	0.0345763	0.0126563	0.0969708	0.05	0.09	0.22	0.08	0.29	0.21	0.1852	0.346447	0.411562	0.24582	0.374768	0.230736	0.260786	0.344419	0.404335
uniform	2n = 4x	50	4	ML	0.11265	0.180445	0.0355314	0.0187576	0.0168068	0.0311799	0.164272	0.03	0.06	0.32	0.14	0.27	0.39	0.6298	0.313754	0.399535	0.290521	0.398128	0.271347	0.309464	0.365423	0.429851
uniform	2n = 4x	50	4	RI	0.224337	0.0541134	0.0559041	0.0368716	0.0414528	0.00531186	0.101173	0.2	0.1	0.1	0.2	0.4	0	0.178	0.159442	0.261488	0.0815907	0.21325	0.0452664	0.117699	0.116814	0.305702
uniform	2n = 4x	50	4	LO	0.119822	0.130679	0.0335266	0.0671639	0.0199674	0.0192983	0.0936824	0.2	0.2	0.3	0.2	0.3	0.3	0.208	0.338995	0.38019	0.229178	0.330607	0.18268	0.274653	0.232778	0.421812
uniform	2n = 4x	50	4	WE	0.13496	0.143122	0.022088	0.0889248	0.0085216	0.00122942	0.0783625	0.1	0.3	0.3	0.1	0.2	0.1	0.134	0.382661	0.378908	0.292095	0.322442	0.241608	0.341005	0.226196	0.412452
uniform	2n = 4x	50	4	VR	NA	NA	NA	NA	NA	NA	NA	NA	NA	NA	NA	NA	NA	NA	NA	NA	NA	NA	NA	NA	NA	NA
uniform	2n = 4x	50	4	PD	NA	NA	NA	NA	NA	NA	NA	NA	NA	NA	NA	NA	NA	NA	NA	NA	NA	NA	NA	NA	NA	NA
uniform	2n = 4x	50	4	FA	NA	NA	NA	NA	NA	NA	NA	NA	NA	NA	NA	NA	NA	NA	NA	NA	NA	NA	NA	NA	NA	NA
uniform	2n = 6x	50	4	MM	0.200928	0.238395	0.0194475	0.0967803	0.0191875	0.0240977	0.0964823	0.16	0.06	0.22	0.21	0.12	0.16	0.163	0.245652	0.289802	0.160911	0.242096	0.146541	0.175213	0.211768	0.271959
uniform	2n = 6x	50	4	ML	0.186091	0.214398	0.00126046	0.0594674	0.0281052	0.0459127	0.177504	0.22	0.11	0.11	0.19	0.18	0.31	0.5232	0.270776	0.323998	0.257798	0.323342	0.23771	0.277665	0.28857	0.357262
uniform	2n = 6x	50	4	RI	0.174343	0.348235	0.00776716	0.280306	0.0484548	0.0725433	0.0908548	0	0.1	0.2	0.1	0	0.3	0.144	0.268106	0.257331	0.173689	0.212869	0.128831	0.217838	0.115008	0.306638
uniform	2n = 6x	50	4	LO	0.156899	0.320089	0.01001	0.227357	0.0134282	0.057565	0.0922171	0	0.1	0.3	0	0.1	0.3	0.176	0.281611	0.237451	0.184197	0.200774	0.138925	0.2287	0.100024	0.297448
uniform	2n = 6x	50	4	WE	0.169737	0.332526	0.0170905	0.24676	0.022743	0.0734444	0.0774666	0.1	0.1	0.3	0	0.1	0.4	0.164	0.310916	0.244022	0.220352	0.196866	0.172332	0.267328	0.100511	0.289563
uniform	2n = 6x	50	4	VR	NA	NA	NA	NA	NA	NA	NA	NA	NA	NA	NA	NA	NA	NA	NA	NA	NA	NA	NA	NA	NA	NA
uniform	2n = 6x	50	4	PD	NA	NA	NA	NA	NA	NA	NA	NA	NA	NA	NA	NA	NA	NA	NA	NA	NA	NA	NA	NA	NA	NA
uniform	2n = 6x	50	4	FA	NA	NA	NA	NA	NA	NA	NA	NA	NA	NA	NA	NA	NA	NA	NA	NA	NA	NA	NA	NA	NA	NA
uniform	2n = 8x	50	4	MM	0.318056	0.33135	0.144638	0.140327	0.0264784	0.0612986	0.117971	0.1	0.09	0.16	0.15	0.18	0.12	0.126	0.111625	0.173883	0.0734326	0.140995	0.0587288	0.0881046	0.110418	0.171306
uniform	2n = 8x	50	4	ML	0.241258	0.135408	0.0930599	0.00874177	0.241045	0.0160576	0.216827	0.3	0.2	0	0.1	0	0.2	0.474	0.117488	0.142078	0.105201	0.129867	0.0419069	0.167654	0.0190716	0.237511
uniform	2n = 8x	50	4	RI	0.350528	0.228506	0.207404	0.179388	0.228492	0.193005	0.103298	0.1	0.1	0.2	0.1	0.2	0.1	0.124	0.0843879	0.151189	0.0503452	0.122191	0.00792679	0.0925828	0.0242241	0.217834
uniform	2n = 8x	50	4	LO	0.357787	0.23265	0.164671	0.221931	0.224157	0.162617	0.0962625	0	0	0.1	0	0.1	0.2	0.2	0.0982899	0.167873	0.0611838	0.140842	0.0169156	0.105213	0.0392185	0.239582
uniform	2n = 8x	50	4	WE	0.359174	0.228617	0.164812	0.232778	0.228883	0.167353	0.0786293	0	0	0.2	0	0.2	0.1	0.15	0.110079	0.181751	0.0708563	0.151745	0.0251328	0.116284	0.0508681	0.249557
uniform	2n = 8x	50	4	VR	NA	NA	NA	NA	NA	NA	NA	NA	NA	NA	NA	NA	NA	NA	NA	NA	NA	NA	NA	NA	NA	NA
uniform	2n = 8x	50	4	PD	NA	NA	NA	NA	NA	NA	NA	NA	NA	NA	NA	NA	NA	NA	NA	NA	NA	NA	NA	NA	NA	NA
uniform	2n = 8x	50	4	FA	NA	NA	NA	NA	NA	NA	NA	NA	NA	NA	NA	NA	NA	NA	NA	NA	NA	NA	NA	NA	NA	NA
uniform	2n = 4x*	50	4	MM	0.15108	0.215753	0.0145572	0.0658412	0.0409086	0.0185409	0.101389	0.04	0.06	0.24	0.06	0.22	0.23	0.2078	0.345511	0.411862	0.243791	0.365799	0.228726	0.258738	0.335855	0.395005
uniform	2n = 4x*	50	4	ML	0.143579	0.19277	0.032637	0.0478043	0.00972965	0.0215719	0.166518	0.05	0.07	0.2	0.09	0.28	0.37	0.6228	0.310336	0.411602	0.286428	0.410423	0.267226	0.305403	0.378041	0.441802
uniform	2n = 4x*	50	4	RI	0.126917	0.175718	0.00732447	0.0371461	0.0444393	0.0586523	0.1325	0.3	0.2	0	0	0.2	0.2	0.15	0.240973	0.21312	0.126577	0.176413	0.0894273	0.163376	0.0774594	0.271925
uniform	2n = 4x*	50	4	LO	0.156695	0.208465	0.0295973	0.0158776	0.0255361	0.0265402	0.100152	0	0	0.2	0	0.1	0.3	0.172	0.379618	0.364077	0.254921	0.326234	0.209144	0.299584	0.225119	0.420397
uniform	2n = 4x*	50	4	WE	0.173398	0.225123	0.0165668	0.0313518	0.0434618	0.0432371	0.0774178	0	0.1	0.2	0	0.1	0.2	0.152	0.419671	0.383269	0.330466	0.327418	0.279787	0.379309	0.230834	0.417612
uniform	2n = 4x*	50	4	VR	NA	NA	NA	NA	NA	NA	NA	NA	NA	NA	NA	NA	NA	NA	NA	NA	NA	NA	NA	NA	NA	NA
uniform	2n = 4x*	50	4	PD	NA	NA	NA	NA	NA	NA	NA	NA	NA	NA	NA	NA	NA	NA	NA	NA	NA	NA	NA	NA	NA	NA
uniform	2n = 4x*	50	4	FA	NA	NA	NA	NA	NA	NA	NA	NA	NA	NA	NA	NA	NA	NA	NA	NA	NA	NA	NA	NA	NA	NA
uniform	2n = 6x*	50	4	MM	0.174278	0.232624	0.00955539	0.0859575	0.040548	0.00122909	0.0972464	0.2	0.1	0.2	0.24	0.17	0.19	0.1582	0.232014	0.26121	0.151682	0.222506	0.13727	0.166029	0.19121	0.253351
uniform	2n = 6x*	50	4	ML	0.15458	0.214348	0.019918	0.0551083	0.0213021	0.0648941	0.177887	0.26	0.11	0.15	0.19	0.14	0.26	0.5208	0.251457	0.294744	0.237766	0.294739	0.217587	0.257742	0.259243	0.329441
uniform	2n = 6x*	50	4	RI	0.197238	0.268723	0.128908	0.030346	0.0526201	0.00210093	0.0827853	0.3	0.1	0.3	0.1	0.2	0.3	0.164	0.219324	0.14762	0.146282	0.124744	0.0995223	0.192398	0.0223801	0.22452
uniform	2n = 6x*	50	4	LO	0.234116	0.270972	0.127275	0.0327641	0.0334522	0.0183294	0.0818983	0.1	0	0.3	0.2	0.1	0.2	0.212	0.203227	0.163019	0.132735	0.136288	0.0867868	0.17812	0.0352657	0.234553
uniform	2n = 6x*	50	4	WE	0.250024	0.285092	0.0963608	0.0640975	0.0462661	0.0465688	0.0684188	0	0	0.2	0.2	0.1	0.2	0.214	0.225736	0.165262	0.159698	0.134988	0.110468	0.208146	0.0362159	0.231149
uniform	2n = 6x*	50	4	VR	NA	NA	NA	NA	NA	NA	NA	NA	NA	NA	NA	NA	NA	NA	NA	NA	NA	NA	NA	NA	NA	NA
uniform	2n = 6x*	50	4	PD	NA	NA	NA	NA	NA	NA	NA	NA	NA	NA	NA	NA	NA	NA	NA	NA	NA	NA	NA	NA	NA	NA
uniform	2n = 6x*	50	4	FA	NA	NA	NA	NA	NA	NA	NA	NA	NA	NA	NA	NA	NA	NA	NA	NA	NA	NA	NA	NA	NA	NA
uniform	2n = 8x*	50	4	MM	0.309377	0.323111	0.136655	0.126353	0.0872947	0.0123712	0.126158	0.15	0.1	0.16	0.12	0.16	0.14	0.127	0.143278	0.174143	0.0942708	0.143941	0.079623	0.108878	0.11279	0.17481
uniform	2n = 8x*	50	4	ML	0.336996	0.26881	0.0700806	0.0493311	0.0147594	0.126261	0.210315	0.1	0.1	0	0	0.1	0	0.496	0.143132	0.232551	0.127637	0.219509	0.0648847	0.189384	0.107678	0.325855
uniform	2n = 8x*	50	4	RI	0.44656	0.324044	0.139056	0.182922	0.0714078	0.0224627	0.0815173	0.1	0	0	0.2	0	0.2	0.13	0.124957	0.248557	0.0739148	0.185661	0.0319983	0.115572	0.0967403	0.271642
uniform	2n = 8x*	50	4	LO	0.376473	0.322414	0.150205	0.195193	0.0496816	0.0125465	0.0735603	0.1	0	0.1	0.2	0	0.3	0.178	0.124595	0.250707	0.0779903	0.200789	0.0335909	0.122083	0.105329	0.292582
uniform	2n = 8x*	50	4	WE	0.38519	0.360224	0.180945	0.223676	0.0816532	0.0642834	0.072541	0.1	0	0.1	0.1	0	0.3	0.19	0.145002	0.218975	0.0938312	0.178411	0.0480547	0.139214	0.080815	0.272618
uniform	2n = 8x*	50	4	VR	NA	NA	NA	NA	NA	NA	NA	NA	NA	NA	NA	NA	NA	NA	NA	NA	NA	NA	NA	NA	NA	NA
uniform	2n = 8x*	50	4	PD	NA	NA	NA	NA	NA	NA	NA	NA	NA	NA	NA	NA	NA	NA	NA	NA	NA	NA	NA	NA	NA	NA
uniform	2n = 8x*	50	4	FA	NA	NA	NA	NA	NA	NA	NA	NA	NA	NA	NA	NA	NA	NA	NA	NA	NA	NA	NA	NA	NA	NA
uniform	2n = 2x	100	4	MM	0.00199834	0.00997801	0.0151859	0.00419496	0.0067521	0.00162723	0.091461	0.84	0.65	0.62	0.62	0.57	0.57	0.5288	0.8715	0.909746	0.7186	0.89996	0.709862	0.727116	0.892641	0.906804
uniform	2n = 2x	100	4	ML	0.0105996	0.00287087	0.00687216	0.000911055	0.000867779	0.00767546	0.119477	0.95	0.67	0.7	0.68	0.61	0.64	0.737	0.881056	0.939499	0.778499	0.938813	0.770762	0.786006	0.934112	0.943188
uniform	2n = 2x	100	4	RI	0.0296643	0.00628807	0.0162162	0.00924106	0.0179095	0.0226716	0.0867615	0.7	0.5	0.8	0.7	0.5	0.4	0.536	0.886504	0.899903	0.759563	0.887491	0.733673	0.78325	0.859127	0.91042
uniform	2n = 2x	100	4	LO	0.00227844	0.00817689	0.0193669	0.00338256	0.0372528	0.0201073	0.098042	0.8	0.9	0.7	0.6	0.6	0.6	0.586	0.877238	0.907352	0.686913	0.899517	0.65759	0.714158	0.874098	0.920023
uniform	2n = 2x	100	4	WE	0.0346812	0.0267493	0.0154243	0.029271	0.00428256	0.0131138	0.0644069	0.6	0.6	0.7	0.5	0.4	0.3	0.478	0.887764	0.909185	0.856375	0.876128	0.838518	0.872394	0.846556	0.900308
uniform	2n = 2x	100	4	VR	NA	NA	NA	NA	NA	NA	NA	NA	NA	NA	NA	NA	NA	NA	NA	NA	NA	NA	NA	NA	NA	NA
uniform	2n = 2x	100	4	PD	NA	NA	NA	NA	NA	NA	NA	NA	NA	NA	NA	NA	NA	NA	NA	NA	NA	NA	NA	NA	NA	NA
uniform	2n = 2x	100	4	FA	NA	NA	NA	NA	NA	NA	NA	NA	NA	NA	NA	NA	NA	NA	NA	NA	NA	NA	NA	NA	NA	NA
uniform	2n = 4x	100	4	MM	0.134063	0.194076	0.00365743	0.0343001	0.0317429	0.000663375	0.0983594	0.02	0.11	0.12	0.05	0.3	0.25	0.191	0.377106	0.427885	0.274967	0.393796	0.259675	0.290122	0.363541	0.423222
uniform	2n = 4x	100	4	ML	0.123971	0.182556	0.0181117	0.0211043	0.0255623	0.02685	0.159653	0	0.12	0.27	0.07	0.27	0.39	0.6656	0.315462	0.407664	0.288736	0.406121	0.269731	0.307516	0.373652	0.437597
uniform	2n = 4x	100	4	RI	0.109559	0.161323	0.060493	0.0646805	0.010295	0.0193798	0.104983	0	0.2	0	0	0	0.1	0.172	0.231799	0.257924	0.12785	0.226706	0.0889323	0.166378	0.12309	0.325432
uniform	2n = 4x	100	4	LO	0.111881	0.111472	0.00141563	0.0773027	0.00101634	0.0390884	0.0922176	0	0	0.2	0	0.2	0.3	0.132	0.409214	0.405771	0.286681	0.362008	0.23977	0.332257	0.263679	0.45289
uniform	2n = 4x	100	4	WE	0.1283	0.127382	0.0122096	0.1035	0.0111339	0.017159	0.0790788	0	0.2	0	0	0.1	0.2	0.082	0.450928	0.407478	0.360119	0.352078	0.309812	0.408416	0.256098	0.441184
uniform	2n = 4x	100	4	VR	NA	NA	NA	NA	NA	NA	NA	NA	NA	NA	NA	NA	NA	NA	NA	NA	NA	NA	NA	NA	NA	NA
uniform	2n = 4x	100	4	PD	NA	NA	NA	NA	NA	NA	NA	NA	NA	NA	NA	NA	NA	NA	NA	NA	NA	NA	NA	NA	NA	NA
uniform	2n = 4x	100	4	FA	NA	NA	NA	NA	NA	NA	NA	NA	NA	NA	NA	NA	NA	NA	NA	NA	NA	NA	NA	NA	NA	NA
uniform	2n = 6x	100	4	MM	0.188709	0.239215	0.0206569	0.0869553	0.0239474	0.018241	0.096945	0.23	0.04	0.16	0.2	0.13	0.24	0.1774	0.250476	0.312356	0.16725	0.263516	0.152618	0.181809	0.233184	0.293335
uniform	2n = 6x	100	4	ML	0.174265	0.226742	0.00858694	0.0624084	0.0188095	0.0394504	0.173239	0.24	0.07	0.12	0.2	0.16	0.36	0.5428	0.273109	0.344574	0.258896	0.344402	0.238889	0.278684	0.31009	0.377817
uniform	2n = 6x	100	4	RI	0.132801	0.324686	0.0317938	0.237286	0.0274436	0.0641948	0.09578	0.2	0.2	0.2	0	0	0	0.19	0.307872	0.247673	0.206586	0.205535	0.160474	0.251798	0.106993	0.300079
uniform	2n = 6x	100	4	LO	0.129207	0.296852	0.025381	0.218674	0.0245198	0.0617453	0.0944015	0	0.2	0.3	0	0	0.1	0.234	0.300705	0.273196	0.199613	0.232605	0.153748	0.24462	0.132301	0.328193
uniform	2n = 6x	100	4	WE	0.143555	0.303012	0.0314801	0.242282	0.0291675	0.0756535	0.0787745	0.2	0.2	0.3	0	0	0.2	0.212	0.331543	0.278375	0.239638	0.230927	0.19084	0.287254	0.13308	0.324316
uniform	2n = 6x	100	4	VR	NA	NA	NA	NA	NA	NA	NA	NA	NA	NA	NA	NA	NA	NA	NA	NA	NA	NA	NA	NA	NA	NA
uniform	2n = 6x	100	4	PD	NA	NA	NA	NA	NA	NA	NA	NA	NA	NA	NA	NA	NA	NA	NA	NA	NA	NA	NA	NA	NA	NA
uniform	2n = 6x	100	4	FA	NA	NA	NA	NA	NA	NA	NA	NA	NA	NA	NA	NA	NA	NA	NA	NA	NA	NA	NA	NA	NA	NA
uniform	2n = 8x	100	4	MM	0.301	0.321595	0.143211	0.134895	0.0212495	0.0563571	0.11874	0.11	0.06	0.1	0.09	0.2	0.12	0.1534	0.125074	0.176945	0.0852413	0.146374	0.0700341	0.100409	0.115205	0.177255
uniform	2n = 8x	100	4	ML	0.248018	0.157949	0.0811423	0.107202	0.18706	0.0176845	0.2131	0.1	0	0	0.1	0.1	0.3	0.484	0.143756	0.173618	0.13227	0.165548	0.0675501	0.195882	0.0506911	0.276082
uniform	2n = 8x	100	4	RI	0.329706	0.269706	0.153635	0.28837	0.20389	0.196012	0.0988924	0.2	0	0.1	0.1	0.2	0.2	0.12	0.101634	0.137227	0.0634431	0.111791	0.0190957	0.107541	0.012835	0.208579
uniform	2n = 8x	100	4	LO	0.354349	0.25773	0.170782	0.273283	0.192608	0.1935	0.0909896	0.1	0	0.1	0	0.3	0.2	0.166	0.105033	0.165688	0.0670059	0.138948	0.021659	0.112078	0.0372658	0.237782
uniform	2n = 8x	100	4	WE	0.355221	0.246143	0.164232	0.276884	0.197094	0.191743	0.0745523	0.1	0	0.2	0.1	0.2	0.2	0.154	0.1083	0.169823	0.0733962	0.134944	0.0252868	0.121166	0.038495	0.228901
uniform	2n = 8x	100	4	VR	NA	NA	NA	NA	NA	NA	NA	NA	NA	NA	NA	NA	NA	NA	NA	NA	NA	NA	NA	NA	NA	NA
uniform	2n = 8x	100	4	PD	NA	NA	NA	NA	NA	NA	NA	NA	NA	NA	NA	NA	NA	NA	NA	NA	NA	NA	NA	NA	NA	NA
uniform	2n = 8x	100	4	FA	NA	NA	NA	NA	NA	NA	NA	NA	NA	NA	NA	NA	NA	NA	NA	NA	NA	NA	NA	NA	NA	NA
uniform	2n = 4x*	100	4	MM	0.155364	0.208565	0.0174491	0.0569244	0.0239272	0.0192111	0.100781	0.05	0.05	0.16	0.1	0.23	0.2	0.1926	0.370654	0.426916	0.262235	0.387105	0.247232	0.277113	0.357005	0.416402
uniform	2n = 4x*	100	4	ML	0.147654	0.199253	0.0288986	0.0430669	0.0108846	0.0200799	0.16179	0.04	0.06	0.26	0.06	0.26	0.39	0.6588	0.314459	0.410264	0.285773	0.407463	0.266836	0.304489	0.375108	0.438827
uniform	2n = 4x*	100	4	RI	0.129705	0.162713	0.045164	0.0155897	0.0257206	0.00803474	0.123875	0	0.1	0.2	0.2	0.1	0.1	0.16	0.258532	0.272155	0.139095	0.245561	0.101027	0.176757	0.140339	0.345299
uniform	2n = 4x*	100	4	LO	0.151271	0.211429	0.0277409	0.0331937	0.00507531	0.0593722	0.100067	0	0	0.1	0.2	0.2	0.1	0.166	0.396525	0.403331	0.276694	0.376225	0.229706	0.322395	0.274426	0.469685
uniform	2n = 4x*	100	4	WE	0.180028	0.229708	0.000975847	0.0506257	0.0389608	0.0819329	0.0763705	0	0.1	0.1	0.2	0	0	0.098	0.429024	0.40966	0.34843	0.365595	0.296953	0.397888	0.267264	0.456392
uniform	2n = 4x*	100	4	VR	NA	NA	NA	NA	NA	NA	NA	NA	NA	NA	NA	NA	NA	NA	NA	NA	NA	NA	NA	NA	NA	NA
uniform	2n = 4x*	100	4	PD	NA	NA	NA	NA	NA	NA	NA	NA	NA	NA	NA	NA	NA	NA	NA	NA	NA	NA	NA	NA	NA	NA
uniform	2n = 4x*	100	4	FA	NA	NA	NA	NA	NA	NA	NA	NA	NA	NA	NA	NA	NA	NA	NA	NA	NA	NA	NA	NA	NA	NA
uniform	2n = 6x*	100	4	MM	0.174523	0.230155	0.00159999	0.0875147	0.0362338	0.0157113	0.098533	0.23	0.04	0.17	0.26	0.2	0.19	0.179	0.240489	0.275282	0.158234	0.238005	0.143741	0.172659	0.206441	0.269075
uniform	2n = 6x*	100	4	ML	0.159218	0.217271	0.01056	0.0560833	0.0168788	0.0563117	0.173138	0.27	0.09	0.16	0.2	0.22	0.35	0.5418	0.263577	0.313485	0.246715	0.313127	0.226809	0.266414	0.278082	0.347339
uniform	2n = 6x*	100	4	RI	0.158256	0.337689	0.111793	0.0355713	0.0408696	0.00654957	0.0832661	0.2	0.1	0.4	0.1	0.4	0.1	0.2	0.222233	0.130241	0.14892	0.112463	0.101948	0.19523	0.00762183	0.214858
uniform	2n = 6x*	100	4	LO	0.174904	0.320992	0.112764	0.0365604	0.0224037	0.000150241	0.0839086	0.1	0.1	0.4	0.1	0.4	0.5	0.228	0.204252	0.145358	0.134291	0.124502	0.0880073	0.179997	0.0207437	0.225607
uniform	2n = 6x*	100	4	WE	0.193129	0.338763	0.0803623	0.0700586	0.0368499	0.0295695	0.0706105	0	0.1	0.5	0.1	0.4	0.4	0.24	0.230299	0.149194	0.166054	0.125205	0.115909	0.215354	0.023524	0.224322
uniform	2n = 6x*	100	4	VR	NA	NA	NA	NA	NA	NA	NA	NA	NA	NA	NA	NA	NA	NA	NA	NA	NA	NA	NA	NA	NA	NA
uniform	2n = 6x*	100	4	PD	NA	NA	NA	NA	NA	NA	NA	NA	NA	NA	NA	NA	NA	NA	NA	NA	NA	NA	NA	NA	NA	NA
uniform	2n = 6x*	100	4	FA	NA	NA	NA	NA	NA	NA	NA	NA	NA	NA	NA	NA	NA	NA	NA	NA	NA	NA	NA	NA	NA	NA
uniform	2n = 8x*	100	4	MM	0.304094	0.305062	0.134206	0.132368	0.0791674	0.00779522	0.127849	0.11	0.08	0.19	0.14	0.12	0.11	0.149	0.146701	0.186282	0.100035	0.157095	0.0848618	0.115162	0.125409	0.188461
uniform	2n = 8x*	100	4	ML	0.306617	0.282517	0.0394739	0.0679578	0.0348697	0.139935	0.211831	0	0.1	0.1	0.1	0	0.1	0.508	0.132286	0.243682	0.120984	0.236829	0.0565042	0.184459	0.122307	0.345127
uniform	2n = 8x*	100	4	RI	0.404214	0.338076	0.128034	0.159787	0.0562734	0.0285364	0.0852073	0	0	0	0.2	0	0.1	0.124	0.115075	0.25031	0.0693892	0.190697	0.0266168	0.111908	0.0998848	0.278359
uniform	2n = 8x*	100	4	LO	0.337872	0.332008	0.136923	0.176808	0.0444225	0.0182555	0.0765769	0	0	0	0.1	0	0.3	0.156	0.119989	0.252418	0.0763421	0.199652	0.0311924	0.121181	0.105125	0.290604
uniform	2n = 8x*	100	4	WE	0.349032	0.364912	0.174808	0.212795	0.0534522	0.0521129	0.0739111	0	0	0.1	0	0	0.3	0.148	0.137257	0.24532	0.0937729	0.19305	0.0454838	0.141625	0.0988638	0.283809
uniform	2n = 8x*	100	4	VR	NA	NA	NA	NA	NA	NA	NA	NA	NA	NA	NA	NA	NA	NA	NA	NA	NA	NA	NA	NA	NA	NA
uniform	2n = 8x*	100	4	PD	NA	NA	NA	NA	NA	NA	NA	NA	NA	NA	NA	NA	NA	NA	NA	NA	NA	NA	NA	NA	NA	NA
uniform	2n = 8x*	100	4	FA	NA	NA	NA	NA	NA	NA	NA	NA	NA	NA	NA	NA	NA	NA	NA	NA	NA	NA	NA	NA	NA	NA
uniform	2n = 2x	500	4	MM	0.00302718	0.00253437	0.00995822	0.00156207	0.00927693	0.00727464	0.0911083	1	0.97	0.94	0.97	0.88	0.98	0.808	0.951335	0.973194	0.778598	0.964526	0.77206	0.784971	0.961812	0.96705
uniform	2n = 2x	500	4	ML	0.00351489	0.000776753	0.00698596	0.000110196	0.00632115	0.00263122	0.108421	1	0.99	0.95	0.98	0.9	0.99	0.8746	0.934828	0.981973	0.795268	0.97915	0.788714	0.801642	0.977514	0.980668
uniform	2n = 2x	500	4	RI	0.0194349	0.000517886	0.0187513	0.0123729	0.012322	0.00179337	0.0861517	1	0.9	0.7	1	1	1	0.792	0.95827	0.98038	0.812827	0.972143	0.793947	0.830141	0.964831	0.977952
uniform	2n = 2x	500	4	LO	0.00508732	0.0184625	0.0067876	0.00448296	0.000583516	0.0137409	0.0968593	1	0.9	1	0.9	0.9	1	0.812	0.94788	0.981991	0.730792	0.979699	0.707024	0.752911	0.974204	0.984034
uniform	2n = 2x	500	4	WE	0.0278425	0.0147648	0.0393575	0.0312158	0.0348815	0.023326	0.0635662	1	0.9	0.5	0.7	0.8	1	0.624	0.974475	0.98344	0.949371	0.956976	0.942983	0.955059	0.946914	0.965165
uniform	2n = 2x	500	4	VR	NA	NA	NA	NA	NA	NA	NA	NA	NA	NA	NA	NA	NA	NA	NA	NA	NA	NA	NA	NA	NA	NA
uniform	2n = 2x	500	4	PD	NA	NA	NA	NA	NA	NA	NA	NA	NA	NA	NA	NA	NA	NA	NA	NA	NA	NA	NA	NA	NA	NA
uniform	2n = 2x	500	4	FA	NA	NA	NA	NA	NA	NA	NA	NA	NA	NA	NA	NA	NA	NA	NA	NA	NA	NA	NA	NA	NA	NA
uniform	2n = 4x	500	4	MM	0.128745	0.186008	0.00854609	0.0386668	0.0358963	0.000262676	0.097941	0	0.08	0.04	0	0.06	0.11	0.0894	0.385414	0.446475	0.281404	0.413825	0.266104	0.296563	0.383867	0.442912
uniform	2n = 4x	500	4	ML	0.126016	0.183635	0.0170112	0.0321886	0.0333626	0.0205907	0.157341	0	0.06	0.08	0	0.09	0.3	0.6746	0.303374	0.408902	0.274425	0.406416	0.255465	0.293173	0.374021	0.437821
uniform	2n = 4x	500	4	RI	0.107703	0.118319	0.0359391	0.0248669	0.0635488	0.0781295	0.111362	0	0.1	0.2	0.2	0.5	0.4	0.266	0.274594	0.376477	0.147418	0.351102	0.109335	0.185069	0.247547	0.446726
uniform	2n = 4x	500	4	LO	0.124367	0.135498	0.006551	0.0700602	0.0179133	0.0257857	0.0911156	0.1	0.1	0.1	0	0.1	0.2	0.05	0.382464	0.415052	0.261564	0.372342	0.215	0.306942	0.274017	0.462964
uniform	2n = 4x	500	4	WE	0.138642	0.153064	0.00290845	0.0942521	0.00332368	0.00127902	0.0796314	0	0.3	0	0	0	0.1	0.008	0.423829	0.409672	0.335386	0.359215	0.284251	0.384619	0.262204	0.449039
uniform	2n = 4x	500	4	VR	NA	NA	NA	NA	NA	NA	NA	NA	NA	NA	NA	NA	NA	NA	NA	NA	NA	NA	NA	NA	NA	NA
uniform	2n = 4x	500	4	PD	NA	NA	NA	NA	NA	NA	NA	NA	NA	NA	NA	NA	NA	NA	NA	NA	NA	NA	NA	NA	NA	NA
uniform	2n = 4x	500	4	FA	NA	NA	NA	NA	NA	NA	NA	NA	NA	NA	NA	NA	NA	NA	NA	NA	NA	NA	NA	NA	NA	NA
uniform	2n = 6x	500	4	MM	0.199131	0.24392	0.0245771	0.0927247	0.0353953	0.0210882	0.0972693	0.19	0.02	0.12	0.37	0.22	0.25	0.2486	0.258785	0.319179	0.173933	0.272732	0.159226	0.188563	0.242123	0.302799
uniform	2n = 6x	500	4	ML	0.183032	0.22991	0.0138043	0.0642833	0.00815989	0.0346114	0.166724	0.19	0.04	0.13	0.28	0.3	0.46	0.5974	0.289278	0.359718	0.27088	0.358858	0.25123	0.290307	0.324982	0.391814
uniform	2n = 6x	500	4	RI	0.144292	0.328275	0.0371266	0.214854	0.028663	0.085462	0.0893012	0.1	0.1	0.4	0.2	0.3	0.3	0.29	0.301544	0.273577	0.199688	0.233878	0.154044	0.244483	0.13326	0.329725
uniform	2n = 6x	500	4	LO	0.146342	0.327449	0.0397433	0.19866	0.0269879	0.0797323	0.0906798	0.1	0.1	0.5	0.1	0.3	0.4	0.312	0.302067	0.272974	0.199058	0.23678	0.153513	0.243759	0.13468	0.333906
uniform	2n = 6x	500	4	WE	0.157476	0.331266	0.0420786	0.216253	0.0320859	0.0912889	0.0754209	0.1	0	0.4	0.1	0.3	0.4	0.314	0.334708	0.277417	0.241293	0.232624	0.192683	0.288722	0.133655	0.326999
uniform	2n = 6x	500	4	VR	NA	NA	NA	NA	NA	NA	NA	NA	NA	NA	NA	NA	NA	NA	NA	NA	NA	NA	NA	NA	NA	NA
uniform	2n = 6x	500	4	PD	NA	NA	NA	NA	NA	NA	NA	NA	NA	NA	NA	NA	NA	NA	NA	NA	NA	NA	NA	NA	NA	NA
uniform	2n = 6x	500	4	FA	NA	NA	NA	NA	NA	NA	NA	NA	NA	NA	NA	NA	NA	NA	NA	NA	NA	NA	NA	NA	NA	NA
uniform	2n = 8x	500	4	MM	0.308979	0.329987	0.135388	0.13575	0.022265	0.0474036	0.119313	0.05	0.03	0.17	0.11	0.12	0.16	0.2002	0.128488	0.19143	0.089191	0.162464	0.0737057	0.104633	0.130618	0.193976
uniform	2n = 8x	500	4	ML	0.236405	0.157172	0.0961564	0.0760878	0.232931	0.00114985	0.210144	0.2	0.2	0	0.1	0.1	0.2	0.504	0.147857	0.218052	0.136687	0.208793	0.0717198	0.200498	0.0948112	0.317372
uniform	2n = 8x	500	4	RI	0.330366	0.269549	0.170714	0.23751	0.217406	0.209133	0.100735	0.1	0	0.2	0.3	0.2	0	0.106	0.0927898	0.16644	0.057406	0.137056	0.0134265	0.101164	0.0373804	0.234031
uniform	2n = 8x	500	4	LO	0.351144	0.287067	0.176327	0.244442	0.208352	0.174024	0.0931604	0	0	0	0	0.4	0	0.158	0.0893013	0.173461	0.0565451	0.145202	0.0115031	0.101358	0.0438068	0.243637
uniform	2n = 8x	500	4	WE	0.351467	0.298107	0.180512	0.249845	0.202961	0.184494	0.0842257	0	0	0.1	0.1	0.3	0	0.094	0.0972124	0.175074	0.0642494	0.145583	0.0172725	0.110943	0.0448745	0.243363
uniform	2n = 8x	500	4	VR	NA	NA	NA	NA	NA	NA	NA	NA	NA	NA	NA	NA	NA	NA	NA	NA	NA	NA	NA	NA	NA	NA
uniform	2n = 8x	500	4	PD	NA	NA	NA	NA	NA	NA	NA	NA	NA	NA	NA	NA	NA	NA	NA	NA	NA	NA	NA	NA	NA	NA
uniform	2n = 8x	500	4	FA	NA	NA	NA	NA	NA	NA	NA	NA	NA	NA	NA	NA	NA	NA	NA	NA	NA	NA	NA	NA	NA	NA
uniform	2n = 4x*	500	4	MM	0.159885	0.208458	0.011785	0.0620442	0.028218	0.010317	0.100624	0.01	0.08	0.05	0	0.05	0.09	0.0922	0.384713	0.459114	0.272064	0.414906	0.257106	0.286892	0.385599	0.443377
uniform	2n = 4x*	500	4	ML	0.154684	0.204708	0.0221478	0.0534273	0.0179465	0.00865623	0.15883	0.01	0.08	0.1	0	0.08	0.22	0.6702	0.299191	0.421481	0.267986	0.416216	0.249114	0.286654	0.384299	0.44714
uniform	2n = 4x*	500	4	RI	0.148242	0.181409	0.0469931	0.00432041	0.0197689	0.0053672	0.128537	0	0.1	0.2	0.1	0.5	0.4	0.264	0.311846	0.376776	0.154246	0.359846	0.119003	0.1891	0.254421	0.456819
uniform	2n = 4x*	500	4	LO	0.156053	0.198918	0.020353	0.0161258	0.000879203	0.0162806	0.0995556	0	0.1	0.2	0	0	0.4	0.084	0.410837	0.438557	0.27753	0.404158	0.23184	0.321998	0.30567	0.494088
uniform	2n = 4x*	500	4	WE	0.186572	0.220501	0.00697588	0.0394249	0.0301835	0.038365	0.0788554	0	0.1	0	0	0	0	0.008	0.449998	0.449442	0.364992	0.399461	0.313936	0.413943	0.303935	0.487034
uniform	2n = 4x*	500	4	VR	NA	NA	NA	NA	NA	NA	NA	NA	NA	NA	NA	NA	NA	NA	NA	NA	NA	NA	NA	NA	NA	NA
uniform	2n = 4x*	500	4	PD	NA	NA	NA	NA	NA	NA	NA	NA	NA	NA	NA	NA	NA	NA	NA	NA	NA	NA	NA	NA	NA	NA
uniform	2n = 4x*	500	4	FA	NA	NA	NA	NA	NA	NA	NA	NA	NA	NA	NA	NA	NA	NA	NA	NA	NA	NA	NA	NA	NA	NA
uniform	2n = 6x*	500	4	MM	0.168934	0.227958	0.00665824	0.0967707	0.0390904	0.00220217	0.0986377	0.22	0.05	0.18	0.33	0.2	0.27	0.2578	0.256229	0.288698	0.17153	0.25071	0.156834	0.18615	0.219171	0.281726
uniform	2n = 6x*	500	4	ML	0.157715	0.214557	0.00620677	0.0655146	0.0165646	0.0544787	0.166101	0.23	0.07	0.18	0.23	0.23	0.4	0.606	0.279443	0.332691	0.257034	0.331176	0.237557	0.276305	0.296678	0.364811
uniform	2n = 6x*	500	4	RI	0.184775	0.329033	0.0936913	0.0287888	0.0326764	0.0270809	0.0831584	0.1	0.1	0.2	0	0.3	0.4	0.322	0.217691	0.135605	0.144958	0.1166	0.0981812	0.191096	0.0122226	0.218464
uniform	2n = 6x*	500	4	LO	0.179292	0.314625	0.112901	0.0320341	0.0280981	0.0222264	0.0827156	0	0	0.5	0	0.3	0.5	0.376	0.215618	0.147907	0.140732	0.127491	0.0948294	0.186037	0.0230816	0.22915
uniform	2n = 6x*	500	4	WE	0.200215	0.33024	0.0830174	0.0662016	0.044578	0.0519511	0.0676432	0	0.1	0.5	0	0.4	0.5	0.35	0.242257	0.153455	0.173113	0.129586	0.12349	0.221873	0.0273009	0.229186
uniform	2n = 6x*	500	4	VR	NA	NA	NA	NA	NA	NA	NA	NA	NA	NA	NA	NA	NA	NA	NA	NA	NA	NA	NA	NA	NA	NA
uniform	2n = 6x*	500	4	PD	NA	NA	NA	NA	NA	NA	NA	NA	NA	NA	NA	NA	NA	NA	NA	NA	NA	NA	NA	NA	NA	NA
uniform	2n = 6x*	500	4	FA	NA	NA	NA	NA	NA	NA	NA	NA	NA	NA	NA	NA	NA	NA	NA	NA	NA	NA	NA	NA	NA	NA
uniform	2n = 8x*	500	4	MM	0.302169	0.306813	0.137081	0.139761	0.0771541	0.00811645	0.127142	0.07	0.04	0.13	0.11	0.12	0.13	0.1882	0.154881	0.185901	0.10774	0.159495	0.0922795	0.123148	0.12726	0.191394
uniform	2n = 8x*	500	4	ML	0.308734	0.292436	0.0653084	0.0923825	0.0191671	0.101109	0.201652	0	0	0.1	0.1	0	0.1	0.526	0.135758	0.243375	0.125056	0.237762	0.0601569	0.188903	0.122686	0.34653
uniform	2n = 8x*	500	4	RI	0.382632	0.354048	0.147699	0.193776	0.06951	0.0196472	0.0858185	0.1	0	0	0.1	0	0	0.142	0.128367	0.249266	0.0783692	0.188571	0.0350959	0.121349	0.0983746	0.275694
uniform	2n = 8x*	500	4	LO	0.347453	0.343773	0.153211	0.190929	0.0510064	0.0178789	0.0776874	0	0	0.1	0	0.1	0.1	0.17	0.129665	0.253361	0.0825773	0.201128	0.0374014	0.127416	0.106396	0.292242
uniform	2n = 8x*	500	4	WE	0.358852	0.366279	0.175172	0.205921	0.0681612	0.0386269	0.0723233	0	0	0	0	0.1	0.1	0.13	0.141406	0.243491	0.0949683	0.193341	0.0474608	0.142047	0.0984023	0.284791
uniform	2n = 8x*	500	4	VR	NA	NA	NA	NA	NA	NA	NA	NA	NA	NA	NA	NA	NA	NA	NA	NA	NA	NA	NA	NA	NA	NA
uniform	2n = 8x*	500	4	PD	NA	NA	NA	NA	NA	NA	NA	NA	NA	NA	NA	NA	NA	NA	NA	NA	NA	NA	NA	NA	NA	NA
uniform	2n = 8x*	500	4	FA	NA	NA	NA	NA	NA	NA	NA	NA	NA	NA	NA	NA	NA	NA	NA	NA	NA	NA	NA	NA	NA	NA
uniform	2n = 2x	1000	4	MM	0.00300806	0.00890058	0.0101662	0.00518764	0.00838832	0.00565997	0.0914696	1	0.99	0.96	0.98	0.99	1	0.8648	0.963338	0.981087	0.78267	0.971126	0.776429	0.788757	0.968946	0.973155
uniform	2n = 2x	1000	4	ML	0.00221607	0.00476746	0.00788836	0.00495018	0.00614956	0.0023178	0.106287	1	1	0.99	0.99	0.99	1	0.8952	0.940479	0.987501	0.789699	0.983195	0.783148	0.796076	0.981892	0.984406
uniform	2n = 2x	1000	4	RI	0.01553	0.0134784	0.0180346	0.00727411	0.0203564	0.0200178	0.0858337	0.9	1	0.9	0.9	1	1	0.85	0.972584	0.988446	0.835763	0.976999	0.819318	0.850833	0.971251	0.981608
uniform	2n = 2x	1000	4	LO	0.00764455	0.00845112	0.00225478	0.0128389	0.00425951	0.0024717	0.0967938	1	0.9	1	1	1	1	0.86	0.963376	0.990096	0.75365	0.986229	0.731872	0.773889	0.982587	0.989113
uniform	2n = 2x	1000	4	WE	0.0290003	0.0305395	0.0405292	0.0242872	0.0434932	0.0421867	0.0643376	0.9	0.9	0.7	0.9	0.6	0.7	0.706	0.98526	0.990911	0.965136	0.959024	0.96106	0.968792	0.950226	0.966293
uniform	2n = 2x	1000	4	VR	NA	NA	NA	NA	NA	NA	NA	NA	NA	NA	NA	NA	NA	NA	NA	NA	NA	NA	NA	NA	NA	NA
uniform	2n = 2x	1000	4	PD	NA	NA	NA	NA	NA	NA	NA	NA	NA	NA	NA	NA	NA	NA	NA	NA	NA	NA	NA	NA	NA	NA
uniform	2n = 2x	1000	4	FA	NA	NA	NA	NA	NA	NA	NA	NA	NA	NA	NA	NA	NA	NA	NA	NA	NA	NA	NA	NA	NA	NA
uniform	2n = 4x	1000	4	MM	0.12955	0.188786	0.00850724	0.0379219	0.0364468	0.00175947	0.0981193	0	0.06	0.01	0	0.02	0.07	0.0444	0.388475	0.449769	0.283964	0.416857	0.268665	0.29912	0.386975	0.445863
uniform	2n = 4x	1000	4	ML	0.126602	0.186454	0.0165423	0.0325197	0.034776	0.0190231	0.156958	0	0.07	0.05	0	0.05	0.3	0.6746	0.304408	0.410818	0.275162	0.408134	0.256221	0.293891	0.375801	0.439475
uniform	2n = 4x	1000	4	RI	0.109725	0.0935446	0.01421	0.03689	0.0353281	0.0562656	0.107735	0	0.1	0.3	0.1	0.1	0.2	0.248	0.261353	0.370027	0.1403	0.346903	0.102194	0.177995	0.242474	0.443385
uniform	2n = 4x	1000	4	LO	0.125345	0.127954	0.0178524	0.0692496	0.0217545	0.029598	0.090933	0	0.1	0.1	0	0.2	0	0.024	0.397293	0.418642	0.271525	0.376099	0.225193	0.316632	0.277934	0.466489
uniform	2n = 4x	1000	4	WE	0.13845	0.146122	0.00797272	0.0936629	0.00832903	0.00486493	0.0798478	0	0.3	0	0	0	0	0	0.443299	0.415251	0.351257	0.363613	0.30061	0.399929	0.267015	0.452977
uniform	2n = 4x	1000	4	VR	NA	NA	NA	NA	NA	NA	NA	NA	NA	NA	NA	NA	NA	NA	NA	NA	NA	NA	NA	NA	NA	NA
uniform	2n = 4x	1000	4	PD	NA	NA	NA	NA	NA	NA	NA	NA	NA	NA	NA	NA	NA	NA	NA	NA	NA	NA	NA	NA	NA	NA
uniform	2n = 4x	1000	4	FA	NA	NA	NA	NA	NA	NA	NA	NA	NA	NA	NA	NA	NA	NA	NA	NA	NA	NA	NA	NA	NA	NA
uniform	2n = 6x	1000	4	MM	0.197539	0.234846	0.0266548	0.0887978	0.0339041	0.0233637	0.0975951	0.17	0.01	0.09	0.34	0.22	0.28	0.2716	0.26208	0.320874	0.176051	0.274332	0.16136	0.190665	0.24372	0.304398
uniform	2n = 6x	1000	4	ML	0.180927	0.22324	0.0172279	0.0625726	0.00781277	0.0311249	0.165638	0.2	0.01	0.17	0.25	0.36	0.49	0.6138	0.287092	0.363688	0.268242	0.362433	0.248603	0.28766	0.328686	0.395255
uniform	2n = 6x	1000	4	RI	0.140447	0.316679	0.031265	0.206463	0.0449465	0.0886812	0.0883456	0.1	0.1	0.5	0.2	0.3	0.4	0.314	0.315966	0.273129	0.215137	0.232013	0.168535	0.260779	0.131905	0.327435
uniform	2n = 6x	1000	4	LO	0.142851	0.311249	0.026697	0.19537	0.0348804	0.0868177	0.091456	0.1	0.2	0.5	0	0.3	0.4	0.326	0.310439	0.281347	0.207769	0.24285	0.161726	0.252911	0.141401	0.339252
uniform	2n = 6x	1000	4	WE	0.158674	0.31944	0.0344181	0.215526	0.0437278	0.0999984	0.075404	0.3	0.2	0.5	0	0.3	0.4	0.324	0.341802	0.287425	0.250021	0.240073	0.201018	0.297777	0.141696	0.333754
uniform	2n = 6x	1000	4	VR	NA	NA	NA	NA	NA	NA	NA	NA	NA	NA	NA	NA	NA	NA	NA	NA	NA	NA	NA	NA	NA	NA
uniform	2n = 6x	1000	4	PD	NA	NA	NA	NA	NA	NA	NA	NA	NA	NA	NA	NA	NA	NA	NA	NA	NA	NA	NA	NA	NA	NA
uniform	2n = 6x	1000	4	FA	NA	NA	NA	NA	NA	NA	NA	NA	NA	NA	NA	NA	NA	NA	NA	NA	NA	NA	NA	NA	NA	NA
uniform	2n = 8x	1000	4	MM	0.313082	0.323394	0.135775	0.143547	0.0280578	0.0503406	0.118997	0.04	0.04	0.12	0.09	0.1	0.18	0.2148	0.130626	0.194349	0.0912041	0.165108	0.0756342	0.10673	0.133257	0.196618
uniform	2n = 8x	1000	4	ML	0.235591	0.156766	0.095967	0.0533397	0.22844	0.0291677	0.204559	0.2	0.2	0	0.1	0	0.3	0.51	0.161544	0.210183	0.149826	0.200819	0.084855	0.213528	0.0868258	0.309621
uniform	2n = 8x	1000	4	RI	0.344789	0.270227	0.190755	0.238004	0.21783	0.202089	0.100853	0.1	0	0.2	0.1	0.1	0	0.114	0.0986423	0.174879	0.0614606	0.144318	0.0171833	0.105497	0.0445613	0.241224
uniform	2n = 8x	1000	4	LO	0.358157	0.285644	0.189488	0.25015	0.206227	0.17794	0.09377	0	0	0.1	0.1	0.4	0.2	0.184	0.0969992	0.179019	0.0617598	0.149899	0.0164858	0.106781	0.0485547	0.248188
uniform	2n = 8x	1000	4	WE	0.364872	0.304838	0.201593	0.259643	0.191743	0.195202	0.0861163	0	0	0	0.1	0.3	0.2	0.108	0.10897	0.18139	0.0726001	0.150235	0.0252872	0.119588	0.0500151	0.24746
uniform	2n = 8x	1000	4	VR	NA	NA	NA	NA	NA	NA	NA	NA	NA	NA	NA	NA	NA	NA	NA	NA	NA	NA	NA	NA	NA	NA
uniform	2n = 8x	1000	4	PD	NA	NA	NA	NA	NA	NA	NA	NA	NA	NA	NA	NA	NA	NA	NA	NA	NA	NA	NA	NA	NA	NA
uniform	2n = 8x	1000	4	FA	NA	NA	NA	NA	NA	NA	NA	NA	NA	NA	NA	NA	NA	NA	NA	NA	NA	NA	NA	NA	NA	NA
uniform	2n = 4x*	1000	4	MM	0.160569	0.207657	0.0122086	0.0629487	0.0252827	0.016462	0.100922	0.02	0.08	0.02	0	0.02	0.01	0.054	0.389446	0.459919	0.275393	0.41779	0.260456	0.290198	0.38841	0.446321
uniform	2n = 4x*	1000	4	ML	0.15578	0.203099	0.02109	0.0571046	0.0180428	0.00616981	0.158399	0.02	0.08	0.02	0	0.03	0.19	0.6702	0.296856	0.421436	0.265487	0.415911	0.246616	0.284156	0.384002	0.446827
uniform	2n = 4x*	1000	4	RI	0.157123	0.202276	0.0465781	0.0071224	0.0103381	0.0127704	0.12763	0	0	0.3	0.1	0.4	0.3	0.256	0.3087	0.365401	0.152498	0.344164	0.11726	0.187352	0.238921	0.441415
uniform	2n = 4x*	1000	4	LO	0.155895	0.200571	0.0222809	0.0238428	0.0113863	0.0254929	0.0984662	0	0	0.2	0	0	0.1	0.048	0.411172	0.426312	0.277704	0.390963	0.231985	0.322199	0.291808	0.481804
uniform	2n = 4x*	1000	4	WE	0.17814	0.217873	0.00288692	0.0393475	0.0368791	0.0442459	0.0773486	0	0.1	0	0	0	0	0.002	0.454204	0.437828	0.36814	0.386709	0.317111	0.417043	0.290726	0.474986
uniform	2n = 4x*	1000	4	VR	NA	NA	NA	NA	NA	NA	NA	NA	NA	NA	NA	NA	NA	NA	NA	NA	NA	NA	NA	NA	NA	NA
uniform	2n = 4x*	1000	4	PD	NA	NA	NA	NA	NA	NA	NA	NA	NA	NA	NA	NA	NA	NA	NA	NA	NA	NA	NA	NA	NA	NA
uniform	2n = 4x*	1000	4	FA	NA	NA	NA	NA	NA	NA	NA	NA	NA	NA	NA	NA	NA	NA	NA	NA	NA	NA	NA	NA	NA	NA
uniform	2n = 6x*	1000	4	MM	0.169702	0.227772	0.00213355	0.0932172	0.032845	0.00109333	0.098792	0.22	0.04	0.15	0.28	0.19	0.36	0.2728	0.25248	0.288695	0.169193	0.250807	0.154467	0.183843	0.219251	0.281838
uniform	2n = 6x*	1000	4	ML	0.157325	0.21737	0.00842229	0.0681294	0.016786	0.0503888	0.164916	0.21	0.04	0.2	0.22	0.23	0.48	0.6178	0.279755	0.335077	0.255852	0.333334	0.236468	0.275033	0.298911	0.366891
uniform	2n = 6x*	1000	4	RI	0.175072	0.336705	0.0915834	0.026848	0.030248	0.0208587	0.0832641	0.1	0.1	0.5	0.1	0.3	0.4	0.354	0.234796	0.142564	0.157698	0.123717	0.110674	0.204019	0.0184714	0.226251
uniform	2n = 6x*	1000	4	LO	0.183383	0.315888	0.11232	0.0169185	0.0299225	0.000435006	0.0835401	0	0	0.5	0	0.3	0.5	0.374	0.226694	0.149012	0.149339	0.12915	0.103111	0.194924	0.0241913	0.231292
uniform	2n = 6x*	1000	4	WE	0.207664	0.335208	0.0782578	0.0548106	0.050241	0.0343647	0.0675624	0	0.1	0.6	0	0.4	0.4	0.376	0.254582	0.152277	0.184268	0.129123	0.134227	0.233372	0.0264053	0.229142
uniform	2n = 6x*	1000	4	VR	NA	NA	NA	NA	NA	NA	NA	NA	NA	NA	NA	NA	NA	NA	NA	NA	NA	NA	NA	NA	NA	NA
uniform	2n = 6x*	1000	4	PD	NA	NA	NA	NA	NA	NA	NA	NA	NA	NA	NA	NA	NA	NA	NA	NA	NA	NA	NA	NA	NA	NA
uniform	2n = 6x*	1000	4	FA	NA	NA	NA	NA	NA	NA	NA	NA	NA	NA	NA	NA	NA	NA	NA	NA	NA	NA	NA	NA	NA	NA
uniform	2n = 8x*	1000	4	MM	0.306811	0.312872	0.134162	0.133478	0.0815588	0.000863941	0.127337	0.06	0.03	0.06	0.08	0.15	0.12	0.2046	0.157003	0.189601	0.109429	0.162912	0.0939433	0.124862	0.130661	0.194819
uniform	2n = 8x*	1000	4	ML	0.28876	0.292765	0.0591295	0.104846	0.0136848	0.0902831	0.199046	0.1	0	0.1	0.3	0	0.1	0.526	0.137599	0.240151	0.127022	0.234976	0.0620085	0.190961	0.119594	0.344095
uniform	2n = 8x*	1000	4	RI	0.391578	0.346002	0.147739	0.201076	0.0775879	0.0302001	0.0858306	0.1	0	0	0.2	0	0	0.1	0.126161	0.247238	0.0768348	0.188211	0.0336594	0.119724	0.0974352	0.275881
uniform	2n = 8x*	1000	4	LO	0.343909	0.34387	0.148807	0.194811	0.0590828	0.0180241	0.0769302	0	0	0.1	0	0.1	0.2	0.138	0.130614	0.249	0.0828849	0.198553	0.0378761	0.127558	0.103315	0.290184
uniform	2n = 8x*	1000	4	WE	0.350479	0.371973	0.173814	0.208761	0.0768746	0.0431959	0.0719765	0	0	0	0	0.1	0.3	0.092	0.143199	0.241349	0.0948831	0.190139	0.0480102	0.141339	0.0958055	0.281087
uniform	2n = 8x*	1000	4	VR	NA	NA	NA	NA	NA	NA	NA	NA	NA	NA	NA	NA	NA	NA	NA	NA	NA	NA	NA	NA	NA	NA
uniform	2n = 8x*	1000	4	PD	NA	NA	NA	NA	NA	NA	NA	NA	NA	NA	NA	NA	NA	NA	NA	NA	NA	NA	NA	NA	NA	NA
uniform	2n = 8x*	1000	4	FA	NA	NA	NA	NA	NA	NA	NA	NA	NA	NA	NA	NA	NA	NA	NA	NA	NA	NA	NA	NA	NA	NA
uniform	2n = 2x	5	5	MM	0.00298096	0.0335313	0.00968867	0.00263641	0.00250403	0.0421603	0.0885548	0.47	0.18	0.15	0.12	0.14	0.14	0.1402	0.431843	0.528129	0.290525	0.41945	0.277172	0.303766	0.395481	0.442849
uniform	2n = 2x	5	5	ML	0.0397321	0.0616679	0.0479072	0.0530517	0.079177	0.058018	0.197342	0.7	0.22	0.14	0.16	0.13	0.35	0.531	0.450513	0.579614	0.37622	0.506408	0.360505	0.391722	0.481568	0.530436
uniform	2n = 2x	5	5	RI	0.0766549	0.0244735	0.0269272	0.158635	0.0599999	0.0131967	0.114714	0.3	0	0.3	0.2	0.1	0.2	0.132	0.483027	0.5276	0.341229	0.433401	0.298808	0.382304	0.353073	0.507387
uniform	2n = 2x	5	5	LO	0.0900281	0.0309851	0.0261927	0.150893	0.0743367	0.0404459	0.133537	0.3	0.2	0.3	0.2	0.2	0.2	0.15	0.491372	0.520501	0.337727	0.432457	0.296218	0.377962	0.351017	0.507403
uniform	2n = 2x	5	5	WE	0.0496828	0.00442814	0.0103808	0.10886	0.111942	0.0797389	0.0933951	0.2	0.1	0.1	0.1	0.2	0.2	0.14	0.508662	0.515821	0.337878	0.420069	0.298945	0.375688	0.339565	0.494463
uniform	2n = 2x	5	5	VR	NA	NA	NA	NA	NA	NA	NA	NA	NA	NA	NA	NA	NA	NA	NA	NA	NA	NA	NA	NA	NA	NA
uniform	2n = 2x	5	5	PD	NA	NA	NA	NA	NA	NA	NA	NA	NA	NA	NA	NA	NA	NA	NA	NA	NA	NA	NA	NA	NA	NA
uniform	2n = 2x	5	5	FA	NA	NA	NA	NA	NA	NA	NA	NA	NA	NA	NA	NA	NA	NA	NA	NA	NA	NA	NA	NA	NA	NA
uniform	2n = 4x	5	5	MM	0.116161	0.217171	0.025142	0.105241	0.0202421	0.00326745	0.0997116	0.16	0.13	0.17	0.06	0.22	0.15	0.1306	0.208064	0.250943	0.128391	0.186793	0.114827	0.141906	0.1593	0.213996
uniform	2n = 4x	5	5	ML	0.0871889	0.158679	0.0725765	0.0142808	0.0539702	0.106002	0.219922	0.27	0.21	0.32	0.21	0.11	0.29	0.4794	0.217186	0.253078	0.185983	0.227081	0.167429	0.204404	0.194139	0.259511
uniform	2n = 4x	5	5	RI	0.227805	0.23277	0.0446494	0.0822988	0.0507255	0.0391375	0.108219	0.1	0	0.3	0.2	0.3	0.3	0.14	0.273776	0.128664	0.170522	0.0974034	0.127785	0.212627	0.00558051	0.187597
uniform	2n = 4x	5	5	LO	0.15695	0.207714	0.0462711	0.0911279	0.077301	0.0537684	0.105504	0	0.1	0.2	0.2	0.2	0.1	0.174	0.284194	0.141386	0.175539	0.114285	0.133201	0.217237	0.0163647	0.210035
uniform	2n = 4x	5	5	WE	0.187472	0.236284	0.0617213	0.12848	0.108049	0.0161902	0.0767348	0	0	0.2	0.2	0.2	0.1	0.188	0.296465	0.13593	0.189149	0.106296	0.145989	0.231591	0.0114528	0.199244
uniform	2n = 4x	5	5	VR	NA	NA	NA	NA	NA	NA	NA	NA	NA	NA	NA	NA	NA	NA	NA	NA	NA	NA	NA	NA	NA	NA
uniform	2n = 4x	5	5	PD	NA	NA	NA	NA	NA	NA	NA	NA	NA	NA	NA	NA	NA	NA	NA	NA	NA	NA	NA	NA	NA	NA
uniform	2n = 4x	5	5	FA	NA	NA	NA	NA	NA	NA	NA	NA	NA	NA	NA	NA	NA	NA	NA	NA	NA	NA	NA	NA	NA	NA
uniform	2n = 6x	5	5	MM	0.121358	0.152229	0.0236272	0.079128	0.0240835	0.019363	0.0976704	0.19	0.16	0.19	0.1	0.17	0.08	0.1042	0.116731	0.189201	0.0649157	0.128632	0.0524895	0.0773218	0.103004	0.154089
uniform	2n = 6x	5	5	ML	0.106764	0.114573	0.068881	0.0025901	0.0887002	0.128264	0.220796	0.17	0.28	0.08	0.07	0.15	0.23	0.4682	0.129385	0.21212	0.111106	0.19333	0.0920337	0.130096	0.159418	0.226785
uniform	2n = 6x	5	5	RI	0.281725	0.0447784	0.194702	0.184914	0.0875813	0.0841612	0.084319	0	0	0.1	0	0	0.1	0.1	0.07373	0.17208	0.0436029	0.114413	0.00156146	0.0854906	0.0341925	0.193168
uniform	2n = 6x	5	5	LO	0.265323	0.101939	0.0876774	0.189633	0.083881	0.0420536	0.0727977	0.1	0.2	0.2	0.1	0.2	0	0.172	0.0798597	0.225852	0.0485356	0.161908	0.00532788	0.0915625	0.0764816	0.244976
uniform	2n = 6x	5	5	WE	0.277193	0.108636	0.0860743	0.189521	0.0717043	0.0422483	0.0646574	0.1	0.2	0.2	0.1	0.2	0.1	0.154	0.102129	0.23003	0.064977	0.163506	0.0198475	0.109842	0.0789061	0.245767
uniform	2n = 6x	5	5	VR	NA	NA	NA	NA	NA	NA	NA	NA	NA	NA	NA	NA	NA	NA	NA	NA	NA	NA	NA	NA	NA	NA
uniform	2n = 6x	5	5	PD	NA	NA	NA	NA	NA	NA	NA	NA	NA	NA	NA	NA	NA	NA	NA	NA	NA	NA	NA	NA	NA	NA
uniform	2n = 6x	5	5	FA	NA	NA	NA	NA	NA	NA	NA	NA	NA	NA	NA	NA	NA	NA	NA	NA	NA	NA	NA	NA	NA	NA
uniform	2n = 8x	5	5	MM	0.322593	0.325185	0.10166	0.114346	0.0491212	0.0540111	0.127525	0.09	0.11	0.16	0.11	0.13	0.15	0.0814	0.101357	0.102864	0.0535193	0.068342	0.0417089	0.0653148	0.0429482	0.0936476
uniform	2n = 8x	5	5	ML	0.217784	0.203637	0.0795512	0.0060053	0.00265329	0.0867213	0.246522	0.3	0.1	0.1	0.2	0.2	0.3	0.45	0.106289	0.0766725	0.0865402	0.0595283	0.0288739	0.143632	-0.0351201	0.153118
uniform	2n = 8x	5	5	RI	0.294476	0.376397	0.201035	0.105825	0.0887482	0.0594796	0.0969001	0.1	0.2	0.1	0.2	0.1	0	0.106	0.0949009	0.132663	0.0517739	0.0882329	0.0130239	0.0903686	0.00761188	0.167714
uniform	2n = 8x	5	5	LO	0.333349	0.455362	0.224974	0.210528	0.0735952	0.0599573	0.0863321	0	0	0.1	0.1	0.1	0.1	0.15	0.0780568	0.167579	0.046042	0.125639	0.00408861	0.0878336	0.0351707	0.214065
uniform	2n = 8x	5	5	WE	0.337351	0.459152	0.242968	0.222621	0.0865484	0.0389128	0.0773977	0.1	0	0.1	0	0.1	0.3	0.146	0.0948609	0.163243	0.0569931	0.111535	0.0143287	0.0994504	0.0288492	0.192705
uniform	2n = 8x	5	5	VR	NA	NA	NA	NA	NA	NA	NA	NA	NA	NA	NA	NA	NA	NA	NA	NA	NA	NA	NA	NA	NA	NA
uniform	2n = 8x	5	5	PD	NA	NA	NA	NA	NA	NA	NA	NA	NA	NA	NA	NA	NA	NA	NA	NA	NA	NA	NA	NA	NA	NA
uniform	2n = 8x	5	5	FA	NA	NA	NA	NA	NA	NA	NA	NA	NA	NA	NA	NA	NA	NA	NA	NA	NA	NA	NA	NA	NA	NA
uniform	2n = 4x*	5	5	MM	0.106066	0.129769	0.0150491	0.0867494	0.0757506	0.0710638	0.0886281	0.17	0.14	0.07	0.13	0.09	0.15	0.1304	0.231904	0.263118	0.142002	0.200497	0.128586	0.155365	0.172523	0.228149
uniform	2n = 4x*	5	5	ML	0.0590789	0.0773143	0.0611863	0.00122438	0.0408767	0.0670836	0.218685	0.25	0.28	0.14	0.18	0.09	0.23	0.4854	0.234971	0.26262	0.206826	0.236698	0.187915	0.225583	0.203738	0.269122
uniform	2n = 4x*	5	5	RI	0.17284	0.0934252	0.0317973	0.000398674	0.0606214	0.0327839	0.0824499	0.2	0.3	0.2	0	0.1	0.1	0.11	0.227868	0.27687	0.146307	0.212281	0.101694	0.190333	0.122598	0.298525
uniform	2n = 4x*	5	5	LO	0.0993843	0.149281	0.122284	0.0437998	0.0898819	0.0205769	0.0892245	0.2	0.1	0.2	0.3	0.3	0.3	0.136	0.268477	0.292106	0.172289	0.237282	0.12827	0.21563	0.142957	0.327335
uniform	2n = 4x*	5	5	WE	0.118773	0.177283	0.0936807	0.0637827	0.0724351	0.00253571	0.0691448	0	0.3	0.1	0.3	0.3	0	0.162	0.284513	0.291273	0.184291	0.224952	0.140436	0.227424	0.134433	0.311748
uniform	2n = 4x*	5	5	VR	NA	NA	NA	NA	NA	NA	NA	NA	NA	NA	NA	NA	NA	NA	NA	NA	NA	NA	NA	NA	NA	NA
uniform	2n = 4x*	5	5	PD	NA	NA	NA	NA	NA	NA	NA	NA	NA	NA	NA	NA	NA	NA	NA	NA	NA	NA	NA	NA	NA	NA
uniform	2n = 4x*	5	5	FA	NA	NA	NA	NA	NA	NA	NA	NA	NA	NA	NA	NA	NA	NA	NA	NA	NA	NA	NA	NA	NA	NA
uniform	2n = 6x*	5	5	MM	0.193802	0.271627	0.0201761	0.0714398	0.0185452	0.0688454	0.0917373	0.13	0.13	0.16	0.07	0.16	0.15	0.1068	0.142033	0.212532	0.076746	0.144525	0.0646873	0.0887822	0.119036	0.169823
uniform	2n = 6x*	5	5	ML	0.145412	0.198635	0.0259304	0.00344588	0.0700064	0.0818823	0.214402	0.15	0.12	0.08	0.13	0.11	0.3	0.4836	0.161408	0.23964	0.144684	0.221667	0.124947	0.164307	0.187635	0.255167
uniform	2n = 6x*	5	5	RI	0.209703	0.385762	0.19605	0.016186	0.0387264	0.180068	0.107612	0.1	0	0.1	0.3	0.2	0	0.108	0.0887329	0.17	0.0469046	0.116945	0.00934669	0.0843303	0.0340293	0.198262
uniform	2n = 6x*	5	5	LO	0.145184	0.313528	0.140992	0.0178811	0.0614827	0.155405	0.10375	0	0	0.1	0.4	0	0.2	0.116	0.0558309	0.16786	0.0301777	0.121641	-0.00828764	0.0685538	0.0341597	0.207273
uniform	2n = 6x*	5	5	WE	0.168581	0.317313	0.140968	0.0391392	0.0414126	0.173336	0.0867412	0	0.2	0.1	0.2	0.3	0.1	0.132	0.0804531	0.169726	0.0443082	0.117544	0.00514575	0.083335	0.0338078	0.199642
uniform	2n = 6x*	5	5	VR	NA	NA	NA	NA	NA	NA	NA	NA	NA	NA	NA	NA	NA	NA	NA	NA	NA	NA	NA	NA	NA	NA
uniform	2n = 6x*	5	5	PD	NA	NA	NA	NA	NA	NA	NA	NA	NA	NA	NA	NA	NA	NA	NA	NA	NA	NA	NA	NA	NA	NA
uniform	2n = 6x*	5	5	FA	NA	NA	NA	NA	NA	NA	NA	NA	NA	NA	NA	NA	NA	NA	NA	NA	NA	NA	NA	NA	NA	NA
uniform	2n = 8x*	5	5	MM	0.298328	0.326321	0.0648744	0.140613	0.0125354	0.058328	0.141172	0.06	0.12	0.1	0.11	0.07	0.09	0.0793	0.111147	0.102102	0.0595534	0.0685745	0.0475797	0.0715101	0.0428976	0.0941609
uniform	2n = 8x*	5	5	ML	0.289923	0.355257	0.0222729	0.152647	0.0740626	0.126932	0.251304	0.2	0.1	0.2	0.1	0	0.3	0.44	0.0873767	-0.0243624	0.0721856	-0.0220168	0.0135478	0.130329	-0.131528	0.0880252
uniform	2n = 8x*	5	5	RI	0.375496	0.599824	0.177711	0.159164	0.00434235	0.0411705	0.0890638	0	0	0	0.1	0.1	0.1	0.098	0.101362	0.0173552	0.058419	0.012121	0.0175272	0.0991157	-0.0729657	0.0970324
uniform	2n = 8x*	5	5	LO	0.394476	0.509558	0.170567	0.220908	0.00922318	0.0250655	0.0755423	0	0	0.2	0.2	0.1	0.2	0.15	0.118035	0.000301258	0.0765757	0.000224421	0.0305665	0.122261	-0.0904278	0.090873
uniform	2n = 8x*	5	5	WE	0.394028	0.545972	0.15527	0.219403	0.0246791	0.0579111	0.0643294	0	0	0.2	0	0.1	0.2	0.14	0.112468	-0.00612819	0.0725097	-0.00432758	0.0268355	0.117882	-0.0902499	0.0816587
uniform	2n = 8x*	5	5	VR	NA	NA	NA	NA	NA	NA	NA	NA	NA	NA	NA	NA	NA	NA	NA	NA	NA	NA	NA	NA	NA	NA
uniform	2n = 8x*	5	5	PD	NA	NA	NA	NA	NA	NA	NA	NA	NA	NA	NA	NA	NA	NA	NA	NA	NA	NA	NA	NA	NA	NA
uniform	2n = 8x*	5	5	FA	NA	NA	NA	NA	NA	NA	NA	NA	NA	NA	NA	NA	NA	NA	NA	NA	NA	NA	NA	NA	NA	NA
uniform	2n = 2x	10	5	MM	0.00200106	0.0500209	0.0248636	0.00058559	0.0332756	0.00244921	0.0891339	0.33	0.26	0.24	0.19	0.18	0.21	0.2092	0.545501	0.648459	0.415791	0.585861	0.401877	0.429512	0.563686	0.607192
uniform	2n = 2x	10	5	ML	0.0284033	0.027794	0.000929078	0.0155915	0.0140635	0.0540943	0.163118	0.74	0.26	0.22	0.33	0.21	0.36	0.5564	0.590127	0.726628	0.55866	0.700908	0.544144	0.572841	0.681925	0.718948
uniform	2n = 2x	10	5	RI	0.0183343	0.0364766	0.15491	0.0337658	0.0877837	0.0702465	0.079898	0.2	0.3	0.3	0.3	0.2	0.4	0.196	0.593447	0.672697	0.487203	0.619945	0.443218	0.528847	0.54888	0.682113
uniform	2n = 2x	10	5	LO	0.0503376	0.01439	0.164421	0.00269302	0.0670383	0.0658456	0.0922977	0.1	0.3	0.2	0.1	0.4	0.3	0.212	0.599618	0.651099	0.469878	0.590003	0.426341	0.511242	0.517357	0.654207
uniform	2n = 2x	10	5	WE	0.0284386	0.0608807	0.216074	0.0330213	0.108422	0.121044	0.0572474	0.1	0.2	0.1	0	0.2	0.3	0.264	0.616815	0.646435	0.517758	0.578924	0.476351	0.556874	0.505529	0.644
uniform	2n = 2x	10	5	VR	NA	NA	NA	NA	NA	NA	NA	NA	NA	NA	NA	NA	NA	NA	NA	NA	NA	NA	NA	NA	NA	NA
uniform	2n = 2x	10	5	PD	NA	NA	NA	NA	NA	NA	NA	NA	NA	NA	NA	NA	NA	NA	NA	NA	NA	NA	NA	NA	NA	NA
uniform	2n = 2x	10	5	FA	NA	NA	NA	NA	NA	NA	NA	NA	NA	NA	NA	NA	NA	NA	NA	NA	NA	NA	NA	NA	NA	NA
uniform	2n = 4x	10	5	MM	0.103893	0.233092	0.0153209	0.0597506	0.0144709	0.0360849	0.0946536	0.16	0.07	0.18	0.16	0.19	0.13	0.158	0.281404	0.338101	0.190114	0.282025	0.175499	0.204645	0.252493	0.311032
uniform	2n = 4x	10	5	ML	0.0841324	0.200516	0.0506679	0.01797	0.0730499	0.0967523	0.190237	0.27	0.1	0.28	0.29	0.13	0.25	0.52	0.275416	0.347214	0.257832	0.337933	0.238168	0.277285	0.304412	0.370618
uniform	2n = 4x	10	5	RI	0.0682145	0.300423	0.079617	0.138152	0.14957	0.0972716	0.105127	0.3	0.1	0.1	0.1	0.2	0.4	0.18	0.266635	0.395222	0.177869	0.32429	0.131729	0.22324	0.234297	0.408773
uniform	2n = 4x	10	5	LO	0.0891972	0.301049	0.0394595	0.110483	0.148421	0.0511661	0.0995179	0.2	0	0	0.1	0.1	0.5	0.176	0.291251	0.404271	0.193838	0.33594	0.148175	0.238676	0.245327	0.420733
uniform	2n = 4x	10	5	WE	0.0963229	0.317583	0.0267813	0.128333	0.161351	0.0748207	0.0822187	0.2	0	0	0.2	0.1	0.4	0.16	0.318743	0.402253	0.224516	0.32508	0.177226	0.270772	0.235978	0.408761
uniform	2n = 4x	10	5	VR	NA	NA	NA	NA	NA	NA	NA	NA	NA	NA	NA	NA	NA	NA	NA	NA	NA	NA	NA	NA	NA	NA
uniform	2n = 4x	10	5	PD	NA	NA	NA	NA	NA	NA	NA	NA	NA	NA	NA	NA	NA	NA	NA	NA	NA	NA	NA	NA	NA	NA
uniform	2n = 4x	10	5	FA	NA	NA	NA	NA	NA	NA	NA	NA	NA	NA	NA	NA	NA	NA	NA	NA	NA	NA	NA	NA	NA	NA
uniform	2n = 6x	10	5	MM	0.130368	0.181099	0.0108799	0.101413	0.00137793	0.000609495	0.0990364	0.14	0.14	0.2	0.17	0.11	0.13	0.1304	0.17468	0.250942	0.108889	0.198047	0.0950528	0.122683	0.168941	0.226807
uniform	2n = 6x	10	5	ML	0.106317	0.163833	0.0296003	0.0439841	0.0486581	0.084489	0.193856	0.2	0.22	0.18	0.12	0.15	0.24	0.4944	0.196683	0.279598	0.184627	0.2707	0.164208	0.204887	0.235893	0.304813
uniform	2n = 6x	10	5	RI	0.115012	0.0479133	0.233776	0.19267	0.0139922	0.108455	0.0980335	0.4	0.2	0	0.3	0.2	0.1	0.126	0.142241	0.288121	0.0891478	0.231871	0.0447811	0.133164	0.138143	0.321483
uniform	2n = 6x	10	5	LO	0.159163	0.10065	0.200831	0.22233	0.0262072	0.109295	0.0939489	0.1	0.1	0	0.2	0.2	0.1	0.166	0.14664	0.25099	0.0930282	0.201509	0.0480947	0.137586	0.106604	0.292775
uniform	2n = 6x	10	5	WE	0.15742	0.109849	0.203971	0.23483	0.0300594	0.12739	0.0790935	0.1	0	0	0.2	0.1	0.1	0.178	0.174559	0.250928	0.118072	0.200215	0.0704255	0.16518	0.105846	0.29101
uniform	2n = 6x	10	5	VR	NA	NA	NA	NA	NA	NA	NA	NA	NA	NA	NA	NA	NA	NA	NA	NA	NA	NA	NA	NA	NA	NA
uniform	2n = 6x	10	5	PD	NA	NA	NA	NA	NA	NA	NA	NA	NA	NA	NA	NA	NA	NA	NA	NA	NA	NA	NA	NA	NA	NA
uniform	2n = 6x	10	5	FA	NA	NA	NA	NA	NA	NA	NA	NA	NA	NA	NA	NA	NA	NA	NA	NA	NA	NA	NA	NA	NA	NA
uniform	2n = 8x	10	5	MM	0.273355	0.320517	0.107463	0.13566	0.0241183	0.0465723	0.134569	0.14	0.07	0.13	0.14	0.1	0.13	0.1084	0.127934	0.122322	0.0773282	0.0929513	0.0638511	0.090777	0.0639943	0.121752
uniform	2n = 8x	10	5	ML	0.233588	0.275998	0.142723	0.00473455	0.0143778	0.0442802	0.212584	0.2	0.2	0.1	0.2	0.2	0.2	0.502	0.148198	0.126183	0.13497	0.114579	0.0709678	0.197865	0.00428702	0.222117
uniform	2n = 8x	10	5	RI	0.262887	0.424027	0.233255	0.104983	0.0983991	0.0755891	0.0876766	0.3	0.1	0	0.1	0.3	0.3	0.118	0.119738	0.0445447	0.0707538	0.0333404	0.0288394	0.11242	-0.0578997	0.124028
uniform	2n = 8x	10	5	LO	0.342678	0.391039	0.23404	0.143723	0.107359	0.0499472	0.0895373	0.1	0	0.1	0.1	0.2	0.1	0.158	0.135785	0.0545508	0.0839258	0.0437127	0.0400887	0.127441	-0.0539996	0.140596
uniform	2n = 8x	10	5	WE	0.382826	0.412502	0.25513	0.199715	0.138474	0.0969062	0.0927836	0	0.1	0.1	0.1	0.2	0.2	0.168	0.124207	0.0540632	0.0814286	0.0455909	0.0349725	0.127533	-0.05719	0.147416
uniform	2n = 8x	10	5	VR	NA	NA	NA	NA	NA	NA	NA	NA	NA	NA	NA	NA	NA	NA	NA	NA	NA	NA	NA	NA	NA	NA
uniform	2n = 8x	10	5	PD	NA	NA	NA	NA	NA	NA	NA	NA	NA	NA	NA	NA	NA	NA	NA	NA	NA	NA	NA	NA	NA	NA
uniform	2n = 8x	10	5	FA	NA	NA	NA	NA	NA	NA	NA	NA	NA	NA	NA	NA	NA	NA	NA	NA	NA	NA	NA	NA	NA	NA
uniform	2n = 4x*	10	5	MM	0.124127	0.201945	0.0061868	0.0925733	0.039308	0.0092345	0.0857802	0.15	0.06	0.16	0.19	0.17	0.23	0.1566	0.291393	0.345098	0.19313	0.288229	0.178765	0.207413	0.258703	0.317217
uniform	2n = 4x*	10	5	ML	0.0892265	0.162477	0.0316885	0.0307238	0.0397474	0.0761238	0.186621	0.21	0.12	0.26	0.24	0.21	0.26	0.5334	0.297159	0.345309	0.280886	0.339252	0.261263	0.300276	0.305419	0.372229
uniform	2n = 4x*	10	5	RI	0.176669	0.288865	0.122943	0.085172	0.0667416	0.123149	0.0841828	0.2	0	0.3	0.4	0.1	0.2	0.148	0.27248	0.294279	0.181535	0.242432	0.135243	0.227036	0.146196	0.334122
uniform	2n = 4x*	10	5	LO	0.16761	0.307047	0.120084	0.0659171	0.0651528	0.0912641	0.090048	0.2	0	0.1	0.2	0.2	0.2	0.148	0.322985	0.301889	0.221479	0.258321	0.174442	0.267508	0.158684	0.352748
uniform	2n = 4x*	10	5	WE	0.200907	0.3191	0.139296	0.086269	0.0885863	0.101753	0.0638114	0.2	0	0.2	0.2	0.1	0.1	0.154	0.352403	0.308866	0.265552	0.26653	0.215431	0.314278	0.166561	0.361075
uniform	2n = 4x*	10	5	VR	NA	NA	NA	NA	NA	NA	NA	NA	NA	NA	NA	NA	NA	NA	NA	NA	NA	NA	NA	NA	NA	NA
uniform	2n = 4x*	10	5	PD	NA	NA	NA	NA	NA	NA	NA	NA	NA	NA	NA	NA	NA	NA	NA	NA	NA	NA	NA	NA	NA	NA
uniform	2n = 4x*	10	5	FA	NA	NA	NA	NA	NA	NA	NA	NA	NA	NA	NA	NA	NA	NA	NA	NA	NA	NA	NA	NA	NA	NA
uniform	2n = 6x*	10	5	MM	0.200582	0.242691	0.0301555	0.094479	0.0306121	0.0452093	0.0952937	0.12	0.09	0.18	0.17	0.16	0.2	0.1388	0.197033	0.258751	0.122293	0.2093	0.108547	0.135992	0.179533	0.238684
uniform	2n = 6x*	10	5	ML	0.158468	0.202208	0.00723271	0.0375823	0.0445399	0.0562845	0.193606	0.21	0.16	0.11	0.15	0.19	0.26	0.501	0.222894	0.282385	0.211021	0.278787	0.190634	0.231226	0.243427	0.313408
uniform	2n = 6x*	10	5	RI	0.260562	0.369679	0.150302	0.170835	0.0201272	0.037479	0.0973092	0.1	0	0.1	0.2	0.4	0.2	0.14	0.183845	0.237195	0.11363	0.192792	0.0700987	0.15673	0.0962225	0.285767
uniform	2n = 6x*	10	5	LO	0.212059	0.344011	0.118601	0.141029	0.0168865	0.000808663	0.100421	0	0	0.3	0.1	0.3	0.3	0.168	0.183016	0.271733	0.117922	0.228941	0.0725141	0.162842	0.130114	0.323264
uniform	2n = 6x*	10	5	WE	0.207533	0.362332	0.12321	0.138516	0.0109788	0.0071122	0.0832052	0	0.1	0.2	0.1	0.4	0.2	0.176	0.207741	0.281285	0.139974	0.229332	0.0928372	0.186485	0.133574	0.320847
uniform	2n = 6x*	10	5	VR	NA	NA	NA	NA	NA	NA	NA	NA	NA	NA	NA	NA	NA	NA	NA	NA	NA	NA	NA	NA	NA	NA
uniform	2n = 6x*	10	5	PD	NA	NA	NA	NA	NA	NA	NA	NA	NA	NA	NA	NA	NA	NA	NA	NA	NA	NA	NA	NA	NA	NA
uniform	2n = 6x*	10	5	FA	NA	NA	NA	NA	NA	NA	NA	NA	NA	NA	NA	NA	NA	NA	NA	NA	NA	NA	NA	NA	NA	NA
uniform	2n = 8x*	10	5	MM	0.342252	0.327817	0.1042	0.1103	0.02665	0.0315644	0.143168	0.08	0.09	0.14	0.14	0.11	0.09	0.1152	0.110145	0.146861	0.0676398	0.112494	0.0539146	0.0813394	0.0834365	0.14136
uniform	2n = 8x*	10	5	ML	0.294895	0.318826	0.0723875	0.0423221	0.008743	0.0436593	0.213616	0	0.1	0.1	0.3	0	0.2	0.49	0.0254542	0.143227	0.023125	0.138779	-0.0415181	0.0875753	0.0214612	0.252328
uniform	2n = 8x*	10	5	RI	0.380783	0.404097	0.189859	0.083294	0.117049	0.104579	0.0805854	0	0	0.2	0	0	0	0.124	0.0230588	0.158765	0.0137779	0.114134	-0.0287488	0.0562548	0.0269794	0.199566
uniform	2n = 8x*	10	5	LO	0.410681	0.417049	0.17683	0.0896153	0.101807	0.136323	0.0754964	0.1	0	0.1	0.1	0	0.1	0.172	0.0247361	0.154882	0.0160494	0.118831	-0.0301319	0.0621624	0.0256657	0.20995
uniform	2n = 8x*	10	5	WE	0.419395	0.421342	0.186545	0.0904064	0.100636	0.127228	0.0672192	0.1	0	0	0	0	0	0.128	0.0312178	0.117985	0.0185211	0.0805822	-0.0237138	0.0606899	-0.00273028	0.162784
uniform	2n = 8x*	10	5	VR	NA	NA	NA	NA	NA	NA	NA	NA	NA	NA	NA	NA	NA	NA	NA	NA	NA	NA	NA	NA	NA	NA
uniform	2n = 8x*	10	5	PD	NA	NA	NA	NA	NA	NA	NA	NA	NA	NA	NA	NA	NA	NA	NA	NA	NA	NA	NA	NA	NA	NA
uniform	2n = 8x*	10	5	FA	NA	NA	NA	NA	NA	NA	NA	NA	NA	NA	NA	NA	NA	NA	NA	NA	NA	NA	NA	NA	NA	NA
uniform	2n = 2x	15	5	MM	3.96711e-05	0.00670028	0.0110936	0.00573714	0.00562107	0.000480311	0.091839	0.42	0.3	0.27	0.23	0.27	0.27	0.269	0.643699	0.724868	0.522475	0.681178	0.509422	0.535288	0.66233	0.699165
uniform	2n = 2x	15	5	ML	0.0304236	0.00569197	0.00839958	0.0245111	0.0270235	0.037295	0.149169	0.8	0.34	0.29	0.23	0.26	0.4	0.5904	0.683414	0.786509	0.654393	0.768922	0.642088	0.66636	0.753373	0.783611
uniform	2n = 2x	15	5	RI	0.00812936	0.0173258	0.0232749	0.0748111	0.00441275	0.06786	0.0905247	0.2	0.3	0.5	0.4	0.1	0.4	0.27	0.653277	0.739317	0.527243	0.697329	0.485391	0.566684	0.636759	0.749345
uniform	2n = 2x	15	5	LO	0.0330992	0.0215831	0.0551112	0.114127	0.0178595	0.0580817	0.102323	0.2	0.2	0.3	0.3	0	0.3	0.276	0.631569	0.746757	0.475568	0.705369	0.433381	0.515676	0.645716	0.756465
uniform	2n = 2x	15	5	WE	0.0171466	0.00120194	0.0118067	0.0765362	0.0263173	0.0265595	0.0723265	0.1	0.2	0.2	0.2	0.1	0.4	0.278	0.654692	0.758855	0.564079	0.709952	0.52387	0.601779	0.651921	0.759715
uniform	2n = 2x	15	5	VR	NA	NA	NA	NA	NA	NA	NA	NA	NA	NA	NA	NA	NA	NA	NA	NA	NA	NA	NA	NA	NA	NA
uniform	2n = 2x	15	5	PD	NA	NA	NA	NA	NA	NA	NA	NA	NA	NA	NA	NA	NA	NA	NA	NA	NA	NA	NA	NA	NA	NA
uniform	2n = 2x	15	5	FA	NA	NA	NA	NA	NA	NA	NA	NA	NA	NA	NA	NA	NA	NA	NA	NA	NA	NA	NA	NA	NA	NA
uniform	2n = 4x	15	5	MM	0.0840338	0.218944	0.00451068	0.0452746	0.0194158	0.0141377	0.0920015	0.15	0.03	0.26	0.22	0.23	0.19	0.1766	0.303696	0.359258	0.21513	0.315613	0.199904	0.230252	0.285067	0.34552
uniform	2n = 4x	15	5	ML	0.0685053	0.186718	0.0283401	0.00969737	0.0271663	0.0592345	0.175784	0.21	0.07	0.41	0.31	0.24	0.29	0.5542	0.29424	0.374088	0.278223	0.370481	0.258533	0.297682	0.337195	0.402841
uniform	2n = 4x	15	5	RI	0.0942778	0.297376	0.0801983	0.0654709	0.190003	0.0407605	0.111357	0.5	0.1	0.2	0.2	0	0	0.196	0.290656	0.386487	0.203775	0.336625	0.155499	0.251081	0.240945	0.425826
uniform	2n = 4x	15	5	LO	0.0771841	0.286712	0.109147	0.0748341	0.133919	0.0263412	0.109985	0.3	0	0.2	0.2	0.2	0	0.21	0.310389	0.418705	0.218186	0.364328	0.169929	0.265399	0.270979	0.450888
uniform	2n = 4x	15	5	WE	0.0855962	0.305986	0.112641	0.0873333	0.144627	0.0411356	0.0914661	0.4	0	0.1	0.1	0.2	0	0.194	0.355988	0.425954	0.273995	0.364165	0.222965	0.323528	0.272159	0.449572
uniform	2n = 4x	15	5	VR	NA	NA	NA	NA	NA	NA	NA	NA	NA	NA	NA	NA	NA	NA	NA	NA	NA	NA	NA	NA	NA	NA
uniform	2n = 4x	15	5	PD	NA	NA	NA	NA	NA	NA	NA	NA	NA	NA	NA	NA	NA	NA	NA	NA	NA	NA	NA	NA	NA	NA
uniform	2n = 4x	15	5	FA	NA	NA	NA	NA	NA	NA	NA	NA	NA	NA	NA	NA	NA	NA	NA	NA	NA	NA	NA	NA	NA	NA
uniform	2n = 6x	15	5	MM	0.127305	0.181921	0.000490204	0.0900476	0.00462026	0.00264725	0.100609	0.17	0.19	0.19	0.12	0.19	0.13	0.1566	0.215511	0.282272	0.141155	0.232916	0.126721	0.15553	0.202895	0.262501
uniform	2n = 6x	15	5	ML	0.110004	0.160145	0.0255011	0.0581949	0.0509389	0.0685347	0.184127	0.26	0.2	0.14	0.12	0.16	0.27	0.5084	0.215371	0.314518	0.204729	0.310352	0.184191	0.225088	0.275688	0.344211
uniform	2n = 6x	15	5	RI	0.126214	0.139961	0.149124	0.189669	0.00182045	0.0814552	0.0742192	0.2	0.3	0	0	0.1	0.2	0.14	0.131695	0.287727	0.081558	0.220731	0.0376053	0.125196	0.130984	0.306888
uniform	2n = 6x	15	5	LO	0.193814	0.0959993	0.167254	0.175182	0.00663469	0.0476529	0.0758697	0.2	0.1	0	0	0.1	0.3	0.176	0.186461	0.342117	0.118173	0.268468	0.0733267	0.162543	0.178511	0.353975
uniform	2n = 6x	15	5	WE	0.206319	0.10999	0.150239	0.203676	0.0175696	0.0745773	0.05908	0.2	0.1	0.1	0	0.1	0.3	0.166	0.218461	0.343604	0.146398	0.26453	0.0993118	0.192831	0.176027	0.348791
uniform	2n = 6x	15	5	VR	NA	NA	NA	NA	NA	NA	NA	NA	NA	NA	NA	NA	NA	NA	NA	NA	NA	NA	NA	NA	NA	NA
uniform	2n = 6x	15	5	PD	NA	NA	NA	NA	NA	NA	NA	NA	NA	NA	NA	NA	NA	NA	NA	NA	NA	NA	NA	NA	NA	NA
uniform	2n = 6x	15	5	FA	NA	NA	NA	NA	NA	NA	NA	NA	NA	NA	NA	NA	NA	NA	NA	NA	NA	NA	NA	NA	NA	NA
uniform	2n = 8x	15	5	MM	0.304317	0.356279	0.114362	0.137744	0.0356021	0.0355111	0.127474	0.1	0.08	0.11	0.15	0.09	0.14	0.1272	0.140753	0.16416	0.0904766	0.130041	0.0761721	0.104744	0.100119	0.159728
uniform	2n = 8x	15	5	ML	0.234693	0.306518	0.152954	0.0326374	0.0355601	0.0482132	0.20729	0.1	0.1	0	0.2	0	0.1	0.49	0.12084	0.188346	0.108476	0.177229	0.0450575	0.171023	0.0642837	0.28569
uniform	2n = 8x	15	5	RI	0.267963	0.444633	0.269508	0.137747	0.0394643	0.0169876	0.0989738	0.1	0	0.1	0.1	0.1	0	0.16	0.123556	0.162637	0.075244	0.123435	0.0320603	0.118147	0.0315522	0.213248
uniform	2n = 8x	15	5	LO	0.298642	0.457596	0.261544	0.138275	0.0652224	0.00910146	0.0894897	0.1	0	0.3	0.4	0.1	0	0.174	0.139613	0.169641	0.0910738	0.139508	0.0447891	0.136968	0.0399712	0.236303
uniform	2n = 8x	15	5	WE	0.323702	0.462814	0.279308	0.166694	0.0794398	0.0266788	0.085422	0.1	0	0.1	0.1	0.1	0.2	0.188	0.130182	0.126874	0.0954194	0.0955787	0.0435852	0.146741	0.0038133	0.185748
uniform	2n = 8x	15	5	VR	NA	NA	NA	NA	NA	NA	NA	NA	NA	NA	NA	NA	NA	NA	NA	NA	NA	NA	NA	NA	NA	NA
uniform	2n = 8x	15	5	PD	NA	NA	NA	NA	NA	NA	NA	NA	NA	NA	NA	NA	NA	NA	NA	NA	NA	NA	NA	NA	NA	NA
uniform	2n = 8x	15	5	FA	NA	NA	NA	NA	NA	NA	NA	NA	NA	NA	NA	NA	NA	NA	NA	NA	NA	NA	NA	NA	NA	NA
uniform	2n = 4x*	15	5	MM	0.128463	0.183985	0.010965	0.0933285	0.0400633	0.0311155	0.0884015	0.17	0.11	0.15	0.14	0.18	0.28	0.177	0.337213	0.397444	0.229615	0.350401	0.21501	0.244117	0.320401	0.379698
uniform	2n = 4x*	15	5	ML	0.103207	0.170718	0.0175027	0.0496258	0.0153636	0.0424798	0.173457	0.16	0.13	0.32	0.35	0.19	0.32	0.5602	0.337929	0.426851	0.318859	0.426074	0.29967	0.337789	0.39416	0.456961
uniform	2n = 4x*	15	5	RI	0.0837873	0.134419	0.0475769	0.103165	0.0499568	0.0448246	0.0826907	0.3	0.3	0.1	0.1	0.4	0.1	0.188	0.274591	0.417208	0.186356	0.354366	0.139174	0.232693	0.261543	0.440694
uniform	2n = 4x*	15	5	LO	0.0813298	0.124589	0.015026	0.10401	0.0435877	0.0420789	0.0872304	0.1	0	0.2	0.1	0.7	0.4	0.196	0.308246	0.446789	0.206632	0.395909	0.160149	0.252201	0.301979	0.482227
uniform	2n = 4x*	15	5	WE	0.0801607	0.153335	0.0229065	0.109214	0.0485231	0.0533875	0.066767	0.1	0.1	0.3	0.1	0.5	0.3	0.184	0.360116	0.439418	0.264455	0.379955	0.215058	0.312502	0.28704	0.465787
uniform	2n = 4x*	15	5	VR	NA	NA	NA	NA	NA	NA	NA	NA	NA	NA	NA	NA	NA	NA	NA	NA	NA	NA	NA	NA	NA	NA
uniform	2n = 4x*	15	5	PD	NA	NA	NA	NA	NA	NA	NA	NA	NA	NA	NA	NA	NA	NA	NA	NA	NA	NA	NA	NA	NA	NA
uniform	2n = 4x*	15	5	FA	NA	NA	NA	NA	NA	NA	NA	NA	NA	NA	NA	NA	NA	NA	NA	NA	NA	NA	NA	NA	NA	NA
uniform	2n = 6x*	15	5	MM	0.18447	0.23283	0.0205179	0.0496591	0.0149783	0.020086	0.0949403	0.19	0.08	0.16	0.17	0.14	0.17	0.1442	0.218342	0.286727	0.139906	0.239187	0.125755	0.154001	0.208801	0.269112
uniform	2n = 6x*	15	5	ML	0.155486	0.206154	0.000508058	0.0203191	0.0523854	0.0555178	0.184397	0.3	0.16	0.16	0.12	0.19	0.28	0.5132	0.239136	0.327672	0.227269	0.327424	0.20692	0.247421	0.292702	0.361284
uniform	2n = 6x*	15	5	RI	0.206792	0.274861	0.125926	0.0105686	0.022482	0.0384163	0.0955019	0.3	0.1	0.4	0.3	0.1	0.1	0.14	0.201609	0.37697	0.132838	0.311509	0.0866006	0.178504	0.218424	0.398976
uniform	2n = 6x*	15	5	LO	0.14118	0.279003	0.0826667	0.0608739	0.0475545	0.0196013	0.0918375	0.3	0.1	0.2	0.2	0	0.4	0.192	0.220561	0.34408	0.147359	0.299399	0.100532	0.193535	0.199904	0.392783
uniform	2n = 6x*	15	5	WE	0.129865	0.295212	0.0797756	0.0610154	0.0593584	0.0202315	0.081164	0.2	0	0	0.1	0	0.3	0.18	0.247102	0.357168	0.176762	0.299358	0.127302	0.225346	0.203449	0.389576
uniform	2n = 6x*	15	5	VR	NA	NA	NA	NA	NA	NA	NA	NA	NA	NA	NA	NA	NA	NA	NA	NA	NA	NA	NA	NA	NA	NA
uniform	2n = 6x*	15	5	PD	NA	NA	NA	NA	NA	NA	NA	NA	NA	NA	NA	NA	NA	NA	NA	NA	NA	NA	NA	NA	NA	NA
uniform	2n = 6x*	15	5	FA	NA	NA	NA	NA	NA	NA	NA	NA	NA	NA	NA	NA	NA	NA	NA	NA	NA	NA	NA	NA	NA	NA
uniform	2n = 8x*	15	5	MM	0.304981	0.341475	0.0630429	0.150026	0.0231295	0.0478581	0.136515	0.11	0.12	0.06	0.1	0.13	0.09	0.122	0.125654	0.211769	0.0830934	0.173337	0.0683477	0.0978028	0.14284	0.203506
uniform	2n = 8x*	15	5	ML	0.358337	0.323354	0.0505901	0.101006	0.0504272	0.0388266	0.203844	0	0	0.1	0.1	0	0.1	0.49	0.0738463	0.044029	0.0690389	0.0426431	0.00261697	0.134854	-0.07537	0.159478
uniform	2n = 8x*	15	5	RI	0.402895	0.398115	0.117085	0.128189	0.0606421	0.0761755	0.0884736	0	0	0.2	0.2	0.1	0.1	0.136	0.0568311	0.0652811	0.0345257	0.0513342	-0.00870902	0.0776315	-0.0445352	0.146267
uniform	2n = 8x*	15	5	LO	0.419104	0.434348	0.129851	0.153812	0.060385	0.0831498	0.0753979	0	0	0.1	0.1	0.1	0.1	0.186	0.0660317	0.110114	0.0425271	0.0912676	-0.00331809	0.0881939	-0.00967987	0.190374
uniform	2n = 8x*	15	5	WE	0.420986	0.447589	0.122754	0.143748	0.0653199	0.0761388	0.0768843	0	0.1	0.1	0	0.2	0.2	0.182	0.0914468	0.0871298	0.0624665	0.0726336	0.0139151	0.110724	-0.0289549	0.172737
uniform	2n = 8x*	15	5	VR	NA	NA	NA	NA	NA	NA	NA	NA	NA	NA	NA	NA	NA	NA	NA	NA	NA	NA	NA	NA	NA	NA
uniform	2n = 8x*	15	5	PD	NA	NA	NA	NA	NA	NA	NA	NA	NA	NA	NA	NA	NA	NA	NA	NA	NA	NA	NA	NA	NA	NA
uniform	2n = 8x*	15	5	FA	NA	NA	NA	NA	NA	NA	NA	NA	NA	NA	NA	NA	NA	NA	NA	NA	NA	NA	NA	NA	NA	NA
uniform	2n = 2x	20	5	MM	0.00349397	0.00392541	0.00748539	0.0133507	0.00858245	0.00182644	0.09273	0.59	0.36	0.27	0.35	0.38	0.36	0.3052	0.687045	0.764265	0.549993	0.733177	0.537534	0.562213	0.716418	0.74909
uniform	2n = 2x	20	5	ML	0.0194712	0.00465259	0.014424	0.00057606	0.0196784	0.0280331	0.14163	0.85	0.39	0.24	0.38	0.38	0.46	0.6104	0.739453	0.826372	0.696076	0.813802	0.685067	0.706768	0.800808	0.82603
uniform	2n = 2x	20	5	RI	0.0155411	0.0282652	0.00259486	0.0563261	0.0247044	0.0432679	0.0867405	0.5	0.2	0	0.2	0.3	0.2	0.292	0.700799	0.803741	0.590512	0.773634	0.551095	0.6273	0.724353	0.815048
uniform	2n = 2x	20	5	LO	0.0186647	0.0628433	0.0402201	0.0711955	0.0395195	0.048765	0.0952553	0.5	0.3	0	0.3	0.3	0.3	0.3	0.679193	0.806974	0.534733	0.777816	0.494187	0.572957	0.729208	0.818615
uniform	2n = 2x	20	5	WE	0.0559713	0.00553551	0.0110781	0.105054	0.0212973	0.00860344	0.0590259	0.1	0	0	0.3	0.2	0.4	0.282	0.704093	0.803037	0.619189	0.751271	0.582913	0.653002	0.699163	0.795441
uniform	2n = 2x	20	5	VR	NA	NA	NA	NA	NA	NA	NA	NA	NA	NA	NA	NA	NA	NA	NA	NA	NA	NA	NA	NA	NA	NA
uniform	2n = 2x	20	5	PD	NA	NA	NA	NA	NA	NA	NA	NA	NA	NA	NA	NA	NA	NA	NA	NA	NA	NA	NA	NA	NA	NA
uniform	2n = 2x	20	5	FA	NA	NA	NA	NA	NA	NA	NA	NA	NA	NA	NA	NA	NA	NA	NA	NA	NA	NA	NA	NA	NA	NA
uniform	2n = 4x	20	5	MM	0.106777	0.226557	0.00820301	0.0576239	0.0245538	0.000166322	0.0979318	0.07	0.1	0.21	0.14	0.17	0.15	0.204	0.338499	0.389944	0.242455	0.340977	0.227217	0.257575	0.310984	0.370292
uniform	2n = 4x	20	5	ML	0.0846762	0.197693	0.0104419	0.0325333	0.0188911	0.0708279	0.169745	0.12	0.1	0.42	0.2	0.22	0.31	0.584	0.330121	0.407359	0.310213	0.406958	0.291004	0.329172	0.374418	0.438496
uniform	2n = 4x	20	5	RI	0.109998	0.274838	0.0206885	0.109693	0.121165	0.046847	0.102456	0.2	0	0.1	0.1	0.3	0.1	0.176	0.323647	0.364743	0.218813	0.328377	0.172344	0.26431	0.227833	0.421992
uniform	2n = 4x	20	5	LO	0.144596	0.225943	0.00993037	0.0973959	0.0870916	0.0328069	0.104814	0.2	0.1	0.5	0.2	0.3	0	0.22	0.36423	0.386127	0.25121	0.354163	0.204294	0.296974	0.253309	0.447401
uniform	2n = 4x	20	5	WE	0.1694	0.261765	0.0306483	0.130652	0.11651	0.070678	0.0871488	0.2	0	0.3	0.2	0.3	0.1	0.186	0.397219	0.393514	0.30135	0.352184	0.251468	0.349636	0.253522	0.443594
uniform	2n = 4x	20	5	VR	NA	NA	NA	NA	NA	NA	NA	NA	NA	NA	NA	NA	NA	NA	NA	NA	NA	NA	NA	NA	NA	NA
uniform	2n = 4x	20	5	PD	NA	NA	NA	NA	NA	NA	NA	NA	NA	NA	NA	NA	NA	NA	NA	NA	NA	NA	NA	NA	NA	NA
uniform	2n = 4x	20	5	FA	NA	NA	NA	NA	NA	NA	NA	NA	NA	NA	NA	NA	NA	NA	NA	NA	NA	NA	NA	NA	NA	NA
uniform	2n = 6x	20	5	MM	0.154235	0.188862	0.0195284	0.105374	0.0271167	0.00131239	0.0963255	0.18	0.2	0.13	0.14	0.19	0.15	0.1552	0.21787	0.291514	0.144444	0.243568	0.129818	0.159007	0.213243	0.273424
uniform	2n = 6x	20	5	ML	0.127894	0.174874	0.00710096	0.0583263	0.0325203	0.0680506	0.177252	0.26	0.19	0.08	0.11	0.19	0.29	0.5196	0.232728	0.321475	0.22112	0.320575	0.200712	0.241336	0.285768	0.354538
uniform	2n = 6x	20	5	RI	0.114789	0.194783	0.175391	0.158127	0.0139553	0.0418103	0.0831203	0.1	0.3	0.1	0.1	0.3	0.2	0.148	0.148538	0.30322	0.0987081	0.246695	0.051635	0.145344	0.151973	0.336927
uniform	2n = 6x	20	5	LO	0.148512	0.16006	0.214942	0.160412	0.00430589	0.0350677	0.0900504	0.1	0.2	0.2	0.2	0.1	0.1	0.194	0.190579	0.369613	0.125744	0.309195	0.079163	0.171778	0.21499	0.397699
uniform	2n = 6x	20	5	WE	0.156057	0.190018	0.188607	0.175001	0.0223108	0.0601165	0.0731197	0.2	0.2	0.3	0.2	0.1	0.1	0.196	0.215145	0.372347	0.152565	0.308739	0.102914	0.201458	0.215331	0.396548
uniform	2n = 6x	20	5	VR	NA	NA	NA	NA	NA	NA	NA	NA	NA	NA	NA	NA	NA	NA	NA	NA	NA	NA	NA	NA	NA	NA
uniform	2n = 6x	20	5	PD	NA	NA	NA	NA	NA	NA	NA	NA	NA	NA	NA	NA	NA	NA	NA	NA	NA	NA	NA	NA	NA	NA
uniform	2n = 6x	20	5	FA	NA	NA	NA	NA	NA	NA	NA	NA	NA	NA	NA	NA	NA	NA	NA	NA	NA	NA	NA	NA	NA	NA
uniform	2n = 8x	20	5	MM	0.278744	0.340797	0.106034	0.156036	0.0483677	0.0398559	0.127433	0.1	0.04	0.16	0.12	0.15	0.17	0.1368	0.141408	0.172415	0.0925316	0.140197	0.0779713	0.107052	0.109537	0.170589
uniform	2n = 8x	20	5	ML	0.318076	0.3157	0.0908661	0.0833235	0.0124001	0.0613504	0.201473	0.2	0.1	0.2	0.3	0.1	0.1	0.506	0.16725	0.112218	0.153862	0.103412	0.0895047	0.21694	-0.00867176	0.21293
uniform	2n = 8x	20	5	RI	0.425423	0.411591	0.218293	0.242711	0.10348	0.00377243	0.0905411	0.1	0.1	0.2	0.1	0.1	0	0.14	0.143337	0.0759019	0.0891576	0.05948	0.0451164	0.132853	-0.0360088	0.153893
uniform	2n = 8x	20	5	LO	0.428609	0.438928	0.18944	0.248881	0.0838642	0.00297758	0.0780147	0	0	0.2	0.1	0.4	0.2	0.19	0.150959	0.0763288	0.0988397	0.0640096	0.0524093	0.144844	-0.0382147	0.164908
uniform	2n = 8x	20	5	WE	0.448788	0.457115	0.195624	0.273763	0.0876054	0.00546706	0.0706876	0	0	0.1	0.1	0.2	0.1	0.212	0.154722	0.0919019	0.109214	0.0753263	0.0593091	0.158574	-0.0245456	0.173709
uniform	2n = 8x	20	5	VR	NA	NA	NA	NA	NA	NA	NA	NA	NA	NA	NA	NA	NA	NA	NA	NA	NA	NA	NA	NA	NA	NA
uniform	2n = 8x	20	5	PD	NA	NA	NA	NA	NA	NA	NA	NA	NA	NA	NA	NA	NA	NA	NA	NA	NA	NA	NA	NA	NA	NA
uniform	2n = 8x	20	5	FA	NA	NA	NA	NA	NA	NA	NA	NA	NA	NA	NA	NA	NA	NA	NA	NA	NA	NA	NA	NA	NA	NA
uniform	2n = 4x*	20	5	MM	0.109354	0.177514	0.00956953	0.0741865	0.0380154	0.0306489	0.0906185	0.14	0.07	0.21	0.15	0.3	0.21	0.1956	0.342049	0.406796	0.239397	0.356281	0.224439	0.254242	0.326537	0.38532
uniform	2n = 4x*	20	5	ML	0.091277	0.151304	0.0203551	0.0427907	0.0100627	0.0273743	0.166151	0.19	0.09	0.33	0.22	0.23	0.32	0.5852	0.327621	0.422365	0.305752	0.422233	0.286583	0.324675	0.390141	0.453301
uniform	2n = 4x*	20	5	RI	0.0994705	0.238821	0.0792415	0.0867687	0.0676807	0.0647465	0.080915	0.3	0.1	0.1	0	0.2	0.4	0.2	0.293798	0.460508	0.202154	0.417695	0.154474	0.248895	0.322972	0.504132
uniform	2n = 4x*	20	5	LO	0.0844053	0.212564	0.0374668	0.0902085	0.050091	0.0519127	0.0882852	0.2	0.1	0.2	0.3	0.3	0.3	0.202	0.314938	0.48102	0.212459	0.437517	0.165742	0.258223	0.344515	0.522014
uniform	2n = 4x*	20	5	WE	0.0962016	0.247262	0.0612668	0.0962414	0.0700797	0.0661381	0.0660753	0.3	0.1	0.1	0.3	0.1	0.3	0.182	0.358515	0.488834	0.27433	0.431823	0.223196	0.323959	0.340788	0.514836
uniform	2n = 4x*	20	5	VR	NA	NA	NA	NA	NA	NA	NA	NA	NA	NA	NA	NA	NA	NA	NA	NA	NA	NA	NA	NA	NA	NA
uniform	2n = 4x*	20	5	PD	NA	NA	NA	NA	NA	NA	NA	NA	NA	NA	NA	NA	NA	NA	NA	NA	NA	NA	NA	NA	NA	NA
uniform	2n = 4x*	20	5	FA	NA	NA	NA	NA	NA	NA	NA	NA	NA	NA	NA	NA	NA	NA	NA	NA	NA	NA	NA	NA	NA	NA
uniform	2n = 6x*	20	5	MM	0.165036	0.227651	0.0201254	0.0654885	0.0146115	0.0392331	0.0993524	0.17	0.11	0.15	0.21	0.17	0.11	0.1406	0.225312	0.291141	0.147829	0.241097	0.133357	0.162238	0.210922	0.270814
uniform	2n = 6x*	20	5	ML	0.147993	0.212705	0.00508647	0.0265967	0.0545089	0.0521137	0.181551	0.22	0.12	0.13	0.11	0.14	0.26	0.5148	0.246387	0.331145	0.234135	0.33108	0.213834	0.254233	0.296424	0.364864
uniform	2n = 6x*	20	5	RI	0.139928	0.382191	0.0108599	0.0117115	0.0801814	0.00397709	0.0994471	0.1	0	0.3	0.2	0.1	0.1	0.14	0.230032	0.258003	0.16346	0.219145	0.113911	0.212198	0.118574	0.315265
uniform	2n = 6x*	20	5	LO	0.0677407	0.334089	0.00977742	0.00483067	0.0430477	0.000284417	0.101778	0.1	0	0.3	0.3	0.1	0.1	0.174	0.257839	0.262891	0.182413	0.227212	0.133346	0.230587	0.125338	0.324344
uniform	2n = 6x*	20	5	WE	0.0920652	0.366086	0.0318487	0.021035	0.0260841	0.0182204	0.0797466	0.2	0.1	0.2	0.3	0.1	0	0.17	0.289615	0.264169	0.223865	0.212604	0.171508	0.274961	0.116992	0.304311
uniform	2n = 6x*	20	5	VR	NA	NA	NA	NA	NA	NA	NA	NA	NA	NA	NA	NA	NA	NA	NA	NA	NA	NA	NA	NA	NA	NA
uniform	2n = 6x*	20	5	PD	NA	NA	NA	NA	NA	NA	NA	NA	NA	NA	NA	NA	NA	NA	NA	NA	NA	NA	NA	NA	NA	NA
uniform	2n = 6x*	20	5	FA	NA	NA	NA	NA	NA	NA	NA	NA	NA	NA	NA	NA	NA	NA	NA	NA	NA	NA	NA	NA	NA	NA
uniform	2n = 8x*	20	5	MM	0.314148	0.335884	0.102112	0.135542	0.0016946	0.0241692	0.138908	0.11	0.11	0.15	0.12	0.13	0.14	0.1212	0.143603	0.163799	0.0972554	0.135534	0.0821869	0.112279	0.10427	0.166531
uniform	2n = 8x*	20	5	ML	0.391257	0.340643	0.0761151	0.071502	0.0131319	0.0391176	0.19832	0	0.1	0.2	0.1	0.1	0.2	0.506	0.0294409	0.0858968	0.0275033	0.0828579	-0.0389702	0.0937345	-0.0346428	0.198099
uniform	2n = 8x*	20	5	RI	0.485183	0.438256	0.130654	0.120569	0.0862117	0.103859	0.080402	0	0.2	0.3	0.1	0	0.1	0.158	0.0532064	0.0946076	0.0332251	0.0765865	-0.0112131	0.0775322	-0.0219924	0.17369
uniform	2n = 8x*	20	5	LO	0.472294	0.439726	0.158534	0.134506	0.0651268	0.0836294	0.0704681	0	0	0	0.1	0	0.1	0.214	0.0591498	0.118287	0.0387526	0.0997285	-0.00787885	0.085216	-0.00290258	0.200281
uniform	2n = 8x*	20	5	WE	0.459445	0.437015	0.125141	0.119689	0.0436941	0.0602286	0.0621583	0	0	0.1	0.1	0	0.1	0.182	0.0730838	0.120975	0.049461	0.101969	0.00132004	0.0973733	-0.000613879	0.202429
uniform	2n = 8x*	20	5	VR	NA	NA	NA	NA	NA	NA	NA	NA	NA	NA	NA	NA	NA	NA	NA	NA	NA	NA	NA	NA	NA	NA
uniform	2n = 8x*	20	5	PD	NA	NA	NA	NA	NA	NA	NA	NA	NA	NA	NA	NA	NA	NA	NA	NA	NA	NA	NA	NA	NA	NA
uniform	2n = 8x*	20	5	FA	NA	NA	NA	NA	NA	NA	NA	NA	NA	NA	NA	NA	NA	NA	NA	NA	NA	NA	NA	NA	NA	NA
uniform	2n = 2x	50	5	MM	0.0122166	0.00645415	0.00892126	0.00517928	0.0113325	0.0010591	0.0922785	0.71	0.42	0.54	0.47	0.47	0.51	0.451	0.820161	0.881887	0.67809	0.866516	0.668134	0.687803	0.857043	0.875403
uniform	2n = 2x	50	5	ML	0.0109505	0.00116889	0.000949139	0.00481935	0.00140231	0.0121645	0.125198	0.93	0.45	0.52	0.54	0.46	0.61	0.686	0.841909	0.917709	0.762489	0.916601	0.753899	0.770819	0.910275	0.922499
uniform	2n = 2x	50	5	RI	0.0271752	0.0093323	0.0244893	0.009827	0.00640981	0.028406	0.0840159	0.6	0.5	0.4	0.6	0.4	0.6	0.434	0.825697	0.850572	0.715763	0.844631	0.685016	0.743965	0.806327	0.87588
uniform	2n = 2x	50	5	LO	0.00777369	0.0113735	0.0314427	0.018928	0.021423	0.042992	0.0961272	0.6	0.5	0.4	0.4	0.3	0.6	0.46	0.81097	0.858505	0.647693	0.854964	0.614065	0.678973	0.818989	0.884244
uniform	2n = 2x	50	5	WE	0.0360077	0.0466506	0.00445848	0.0222017	0.021351	0.00286959	0.0655053	0.5	0.4	0.4	0.5	0.6	0.7	0.41	0.847857	0.858606	0.804794	0.83698	0.781948	0.825481	0.797879	0.869068
uniform	2n = 2x	50	5	VR	NA	NA	NA	NA	NA	NA	NA	NA	NA	NA	NA	NA	NA	NA	NA	NA	NA	NA	NA	NA	NA	NA
uniform	2n = 2x	50	5	PD	NA	NA	NA	NA	NA	NA	NA	NA	NA	NA	NA	NA	NA	NA	NA	NA	NA	NA	NA	NA	NA	NA
uniform	2n = 2x	50	5	FA	NA	NA	NA	NA	NA	NA	NA	NA	NA	NA	NA	NA	NA	NA	NA	NA	NA	NA	NA	NA	NA	NA
uniform	2n = 4x	50	5	MM	0.104916	0.216163	0.00259075	0.0545078	0.0101748	0.0291635	0.0947981	0.01	0.07	0.25	0.1	0.24	0.25	0.2442	0.372106	0.435872	0.272139	0.396019	0.256723	0.287416	0.36608	0.425139
uniform	2n = 4x	50	5	ML	0.100539	0.208398	0.0131591	0.0463598	0.00740673	0.053382	0.154486	0.01	0.08	0.32	0.19	0.23	0.41	0.6684	0.336616	0.426655	0.303879	0.423712	0.28527	0.322259	0.391862	0.454549
uniform	2n = 4x	50	5	RI	0.0884511	0.278685	0.0254158	0.0964986	0.0586059	0.0378671	0.0959629	0	0	0.5	0.2	0.6	0.4	0.234	0.358077	0.416199	0.24933	0.387735	0.201832	0.295659	0.287964	0.479179
uniform	2n = 4x	50	5	LO	0.0935038	0.251683	0.0132387	0.0814679	0.0422111	0.0482458	0.0982225	0	0	0.4	0.1	0.6	0.3	0.24	0.3626	0.443305	0.252881	0.417048	0.205276	0.299292	0.318664	0.506542
uniform	2n = 4x	50	5	WE	0.113236	0.275425	0.00284972	0.102465	0.0656787	0.0235128	0.0784909	0	0	0.3	0	0.4	0.1	0.182	0.411308	0.462088	0.321812	0.424427	0.270726	0.37109	0.328912	0.511347
uniform	2n = 4x	50	5	VR	NA	NA	NA	NA	NA	NA	NA	NA	NA	NA	NA	NA	NA	NA	NA	NA	NA	NA	NA	NA	NA	NA
uniform	2n = 4x	50	5	PD	NA	NA	NA	NA	NA	NA	NA	NA	NA	NA	NA	NA	NA	NA	NA	NA	NA	NA	NA	NA	NA	NA
uniform	2n = 4x	50	5	FA	NA	NA	NA	NA	NA	NA	NA	NA	NA	NA	NA	NA	NA	NA	NA	NA	NA	NA	NA	NA	NA	NA
uniform	2n = 6x	50	5	MM	0.134701	0.192455	0.00988962	0.0803489	0.00575115	0.00376707	0.100309	0.22	0.08	0.13	0.22	0.12	0.19	0.1456	0.243974	0.330985	0.166851	0.285796	0.151836	0.181789	0.255077	0.315938
uniform	2n = 6x	50	5	ML	0.123615	0.185916	0.00572932	0.0606185	0.0242761	0.0491888	0.16847	0.27	0.12	0.06	0.17	0.14	0.33	0.5222	0.260399	0.354539	0.245545	0.354291	0.225494	0.265388	0.32024	0.387427
uniform	2n = 6x	50	5	RI	0.15345	0.146165	0.155079	0.194402	0.00117431	0.0979779	0.0899314	0.1	0.1	0.1	0	0.2	0.3	0.164	0.187373	0.342003	0.123443	0.284478	0.0769116	0.169438	0.189318	0.374344
uniform	2n = 6x	50	5	LO	0.172693	0.141734	0.159011	0.184607	0.00790654	0.0861072	0.0869883	0.1	0.1	0.3	0.2	0.3	0.4	0.202	0.211153	0.363185	0.138385	0.302436	0.0921699	0.184006	0.208194	0.391115
uniform	2n = 6x	50	5	WE	0.165305	0.157879	0.151411	0.191865	0.0120432	0.10489	0.0669829	0	0.2	0.2	0.1	0.4	0.3	0.22	0.242811	0.368514	0.173306	0.301013	0.123554	0.22219	0.208424	0.388255
uniform	2n = 6x	50	5	VR	NA	NA	NA	NA	NA	NA	NA	NA	NA	NA	NA	NA	NA	NA	NA	NA	NA	NA	NA	NA	NA	NA
uniform	2n = 6x	50	5	PD	NA	NA	NA	NA	NA	NA	NA	NA	NA	NA	NA	NA	NA	NA	NA	NA	NA	NA	NA	NA	NA	NA
uniform	2n = 6x	50	5	FA	NA	NA	NA	NA	NA	NA	NA	NA	NA	NA	NA	NA	NA	NA	NA	NA	NA	NA	NA	NA	NA	NA
uniform	2n = 8x	50	5	MM	0.296491	0.34075	0.11764	0.140643	0.0294417	0.019532	0.125912	0.1	0.08	0.2	0.15	0.16	0.17	0.1582	0.155764	0.189125	0.108421	0.162815	0.092964	0.123826	0.130532	0.194752
uniform	2n = 8x	50	5	ML	0.240412	0.284885	0.120819	0.0590931	0.00742584	0.0442483	0.194281	0.2	0.1	0.1	0.2	0.1	0.1	0.51	0.158232	0.166776	0.149653	0.161134	0.0833428	0.214644	0.0446306	0.273313
uniform	2n = 8x	50	5	RI	0.293395	0.385865	0.251556	0.160229	0.0802819	0.0062111	0.089576	0.2	0.1	0	0.1	0.2	0.1	0.142	0.13513	0.0975227	0.086351	0.0798632	0.0410416	0.131306	-0.019855	0.178008
uniform	2n = 8x	50	5	LO	0.312462	0.402105	0.248307	0.195806	0.115173	0.0128595	0.0824187	0.1	0	0	0.2	0	0	0.19	0.140881	0.107461	0.0924771	0.0908564	0.0458891	0.138664	-0.0121006	0.191907
uniform	2n = 8x	50	5	WE	0.338509	0.405352	0.254713	0.212016	0.139286	0.0271362	0.0666975	0.1	0	0.2	0.2	0	0.2	0.184	0.151347	0.11386	0.106849	0.0954583	0.0569239	0.156241	-0.00660894	0.195557
uniform	2n = 8x	50	5	VR	NA	NA	NA	NA	NA	NA	NA	NA	NA	NA	NA	NA	NA	NA	NA	NA	NA	NA	NA	NA	NA	NA
uniform	2n = 8x	50	5	PD	NA	NA	NA	NA	NA	NA	NA	NA	NA	NA	NA	NA	NA	NA	NA	NA	NA	NA	NA	NA	NA	NA
uniform	2n = 8x	50	5	FA	NA	NA	NA	NA	NA	NA	NA	NA	NA	NA	NA	NA	NA	NA	NA	NA	NA	NA	NA	NA	NA	NA
uniform	2n = 4x*	50	5	MM	0.136596	0.175221	0.00124268	0.0829411	0.0300732	0.0401826	0.091726	0.02	0.1	0.22	0.08	0.29	0.22	0.2392	0.396523	0.460581	0.277891	0.407161	0.263107	0.292545	0.378235	0.435293
uniform	2n = 4x*	50	5	ML	0.123374	0.161507	0.0184891	0.0629054	0.00719878	0.00681914	0.152554	0.05	0.09	0.41	0.18	0.34	0.46	0.6712	0.358247	0.451047	0.318907	0.445251	0.300699	0.336882	0.414285	0.475188
uniform	2n = 4x*	50	5	RI	0.154692	0.215631	0.0564867	0.0632664	0.0528815	0.0287561	0.0913792	0	0.1	0.2	0.4	0.2	0.3	0.254	0.351709	0.451145	0.24993	0.4247	0.201375	0.297259	0.326107	0.514153
uniform	2n = 4x*	50	5	LO	0.147185	0.203457	0.0498348	0.0431969	0.0583865	0.0245508	0.0920879	0.1	0	0.2	0.5	0.2	0.5	0.296	0.376062	0.464115	0.265167	0.436318	0.217313	0.311749	0.339067	0.524343
uniform	2n = 4x*	50	5	WE	0.161929	0.231632	0.0657541	0.0586268	0.0802085	0.047059	0.0706922	0	0	0.2	0.4	0.1	0.4	0.198	0.427265	0.47178	0.348171	0.427228	0.296096	0.398183	0.332538	0.513389
uniform	2n = 4x*	50	5	VR	NA	NA	NA	NA	NA	NA	NA	NA	NA	NA	NA	NA	NA	NA	NA	NA	NA	NA	NA	NA	NA	NA
uniform	2n = 4x*	50	5	PD	NA	NA	NA	NA	NA	NA	NA	NA	NA	NA	NA	NA	NA	NA	NA	NA	NA	NA	NA	NA	NA	NA
uniform	2n = 4x*	50	5	FA	NA	NA	NA	NA	NA	NA	NA	NA	NA	NA	NA	NA	NA	NA	NA	NA	NA	NA	NA	NA	NA	NA
uniform	2n = 6x*	50	5	MM	0.183929	0.2383	0.0357924	0.0850333	0.0134245	0.0486301	0.0960174	0.12	0.11	0.12	0.31	0.13	0.12	0.1498	0.25546	0.319901	0.170476	0.274242	0.155813	0.185065	0.243433	0.304499
uniform	2n = 6x*	50	5	ML	0.170279	0.216063	0.0132912	0.0558812	0.0200709	0.0264174	0.168038	0.23	0.1	0.08	0.26	0.13	0.27	0.5354	0.278815	0.35271	0.259384	0.34895	0.239716	0.27884	0.315113	0.3819
uniform	2n = 6x*	50	5	RI	0.172127	0.27014	0.0894877	0.0225988	0.0938453	0.0130793	0.0982802	0.2	0.1	0.1	0.1	0.1	0	0.168	0.268228	0.240098	0.188178	0.207337	0.139503	0.235947	0.10445	0.305833
uniform	2n = 6x*	50	5	LO	0.133602	0.253826	0.0806386	0.00927498	0.0683385	0.00832291	0.100589	0.2	0.1	0	0.2	0.2	0.3	0.196	0.268519	0.261246	0.186779	0.226616	0.138442	0.234229	0.123917	0.324511
uniform	2n = 6x*	50	5	WE	0.138145	0.26617	0.0830858	0.0164479	0.0645772	0.0147135	0.0810489	0.1	0.1	0	0.1	0.2	0.3	0.21	0.306883	0.265325	0.233598	0.217117	0.181961	0.283949	0.119764	0.310334
uniform	2n = 6x*	50	5	VR	NA	NA	NA	NA	NA	NA	NA	NA	NA	NA	NA	NA	NA	NA	NA	NA	NA	NA	NA	NA	NA	NA
uniform	2n = 6x*	50	5	PD	NA	NA	NA	NA	NA	NA	NA	NA	NA	NA	NA	NA	NA	NA	NA	NA	NA	NA	NA	NA	NA	NA
uniform	2n = 6x*	50	5	FA	NA	NA	NA	NA	NA	NA	NA	NA	NA	NA	NA	NA	NA	NA	NA	NA	NA	NA	NA	NA	NA	NA
uniform	2n = 8x*	50	5	MM	0.312766	0.329239	0.0946678	0.127727	0.0189834	0.0262644	0.13902	0.14	0.07	0.13	0.12	0.14	0.2	0.151	0.164034	0.196201	0.116966	0.169943	0.101157	0.132715	0.137513	0.202009
uniform	2n = 8x*	50	5	ML	0.381763	0.319171	0.117435	0.0690577	0.0269992	0.0559408	0.191109	0.1	0.1	0.3	0.3	0	0.1	0.506	0.0511855	0.0604897	0.0490938	0.060248	-0.0191404	0.116873	-0.0611364	0.179876
uniform	2n = 8x*	50	5	RI	0.455988	0.422597	0.202426	0.0906008	0.132389	0.0600837	0.0885885	0	0	0	0.2	0	0	0.178	0.0673996	0.114017	0.043555	0.0902599	-0.00243572	0.0893618	-0.0061287	0.184987
uniform	2n = 8x*	50	5	LO	0.44541	0.417471	0.183891	0.0906442	0.116912	0.0700008	0.0766382	0	0	0	0.2	0	0	0.242	0.0804107	0.126995	0.0534538	0.103517	0.00613677	0.100532	0.00428436	0.200731
uniform	2n = 8x*	50	5	WE	0.445703	0.443993	0.21057	0.105783	0.106902	0.0748357	0.0715833	0	0.1	0.1	0.1	0.1	0.1	0.216	0.0980064	0.109713	0.0677209	0.0891123	0.0185812	0.116534	-0.00986192	0.186357
uniform	2n = 8x*	50	5	VR	NA	NA	NA	NA	NA	NA	NA	NA	NA	NA	NA	NA	NA	NA	NA	NA	NA	NA	NA	NA	NA	NA
uniform	2n = 8x*	50	5	PD	NA	NA	NA	NA	NA	NA	NA	NA	NA	NA	NA	NA	NA	NA	NA	NA	NA	NA	NA	NA	NA	NA
uniform	2n = 8x*	50	5	FA	NA	NA	NA	NA	NA	NA	NA	NA	NA	NA	NA	NA	NA	NA	NA	NA	NA	NA	NA	NA	NA	NA
uniform	2n = 2x	100	5	MM	0.00397968	0.00744443	0.00318183	0.0098583	0.0121087	0.0151501	0.0909741	0.9	0.7	0.66	0.7	0.6	0.67	0.5816	0.893182	0.929982	0.738248	0.921208	0.730103	0.746182	0.915326	0.926697
uniform	2n = 2x	100	5	ML	0.00865379	0.00484215	0.00343669	0.0037772	0.00318076	0.00430795	0.116882	0.98	0.74	0.66	0.72	0.61	0.73	0.7606	0.89632	0.950464	0.788955	0.949858	0.781644	0.79605	0.945974	0.953469
uniform	2n = 2x	100	5	RI	0.00989807	0.0144976	0.0097254	0.011943	0.0101309	0.00520919	0.0831633	0.9	0.6	0.9	0.6	0.7	0.7	0.566	0.897936	0.936794	0.791604	0.927293	0.768171	0.812919	0.90855	0.942311
uniform	2n = 2x	100	5	LO	0.00749355	0.00107806	0.000611157	0.0054879	0.0028915	0.0132566	0.0930779	0.9	0.7	0.7	0.7	0.6	0.8	0.62	0.892566	0.9444	0.727405	0.939951	0.700447	0.75229	0.924301	0.952445
uniform	2n = 2x	100	5	WE	0.0299833	0.0304431	0.0323563	0.0360807	0.0365792	0.0245228	0.0604551	0.8	0.6	0.4	0.5	0.5	0.5	0.494	0.899165	0.946423	0.864571	0.907387	0.84866	0.878919	0.885434	0.9253
uniform	2n = 2x	100	5	VR	NA	NA	NA	NA	NA	NA	NA	NA	NA	NA	NA	NA	NA	NA	NA	NA	NA	NA	NA	NA	NA	NA
uniform	2n = 2x	100	5	PD	NA	NA	NA	NA	NA	NA	NA	NA	NA	NA	NA	NA	NA	NA	NA	NA	NA	NA	NA	NA	NA	NA
uniform	2n = 2x	100	5	FA	NA	NA	NA	NA	NA	NA	NA	NA	NA	NA	NA	NA	NA	NA	NA	NA	NA	NA	NA	NA	NA	NA
uniform	2n = 4x	100	5	MM	0.108897	0.209419	0.00577307	0.0681053	0.00288295	0.028243	0.094329	0	0.07	0.26	0.04	0.29	0.32	0.2496	0.401217	0.468787	0.295964	0.42712	0.280594	0.311182	0.397889	0.455485
uniform	2n = 4x	100	5	ML	0.102783	0.203252	0.0177394	0.0538565	0.0027888	0.0468662	0.149984	0.02	0.1	0.39	0.11	0.34	0.43	0.7052	0.336981	0.454136	0.298257	0.446277	0.279921	0.316376	0.415466	0.476065
uniform	2n = 4x	100	5	RI	0.105299	0.237683	0.0263664	0.0867453	0.100682	0.000648966	0.10203	0	0	0.1	0	0.2	0.2	0.23	0.413618	0.46842	0.290551	0.442074	0.24353	0.336209	0.345516	0.529369
uniform	2n = 4x	100	5	LO	0.100049	0.237909	0.0292402	0.0973757	0.0739239	0.000517729	0.106233	0	0	0.1	0	0.4	0.2	0.252	0.432555	0.484459	0.300955	0.461211	0.254487	0.346037	0.3657	0.54711
uniform	2n = 4x	100	5	WE	0.116271	0.261465	0.044526	0.113951	0.097611	0.0235227	0.0878818	0	0	0.1	0	0.2	0.2	0.17	0.480975	0.493492	0.383535	0.455378	0.333721	0.431213	0.361944	0.539754
uniform	2n = 4x	100	5	VR	NA	NA	NA	NA	NA	NA	NA	NA	NA	NA	NA	NA	NA	NA	NA	NA	NA	NA	NA	NA	NA	NA
uniform	2n = 4x	100	5	PD	NA	NA	NA	NA	NA	NA	NA	NA	NA	NA	NA	NA	NA	NA	NA	NA	NA	NA	NA	NA	NA	NA
uniform	2n = 4x	100	5	FA	NA	NA	NA	NA	NA	NA	NA	NA	NA	NA	NA	NA	NA	NA	NA	NA	NA	NA	NA	NA	NA	NA
uniform	2n = 6x	100	5	MM	0.135987	0.188619	3.01962e-05	0.0945931	0.00176502	0.00424046	0.0981502	0.28	0.1	0.11	0.25	0.08	0.11	0.1282	0.251906	0.334054	0.175176	0.288708	0.159936	0.190333	0.257972	0.318861
uniform	2n = 6x	100	5	ML	0.131229	0.181049	0.00573088	0.0757285	0.0221096	0.0492579	0.164282	0.29	0.11	0.05	0.27	0.07	0.27	0.5336	0.264935	0.358744	0.2473	0.357605	0.22745	0.266944	0.323722	0.390571
uniform	2n = 6x	100	5	RI	0.172267	0.121938	0.152986	0.172073	0.000993228	0.0620593	0.08714	0	0.4	0.1	0.1	0.2	0	0.17	0.200635	0.319058	0.134194	0.267133	0.0869793	0.180807	0.170122	0.359015
uniform	2n = 6x	100	5	LO	0.185897	0.0914814	0.159259	0.173187	0.0126191	0.0601799	0.0876146	0.1	0	0.2	0	0.2	0.4	0.204	0.227978	0.340798	0.151219	0.285678	0.104532	0.197241	0.189494	0.376433
uniform	2n = 6x	100	5	WE	0.192214	0.114987	0.145362	0.190729	2.84457e-05	0.0840523	0.0718114	0.1	0.3	0.2	0	0.3	0.3	0.24	0.258131	0.34065	0.189462	0.278044	0.138522	0.239402	0.183945	0.367093
uniform	2n = 6x	100	5	VR	NA	NA	NA	NA	NA	NA	NA	NA	NA	NA	NA	NA	NA	NA	NA	NA	NA	NA	NA	NA	NA	NA
uniform	2n = 6x	100	5	PD	NA	NA	NA	NA	NA	NA	NA	NA	NA	NA	NA	NA	NA	NA	NA	NA	NA	NA	NA	NA	NA	NA
uniform	2n = 6x	100	5	FA	NA	NA	NA	NA	NA	NA	NA	NA	NA	NA	NA	NA	NA	NA	NA	NA	NA	NA	NA	NA	NA	NA
uniform	2n = 8x	100	5	MM	0.284264	0.337112	0.121634	0.132073	0.0321582	0.0154273	0.128425	0.16	0.07	0.19	0.12	0.13	0.2	0.1568	0.17	0.199799	0.119767	0.174977	0.104155	0.135321	0.142246	0.207326
uniform	2n = 8x	100	5	ML	0.264918	0.286534	0.133727	0.0585317	0.000160743	0.0457543	0.188765	0.4	0.2	0.1	0.1	0.2	0.2	0.526	0.188863	0.187758	0.179566	0.182585	0.113455	0.244094	0.0658767	0.294366
uniform	2n = 8x	100	5	RI	0.32339	0.413584	0.241811	0.167985	0.086837	0.0252444	0.0878354	0.2	0.1	0.2	0.2	0.1	0.2	0.168	0.149869	0.131469	0.094558	0.10801	0.0498689	0.138869	0.0082571	0.205635
uniform	2n = 8x	100	5	LO	0.353955	0.408136	0.243497	0.187469	0.111803	0.0282909	0.0818861	0	0	0	0.2	0.1	0.2	0.226	0.158233	0.149542	0.102096	0.1281	0.0563505	0.147414	0.0242337	0.229231
uniform	2n = 8x	100	5	WE	0.359964	0.417733	0.241885	0.20271	0.110829	0.0365484	0.0786868	0	0	0.1	0	0.1	0.2	0.23	0.160116	0.134079	0.111249	0.112682	0.0621283	0.159833	0.0105593	0.212478
uniform	2n = 8x	100	5	VR	NA	NA	NA	NA	NA	NA	NA	NA	NA	NA	NA	NA	NA	NA	NA	NA	NA	NA	NA	NA	NA	NA
uniform	2n = 8x	100	5	PD	NA	NA	NA	NA	NA	NA	NA	NA	NA	NA	NA	NA	NA	NA	NA	NA	NA	NA	NA	NA	NA	NA
uniform	2n = 8x	100	5	FA	NA	NA	NA	NA	NA	NA	NA	NA	NA	NA	NA	NA	NA	NA	NA	NA	NA	NA	NA	NA	NA	NA
uniform	2n = 4x*	100	5	MM	0.121115	0.192336	0.00241005	0.0885729	0.0225429	0.018516	0.0925504	0.02	0.13	0.25	0.02	0.35	0.33	0.2584	0.426771	0.485568	0.296724	0.433674	0.282168	0.311143	0.405158	0.461346
uniform	2n = 4x*	100	5	ML	0.10903	0.180391	0.0180526	0.069768	0.00890176	0.00297288	0.147394	0.03	0.1	0.39	0.08	0.42	0.49	0.7162	0.364671	0.468908	0.317323	0.458716	0.299479	0.334945	0.428462	0.487943
uniform	2n = 4x*	100	5	RI	0.151603	0.239295	0.0398653	0.127956	0.0218985	0.0586616	0.0886427	0	0.1	0.2	0	0.4	0.2	0.272	0.405887	0.490378	0.291163	0.444112	0.243139	0.337763	0.350642	0.528822
uniform	2n = 4x*	100	5	LO	0.148793	0.219774	0.0429243	0.118831	0.0151762	0.0591186	0.0927377	0	0.1	0.2	0	0.6	0.2	0.28	0.435762	0.48973	0.30781	0.449597	0.260895	0.353274	0.355442	0.53472
uniform	2n = 4x*	100	5	WE	0.162515	0.243855	0.0584646	0.131188	0.0342541	0.0768317	0.0695515	0	0.1	0.2	0	0.5	0.1	0.156	0.491061	0.48976	0.399529	0.434305	0.349617	0.447179	0.341893	0.518397
uniform	2n = 4x*	100	5	VR	NA	NA	NA	NA	NA	NA	NA	NA	NA	NA	NA	NA	NA	NA	NA	NA	NA	NA	NA	NA	NA	NA
uniform	2n = 4x*	100	5	PD	NA	NA	NA	NA	NA	NA	NA	NA	NA	NA	NA	NA	NA	NA	NA	NA	NA	NA	NA	NA	NA	NA
uniform	2n = 4x*	100	5	FA	NA	NA	NA	NA	NA	NA	NA	NA	NA	NA	NA	NA	NA	NA	NA	NA	NA	NA	NA	NA	NA	NA
uniform	2n = 6x*	100	5	MM	0.185586	0.237661	0.0256663	0.0716643	0.008845	0.0572685	0.0956415	0.19	0.06	0.08	0.26	0.14	0.09	0.117	0.275949	0.341854	0.189528	0.296207	0.174519	0.204449	0.265428	0.326384
uniform	2n = 6x*	100	5	ML	0.166429	0.22201	0.00905011	0.0548302	0.0216901	0.0152701	0.164285	0.23	0.06	0.07	0.21	0.12	0.31	0.543	0.300163	0.379749	0.274287	0.373457	0.2551	0.293258	0.340485	0.405512
uniform	2n = 6x*	100	5	RI	0.161545	0.260637	0.0865842	0.0264172	0.035621	0.0175878	0.0980978	0.4	0	0.2	0.2	0	0.2	0.192	0.256	0.29552	0.178892	0.263592	0.130215	0.226709	0.159536	0.361854
uniform	2n = 6x*	100	5	LO	0.148633	0.257334	0.0749351	0.015196	0.050519	0.0141083	0.100248	0.2	0.1	0	0.2	0.2	0.3	0.21	0.243252	0.296777	0.169161	0.266929	0.120594	0.216919	0.162244	0.365673
uniform	2n = 6x*	100	5	WE	0.15519	0.277753	0.082158	0.0253246	0.0433748	0.024824	0.0860698	0	0.1	0.1	0.2	0.2	0.4	0.262	0.280694	0.311437	0.216108	0.266366	0.163491	0.267499	0.166618	0.360718
uniform	2n = 6x*	100	5	VR	NA	NA	NA	NA	NA	NA	NA	NA	NA	NA	NA	NA	NA	NA	NA	NA	NA	NA	NA	NA	NA	NA
uniform	2n = 6x*	100	5	PD	NA	NA	NA	NA	NA	NA	NA	NA	NA	NA	NA	NA	NA	NA	NA	NA	NA	NA	NA	NA	NA	NA
uniform	2n = 6x*	100	5	FA	NA	NA	NA	NA	NA	NA	NA	NA	NA	NA	NA	NA	NA	NA	NA	NA	NA	NA	NA	NA	NA	NA
uniform	2n = 8x*	100	5	MM	0.314074	0.325371	0.099652	0.129979	0.0140169	0.0344187	0.138405	0.08	0.09	0.11	0.19	0.16	0.14	0.1516	0.164691	0.201125	0.119533	0.178137	0.103442	0.135562	0.145037	0.210839
uniform	2n = 8x*	100	5	ML	0.341293	0.324885	0.11701	0.0685442	0.011746	0.0479511	0.190644	0	0	0.1	0.2	0.1	0.1	0.504	0.0595031	0.07795	0.0571718	0.0778247	-0.0111627	0.124975	-0.0438162	0.197192
uniform	2n = 8x*	100	5	RI	0.390706	0.406628	0.162403	0.0914116	0.0634409	0.0685196	0.0882594	0	0	0	0	0.1	0	0.2	0.0665381	0.10651	0.0441557	0.0869863	-0.00306908	0.0911839	-0.0124934	0.184761
uniform	2n = 8x*	100	5	LO	0.395953	0.406333	0.177612	0.0995439	0.0676407	0.0800561	0.0763258	0	0	0.1	0.1	0.1	0	0.286	0.0737326	0.114027	0.0496192	0.0937251	0.0017154	0.0972958	-0.00642888	0.192017
uniform	2n = 8x*	100	5	WE	0.420537	0.419298	0.194198	0.104524	0.0975065	0.0903189	0.0691283	0	0	0.1	0.1	0.1	0.1	0.3	0.0865231	0.108391	0.0623415	0.0859664	0.0110962	0.11326	-0.0107419	0.181081
uniform	2n = 8x*	100	5	VR	NA	NA	NA	NA	NA	NA	NA	NA	NA	NA	NA	NA	NA	NA	NA	NA	NA	NA	NA	NA	NA	NA
uniform	2n = 8x*	100	5	PD	NA	NA	NA	NA	NA	NA	NA	NA	NA	NA	NA	NA	NA	NA	NA	NA	NA	NA	NA	NA	NA	NA
uniform	2n = 8x*	100	5	FA	NA	NA	NA	NA	NA	NA	NA	NA	NA	NA	NA	NA	NA	NA	NA	NA	NA	NA	NA	NA	NA	NA
uniform	2n = 2x	500	5	MM	0.00294042	0.00598228	0.0056219	0.00770379	0.00692775	0.0075708	0.0904689	1	0.95	0.96	0.99	0.94	0.95	0.8378	0.956757	0.977513	0.778761	0.968176	0.772327	0.785035	0.965759	0.970425
uniform	2n = 2x	500	5	ML	0.00301779	0.00440696	0.00543975	0.00690476	0.00534204	0.00397466	0.107297	1	0.96	0.97	0.98	0.98	0.98	0.8886	0.934913	0.984469	0.788969	0.980835	0.782303	0.795454	0.979339	0.982224
uniform	2n = 2x	500	5	RI	0.0127319	0.00885788	0.0157295	0.0123816	0.0186418	0.00814068	0.0878326	0.9	1	1	1	1	1	0.83	0.966891	0.986168	0.827949	0.97494	0.810607	0.84384	0.96858	0.980025
uniform	2n = 2x	500	5	LO	0.00640254	0.0155136	0.00200262	0.00311642	0.00189761	0.00702924	0.0983506	1	0.9	1	1	1	1	0.848	0.955448	0.98584	0.74854	0.982627	0.72603	0.769447	0.977968	0.986307
uniform	2n = 2x	500	5	WE	0.0300776	0.0253583	0.039516	0.0341061	0.0392939	0.0311094	0.0653053	0.9	0.7	0.8	0.8	0.8	0.9	0.666	0.979985	0.987467	0.955556	0.959981	0.95039	0.960194	0.950926	0.967394
uniform	2n = 2x	500	5	VR	NA	NA	NA	NA	NA	NA	NA	NA	NA	NA	NA	NA	NA	NA	NA	NA	NA	NA	NA	NA	NA	NA
uniform	2n = 2x	500	5	PD	NA	NA	NA	NA	NA	NA	NA	NA	NA	NA	NA	NA	NA	NA	NA	NA	NA	NA	NA	NA	NA	NA
uniform	2n = 2x	500	5	FA	NA	NA	NA	NA	NA	NA	NA	NA	NA	NA	NA	NA	NA	NA	NA	NA	NA	NA	NA	NA	NA	NA
uniform	2n = 4x	500	5	MM	0.111986	0.212462	0.00335396	0.0662926	0.00597604	0.0229465	0.0943721	0	0.06	0.14	0	0.17	0.15	0.1628	0.425562	0.48208	0.310727	0.439299	0.295617	0.325682	0.410385	0.46733
uniform	2n = 4x	500	5	ML	0.107467	0.210976	0.0109941	0.059736	0.00337312	0.0361117	0.146597	0	0.06	0.23	0.02	0.2	0.34	0.7184	0.33722	0.453197	0.293324	0.441064	0.275229	0.311211	0.410362	0.470768
uniform	2n = 4x	500	5	RI	0.107628	0.255635	0.0142178	0.0972348	0.0729832	0.0002125	0.100352	0	0	0	0	0.2	0.3	0.166	0.405911	0.460441	0.280246	0.436187	0.233621	0.325584	0.338438	0.524622
uniform	2n = 4x	500	5	LO	0.102813	0.243526	0.00734784	0.0881692	0.0676604	0.00371734	0.101834	0	0	0.1	0	0.2	0.4	0.16	0.436346	0.473861	0.299631	0.45164	0.253635	0.344274	0.354764	0.538921
uniform	2n = 4x	500	5	WE	0.118295	0.26691	0.023426	0.107601	0.0864965	0.0190681	0.0831794	0	0	0.1	0	0.1	0.1	0.024	0.493159	0.485469	0.3884	0.448436	0.339219	0.435464	0.354022	0.533803
uniform	2n = 4x	500	5	VR	NA	NA	NA	NA	NA	NA	NA	NA	NA	NA	NA	NA	NA	NA	NA	NA	NA	NA	NA	NA	NA	NA
uniform	2n = 4x	500	5	PD	NA	NA	NA	NA	NA	NA	NA	NA	NA	NA	NA	NA	NA	NA	NA	NA	NA	NA	NA	NA	NA	NA
uniform	2n = 4x	500	5	FA	NA	NA	NA	NA	NA	NA	NA	NA	NA	NA	NA	NA	NA	NA	NA	NA	NA	NA	NA	NA	NA	NA
uniform	2n = 6x	500	5	MM	0.135596	0.187621	0.00778566	0.0933889	0.00967233	0.00695625	0.0988306	0.22	0.07	0	0.3	0.04	0.11	0.0826	0.259599	0.343824	0.180728	0.299601	0.165482	0.195886	0.268778	0.329811
uniform	2n = 6x	500	5	ML	0.128701	0.179797	0.00189725	0.08113	0.0143993	0.0474661	0.15915	0.24	0.07	0.01	0.28	0.08	0.29	0.5514	0.278236	0.369163	0.256502	0.366499	0.236973	0.275825	0.332996	0.399078
uniform	2n = 6x	500	5	RI	0.159374	0.0995796	0.13287	0.171449	0.0311276	0.0712197	0.0861184	0	0.2	0.1	0	0.4	0.3	0.196	0.214411	0.358722	0.143944	0.304829	0.0966149	0.190623	0.208043	0.395704
uniform	2n = 6x	500	5	LO	0.182026	0.0933976	0.155469	0.179769	0.0213194	0.0660177	0.0869059	0.1	0.2	0.2	0	0.4	0.3	0.228	0.227567	0.368551	0.151302	0.31401	0.10446	0.197474	0.21758	0.40437
uniform	2n = 6x	500	5	WE	0.181625	0.11192	0.146295	0.191927	0.0306663	0.0879235	0.0691007	0.1	0.2	0.4	0	0.4	0.5	0.334	0.262156	0.371738	0.194755	0.309269	0.143214	0.245243	0.214752	0.398046
uniform	2n = 6x	500	5	VR	NA	NA	NA	NA	NA	NA	NA	NA	NA	NA	NA	NA	NA	NA	NA	NA	NA	NA	NA	NA	NA	NA
uniform	2n = 6x	500	5	PD	NA	NA	NA	NA	NA	NA	NA	NA	NA	NA	NA	NA	NA	NA	NA	NA	NA	NA	NA	NA	NA	NA
uniform	2n = 6x	500	5	FA	NA	NA	NA	NA	NA	NA	NA	NA	NA	NA	NA	NA	NA	NA	NA	NA	NA	NA	NA	NA	NA	NA
uniform	2n = 8x	500	5	MM	0.286463	0.339269	0.122655	0.126878	0.0333304	0.0238245	0.128124	0.1	0.03	0.18	0.05	0.09	0.23	0.1574	0.173853	0.206468	0.124399	0.182341	0.108556	0.140178	0.149405	0.214873
uniform	2n = 8x	500	5	ML	0.263721	0.307202	0.151028	0.060282	0.0114668	0.0405162	0.187106	0.2	0.1	0	0.2	0	0.3	0.528	0.188443	0.189317	0.180326	0.185947	0.113762	0.245278	0.0681615	0.298621
uniform	2n = 8x	500	5	RI	0.335592	0.395585	0.258831	0.163551	0.110935	0.0103103	0.0915378	0.1	0	0.2	0.1	0.1	0.3	0.216	0.148491	0.139705	0.0951961	0.115189	0.0497745	0.140225	0.015143	0.212951
uniform	2n = 8x	500	5	LO	0.357425	0.411204	0.257258	0.175196	0.120066	0.0171238	0.0836346	0.1	0	0.3	0.3	0	0.3	0.272	0.153484	0.137647	0.100091	0.118081	0.0538258	0.145927	0.0138907	0.219734
uniform	2n = 8x	500	5	WE	0.360703	0.41733	0.253525	0.182405	0.122697	0.0236857	0.0823112	0.1	0	0.3	0.3	0.1	0.3	0.296	0.167425	0.130133	0.118375	0.107725	0.0684165	0.167741	0.00702031	0.206267
uniform	2n = 8x	500	5	VR	NA	NA	NA	NA	NA	NA	NA	NA	NA	NA	NA	NA	NA	NA	NA	NA	NA	NA	NA	NA	NA	NA
uniform	2n = 8x	500	5	PD	NA	NA	NA	NA	NA	NA	NA	NA	NA	NA	NA	NA	NA	NA	NA	NA	NA	NA	NA	NA	NA	NA
uniform	2n = 8x	500	5	FA	NA	NA	NA	NA	NA	NA	NA	NA	NA	NA	NA	NA	NA	NA	NA	NA	NA	NA	NA	NA	NA	NA
uniform	2n = 4x*	500	5	MM	0.121864	0.180938	0.00419104	0.0848675	0.0309294	0.0271292	0.0918518	0	0.09	0.09	0	0.14	0.18	0.166	0.443213	0.503965	0.309929	0.448099	0.295389	0.324325	0.420085	0.475259
uniform	2n = 4x*	500	5	ML	0.117473	0.176547	0.00579189	0.0741719	0.0214668	0.00771001	0.144024	0	0.06	0.18	0	0.29	0.41	0.7282	0.352714	0.471073	0.301785	0.454723	0.284049	0.319315	0.424718	0.48373
uniform	2n = 4x*	500	5	RI	0.154013	0.215403	0.0503875	0.104517	0.034071	0.0329403	0.0887434	0	0.1	0	0	0.3	0.3	0.184	0.42518	0.504073	0.306827	0.461687	0.258862	0.353282	0.368662	0.545557
uniform	2n = 4x*	500	5	LO	0.149614	0.203506	0.0453945	0.0982429	0.0277937	0.0248661	0.0914881	0	0.1	0	0	0.4	0.4	0.192	0.446727	0.515786	0.318673	0.47919	0.271518	0.364303	0.38668	0.562153
uniform	2n = 4x*	500	5	WE	0.161144	0.227377	0.0631291	0.110871	0.0462111	0.0443817	0.071418	0	0.1	0	0	0	0.1	0.036	0.505172	0.519577	0.422055	0.460289	0.371684	0.469949	0.370087	0.541893
uniform	2n = 4x*	500	5	VR	NA	NA	NA	NA	NA	NA	NA	NA	NA	NA	NA	NA	NA	NA	NA	NA	NA	NA	NA	NA	NA	NA
uniform	2n = 4x*	500	5	PD	NA	NA	NA	NA	NA	NA	NA	NA	NA	NA	NA	NA	NA	NA	NA	NA	NA	NA	NA	NA	NA	NA
uniform	2n = 4x*	500	5	FA	NA	NA	NA	NA	NA	NA	NA	NA	NA	NA	NA	NA	NA	NA	NA	NA	NA	NA	NA	NA	NA	NA
uniform	2n = 6x*	500	5	MM	0.183588	0.234006	0.0207915	0.076099	0.0090111	0.0518487	0.0967383	0.13	0.04	0	0.32	0.03	0.06	0.0776	0.280652	0.356006	0.191045	0.309274	0.176154	0.205849	0.278635	0.339285
uniform	2n = 6x*	500	5	ML	0.174771	0.221777	0.00741604	0.0618117	0.0178838	0.01658	0.160352	0.17	0.05	0.01	0.27	0.04	0.27	0.5506	0.311551	0.392908	0.278713	0.383387	0.259954	0.297262	0.350962	0.414893
uniform	2n = 6x*	500	5	RI	0.18791	0.284473	0.0875648	0.0320324	0.0399028	0.00733576	0.0962429	0.3	0	0.1	0.2	0.1	0.3	0.24	0.259024	0.317418	0.181954	0.279215	0.133003	0.23002	0.177144	0.375343
uniform	2n = 6x*	500	5	LO	0.163937	0.265939	0.0639042	0.0179061	0.0537044	0.00944212	0.0999584	0.1	0	0.3	0.2	0.2	0.4	0.264	0.26116	0.314599	0.181338	0.278446	0.132909	0.228904	0.175809	0.375094
uniform	2n = 6x*	500	5	WE	0.173572	0.285032	0.0737728	0.0281274	0.0456693	0.000820713	0.0823202	0	0	0.3	0.1	0.2	0.5	0.348	0.301489	0.326864	0.233299	0.276294	0.180637	0.284627	0.178002	0.369126
uniform	2n = 6x*	500	5	VR	NA	NA	NA	NA	NA	NA	NA	NA	NA	NA	NA	NA	NA	NA	NA	NA	NA	NA	NA	NA	NA	NA
uniform	2n = 6x*	500	5	PD	NA	NA	NA	NA	NA	NA	NA	NA	NA	NA	NA	NA	NA	NA	NA	NA	NA	NA	NA	NA	NA	NA
uniform	2n = 6x*	500	5	FA	NA	NA	NA	NA	NA	NA	NA	NA	NA	NA	NA	NA	NA	NA	NA	NA	NA	NA	NA	NA	NA	NA
uniform	2n = 8x*	500	5	MM	0.324697	0.3256	0.0952647	0.139588	0.00430921	0.0321259	0.139078	0.07	0.07	0.1	0.11	0.14	0.24	0.1394	0.169343	0.19739	0.124811	0.176241	0.108484	0.14107	0.142834	0.209248
uniform	2n = 8x*	500	5	ML	0.365905	0.33254	0.114132	0.0736772	0.0102532	0.0204408	0.18523	0.1	0	0.1	0.2	0.1	0.2	0.5	0.0539843	0.0529335	0.0523012	0.0527256	-0.0166193	0.120727	-0.0686611	0.172574
uniform	2n = 8x*	500	5	RI	0.419022	0.416274	0.164982	0.111604	0.0898247	0.110075	0.0882709	0	0	0.1	0.1	0.1	0.1	0.262	0.0668264	0.095939	0.0444086	0.0788423	-0.00288449	0.0915035	-0.0213169	0.177435
uniform	2n = 8x*	500	5	LO	0.422094	0.415623	0.177768	0.104924	0.088146	0.105304	0.0764287	0	0	0	0	0	0.1	0.31	0.0717543	0.108878	0.0484554	0.0899422	0.00038497	0.0963024	-0.0107421	0.188821
uniform	2n = 8x*	500	5	WE	0.449105	0.42865	0.198638	0.117101	0.110183	0.112505	0.0704833	0	0	0.1	0.1	0	0.1	0.35	0.0871579	0.103194	0.061561	0.0824341	0.0113161	0.111496	-0.0149862	0.178304
uniform	2n = 8x*	500	5	VR	NA	NA	NA	NA	NA	NA	NA	NA	NA	NA	NA	NA	NA	NA	NA	NA	NA	NA	NA	NA	NA	NA
uniform	2n = 8x*	500	5	PD	NA	NA	NA	NA	NA	NA	NA	NA	NA	NA	NA	NA	NA	NA	NA	NA	NA	NA	NA	NA	NA	NA
uniform	2n = 8x*	500	5	FA	NA	NA	NA	NA	NA	NA	NA	NA	NA	NA	NA	NA	NA	NA	NA	NA	NA	NA	NA	NA	NA	NA
uniform	2n = 2x	1000	5	MM	0.00348378	0.00398599	0.00942154	0.00768886	0.00836947	0.00575382	0.0913029	1	1	0.98	1	0.99	1	0.8784	0.968197	0.983186	0.790765	0.97391	0.784762	0.79662	0.971939	0.975744
uniform	2n = 2x	1000	5	ML	0.00177067	0.00203857	0.00909247	0.00683298	0.00731879	0.00198104	0.105542	1	1	1	1	0.99	1	0.8972	0.943341	0.98839	0.79505	0.983778	0.788646	0.801282	0.982525	0.984942
uniform	2n = 2x	1000	5	RI	0.0217508	0.00228121	0.00735178	0.0219368	0.0156981	0.015624	0.0882589	1	1	1	1	1	1	0.87	0.976374	0.991948	0.835253	0.982581	0.819041	0.850131	0.978257	0.98605
uniform	2n = 2x	1000	5	LO	0.00381198	0.0140083	0.00627535	0.00392259	0.00145183	0.00414714	0.0987903	1	1	1	1	1	1	0.882	0.964213	0.993374	0.757065	0.990884	0.73551	0.777089	0.988457	0.992802
uniform	2n = 2x	1000	5	WE	0.0327255	0.0240452	0.030814	0.0426386	0.0364956	0.0442731	0.0658988	0.8	1	0.8	0.6	0.8	0.6	0.74	0.984539	0.99431	0.961244	0.965372	0.956763	0.965269	0.958154	0.971362
uniform	2n = 2x	1000	5	VR	NA	NA	NA	NA	NA	NA	NA	NA	NA	NA	NA	NA	NA	NA	NA	NA	NA	NA	NA	NA	NA	NA
uniform	2n = 2x	1000	5	PD	NA	NA	NA	NA	NA	NA	NA	NA	NA	NA	NA	NA	NA	NA	NA	NA	NA	NA	NA	NA	NA	NA
uniform	2n = 2x	1000	5	FA	NA	NA	NA	NA	NA	NA	NA	NA	NA	NA	NA	NA	NA	NA	NA	NA	NA	NA	NA	NA	NA	NA
uniform	2n = 4x	1000	5	MM	0.110058	0.213077	0.00196523	0.0683721	0.00270774	0.0222953	0.0943894	0	0.08	0.06	0	0.14	0.07	0.1218	0.43004	0.491363	0.313945	0.44653	0.298865	0.328869	0.417905	0.474269
uniform	2n = 4x	1000	5	ML	0.106469	0.211891	0.00728886	0.0616956	0.00186992	0.032659	0.146207	0	0.07	0.08	0	0.17	0.3	0.7184	0.33783	0.45878	0.293508	0.445764	0.275434	0.311374	0.415263	0.475264
uniform	2n = 4x	1000	5	RI	0.0983294	0.245748	0.0155721	0.101238	0.0697928	0.00263032	0.100871	0	0	0.1	0	0.1	0.2	0.12	0.421559	0.469757	0.295722	0.445063	0.24878	0.341279	0.348106	0.532599
uniform	2n = 4x	1000	5	LO	0.101551	0.23359	0.0101359	0.0948676	0.0652478	0.00308776	0.102691	0	0	0.1	0	0.3	0.2	0.138	0.449418	0.482148	0.312441	0.460099	0.266259	0.357192	0.36388	0.546602
uniform	2n = 4x	1000	5	WE	0.11616	0.255836	0.0248254	0.112859	0.0845256	0.0257478	0.0834713	0	0	0	0	0	0	0.006	0.503913	0.49176	0.401294	0.45373	0.352191	0.448193	0.359847	0.538517
uniform	2n = 4x	1000	5	VR	NA	NA	NA	NA	NA	NA	NA	NA	NA	NA	NA	NA	NA	NA	NA	NA	NA	NA	NA	NA	NA	NA
uniform	2n = 4x	1000	5	PD	NA	NA	NA	NA	NA	NA	NA	NA	NA	NA	NA	NA	NA	NA	NA	NA	NA	NA	NA	NA	NA	NA
uniform	2n = 4x	1000	5	FA	NA	NA	NA	NA	NA	NA	NA	NA	NA	NA	NA	NA	NA	NA	NA	NA	NA	NA	NA	NA	NA	NA
uniform	2n = 6x	1000	5	MM	0.134015	0.188246	0.00800544	0.0972774	0.00744312	0.00331315	0.0983336	0.2	0.05	0	0.34	0.01	0.03	0.0642	0.260599	0.349272	0.181365	0.303979	0.166124	0.196519	0.273283	0.334057
uniform	2n = 6x	1000	5	ML	0.127086	0.181105	0.000142282	0.0846824	0.0151251	0.0486538	0.158934	0.27	0.07	0	0.3	0.08	0.24	0.5516	0.278777	0.376858	0.256127	0.374186	0.236657	0.275392	0.340887	0.406547
uniform	2n = 6x	1000	5	RI	0.141849	0.119956	0.141469	0.165508	0.0158388	0.0659439	0.086066	0.2	0.2	0.2	0.2	0.3	0.3	0.21	0.216591	0.351301	0.145282	0.299815	0.0979987	0.191911	0.202423	0.391335
uniform	2n = 6x	1000	5	LO	0.164204	0.107607	0.158572	0.169866	0.00783268	0.0674604	0.0870895	0.1	0.1	0.3	0	0.4	0.4	0.224	0.228744	0.358255	0.151853	0.306195	0.105077	0.197958	0.209122	0.397292
uniform	2n = 6x	1000	5	WE	0.16497	0.126167	0.147979	0.182071	0.0167018	0.0877681	0.0687696	0	0.3	0.4	0	0.4	0.5	0.354	0.266501	0.361377	0.19843	0.301193	0.146821	0.248961	0.206131	0.390623
uniform	2n = 6x	1000	5	VR	NA	NA	NA	NA	NA	NA	NA	NA	NA	NA	NA	NA	NA	NA	NA	NA	NA	NA	NA	NA	NA	NA
uniform	2n = 6x	1000	5	PD	NA	NA	NA	NA	NA	NA	NA	NA	NA	NA	NA	NA	NA	NA	NA	NA	NA	NA	NA	NA	NA	NA
uniform	2n = 6x	1000	5	FA	NA	NA	NA	NA	NA	NA	NA	NA	NA	NA	NA	NA	NA	NA	NA	NA	NA	NA	NA	NA	NA	NA
uniform	2n = 8x	1000	5	MM	0.286556	0.339902	0.12026	0.129549	0.0320611	0.0246098	0.128044	0.08	0.04	0.16	0.07	0.1	0.23	0.149	0.17511	0.204037	0.125953	0.180563	0.110033	0.141808	0.147533	0.213191
uniform	2n = 8x	1000	5	ML	0.268285	0.303972	0.138585	0.0455621	0.00576196	0.0434409	0.185319	0.2	0.1	0.1	0.2	0.1	0.4	0.548	0.171945	0.188434	0.165196	0.185287	0.0980582	0.230838	0.0673409	0.298126
uniform	2n = 8x	1000	5	RI	0.336038	0.400269	0.249625	0.155019	0.111645	0.0128685	0.0891302	0.1	0	0.2	0.1	0	0.4	0.242	0.144723	0.144048	0.0930021	0.118045	0.0474557	0.138163	0.0186559	0.215125
uniform	2n = 8x	1000	5	LO	0.352451	0.410494	0.243657	0.169961	0.117922	0.016017	0.08224	0	0	0.3	0.3	0	0.4	0.284	0.148614	0.145868	0.0969994	0.124224	0.0506784	0.142904	0.0208736	0.224948
uniform	2n = 8x	1000	5	WE	0.358205	0.418039	0.243683	0.17854	0.119395	0.0203151	0.0773376	0.1	0	0.3	0.3	0	0.4	0.318	0.159803	0.139458	0.112956	0.115314	0.0629708	0.162375	0.0148107	0.21351
uniform	2n = 8x	1000	5	VR	NA	NA	NA	NA	NA	NA	NA	NA	NA	NA	NA	NA	NA	NA	NA	NA	NA	NA	NA	NA	NA	NA
uniform	2n = 8x	1000	5	PD	NA	NA	NA	NA	NA	NA	NA	NA	NA	NA	NA	NA	NA	NA	NA	NA	NA	NA	NA	NA	NA	NA
uniform	2n = 8x	1000	5	FA	NA	NA	NA	NA	NA	NA	NA	NA	NA	NA	NA	NA	NA	NA	NA	NA	NA	NA	NA	NA	NA	NA
uniform	2n = 4x*	1000	5	MM	0.123314	0.17882	0.0023376	0.0843936	0.0290556	0.0251254	0.0918774	0.01	0.08	0.03	0	0.08	0.08	0.1264	0.452515	0.508871	0.317052	0.45171	0.302547	0.33141	0.423845	0.47872
uniform	2n = 4x*	1000	5	ML	0.118394	0.17558	0.00727495	0.0761439	0.0199075	0.00850567	0.143608	0	0.09	0.12	0	0.17	0.37	0.7282	0.353804	0.475681	0.302311	0.458702	0.284603	0.319813	0.42886	0.487545
uniform	2n = 4x*	1000	5	RI	0.155067	0.210574	0.0377605	0.109654	0.0339286	0.0341806	0.0879836	0	0.1	0	0	0.1	0.2	0.122	0.430816	0.504762	0.309534	0.461724	0.261821	0.355738	0.36879	0.545518
uniform	2n = 4x*	1000	5	LO	0.141505	0.195825	0.0278993	0.100257	0.0261451	0.0233854	0.0901124	0	0.1	0.1	0	0.3	0.3	0.142	0.447923	0.515182	0.31809	0.477277	0.271105	0.363564	0.384814	0.560255
uniform	2n = 4x*	1000	5	WE	0.154131	0.218631	0.0464805	0.113867	0.0455652	0.0437895	0.0689515	0	0.1	0	0	0	0	0.006	0.50693	0.522521	0.422097	0.464217	0.371859	0.469869	0.374121	0.545632
uniform	2n = 4x*	1000	5	VR	NA	NA	NA	NA	NA	NA	NA	NA	NA	NA	NA	NA	NA	NA	NA	NA	NA	NA	NA	NA	NA	NA
uniform	2n = 4x*	1000	5	PD	NA	NA	NA	NA	NA	NA	NA	NA	NA	NA	NA	NA	NA	NA	NA	NA	NA	NA	NA	NA	NA	NA
uniform	2n = 4x*	1000	5	FA	NA	NA	NA	NA	NA	NA	NA	NA	NA	NA	NA	NA	NA	NA	NA	NA	NA	NA	NA	NA	NA	NA
uniform	2n = 6x*	1000	5	MM	0.182645	0.234691	0.024538	0.0738617	0.00895374	0.0507904	0.0970418	0.16	0.05	0.02	0.33	0.04	0.04	0.0536	0.284723	0.356128	0.194376	0.30926	0.179457	0.209205	0.278625	0.339267
uniform	2n = 6x*	1000	5	ML	0.174026	0.222702	0.0124693	0.0610341	0.015758	0.0181435	0.159935	0.16	0.05	0.02	0.33	0.05	0.28	0.55	0.315083	0.390227	0.280766	0.379707	0.262098	0.299223	0.347275	0.411232
uniform	2n = 6x*	1000	5	RI	0.185043	0.292017	0.0773343	0.0293706	0.0496495	0.0184138	0.099603	0.2	0	0.2	0.3	0.2	0.3	0.234	0.265824	0.314336	0.186505	0.277749	0.137652	0.234454	0.17517	0.374363
uniform	2n = 6x*	1000	5	LO	0.154722	0.275747	0.0598704	0.0201072	0.0592773	0.01398	0.100792	0	0	0.2	0.2	0.3	0.4	0.24	0.260838	0.319674	0.180984	0.283813	0.132573	0.228535	0.18109	0.380411
uniform	2n = 6x*	1000	5	WE	0.164671	0.29493	0.0711078	0.032168	0.0493952	0.00198528	0.0840789	0	0.1	0.3	0.2	0.2	0.5	0.348	0.300071	0.330839	0.232117	0.279782	0.179424	0.283481	0.181566	0.372471
uniform	2n = 6x*	1000	5	VR	NA	NA	NA	NA	NA	NA	NA	NA	NA	NA	NA	NA	NA	NA	NA	NA	NA	NA	NA	NA	NA	NA
uniform	2n = 6x*	1000	5	PD	NA	NA	NA	NA	NA	NA	NA	NA	NA	NA	NA	NA	NA	NA	NA	NA	NA	NA	NA	NA	NA	NA
uniform	2n = 6x*	1000	5	FA	NA	NA	NA	NA	NA	NA	NA	NA	NA	NA	NA	NA	NA	NA	NA	NA	NA	NA	NA	NA	NA	NA
uniform	2n = 8x*	1000	5	MM	0.32008	0.325522	0.0996536	0.14227	0.00714153	0.0273265	0.139084	0.04	0.09	0.12	0.12	0.17	0.22	0.1374	0.172623	0.197604	0.126936	0.176968	0.110654	0.143149	0.143466	0.210065
uniform	2n = 8x*	1000	5	ML	0.364324	0.337944	0.108462	0.0766199	0.00429913	0.0311663	0.187171	0.1	0	0.1	0.2	0.1	0.1	0.492	0.0534833	0.0398762	0.0518633	0.0397605	-0.0171213	0.120356	-0.0817045	0.160062
uniform	2n = 8x*	1000	5	RI	0.428601	0.415177	0.179146	0.107351	0.0801701	0.119837	0.0882256	0.1	0	0.1	0.1	0.2	0.1	0.246	0.0677277	0.0989173	0.0449852	0.080691	-0.00228387	0.0920537	-0.0187232	0.178525
uniform	2n = 8x*	1000	5	LO	0.430036	0.419806	0.181718	0.105446	0.0807051	0.104787	0.0763251	0	0	0.1	0	0.1	0.1	0.324	0.0751956	0.107037	0.0507571	0.087691	0.00270877	0.0985717	-0.0121777	0.185828
uniform	2n = 8x*	1000	5	WE	0.453306	0.429234	0.197997	0.116777	0.096341	0.108483	0.0727011	0	0	0.1	0.1	0.1	0.1	0.364	0.0900731	0.0986373	0.0638736	0.0780773	0.0134343	0.113989	-0.0184773	0.173189
uniform	2n = 8x*	1000	5	VR	NA	NA	NA	NA	NA	NA	NA	NA	NA	NA	NA	NA	NA	NA	NA	NA	NA	NA	NA	NA	NA	NA
uniform	2n = 8x*	1000	5	PD	NA	NA	NA	NA	NA	NA	NA	NA	NA	NA	NA	NA	NA	NA	NA	NA	NA	NA	NA	NA	NA	NA
uniform	2n = 8x*	1000	5	FA	NA	NA	NA	NA	NA	NA	NA	NA	NA	NA	NA	NA	NA	NA	NA	NA	NA	NA	NA	NA	NA	NA
uniform	2n = 2x	5	10	MM	0.00436654	0.0282822	0.00769979	0.0175471	0.0295867	0.00132249	0.0850478	0.26	0.28	0.2	0.2	0.26	0.29	0.2382	0.558575	0.673895	0.425662	0.609992	0.411957	0.439175	0.588969	0.63019
uniform	2n = 2x	5	10	ML	0.0294127	0.0185626	0.016788	0.0406862	0.0182088	0.0488889	0.154461	0.77	0.24	0.23	0.16	0.26	0.4	0.605	0.584704	0.729964	0.543891	0.695811	0.52944	0.558026	0.676952	0.713757
uniform	2n = 2x	5	10	RI	0.0544145	0.0924886	0.00928883	0.0068868	0.0829272	0.0136878	0.0890615	0.2	0.3	0.3	0.1	0.5	0.1	0.212	0.574604	0.701863	0.462078	0.61637	0.417692	0.504264	0.551618	0.673738
uniform	2n = 2x	5	10	LO	0.00843532	0.0537596	0.0132837	0.0469103	0.060219	0.00440966	0.094005	0.1	0.2	0.1	0.3	0.6	0.3	0.224	0.538411	0.678814	0.411809	0.592805	0.366913	0.45479	0.526107	0.652254
uniform	2n = 2x	5	10	WE	0.0297888	0.0807118	0.00996932	0.0298048	0.0984095	0.0295329	0.0638521	0.1	0.2	0.2	0.3	0.3	0.2	0.204	0.572393	0.682942	0.454402	0.583624	0.412138	0.494714	0.517196	0.643062
uniform	2n = 2x	5	10	VR	NA	NA	NA	NA	NA	NA	NA	NA	NA	NA	NA	NA	NA	NA	NA	NA	NA	NA	NA	NA	NA	NA
uniform	2n = 2x	5	10	PD	NA	NA	NA	NA	NA	NA	NA	NA	NA	NA	NA	NA	NA	NA	NA	NA	NA	NA	NA	NA	NA	NA
uniform	2n = 2x	5	10	FA	NA	NA	NA	NA	NA	NA	NA	NA	NA	NA	NA	NA	NA	NA	NA	NA	NA	NA	NA	NA	NA	NA
uniform	2n = 4x	5	10	MM	0.14855	0.160356	0.0185205	0.0734349	0.0125448	0.0142952	0.0902416	0.06	0.13	0.26	0.14	0.22	0.25	0.1776	0.303981	0.397132	0.218386	0.345778	0.202955	0.233709	0.316089	0.37479
uniform	2n = 4x	5	10	ML	0.106764	0.131547	0.0263161	0.00631036	0.0525621	0.062547	0.181646	0.26	0.13	0.35	0.37	0.15	0.31	0.5334	0.302403	0.400932	0.288613	0.395079	0.268881	0.308102	0.362639	0.426563
uniform	2n = 4x	5	10	RI	0.15648	0.217933	0.00375081	0.0979027	0.00816111	0.0779944	0.100269	0.3	0	0.2	0.1	0.3	0.2	0.224	0.354878	0.335674	0.24744	0.294317	0.200009	0.293713	0.193824	0.388697
uniform	2n = 4x	5	10	LO	0.170803	0.221776	0.0428588	0.0832257	0.000536621	0.10193	0.103865	0.1	0	0.3	0.2	0.3	0.3	0.22	0.392563	0.345448	0.272325	0.307342	0.225614	0.317787	0.20601	0.402153
uniform	2n = 4x	5	10	WE	0.19329	0.247361	0.0242735	0.10563	0.0257998	0.0756767	0.0834193	0.1	0	0.2	0.2	0.3	0.3	0.23	0.412183	0.341374	0.321788	0.289489	0.271413	0.370404	0.191783	0.381513
uniform	2n = 4x	5	10	VR	NA	NA	NA	NA	NA	NA	NA	NA	NA	NA	NA	NA	NA	NA	NA	NA	NA	NA	NA	NA	NA	NA
uniform	2n = 4x	5	10	PD	NA	NA	NA	NA	NA	NA	NA	NA	NA	NA	NA	NA	NA	NA	NA	NA	NA	NA	NA	NA	NA	NA
uniform	2n = 4x	5	10	FA	NA	NA	NA	NA	NA	NA	NA	NA	NA	NA	NA	NA	NA	NA	NA	NA	NA	NA	NA	NA	NA	NA
uniform	2n = 6x	5	10	MM	0.167098	0.245696	0.000131847	0.104202	0.0142075	0.0168974	0.0939369	0.21	0.11	0.27	0.16	0.23	0.17	0.1632	0.22007	0.291534	0.151111	0.244101	0.136004	0.166149	0.213673	0.274055
uniform	2n = 6x	5	10	ML	0.134127	0.199388	0.024716	0.0506942	0.0330873	0.0687011	0.184623	0.26	0.22	0.18	0.09	0.16	0.23	0.499	0.223157	0.316706	0.212667	0.315091	0.192141	0.233007	0.280234	0.349118
uniform	2n = 6x	5	10	RI	0.161829	0.248142	0.0356078	0.0979525	0.0443957	0.032985	0.105021	0.2	0.2	0.5	0.2	0.2	0.3	0.194	0.233347	0.332594	0.161533	0.293719	0.11308	0.209221	0.193171	0.388162
uniform	2n = 6x	5	10	LO	0.12828	0.286206	0.0163671	0.086222	0.0422001	0.0466515	0.101927	0.2	0.3	0.2	0.4	0.1	0.2	0.18	0.239242	0.35617	0.165775	0.317756	0.117313	0.21345	0.217271	0.411577
uniform	2n = 6x	5	10	WE	0.153189	0.303586	0.0335639	0.104594	0.0546036	0.0407855	0.0927467	0.1	0.3	0.4	0.4	0	0.3	0.16	0.260899	0.364875	0.197542	0.315511	0.14542	0.248571	0.217951	0.406827
uniform	2n = 6x	5	10	VR	NA	NA	NA	NA	NA	NA	NA	NA	NA	NA	NA	NA	NA	NA	NA	NA	NA	NA	NA	NA	NA	NA
uniform	2n = 6x	5	10	PD	NA	NA	NA	NA	NA	NA	NA	NA	NA	NA	NA	NA	NA	NA	NA	NA	NA	NA	NA	NA	NA	NA
uniform	2n = 6x	5	10	FA	NA	NA	NA	NA	NA	NA	NA	NA	NA	NA	NA	NA	NA	NA	NA	NA	NA	NA	NA	NA	NA	NA
uniform	2n = 8x	5	10	MM	0.323279	0.298807	0.110821	0.161514	0.0375571	0.0335119	0.137892	0.06	0.05	0.12	0.14	0.21	0.19	0.1512	0.152339	0.148974	0.11185	0.131791	0.095557	0.128083	0.0982961	0.164988
uniform	2n = 8x	5	10	ML	0.289409	0.284035	0.128232	0.201223	0.00395043	0.0607054	0.195288	0.2	0.1	0	0	0.4	0.4	0.496	0.131542	0.109984	0.126033	0.108506	0.0584551	0.192462	-0.0114301	0.225364
uniform	2n = 8x	5	10	RI	0.354313	0.368369	0.229535	0.243627	0.104898	0.0147222	0.0938761	0.2	0	0.1	0	0.1	0.3	0.166	0.0951247	0.0892217	0.0621816	0.07183	0.0156959	0.108399	-0.0263098	0.168598
uniform	2n = 8x	5	10	LO	0.346155	0.360744	0.229061	0.244835	0.11275	0.0368185	0.0809577	0.1	0	0.1	0	0.3	0.3	0.19	0.125362	0.0932189	0.0830373	0.0767475	0.0359694	0.129738	-0.0236572	0.175619
uniform	2n = 8x	5	10	WE	0.34858	0.34849	0.233147	0.255451	0.126172	0.0584315	0.0769345	0.1	0	0.2	0.1	0.2	0.3	0.226	0.140001	0.096373	0.0992044	0.0799239	0.048992	0.148917	-0.0211637	0.179394
uniform	2n = 8x	5	10	VR	NA	NA	NA	NA	NA	NA	NA	NA	NA	NA	NA	NA	NA	NA	NA	NA	NA	NA	NA	NA	NA	NA
uniform	2n = 8x	5	10	PD	NA	NA	NA	NA	NA	NA	NA	NA	NA	NA	NA	NA	NA	NA	NA	NA	NA	NA	NA	NA	NA	NA
uniform	2n = 8x	5	10	FA	NA	NA	NA	NA	NA	NA	NA	NA	NA	NA	NA	NA	NA	NA	NA	NA	NA	NA	NA	NA	NA	NA
uniform	2n = 4x*	5	10	MM	0.152061	0.209818	0.0302118	0.0810622	0.0511444	0.0245278	0.0893653	0.15	0.1	0.32	0.24	0.22	0.22	0.1838	0.322972	0.418366	0.227217	0.365554	0.212121	0.242205	0.336224	0.394176
uniform	2n = 4x*	5	10	ML	0.119068	0.172984	0.0100549	0.030008	0.0273128	0.0616512	0.182833	0.28	0.09	0.39	0.36	0.11	0.24	0.5138	0.319906	0.439338	0.306216	0.433254	0.286618	0.325559	0.401959	0.463539
uniform	2n = 4x*	5	10	RI	0.124047	0.22303	0.0442186	0.0909567	0.122622	0.095003	0.0929921	0.4	0.2	0.3	0.1	0.1	0.3	0.208	0.321605	0.45343	0.234728	0.412032	0.184838	0.283412	0.316512	0.49928
uniform	2n = 4x*	5	10	LO	0.121734	0.189389	0.0226009	0.0748963	0.110508	0.0815548	0.0970865	0.4	0	0.3	0	0.1	0.3	0.208	0.336061	0.45953	0.243481	0.419376	0.194165	0.29157	0.324081	0.506247
uniform	2n = 4x*	5	10	WE	0.150854	0.207273	0.0418215	0.102976	0.131042	0.101048	0.0749693	0.3	0.1	0.3	0.3	0	0.2	0.204	0.366113	0.4655	0.297902	0.416727	0.244828	0.349195	0.323034	0.502331
uniform	2n = 4x*	5	10	VR	NA	NA	NA	NA	NA	NA	NA	NA	NA	NA	NA	NA	NA	NA	NA	NA	NA	NA	NA	NA	NA	NA
uniform	2n = 4x*	5	10	PD	NA	NA	NA	NA	NA	NA	NA	NA	NA	NA	NA	NA	NA	NA	NA	NA	NA	NA	NA	NA	NA	NA
uniform	2n = 4x*	5	10	FA	NA	NA	NA	NA	NA	NA	NA	NA	NA	NA	NA	NA	NA	NA	NA	NA	NA	NA	NA	NA	NA	NA
uniform	2n = 6x*	5	10	MM	0.164225	0.274049	0.00523233	0.108611	0.0122129	0.014408	0.0899038	0.16	0.07	0.21	0.16	0.19	0.22	0.1702	0.238925	0.292386	0.155698	0.245802	0.141341	0.169989	0.215236	0.275888
uniform	2n = 6x*	5	10	ML	0.143123	0.229073	0.0335336	0.0549697	0.0428228	0.0706353	0.182348	0.24	0.1	0.19	0.11	0.16	0.25	0.5106	0.254712	0.318608	0.242692	0.317444	0.222435	0.26274	0.282587	0.351463
uniform	2n = 6x*	5	10	RI	0.144514	0.304954	0.132903	0.0743321	0.118149	0.095108	0.084332	0.1	0	0.2	0	0.1	0.2	0.178	0.223348	0.426328	0.152921	0.375253	0.104845	0.200284	0.280098	0.463105
uniform	2n = 6x*	5	10	LO	0.0911174	0.28271	0.122065	0.0660987	0.0561189	0.0837075	0.0855967	0.1	0	0.3	0.2	0.1	0.2	0.17	0.232478	0.455287	0.160907	0.402417	0.112473	0.208579	0.309084	0.488073
uniform	2n = 6x*	5	10	WE	0.113843	0.297679	0.146423	0.0966445	0.0713536	0.106763	0.0708925	0.1	0	0.2	0.2	0.1	0.2	0.126	0.274221	0.459886	0.208977	0.394866	0.156818	0.259973	0.303542	0.479002
uniform	2n = 6x*	5	10	VR	NA	NA	NA	NA	NA	NA	NA	NA	NA	NA	NA	NA	NA	NA	NA	NA	NA	NA	NA	NA	NA	NA
uniform	2n = 6x*	5	10	PD	NA	NA	NA	NA	NA	NA	NA	NA	NA	NA	NA	NA	NA	NA	NA	NA	NA	NA	NA	NA	NA	NA
uniform	2n = 6x*	5	10	FA	NA	NA	NA	NA	NA	NA	NA	NA	NA	NA	NA	NA	NA	NA	NA	NA	NA	NA	NA	NA	NA	NA
uniform	2n = 8x*	5	10	MM	0.295367	0.274323	0.101007	0.120296	0.0171921	0.000773547	0.140463	0.11	0.11	0.11	0.16	0.18	0.17	0.1428	0.152812	0.191189	0.113945	0.169386	0.097406	0.130421	0.136202	0.20219
uniform	2n = 8x*	5	10	ML	0.279205	0.15416	0.141449	0.152838	0.0620522	0.00840068	0.179276	0.1	0.2	0	0.1	0.1	0.3	0.51	0.145771	0.155214	0.139005	0.155036	0.0719245	0.204834	0.0344017	0.271217
uniform	2n = 8x*	5	10	RI	0.318352	0.223757	0.217695	0.187726	0.0002156	0.095152	0.0913674	0.1	0	0	0.1	0	0.3	0.184	0.148214	0.228611	0.0970323	0.177072	0.050642	0.143005	0.0841336	0.266957
uniform	2n = 8x*	5	10	LO	0.359261	0.295224	0.21116	0.193005	0.0133837	0.0874239	0.0855942	0	0	0.3	0.2	0.1	0.5	0.204	0.167852	0.23236	0.111708	0.184742	0.0645884	0.158331	0.0893664	0.276761
uniform	2n = 8x*	5	10	WE	0.384064	0.294135	0.220301	0.204642	0.0048457	0.0924872	0.0678822	0	0	0.1	0	0.1	0.4	0.2	0.194028	0.246964	0.137105	0.193858	0.0874368	0.186093	0.100269	0.284046
uniform	2n = 8x*	5	10	VR	NA	NA	NA	NA	NA	NA	NA	NA	NA	NA	NA	NA	NA	NA	NA	NA	NA	NA	NA	NA	NA	NA
uniform	2n = 8x*	5	10	PD	NA	NA	NA	NA	NA	NA	NA	NA	NA	NA	NA	NA	NA	NA	NA	NA	NA	NA	NA	NA	NA	NA
uniform	2n = 8x*	5	10	FA	NA	NA	NA	NA	NA	NA	NA	NA	NA	NA	NA	NA	NA	NA	NA	NA	NA	NA	NA	NA	NA	NA
uniform	2n = 2x	10	10	MM	0.00514149	0.00563906	0.00967627	0.00105783	0.00333031	0.0106596	0.0895159	0.54	0.3	0.34	0.36	0.34	0.35	0.3018	0.692606	0.775881	0.573691	0.743598	0.561384	0.585744	0.727415	0.758955
uniform	2n = 2x	10	10	ML	0.0171153	0.0154033	0.0202504	0.00869096	0.0266819	0.0320396	0.138689	0.83	0.32	0.34	0.37	0.36	0.37	0.6316	0.724336	0.819199	0.6881	0.807688	0.676859	0.69902	0.794354	0.820244
uniform	2n = 2x	10	10	RI	0.0352482	0.0229978	0.0292188	0.0223883	0.0284272	0.0498404	0.0915955	0.3	0.5	0.3	0.4	0.3	0.4	0.31	0.698086	0.79192	0.595474	0.735754	0.555514	0.632689	0.681242	0.782151
uniform	2n = 2x	10	10	LO	0.0300186	0.0836384	0.00607233	0.027048	0.01477	0.0594191	0.0990427	0.1	0.1	0.1	0.1	0.2	0.3	0.312	0.667121	0.779113	0.529449	0.735187	0.487849	0.568649	0.679325	0.782578
uniform	2n = 2x	10	10	WE	0.0620489	0.0344059	0.0471363	0.0645997	0.0616156	0.0070521	0.066938	0.1	0.3	0.3	0	0.1	0.4	0.312	0.68579	0.773329	0.621221	0.694735	0.582849	0.656828	0.63501	0.746203
uniform	2n = 2x	10	10	VR	NA	NA	NA	NA	NA	NA	NA	NA	NA	NA	NA	NA	NA	NA	NA	NA	NA	NA	NA	NA	NA	NA
uniform	2n = 2x	10	10	PD	NA	NA	NA	NA	NA	NA	NA	NA	NA	NA	NA	NA	NA	NA	NA	NA	NA	NA	NA	NA	NA	NA
uniform	2n = 2x	10	10	FA	NA	NA	NA	NA	NA	NA	NA	NA	NA	NA	NA	NA	NA	NA	NA	NA	NA	NA	NA	NA	NA	NA
uniform	2n = 4x	10	10	MM	0.132535	0.189384	0.0134115	0.0872533	0.0120174	0.00538131	0.0923723	0.11	0.07	0.31	0.17	0.29	0.32	0.2692	0.387557	0.488467	0.292784	0.436013	0.27705	0.30836	0.407667	0.46352
uniform	2n = 4x	10	10	ML	0.115309	0.169791	0.0108896	0.048775	0.0273553	0.0392831	0.157258	0.15	0.1	0.44	0.32	0.28	0.4	0.5876	0.370381	0.502736	0.345213	0.5016	0.326556	0.3636	0.47234	0.529756
uniform	2n = 4x	10	10	RI	0.150578	0.194654	0.0177837	0.0964792	0.0100384	0.0411671	0.0950653	0.1	0.1	0.4	0	0.1	0.3	0.256	0.351263	0.473732	0.249596	0.421018	0.201085	0.296885	0.327053	0.50674
uniform	2n = 4x	10	10	LO	0.141457	0.209936	0.0132989	0.0765063	5.919e-05	0.0701417	0.0929388	0.1	0.1	0.3	0.3	0.4	0.2	0.294	0.376573	0.48196	0.262005	0.431228	0.214672	0.308111	0.337443	0.516536
uniform	2n = 4x	10	10	WE	0.165038	0.224576	0.00042479	0.102321	0.0113367	0.0565115	0.0757052	0.1	0.1	0.3	0.1	0.3	0.2	0.29	0.419444	0.495384	0.334196	0.422323	0.282706	0.383766	0.332069	0.504913
uniform	2n = 4x	10	10	VR	NA	NA	NA	NA	NA	NA	NA	NA	NA	NA	NA	NA	NA	NA	NA	NA	NA	NA	NA	NA	NA	NA
uniform	2n = 4x	10	10	PD	NA	NA	NA	NA	NA	NA	NA	NA	NA	NA	NA	NA	NA	NA	NA	NA	NA	NA	NA	NA	NA	NA
uniform	2n = 4x	10	10	FA	NA	NA	NA	NA	NA	NA	NA	NA	NA	NA	NA	NA	NA	NA	NA	NA	NA	NA	NA	NA	NA	NA
uniform	2n = 6x	10	10	MM	0.164009	0.22337	0.00938497	0.0957195	0.00575724	0.0138746	0.0936738	0.2	0.1	0.22	0.2	0.19	0.18	0.1968	0.279727	0.342892	0.197579	0.302405	0.18219	0.212871	0.271232	0.332944
uniform	2n = 6x	10	10	ML	0.144564	0.203548	0.00983749	0.0712317	0.0360921	0.0456088	0.16564	0.22	0.16	0.13	0.14	0.25	0.28	0.5486	0.272062	0.368106	0.252628	0.367075	0.232927	0.272122	0.333442	0.399775
uniform	2n = 6x	10	10	RI	0.19854	0.221966	0.0300485	0.142545	0.0371912	0.0153382	0.0988693	0.2	0.2	0.3	0.4	0.4	0.1	0.23	0.282237	0.361398	0.192755	0.322265	0.145171	0.23945	0.221402	0.416306
uniform	2n = 6x	10	10	LO	0.19597	0.222954	0.0253164	0.119391	0.039684	0.0205396	0.0949201	0.2	0.1	0.1	0.4	0.5	0.4	0.22	0.292227	0.372192	0.197262	0.331796	0.150207	0.243426	0.231231	0.425345
uniform	2n = 6x	10	10	WE	0.208683	0.240095	0.0463567	0.135965	0.0543806	0.00198224	0.0836184	0.2	0.2	0.2	0.2	0.4	0.3	0.23	0.332641	0.381849	0.258601	0.329754	0.206133	0.309586	0.232141	0.420792
uniform	2n = 6x	10	10	VR	NA	NA	NA	NA	NA	NA	NA	NA	NA	NA	NA	NA	NA	NA	NA	NA	NA	NA	NA	NA	NA	NA
uniform	2n = 6x	10	10	PD	NA	NA	NA	NA	NA	NA	NA	NA	NA	NA	NA	NA	NA	NA	NA	NA	NA	NA	NA	NA	NA	NA
uniform	2n = 6x	10	10	FA	NA	NA	NA	NA	NA	NA	NA	NA	NA	NA	NA	NA	NA	NA	NA	NA	NA	NA	NA	NA	NA	NA
uniform	2n = 8x	10	10	MM	0.307207	0.293366	0.116151	0.125717	0.0455271	0.0132809	0.139076	0.04	0.02	0.15	0.21	0.29	0.14	0.1656	0.159391	0.165834	0.124909	0.154248	0.107545	0.142196	0.119179	0.188932
uniform	2n = 8x	10	10	ML	0.33154	0.332377	0.119745	0.10904	0.0431731	0.0168152	0.174652	0	0	0.2	0.2	0.1	0.1	0.512	0.0721863	0.187051	0.0681161	0.185307	0.001035	0.134587	0.0664868	0.298945
uniform	2n = 8x	10	10	RI	0.377791	0.344472	0.219815	0.200452	0.11653	0.0738075	0.100373	0	0.1	0.1	0.2	0.3	0.1	0.166	0.120229	0.164251	0.0805193	0.136293	0.0329282	0.127746	0.0356515	0.234199
uniform	2n = 8x	10	10	LO	0.373397	0.371755	0.223397	0.189503	0.10737	0.0518432	0.0895495	0	0	0	0.2	0.3	0	0.23	0.151662	0.153473	0.101315	0.126062	0.0538813	0.148293	0.0262174	0.223416
uniform	2n = 8x	10	10	WE	0.376384	0.366644	0.221626	0.187142	0.106201	0.0453254	0.0631339	0	0.1	0	0.3	0.3	0.1	0.196	0.159562	0.158175	0.114307	0.133153	0.0635945	0.16443	0.0309707	0.23258
uniform	2n = 8x	10	10	VR	NA	NA	NA	NA	NA	NA	NA	NA	NA	NA	NA	NA	NA	NA	NA	NA	NA	NA	NA	NA	NA	NA
uniform	2n = 8x	10	10	PD	NA	NA	NA	NA	NA	NA	NA	NA	NA	NA	NA	NA	NA	NA	NA	NA	NA	NA	NA	NA	NA	NA
uniform	2n = 8x	10	10	FA	NA	NA	NA	NA	NA	NA	NA	NA	NA	NA	NA	NA	NA	NA	NA	NA	NA	NA	NA	NA	NA	NA
uniform	2n = 4x*	10	10	MM	0.141384	0.196881	0.000121316	0.0940017	0.00721625	0.00835088	0.0927338	0.11	0.06	0.36	0.25	0.32	0.29	0.252	0.405505	0.48325	0.283973	0.434238	0.269223	0.298589	0.405648	0.461978
uniform	2n = 4x*	10	10	ML	0.118473	0.172478	0.0256828	0.0570771	0.0409331	0.0465509	0.158741	0.16	0.06	0.42	0.32	0.27	0.38	0.5792	0.390731	0.49566	0.355006	0.494626	0.336908	0.372842	0.465101	0.523053
uniform	2n = 4x*	10	10	RI	0.148263	0.137701	0.0431974	0.103333	0.029489	0.0220562	0.101588	0.1	0.2	0.4	0	0.3	0.2	0.254	0.350654	0.466684	0.249982	0.416511	0.201237	0.297491	0.322458	0.502421
uniform	2n = 4x*	10	10	LO	0.117054	0.106885	0.0262757	0.0929218	0.0296906	0.0207139	0.106643	0.1	0.1	0.5	0.1	0.3	0.4	0.284	0.340328	0.492007	0.238235	0.446676	0.190118	0.28521	0.353998	0.530668
uniform	2n = 4x*	10	10	WE	0.137947	0.132799	0.0566933	0.115206	0.053653	0.0460675	0.0868337	0.2	0.2	0.3	0.1	0.3	0.2	0.256	0.381535	0.490769	0.304325	0.430087	0.251719	0.355138	0.339108	0.513097
uniform	2n = 4x*	10	10	VR	NA	NA	NA	NA	NA	NA	NA	NA	NA	NA	NA	NA	NA	NA	NA	NA	NA	NA	NA	NA	NA	NA
uniform	2n = 4x*	10	10	PD	NA	NA	NA	NA	NA	NA	NA	NA	NA	NA	NA	NA	NA	NA	NA	NA	NA	NA	NA	NA	NA	NA
uniform	2n = 4x*	10	10	FA	NA	NA	NA	NA	NA	NA	NA	NA	NA	NA	NA	NA	NA	NA	NA	NA	NA	NA	NA	NA	NA	NA
uniform	2n = 6x*	10	10	MM	0.176312	0.257482	0.0290691	0.0976179	0.0131704	0.0282734	0.0915515	0.15	0.09	0.2	0.27	0.19	0.21	0.1874	0.309483	0.369868	0.213313	0.319191	0.198356	0.22817	0.288928	0.348818
uniform	2n = 6x*	10	10	ML	0.15404	0.224582	0.000130405	0.0562304	0.0503798	0.0732042	0.165222	0.17	0.09	0.19	0.27	0.24	0.29	0.5532	0.304664	0.388741	0.281019	0.384462	0.261734	0.30008	0.351613	0.416365
uniform	2n = 6x*	10	10	RI	0.131919	0.254536	0.0936884	0.107238	0.0365829	0.0214597	0.0905139	0.2	0	0.4	0.1	0.2	0.1	0.216	0.275754	0.49168	0.199341	0.462905	0.149124	0.248532	0.367802	0.548424
uniform	2n = 6x*	10	10	LO	0.11618	0.252901	0.085503	0.0924566	0.0228961	0.0467825	0.0921994	0	0	0.4	0.2	0.2	0.1	0.242	0.313856	0.52418	0.229741	0.491642	0.179429	0.278855	0.400297	0.573313
uniform	2n = 6x*	10	10	WE	0.122616	0.282379	0.114314	0.105462	0.0373994	0.0257101	0.0772491	0	0	0.3	0.1	0.2	0	0.206	0.344271	0.527425	0.28423	0.476456	0.22937	0.33729	0.386771	0.557213
uniform	2n = 6x*	10	10	VR	NA	NA	NA	NA	NA	NA	NA	NA	NA	NA	NA	NA	NA	NA	NA	NA	NA	NA	NA	NA	NA	NA
uniform	2n = 6x*	10	10	PD	NA	NA	NA	NA	NA	NA	NA	NA	NA	NA	NA	NA	NA	NA	NA	NA	NA	NA	NA	NA	NA	NA
uniform	2n = 6x*	10	10	FA	NA	NA	NA	NA	NA	NA	NA	NA	NA	NA	NA	NA	NA	NA	NA	NA	NA	NA	NA	NA	NA	NA
uniform	2n = 8x*	10	10	MM	0.301733	0.288674	0.111965	0.135715	0.0346841	0.00565216	0.141981	0.07	0.06	0.2	0.17	0.16	0.16	0.1736	0.169822	0.209199	0.135036	0.194301	0.117458	0.15253	0.159765	0.228363
uniform	2n = 8x*	10	10	ML	0.232526	0.284648	0.113507	0.125892	0.015461	0.00775558	0.165519	0.2	0.1	0	0.1	0.1	0.1	0.55	0.119675	0.143982	0.111952	0.143532	0.0457525	0.177172	0.0228909	0.260052
uniform	2n = 8x*	10	10	RI	0.286063	0.346119	0.172406	0.191156	0.07305	0.137698	0.0827126	0	0.2	0	0.2	0.1	0.1	0.2	0.134109	0.155453	0.0908733	0.13546	0.0427665	0.13856	0.0298883	0.238044
uniform	2n = 8x*	10	10	LO	0.321769	0.375117	0.207957	0.200335	0.0640092	0.117567	0.0773085	0	0	0.2	0	0.1	0.1	0.248	0.150026	0.200433	0.101581	0.176954	0.0535265	0.149166	0.0708228	0.279124
uniform	2n = 8x*	10	10	WE	0.317561	0.387614	0.231692	0.217369	0.0699053	0.144705	0.0719352	0	0.1	0.1	0	0.1	0.2	0.222	0.155843	0.184451	0.113467	0.155648	0.0619546	0.164376	0.0537139	0.254371
uniform	2n = 8x*	10	10	VR	NA	NA	NA	NA	NA	NA	NA	NA	NA	NA	NA	NA	NA	NA	NA	NA	NA	NA	NA	NA	NA	NA
uniform	2n = 8x*	10	10	PD	NA	NA	NA	NA	NA	NA	NA	NA	NA	NA	NA	NA	NA	NA	NA	NA	NA	NA	NA	NA	NA	NA
uniform	2n = 8x*	10	10	FA	NA	NA	NA	NA	NA	NA	NA	NA	NA	NA	NA	NA	NA	NA	NA	NA	NA	NA	NA	NA	NA	NA
uniform	2n = 2x	15	10	MM	0.000195012	0.0169462	0.00623768	0.013079	0.000174713	0.00383219	0.0892471	0.68	0.3	0.36	0.37	0.41	0.41	0.3692	0.770547	0.830909	0.644768	0.813345	0.633879	0.655402	0.800544	0.825405
uniform	2n = 2x	15	10	ML	0.0189616	0.00448906	0.00903359	0.00438104	0.00820547	0.0182869	0.130282	0.85	0.37	0.39	0.41	0.39	0.53	0.657	0.787599	0.865553	0.737288	0.862042	0.727583	0.746697	0.851969	0.871477
uniform	2n = 2x	15	10	RI	0.0627397	0.00480202	0.0278902	0.0984626	0.0175637	0.0904848	0.0880297	0.3	0.6	0.3	0.3	0.5	0.3	0.35	0.800676	0.849783	0.667089	0.817649	0.634138	0.69762	0.776194	0.852064
uniform	2n = 2x	15	10	LO	0.0515975	0.0105324	0.0237714	0.0737962	0.0150989	0.0739595	0.0942564	0.8	0.3	0.3	0.3	0.5	0.4	0.376	0.774952	0.846913	0.608314	0.824492	0.57316	0.641233	0.783858	0.858094
uniform	2n = 2x	15	10	WE	0.0886667	0.0224974	0.0599924	0.111308	0.0535715	0.112874	0.0680029	0.2	0.4	0.6	0.1	0.2	0.2	0.362	0.793833	0.848548	0.706083	0.799698	0.67682	0.733118	0.755548	0.836617
uniform	2n = 2x	15	10	VR	NA	NA	NA	NA	NA	NA	NA	NA	NA	NA	NA	NA	NA	NA	NA	NA	NA	NA	NA	NA	NA	NA
uniform	2n = 2x	15	10	PD	NA	NA	NA	NA	NA	NA	NA	NA	NA	NA	NA	NA	NA	NA	NA	NA	NA	NA	NA	NA	NA	NA
uniform	2n = 2x	15	10	FA	NA	NA	NA	NA	NA	NA	NA	NA	NA	NA	NA	NA	NA	NA	NA	NA	NA	NA	NA	NA	NA	NA
uniform	2n = 4x	15	10	MM	0.143002	0.182298	0.016644	0.0813686	0.0160748	0.0227006	0.0881319	0.05	0.07	0.39	0.27	0.4	0.36	0.2922	0.438887	0.52322	0.322617	0.481292	0.30751	0.337561	0.453458	0.508188
uniform	2n = 4x	15	10	ML	0.127222	0.170413	0.00864353	0.0589147	0.0100831	0.0206582	0.147251	0.06	0.06	0.48	0.36	0.3	0.47	0.6296	0.416572	0.5348	0.36968	0.529033	0.352177	0.386924	0.501122	0.555844
uniform	2n = 4x	15	10	RI	0.137518	0.179265	0.0236716	0.043023	0.0259555	0.0481817	0.0925856	0.1	0.1	0.6	0.2	0.8	0.4	0.28	0.4519	0.571182	0.325866	0.532158	0.278506	0.371645	0.445258	0.609126
uniform	2n = 4x	15	10	LO	0.124621	0.181036	0.0342757	0.0300142	0.0278759	0.0503805	0.0964607	0.1	0.3	0.3	0.4	0.6	0.5	0.322	0.453943	0.573019	0.323328	0.53676	0.276406	0.368713	0.449841	0.613606
uniform	2n = 4x	15	10	WE	0.141097	0.189459	0.0169597	0.0588244	0.0442513	0.0216712	0.0777599	0.2	0.2	0.4	0.1	0.6	0.4	0.256	0.488401	0.582424	0.401484	0.529729	0.351098	0.449552	0.444429	0.605509
uniform	2n = 4x	15	10	VR	NA	NA	NA	NA	NA	NA	NA	NA	NA	NA	NA	NA	NA	NA	NA	NA	NA	NA	NA	NA	NA	NA
uniform	2n = 4x	15	10	PD	NA	NA	NA	NA	NA	NA	NA	NA	NA	NA	NA	NA	NA	NA	NA	NA	NA	NA	NA	NA	NA	NA
uniform	2n = 4x	15	10	FA	NA	NA	NA	NA	NA	NA	NA	NA	NA	NA	NA	NA	NA	NA	NA	NA	NA	NA	NA	NA	NA	NA
uniform	2n = 6x	15	10	MM	0.167087	0.226156	0.00896171	0.087924	0.0170771	0.00140477	0.0945794	0.13	0.11	0.29	0.14	0.22	0.19	0.2018	0.293648	0.375472	0.205841	0.331531	0.190574	0.221009	0.300838	0.361538
uniform	2n = 6x	15	10	ML	0.151614	0.212143	0.0249807	0.0676115	0.0377181	0.0360605	0.157703	0.19	0.11	0.2	0.15	0.22	0.31	0.569	0.296738	0.400161	0.266345	0.394653	0.247401	0.285085	0.362171	0.426178
uniform	2n = 6x	15	10	RI	0.142197	0.23743	0.0402643	0.13004	0.00896417	0.0339697	0.0978773	0.1	0	0.4	0.2	0.3	0.2	0.22	0.268964	0.45218	0.178647	0.40124	0.132023	0.224482	0.306141	0.48841
uniform	2n = 6x	15	10	LO	0.152398	0.25284	0.03093	0.122942	0.00193693	0.0209542	0.0983907	0.2	0	0.6	0.2	0.4	0.2	0.22	0.290459	0.453283	0.190579	0.403372	0.144605	0.235732	0.308113	0.490623
uniform	2n = 6x	15	10	WE	0.16014	0.267135	0.0429962	0.13753	0.00332592	0.0330636	0.0830259	0.2	0	0.4	0.2	0.3	0.4	0.218	0.326517	0.459119	0.250228	0.389945	0.198004	0.301036	0.297863	0.474837
uniform	2n = 6x	15	10	VR	NA	NA	NA	NA	NA	NA	NA	NA	NA	NA	NA	NA	NA	NA	NA	NA	NA	NA	NA	NA	NA	NA
uniform	2n = 6x	15	10	PD	NA	NA	NA	NA	NA	NA	NA	NA	NA	NA	NA	NA	NA	NA	NA	NA	NA	NA	NA	NA	NA	NA
uniform	2n = 6x	15	10	FA	NA	NA	NA	NA	NA	NA	NA	NA	NA	NA	NA	NA	NA	NA	NA	NA	NA	NA	NA	NA	NA	NA
uniform	2n = 8x	15	10	MM	0.298935	0.2997	0.119328	0.136452	0.0224476	0.0164123	0.13526	0.06	0.06	0.23	0.16	0.2	0.15	0.1616	0.171794	0.185194	0.137436	0.174523	0.119754	0.155031	0.139202	0.209401
uniform	2n = 8x	15	10	ML	0.304479	0.338598	0.110341	0.132756	0.0110733	0.0127513	0.172483	0	0.1	0	0.2	0.3	0.2	0.542	0.119844	0.112012	0.109723	0.110957	0.0449001	0.173626	-0.0094547	0.228196
uniform	2n = 8x	15	10	RI	0.333759	0.38102	0.170452	0.144462	0.0963697	0.0492615	0.0968698	0	0.1	0.1	0.3	0.3	0.2	0.178	0.143681	0.0973796	0.0965295	0.0826309	0.0488157	0.143804	-0.0208076	0.184319
uniform	2n = 8x	15	10	LO	0.343688	0.385485	0.186529	0.162222	0.0979944	0.0653065	0.0863283	0	0.1	0.1	0.3	0.4	0.4	0.22	0.150249	0.0941378	0.0995576	0.078406	0.0524697	0.146204	-0.0231749	0.178385
uniform	2n = 8x	15	10	WE	0.345579	0.390823	0.200213	0.161929	0.111058	0.0761866	0.0705077	0.1	0	0.1	0.1	0.3	0.5	0.208	0.149318	0.0973796	0.107647	0.076815	0.0565391	0.158193	-0.0194276	0.171647
uniform	2n = 8x	15	10	VR	NA	NA	NA	NA	NA	NA	NA	NA	NA	NA	NA	NA	NA	NA	NA	NA	NA	NA	NA	NA	NA	NA
uniform	2n = 8x	15	10	PD	NA	NA	NA	NA	NA	NA	NA	NA	NA	NA	NA	NA	NA	NA	NA	NA	NA	NA	NA	NA	NA	NA
uniform	2n = 8x	15	10	FA	NA	NA	NA	NA	NA	NA	NA	NA	NA	NA	NA	NA	NA	NA	NA	NA	NA	NA	NA	NA	NA	NA
uniform	2n = 4x*	15	10	MM	0.147976	0.218964	0.0202717	0.0766698	0.0126507	0.0105033	0.0908336	0.04	0.04	0.38	0.23	0.29	0.23	0.289	0.449587	0.520789	0.323386	0.468242	0.30857	0.338045	0.440581	0.495015
uniform	2n = 4x*	15	10	ML	0.131113	0.193287	0.00751606	0.0534229	0.0161128	0.0477019	0.148722	0.08	0.04	0.49	0.32	0.26	0.41	0.6278	0.430657	0.537459	0.376494	0.529887	0.359329	0.393405	0.502085	0.556594
uniform	2n = 4x*	15	10	RI	0.120895	0.23941	0.0255798	0.074813	0.00654412	0.0311301	0.0945567	0.2	0	0.2	0.2	0.2	0.3	0.338	0.415441	0.524581	0.288443	0.478927	0.241666	0.333884	0.387807	0.560777
uniform	2n = 4x*	15	10	LO	0.114499	0.225331	0.00638006	0.0511409	0.0084692	0.04656	0.0969005	0.4	0	0.1	0.2	0.4	0.2	0.338	0.442807	0.544833	0.303817	0.502194	0.257924	0.348342	0.412681	0.5821
uniform	2n = 4x*	15	10	WE	0.132697	0.24877	0.0255275	0.0681558	0.0178896	0.0213849	0.0786283	0.4	0	0.2	0.2	0.1	0.2	0.35	0.492297	0.560496	0.391627	0.485989	0.342141	0.438948	0.399979	0.563514
uniform	2n = 4x*	15	10	VR	NA	NA	NA	NA	NA	NA	NA	NA	NA	NA	NA	NA	NA	NA	NA	NA	NA	NA	NA	NA	NA	NA
uniform	2n = 4x*	15	10	PD	NA	NA	NA	NA	NA	NA	NA	NA	NA	NA	NA	NA	NA	NA	NA	NA	NA	NA	NA	NA	NA	NA
uniform	2n = 4x*	15	10	FA	NA	NA	NA	NA	NA	NA	NA	NA	NA	NA	NA	NA	NA	NA	NA	NA	NA	NA	NA	NA	NA	NA
uniform	2n = 6x*	15	10	MM	0.178708	0.24561	0.00660405	0.0913797	0.00720604	0.00650373	0.0917698	0.17	0.05	0.29	0.16	0.22	0.18	0.1912	0.313273	0.392032	0.21297	0.333039	0.198173	0.22767	0.303424	0.362012
uniform	2n = 6x*	15	10	ML	0.163171	0.222242	0.0189595	0.0705606	0.0319692	0.0569104	0.157395	0.17	0.11	0.28	0.21	0.24	0.32	0.572	0.322609	0.427796	0.286489	0.413743	0.267942	0.304823	0.382494	0.444046
uniform	2n = 6x*	15	10	RI	0.176957	0.276403	0.0461863	0.0916969	0.0022375	0.0255897	0.0934995	0.1	0	0.3	0.1	0.6	0.1	0.27	0.3451	0.494299	0.244974	0.457103	0.196364	0.292383	0.362955	0.542013
uniform	2n = 6x*	15	10	LO	0.164908	0.280265	0.0678867	0.0784619	0.0216767	0.0146102	0.0942282	0	0	0.2	0.1	0.6	0.1	0.26	0.349403	0.50355	0.244513	0.467811	0.196508	0.291349	0.374565	0.551688
uniform	2n = 6x*	15	10	WE	0.168478	0.289098	0.0783158	0.094228	0.021856	0.00223535	0.0776237	0.1	0	0.4	0.1	0.5	0.2	0.236	0.385438	0.505787	0.311075	0.455544	0.25803	0.36225	0.36382	0.538519
uniform	2n = 6x*	15	10	VR	NA	NA	NA	NA	NA	NA	NA	NA	NA	NA	NA	NA	NA	NA	NA	NA	NA	NA	NA	NA	NA	NA
uniform	2n = 6x*	15	10	PD	NA	NA	NA	NA	NA	NA	NA	NA	NA	NA	NA	NA	NA	NA	NA	NA	NA	NA	NA	NA	NA	NA
uniform	2n = 6x*	15	10	FA	NA	NA	NA	NA	NA	NA	NA	NA	NA	NA	NA	NA	NA	NA	NA	NA	NA	NA	NA	NA	NA	NA
uniform	2n = 8x*	15	10	MM	0.290412	0.28999	0.103202	0.141842	0.0243521	0.0028745	0.143552	0.06	0.08	0.17	0.17	0.25	0.24	0.1632	0.181027	0.209527	0.145228	0.196755	0.127525	0.162839	0.161828	0.23119
uniform	2n = 8x*	15	10	ML	0.268612	0.289531	0.136892	0.155809	0.0233074	0.0247536	0.167569	0.1	0.1	0.1	0.3	0.2	0.3	0.536	0.117414	0.214517	0.109039	0.21097	0.0432885	0.173849	0.0938837	0.3223
uniform	2n = 8x*	15	10	RI	0.320371	0.342169	0.196834	0.243037	0.0613843	0.0514283	0.0892181	0	0.1	0.1	0.1	0.1	0.2	0.186	0.130672	0.234562	0.0892992	0.194584	0.0407594	0.137419	0.095279	0.290054
uniform	2n = 8x*	15	10	LO	0.345003	0.366987	0.200826	0.247771	0.0792763	0.0651354	0.0807663	0	0	0	0.1	0.1	0.2	0.228	0.137328	0.236983	0.0930414	0.197961	0.044904	0.140748	0.0979362	0.294027
uniform	2n = 8x*	15	10	WE	0.333564	0.356976	0.204851	0.2578	0.0704671	0.0777936	0.0581716	0	0.1	0.1	0	0	0.2	0.228	0.155955	0.243245	0.112244	0.211716	0.0612831	0.162622	0.108082	0.310797
uniform	2n = 8x*	15	10	VR	NA	NA	NA	NA	NA	NA	NA	NA	NA	NA	NA	NA	NA	NA	NA	NA	NA	NA	NA	NA	NA	NA
uniform	2n = 8x*	15	10	PD	NA	NA	NA	NA	NA	NA	NA	NA	NA	NA	NA	NA	NA	NA	NA	NA	NA	NA	NA	NA	NA	NA
uniform	2n = 8x*	15	10	FA	NA	NA	NA	NA	NA	NA	NA	NA	NA	NA	NA	NA	NA	NA	NA	NA	NA	NA	NA	NA	NA	NA
uniform	2n = 2x	20	10	MM	0.0106591	0.0066605	0.00484679	0.00598066	0.0115453	0.0196558	0.0886147	0.83	0.37	0.45	0.44	0.44	0.44	0.417	0.800392	0.866616	0.667319	0.850795	0.656991	0.677396	0.840363	0.860596
uniform	2n = 2x	20	10	ML	0.009809	0.000880606	0.00347487	0.000596515	0.00199207	0.00210952	0.125449	0.93	0.38	0.45	0.42	0.41	0.55	0.688	0.818526	0.895611	0.75198	0.892807	0.742908	0.760775	0.884844	0.900247
uniform	2n = 2x	20	10	RI	0.0248304	0.0158265	0.0167774	0.0153943	0.0109424	0.0248485	0.0844567	0.4	0.3	0.3	0.2	0.4	0.5	0.388	0.822406	0.895445	0.713361	0.875859	0.682642	0.741563	0.84623	0.900089
uniform	2n = 2x	20	10	LO	0.00380675	0.0442251	0.0364494	0.00169195	0.0427516	0.0452845	0.0922632	0.4	0.4	0.3	0.3	0.3	0.3	0.436	0.801964	0.88626	0.656834	0.871455	0.623617	0.687683	0.840799	0.896539
uniform	2n = 2x	20	10	WE	0.0480296	0.00310698	0.0132944	0.0505898	0.00231987	0.00446194	0.0597458	0.5	0.4	0.3	0.3	0.3	0.6	0.36	0.814957	0.88171	0.74362	0.850484	0.717337	0.76779	0.816041	0.878908
uniform	2n = 2x	20	10	VR	NA	NA	NA	NA	NA	NA	NA	NA	NA	NA	NA	NA	NA	NA	NA	NA	NA	NA	NA	NA	NA	NA
uniform	2n = 2x	20	10	PD	NA	NA	NA	NA	NA	NA	NA	NA	NA	NA	NA	NA	NA	NA	NA	NA	NA	NA	NA	NA	NA	NA
uniform	2n = 2x	20	10	FA	NA	NA	NA	NA	NA	NA	NA	NA	NA	NA	NA	NA	NA	NA	NA	NA	NA	NA	NA	NA	NA	NA
uniform	2n = 4x	20	10	MM	0.131587	0.191498	0.0111233	0.072379	0.00741286	0.0131607	0.0902528	0.04	0.04	0.47	0.28	0.39	0.34	0.3386	0.449925	0.537153	0.328197	0.486897	0.313226	0.343004	0.4596	0.513274
uniform	2n = 4x	20	10	ML	0.118712	0.181228	0.00662772	0.0531196	0.0132367	0.0202993	0.142469	0.08	0.04	0.63	0.36	0.41	0.42	0.663	0.426346	0.552334	0.367486	0.537747	0.350421	0.384306	0.510649	0.563778
uniform	2n = 4x	20	10	RI	0.182583	0.173149	0.000477279	0.104275	0.0451159	0.0802286	0.0998559	0.1	0.2	0.5	0.1	0.5	0.2	0.352	0.465997	0.514267	0.320607	0.467328	0.275082	0.364697	0.375482	0.550084
uniform	2n = 4x	20	10	LO	0.157818	0.157187	0.00956054	0.078924	0.0396869	0.0694825	0.0990478	0	0.2	0.4	0.1	0.7	0.3	0.406	0.489369	0.517541	0.330654	0.478657	0.286125	0.373757	0.386396	0.561434
uniform	2n = 4x	20	10	WE	0.173657	0.181505	0.00772534	0.0928496	0.0563286	0.0547544	0.0807955	0	0.2	0.2	0.1	0.4	0.2	0.354	0.535171	0.525665	0.418263	0.466699	0.370687	0.463649	0.376822	0.54787
uniform	2n = 4x	20	10	VR	NA	NA	NA	NA	NA	NA	NA	NA	NA	NA	NA	NA	NA	NA	NA	NA	NA	NA	NA	NA	NA	NA
uniform	2n = 4x	20	10	PD	NA	NA	NA	NA	NA	NA	NA	NA	NA	NA	NA	NA	NA	NA	NA	NA	NA	NA	NA	NA	NA	NA
uniform	2n = 4x	20	10	FA	NA	NA	NA	NA	NA	NA	NA	NA	NA	NA	NA	NA	NA	NA	NA	NA	NA	NA	NA	NA	NA	NA
uniform	2n = 6x	20	10	MM	0.164472	0.233423	0.00549707	0.0948782	0.0117301	0.00925782	0.0926955	0.2	0.07	0.21	0.12	0.15	0.2	0.1938	0.312814	0.391077	0.220047	0.34329	0.20479	0.235196	0.312977	0.372904
uniform	2n = 6x	20	10	ML	0.14694	0.217077	0.0113442	0.0738348	0.0257683	0.0469791	0.153883	0.23	0.11	0.21	0.14	0.27	0.27	0.5854	0.305497	0.414504	0.269612	0.403278	0.251003	0.288022	0.371505	0.434108
uniform	2n = 6x	20	10	RI	0.168033	0.263364	0.0214177	0.161488	0.00485497	0.0122181	0.0922479	0.3	0	0.3	0	0.3	0.1	0.186	0.312336	0.374682	0.211016	0.329537	0.163993	0.257083	0.230043	0.422213
uniform	2n = 6x	20	10	LO	0.176553	0.242795	0.00351124	0.139645	0.0091628	0.00648663	0.0928158	0.2	0	0.3	0.1	0.3	0.2	0.202	0.330043	0.387205	0.217741	0.339202	0.171813	0.262723	0.240581	0.43089
uniform	2n = 6x	20	10	WE	0.193674	0.25301	0.0146346	0.163704	0.00592692	0.0155412	0.0771572	0.2	0	0.2	0.1	0.3	0.2	0.176	0.373307	0.396913	0.290922	0.338747	0.238753	0.341417	0.242569	0.428331
uniform	2n = 6x	20	10	VR	NA	NA	NA	NA	NA	NA	NA	NA	NA	NA	NA	NA	NA	NA	NA	NA	NA	NA	NA	NA	NA	NA
uniform	2n = 6x	20	10	PD	NA	NA	NA	NA	NA	NA	NA	NA	NA	NA	NA	NA	NA	NA	NA	NA	NA	NA	NA	NA	NA	NA
uniform	2n = 6x	20	10	FA	NA	NA	NA	NA	NA	NA	NA	NA	NA	NA	NA	NA	NA	NA	NA	NA	NA	NA	NA	NA	NA	NA
uniform	2n = 8x	20	10	MM	0.300926	0.305706	0.116859	0.134477	0.0206032	0.0104933	0.136964	0.08	0.02	0.27	0.14	0.26	0.19	0.1616	0.181399	0.179139	0.148245	0.171392	0.130232	0.16616	0.135485	0.20685
uniform	2n = 8x	20	10	ML	0.353943	0.334416	0.147502	0.181503	0.0131569	0.0126832	0.170432	0	0.1	0.1	0	0.1	0.3	0.518	0.115401	0.119423	0.107164	0.118577	0.0414015	0.172002	-0.00202477	0.235779
uniform	2n = 8x	20	10	RI	0.402262	0.376086	0.21254	0.243581	0.0385318	0.0405097	0.100094	0	0.1	0.1	0.1	0.3	0.4	0.186	0.159406	0.106585	0.108932	0.0886221	0.0604912	0.15686	-0.0126982	0.188141
uniform	2n = 8x	20	10	LO	0.403536	0.366601	0.210996	0.230433	0.0585299	0.0427967	0.0885466	0	0.1	0	0.2	0.5	0.4	0.218	0.170329	0.10007	0.114808	0.0833411	0.0669978	0.162092	-0.0182084	0.183189
uniform	2n = 8x	20	10	WE	0.423214	0.380194	0.233906	0.243889	0.0838015	0.0618463	0.0842174	0	0.1	0	0.2	0.3	0.3	0.252	0.189672	0.0988042	0.1433	0.0757334	0.0900941	0.19569	-0.017799	0.167952
uniform	2n = 8x	20	10	VR	NA	NA	NA	NA	NA	NA	NA	NA	NA	NA	NA	NA	NA	NA	NA	NA	NA	NA	NA	NA	NA	NA
uniform	2n = 8x	20	10	PD	NA	NA	NA	NA	NA	NA	NA	NA	NA	NA	NA	NA	NA	NA	NA	NA	NA	NA	NA	NA	NA	NA
uniform	2n = 8x	20	10	FA	NA	NA	NA	NA	NA	NA	NA	NA	NA	NA	NA	NA	NA	NA	NA	NA	NA	NA	NA	NA	NA	NA
uniform	2n = 4x*	20	10	MM	0.132942	0.196604	0.0242761	0.0949662	0.00971619	0.0122927	0.0924391	0.07	0.03	0.43	0.2	0.38	0.36	0.3398	0.460508	0.533072	0.330162	0.48231	0.315436	0.34473	0.454912	0.508797
uniform	2n = 4x*	20	10	ML	0.120745	0.184483	0.00808243	0.0771047	0.0139372	0.0234499	0.143614	0.1	0.03	0.52	0.25	0.51	0.42	0.655	0.437058	0.544806	0.37233	0.532303	0.35552	0.3889	0.504883	0.558651
uniform	2n = 4x*	20	10	RI	0.112018	0.237025	0.0570004	0.086236	0.00443548	0.0112544	0.101054	0.2	0	0.3	0.1	0.7	0.3	0.362	0.409981	0.586216	0.296579	0.542909	0.248102	0.343574	0.457833	0.618132
uniform	2n = 4x*	20	10	LO	0.0788154	0.210584	0.0328221	0.0564904	0.00992369	0.00604058	0.104147	0.5	0	0.4	0.2	0.5	0.5	0.378	0.414115	0.594616	0.293732	0.560466	0.246066	0.339981	0.476238	0.634502
uniform	2n = 4x*	20	10	WE	0.104109	0.230377	0.062114	0.0800349	0.0185962	0.0207305	0.0821238	0.4	0	0.2	0.2	0.4	0.4	0.316	0.467529	0.586942	0.397582	0.524928	0.345014	0.447662	0.440749	0.599955
uniform	2n = 4x*	20	10	VR	NA	NA	NA	NA	NA	NA	NA	NA	NA	NA	NA	NA	NA	NA	NA	NA	NA	NA	NA	NA	NA	NA
uniform	2n = 4x*	20	10	PD	NA	NA	NA	NA	NA	NA	NA	NA	NA	NA	NA	NA	NA	NA	NA	NA	NA	NA	NA	NA	NA	NA
[truncated: 5,617 more rows]

## Sheet: MetaInformation
Each cell represents the value of the statistics considering all methods for the given population. Keys: dist: considered allele distribution which can be uniform (uni), triangular (tri), biallelic 1:3 (t13), biallelic 1:4 (t14), or biallelic 1:9 (t19). 2n: cytotype which can be 2n = 2x, 2n = 4x, 2n = 6x, 2n = 8x, 2n = 4x*, 2n = 6x*, or 2n = 8x*. *:for multivalent pairing, no *: just bivalent loc…
